# Supplementary material for: Drought stress in ‘Shine Muscat’ grapevine: Consequences and a novel mitigation strategy–5-aminolevulinic acid
Source: Front Plant Sci. 2023 Mar 15;14:1129114. doi: 10.3389/fpls.2023.1129114 (PMC10061586; doi:10.3389/fpls.2023.1129114)
Supplement: Supplementary file 2 [file Table_1.xlsx]

## Sheet: Table S1
	Table S1. Primer pairs of RT-qPCR
	Genes	Primer-F (5′-3′)	Primer-R (5′-3′)
	VvActin	GGAAGCTGCGGGAATTCATGAG	CCTTGATCTTCATGCTGCTGGG
	SGR	AGGCAGGTGGAACCATCAAG	ATGGGCGAGATCTTGTGACC
	TEM1	GTCAGACCGGGTCACCAAAT	GAAGTGCTTTTCCGCGTGTT
	BADH4	CAAGCGTAGTGGTTTTGGGC	AGCCCCATGGTTCATTGGAG
	GDCST	CGTGTCGGCTTCTTCTCTTC	TCTTTGTGACAACCCCATCA
	CPN60A1	AGGAAGGGATAGTGCCTGGT	CATTGCATTGTACCCGACTG
	PGD2	ATGCAAGGTTCCTCAGTGGG	TGCATAAAGTGCCTGCCTCA
	PSBR	ATCTGGCAGAAAGGGCAAGG	CACCACCTGGAGACCATTCG
	MAP1B	GTGCATGTGCCATGGGATTC	CAGTTACCCTCACAAGGCGT
	UBP15	CAAGCAGACTGTGCTGGAGA	GAACAAGCATTGGTGGCAGG
	ATG8F	GTCCCAGCTGACCTGACTGT	GAAACCCATCTGCATCCTTC

## Sheet: Table S2
	Table S2. Physiological indexes under control, Dro and Dro_ALA
	Physiological indexes	Time	Control	Dro	Dro_ALA
	MDA concent (μmol·g-1·FW)	0d	9.56±1.00 b	12.14±1.18 ab	14.14±1.07 a
		2d	8.61±0.58 c	26.68±1.45 a	21.08±0.63 b
		4d	12.69±0.86 c	31.59±2.41 a	26.34±1.13 b
		6d	10.78±0.43 c	33.03±0.83 a	29.37±1.62 b
		8d	8.5±0.54 c	34.25±1.66 a	28.64±1.06 b
		10d	12.7±0.62 c	34.93±0.95 a	27.09±1.59 b
		12d	12.6±0.61 c	33.95±1.45 a	26.14±1.87 b
		14d	12.83±1.12 c	35.34±1.16 a	27.26±0.56 b
		16d	10.23±0.92 c	35.9±0.52 a	25.98±2.68 b
	POD activity (U·g-1·min-1·FW)	0d	42.37±5.85 a	18.34±1.44 b	16.62±1.51 b
		2d	51.52±8.54 a	24.58±1.52 b	29.3±1.39 b
		4d	58.6±5.47 a	28.2±1.08 b	37.18±0.84 b
		6d	34.27±4.94 a	32.2±1 a	34.03±1.61 a
		8d	12.93±2.01 c	26.18±1.82 b	31.64±1.89 a
		10d	19.35±4.53 b	23.68±1.09 ab	29.06±0.69 a
		12d	57.9±6.35 a	16.7±1.02 b	26.23±0.3 b
		14d	19.34±0.59 b	11.63±0.88 c	22.94±0.64 a
		16d	45.92±5.41 a	8.14±1.64 c	24.15±0.73 b
	SOD acticity (U·g-1·FW)	0d	93.22±3.08 c	114.17±4.95 b	131.33±4.82 a
		2d	85.65±2.86 c	165.65±8.35 a	153.09±2.33 b
		4d	86.92±2.32 c	191.09±2.21 a	182.68±3.27 b
		6d	96.6±2.21 c	130.48±3.52 b	175.49±2.09 a
		8d	81.93±3.49 c	126.58±2.44 b	138.97±2.35 a
		10d	104.74±2.03 b	88.88±3.37 c	140.51±1.44 a
		12d	73.6±2.24 b	76.6±1.29 b	120.31±2.93 a
		14d	105.34±2.69 b	53.29±2.24 c	139.85±2.7 a
		16d	87.66±2.95 b	26.52±4.59 c	135.05±2.94 a
	Note:Values in the table are means ± SD (n = 3). Different letters in a column indicate significance of difference between treatments (P ≤ 0.05).

## Sheet: Table S3
	Table S3. Numbers of DEGs and DAMs in each comparison
	Comparison group	DEG number			DAM number
		Up	Down	All	Up	Down	All
	control vs. Dro	1853	4473	6326	210	45	255
	control vs. Dro_ALA	1575	4215	5790	107	40	147
	Dro vs. Dro_ALA	1047	1633	2680	78	249	327
	Note: RNA-seq, |log2FC|≥1, padj<0.05; DAM, VIP≥1, padj <0.05.

## Sheet: Table S4
	Table S4. The information about RNA-Seq data
	Samples	Raw reads	Clean reads	Clean reads rate	Total mapped	Uniquely mapped
	Control-1	38237666	38089846	0.9961	35805862 (94.17%)	34001114 (89.42%)
	Control-2	36854966	36733176	0.9967	34254863 (93.45%)	32535479 (88.76%)
	Control-3	40905784	40767998	0.9966	38250826 (94.02%)	36357618 (89.37%)
	Dro-1	41630668	41502684	0.9969	38854158 (93.87%)	36888100 (89.12%)
	Dro-2	42203098	41502684	0.9959	38975954 (93.01%)	37002436 (88.30%)
	Dro-3	43385160	43184354	0.9954	39848033 (92.51%)	37849573 (87.87%)
	Dro_ALA-1	40002888	39860778	0.9964	37551344 (94.46%)	35619117 (89.60%)
	Dro_ALA-2	37529276	37380278	0.996	35200311 (94.40%)	33408895 (89.60%)
	Dro_ALA-3	39365462	39215304	0.9962	36834964 (94.20%)	34939875 (89.35%)
	Note: Dro for drought treatment and Dro_ALA for drought and 5-aminolevulinic acid treatment

## Sheet: Table S5
	Table S5. FPKM of all genes
	Gene ID	control_fpkm	Dro_fpkm	Dro_ALA_fpkm	Symbol
	GrapeSMv01_01g0001	3.25	2.387	2.93	--
	GrapeSMv01_01g0002	1.89	0.16	0.45	ACR4
	GrapeSMv01_01g0003	21.087	15.07	12.91	--
	GrapeSMv01_01g0004	9.72	7.417	8.313	--
	GrapeSMv01_01g0005	41.127	24.907	33.157	Nop14
	GrapeSMv01_01g0006	0.193	0	0	--
	GrapeSMv01_01g0007	0.08	0.093	0.08	--
	GrapeSMv01_01g0008	0	0	0	--
	GrapeSMv01_01g0009	0.07	0.03	0	AP1
	GrapeSMv01_01g0010	0	0	0	MADS2
	GrapeSMv01_01g0011	0.83	0.727	1.517	At1g69160
	GrapeSMv01_01g0012	1.423	1.463	2.407	SPL6
	GrapeSMv01_01g0013	0	0	0	DL
	GrapeSMv01_01g0014	0.117	0.043	0.023	--
	GrapeSMv01_01g0015	35.767	40.9	29.58	UPTG2
	GrapeSMv01_01g0016	0	0	0	CYP85A1
	GrapeSMv01_01g0017	22.393	17.38	20.447	CB5-A
	GrapeSMv01_01g0018	0	0	0.233	--
	GrapeSMv01_01g0019	8.313	3.84	5.543	MitHPPK/DHPS
	GrapeSMv01_01g0020	23.857	11.88	20.443	FLN2
	GrapeSMv01_01g0021	15.057	23.247	12.647	PGL1
	GrapeSMv01_01g0022	2.96	2.223	2.943	FER
	GrapeSMv01_01g0023	9.94	4.707	5.697	rimP
	GrapeSMv01_01g0024	19.147	13.917	15.063	dst1
	GrapeSMv01_01g0025	0	0	0	plaa2
	GrapeSMv01_01g0026	4.873	0.207	1.837	CYP78A5
	GrapeSMv01_01g0027	24.133	14.037	19.127	SP1L1
	GrapeSMv01_01g0028	91.617	34.457	31.523	MES11
	GrapeSMv01_01g0029	9.4	7.877	11.407	Asnsd1
	GrapeSMv01_01g0030	7.18	4.813	5.873	ASNSD1
	GrapeSMv01_01g0031	7.497	3.857	3.51	NTF2
	GrapeSMv01_01g0032	7.13	3.503	3.203	--
	GrapeSMv01_01g0033	25.647	55.187	29.913	AFP2
	GrapeSMv01_01g0034	52.223	31.997	28.53	RPK2
	GrapeSMv01_01g0035	1.19	0.443	0.77	--
	GrapeSMv01_01g0036	10.4	10.483	16.773	MRS2-5
	GrapeSMv01_01g0037	0.143	0.753	1.83	--
	GrapeSMv01_01g0038	3.817	3.477	8.623	--
	GrapeSMv01_01g0039	15.95	8.967	8.24	PAP1
	GrapeSMv01_01g0040	0	0	0	--
	GrapeSMv01_01g0041	3.627	1.917	2.007	At1g69290
	GrapeSMv01_01g0042	0	0	0.043	RUS3
	GrapeSMv01_01g0043	11.697	6.33	7.167	RUS3
	GrapeSMv01_01g0044	0.817	0.37	0.463	--
	GrapeSMv01_01g0045	2.467	0.543	0.797	At1g26500
	GrapeSMv01_01g0046	67.737	21.843	24.587	UPS2
	GrapeSMv01_01g0047	85.227	36.31	32.427	erlin2-b
	GrapeSMv01_01g0048	11.143	7.163	13.573	--
	GrapeSMv01_01g0049	37.12	23.323	33.173	PDCB2
	GrapeSMv01_01g0050	14.587	6.72	7.913	At1g26460
	GrapeSMv01_01g0051	0.267	0	0.113	TPT
	GrapeSMv01_01g0052	1.077	0.74	1.14	TPT
	GrapeSMv01_01g0053	18.243	7.613	7.293	--
	GrapeSMv01_01g0054	11.53	16.41	12.693	GRF12
	GrapeSMv01_01g0055	25.74	7.173	8.313	--
	GrapeSMv01_01g0056	0	0	0	PCMP-H11
	GrapeSMv01_01g0057	23.803	15.573	16.16	PAP2
	GrapeSMv01_01g0058	1.85	0.713	2.197	PCMP-H12
	GrapeSMv01_01g0059	0.173	0.113	0.04	SNAP33
	GrapeSMv01_01g0060	55.677	31.59	39.837	RPS19A
	GrapeSMv01_01g0061	407.943	67.033	41.263	UGD1
	GrapeSMv01_01g0062	31.433	22.513	25.27	ARID2
	GrapeSMv01_01g0063	0.09	0.05	0	ZAT9
	GrapeSMv01_01g0064	52.05	36.073	37.317	WRKY57
	GrapeSMv01_01g0065	9.45	3.04	4.203	STP-1
	GrapeSMv01_01g0066	1.747	0.197	0.363	MPPbeta
	GrapeSMv01_01g0067	3.717	4.637	3.503	BGLU40
	GrapeSMv01_01g0068	0	0.057	0	BGLU40
	GrapeSMv01_01g0069	18.33	7.9	9.103	Cbwd1
	GrapeSMv01_01g0070	16.83	12.107	16.98	OsI_35919
	GrapeSMv01_01g0071	14.54	22.033	15.37	At2g03480
	GrapeSMv01_01g0072	34.667	25.147	24.61	dnajc2
	GrapeSMv01_01g0073	0	0	0	BACOVA_02659
	GrapeSMv01_01g0074	0	0.013	0	At5g61250
	GrapeSMv01_01g0075	140.477	103.997	70.003	--
	GrapeSMv01_01g0076	251.657	207.91	135.077	NRP1
	GrapeSMv01_01g0077	26.857	16.963	20.123	--
	GrapeSMv01_01g0078	39.627	46.507	77.707	--
	GrapeSMv01_01g0079	30.24	48.92	44.087	gdap2
	GrapeSMv01_01g0080	44.3	16.52	27.977	CLPF
	GrapeSMv01_01g0081	0.31	0.143	0.197	PCMP-E66
	GrapeSMv01_01g0082	0.48	0.263	0.313	PCMP-E47
	GrapeSMv01_01g0083	4.067	4.447	5.093	--
	GrapeSMv01_01g0084	0.637	0.137	0.38	--
	GrapeSMv01_01g0085	17.343	10.867	19.767	FKBP13
	GrapeSMv01_01g0086	22.85	15.757	21.117	--
	GrapeSMv01_01g0087	0.023	0.047	0.047	RPM1
	GrapeSMv01_01g0088	0	0	0	RPM1
	GrapeSMv01_01g0089	0	0	0	RPM1
	GrapeSMv01_01g0090	6.98	2.383	0.757	RPM1
	GrapeSMv01_01g0091	0.287	0.257	0.03	RPM1
	GrapeSMv01_01g0092	1.393	0.197	0.353	RPM1
	GrapeSMv01_01g0093	0.66	0.177	0.207	RPM1
	GrapeSMv01_01g0094	2.827	1.237	1.073	PMA4
	GrapeSMv01_01g0095	8.53	3.777	3.557	RPM1
	GrapeSMv01_01g0096	264.027	109.613	101.553	VSR6
	GrapeSMv01_01g0097	3.593	2.687	2.637	RBM19
	GrapeSMv01_01g0098	7.337	3.077	6.19	CLPF
	GrapeSMv01_01g0099	0.35	0.173	0.23	PCMP-E66
	GrapeSMv01_01g0100	1.283	0.39	0.497	PCMP-E47
	GrapeSMv01_01g0101	4.767	5.13	6.073	--
	GrapeSMv01_01g0102	0	0	0	--
	GrapeSMv01_01g0103	4.493	0.8	1.533	PCMP-H32
	GrapeSMv01_01g0104	8.833	5.667	10.1	FKBP13
	GrapeSMv01_01g0105	24.46	13.333	20.04	--
	GrapeSMv01_01g0106	0.013	0.073	0.01	RPM1
	GrapeSMv01_01g0107	0	0.017	0	RPM1
	GrapeSMv01_01g0108	0	0	0	RPM1
	GrapeSMv01_01g0109	6.69	6.43	0.84	RPM1
	GrapeSMv01_01g0110	0.393	0.143	0.217	RPM1
	GrapeSMv01_01g0111	8.66	3.467	3.603	RPM1
	GrapeSMv01_01g0112	48.63	18.473	16.22	VSR6
	GrapeSMv01_01g0113	0.22	0.067	0	VSR6
	GrapeSMv01_01g0114	0	0	0	VSR6
	GrapeSMv01_01g0115	7.837	4.537	5.64	RBM19
	GrapeSMv01_01g0116	5.2	3.093	3.363	--
	GrapeSMv01_01g0117	25.643	8.68	15.727	PTAC14
	GrapeSMv01_01g0118	23.53	17.45	21.873	--
	GrapeSMv01_01g0119	5.683	2.55	4.543	PCMP-H81
	GrapeSMv01_01g0120	3.203	1.717	2.257	PCMP-H81
	GrapeSMv01_01g0121	136.693	135.93	77.833	MTARC1
	GrapeSMv01_01g0122	0.143	0.1	0.077	-
	GrapeSMv01_01g0123	6.01	1.453	1.34	EMB1025
	GrapeSMv01_01g0124	33.973	19.593	28.553	CAT5
	GrapeSMv01_01g0125	6.4	4.053	6.647	tamm41
	GrapeSMv01_01g0126	6.2	5.24	2.823	--
	GrapeSMv01_01g0127	7.593	3.197	2.87	--
	GrapeSMv01_01g0128	3.497	1.733	1.21	POLH
	GrapeSMv01_01g0129	0	0	0	MYB113
	GrapeSMv01_01g0130	0	0	0	MYB1
	GrapeSMv01_01g0131	0	0	0	UFO
	GrapeSMv01_01g0132	1.13	0.347	0.807	ERG
	GrapeSMv01_01g0133	8.09	3.697	6.69	ERG
	GrapeSMv01_01g0134	39.823	27.68	29.31	SUF4
	GrapeSMv01_01g0135	8.237	3.527	4.767	PIGC
	GrapeSMv01_01g0136	17.743	14.253	17.523	--
	GrapeSMv01_01g0137	1.327	0.853	2.573	ZIP5
	GrapeSMv01_01g0138	30.5	59.237	55.153	AAH2
	GrapeSMv01_01g0139	0.833	1.32	0.997	QRT3
	GrapeSMv01_01g0140	0	0.033	0.033	QRT3
	GrapeSMv01_01g0141	0	0	0	ATL10
	GrapeSMv01_01g0142	11.287	2.833	4.71	CCT2
	GrapeSMv01_01g0143	6.417	2.63	2.587	ORRM6
	GrapeSMv01_01g0144	21.72	9.717	6.447	VQ22
	GrapeSMv01_01g0145	60.65	34.497	15.943	RAN1
	GrapeSMv01_01g0146	13.053	10.083	13.967	At2g35010
	GrapeSMv01_01g0147	0	0	0	At3g58140
	GrapeSMv01_01g0148	0.03	0	0	--
	GrapeSMv01_01g0149	31.58	24.003	23.453	GLCNAC1PUT1
	GrapeSMv01_01g0150	3.447	3.203	3.567	URED
	GrapeSMv01_01g0151	19.16	14.697	16.12	rplL
	GrapeSMv01_01g0152	8.18	5.447	5.96	purH
	GrapeSMv01_01g0153	9.113	11.717	15.06	FAR1
	GrapeSMv01_01g0154	0	0	0	--
	GrapeSMv01_01g0155	12.88	11.577	11.683	CHR4
	GrapeSMv01_01g0156	87.96	77.67	82.657	SIS8
	GrapeSMv01_01g0157	25.803	34.65	34.35	POT10
	GrapeSMv01_01g0158	36.047	18.08	17.677	At3g12800
	GrapeSMv01_01g0159	0.233	0.377	0.477	--
	GrapeSMv01_01g0160	0.17	0.377	0.123	--
	GrapeSMv01_01g0161	10.92	8.853	9.15	--
	GrapeSMv01_01g0162	0	0	0	DEFH21
	GrapeSMv01_01g0163	0	0	0	PETJ
	GrapeSMv01_01g0164	37.593	24.213	25.427	At5g05010
	GrapeSMv01_01g0165	0.057	0.07	0.037	DOR
	GrapeSMv01_01g0166	0.38	0.28	0.227	DOR
	GrapeSMv01_01g0167	5.587	3.407	1.33	ACD6
	GrapeSMv01_01g0168	3.03	2.62	3.577	dyrk2
	GrapeSMv01_01g0169	8.39	6.49	7.227	ARAD1
	GrapeSMv01_01g0170	14.297	6.377	7.88	ZBP14
	GrapeSMv01_01g0171	11.603	4.68	6.32	SRX
	GrapeSMv01_01g0172	1.253	0.503	0.617	NAP1
	GrapeSMv01_01g0173	1.307	0.49	0.937	MAA3
	GrapeSMv01_01g0174	9.697	4.667	5.393	THRRS
	GrapeSMv01_01g0175	23.187	20.57	23.43	SIS8
	GrapeSMv01_01g0176	19.823	39.89	41.193	POT10
	GrapeSMv01_01g0177	38.31	31.39	38.477	At3g12800
	GrapeSMv01_01g0178	0.15	0.28	0.38	--
	GrapeSMv01_01g0179	0	0.227	0.123	--
	GrapeSMv01_01g0180	10.73	9.247	7.9	--
	GrapeSMv01_01g0181	0	0	0	FBP24
	GrapeSMv01_01g0182	0	0	0	PETJ
	GrapeSMv01_01g0183	44.127	27.38	27.917	At5g05010
	GrapeSMv01_01g0184	0	0	0	DOR
	GrapeSMv01_01g0185	0	0.017	0.02	At3g58920
	GrapeSMv01_01g0186	1.43	0.427	0.167	--
	GrapeSMv01_01g0187	3.303	2.8	3.063	--
	GrapeSMv01_01g0188	6.393	5.843	7.57	dyrk2
	GrapeSMv01_01g0189	7.06	6.033	6.487	ARAD1
	GrapeSMv01_01g0190	4.173	2.433	2.403	ZBP14
	GrapeSMv01_01g0191	5.76	1.593	2.987	SRX
	GrapeSMv01_01g0192	7.297	4.843	5.743	NAP1
	GrapeSMv01_01g0193	25.633	16.937	18.643	VPS52
	GrapeSMv01_01g0194	4.103	6.323	9.007	FKBP17-1
	GrapeSMv01_01g0195	15.72	13.787	16.45	VAMP725
	GrapeSMv01_01g0196	0	0	0	--
	GrapeSMv01_01g0197	11.257	3.81	5.813	CPN60A2
	GrapeSMv01_01g0198	16.287	16.343	17.713	Zpr1
	GrapeSMv01_01g0199	15.983	5.22	5.053	EXO84C
	GrapeSMv01_01g0200	6.923	4.977	6.363	--
	GrapeSMv01_01g0201	128.713	133.063	76.367	PP2A9
	GrapeSMv01_01g0202	0.1	0.117	0.77	--
	GrapeSMv01_01g0203	0	0	0.077	-
	GrapeSMv01_01g0204	0.56	0.33	0.497	-
	GrapeSMv01_01g0205	32.433	22.613	21.83	PP2A9
	GrapeSMv01_01g0206	17.597	7.26	9.01	IMPL1
	GrapeSMv01_01g0207	27.49	81.677	27.913	--
	GrapeSMv01_01g0208	5.69	11.407	11.11	PP2A1
	GrapeSMv01_01g0209	15.83	29.957	11.747	--
	GrapeSMv01_01g0210	125.327	101.097	123.063	RPL27C
	GrapeSMv01_01g0211	57.683	69.017	39.07	LCAT4
	GrapeSMv01_01g0212	0	0	0	-
	GrapeSMv01_01g0213	1.933	2.283	1.523	PETJ
	GrapeSMv01_01g0214	0	0	0.127	--
	GrapeSMv01_01g0215	12.47	10.16	14.96	NAL1
	GrapeSMv01_01g0216	1.837	1.463	1.41	--
	GrapeSMv01_01g0217	0.363	0.13	0.273	yqjG
	GrapeSMv01_01g0218	85.83	103.627	100.16	yqjG
	GrapeSMv01_01g0219	1.41	0.343	0.423	At4g19890
	GrapeSMv01_01g0220	0.627	0.037	0.097	EXL7
	GrapeSMv01_01g0221	15.86	9.513	11	At4g19900
	GrapeSMv01_01g0222	3.067	22.32	6.93	--
	GrapeSMv01_01g0223	30.61	51.633	91.907	PAB2
	GrapeSMv01_01g0224	2.94	14.83	48.343	--
	GrapeSMv01_01g0225	0	0	0.2	--
	GrapeSMv01_01g0226	0	0	0.047	At2g40910
	GrapeSMv01_01g0227	0	0	0.117	At1g47790
	GrapeSMv01_01g0228	0.053	0	0.057	--
	GrapeSMv01_01g0229	21.467	9.79	10.42	GDH2
	GrapeSMv01_01g0230	7.397	4.797	5.39	SCPL35
	GrapeSMv01_01g0231	0.117	0.63	0.3	--
	GrapeSMv01_01g0232	84.873	68.78	79.67	At1g14650
	GrapeSMv01_01g0233	4.393	7.47	7.573	CYP86B1
	GrapeSMv01_01g0234	18.58	12.703	12.887	ypgQ
	GrapeSMv01_01g0235	41.173	11.75	20.99	At5g23160
	GrapeSMv01_01g0236	4.663	3.02	2.197	RPL44
	GrapeSMv01_01g0237	57.32	39.173	44.503	RPL44
	GrapeSMv01_01g0238	21.683	11.42	12.023	CLPP2
	GrapeSMv01_01g0239	3.207	1.707	2.02	--
	GrapeSMv01_01g0240	15.543	18.667	19.843	HUA2
	GrapeSMv01_01g0241	8.41	6.27	6.203	--
	GrapeSMv01_01g0242	38.133	70.22	85.797	HCF136
	GrapeSMv01_01g0243	8.567	5.667	5.17	SACS
	GrapeSMv01_01g0244	0.013	0.04	0.03	At1g48930
	GrapeSMv01_01g0245	127.543	90.57	130.59	Os04g0620700
	GrapeSMv01_01g0246	16.883	14.357	16.167	--
	GrapeSMv01_01g0247	0	0.067	0.21	--
	GrapeSMv01_01g0248	306.147	139.347	178.683	GS1-2
	GrapeSMv01_01g0249	25.293	26.147	24.327	MSP1
	GrapeSMv01_01g0250	6.06	4.637	4.107	PPT1
	GrapeSMv01_01g0251	0.037	0.067	0.08	YSL7
	GrapeSMv01_01g0252	0	0	0	YSL7
	GrapeSMv01_01g0253	0.667	0.517	0.707	YSL7
	GrapeSMv01_01g0254	10.607	12.653	9.04	M3KE1
	GrapeSMv01_01g0255	62.62	50.063	54.787	ALATS
	GrapeSMv01_01g0256	0	0	0	-
	GrapeSMv01_01g0257	0	0	0	SAP1
	GrapeSMv01_01g0258	10.04	9.423	6.103	--
	GrapeSMv01_01g0259	2.853	6.783	2.307	--
	GrapeSMv01_01g0260	434.213	269.317	138.207	--
	GrapeSMv01_01g0261	28.637	17.293	25.31	--
	GrapeSMv01_01g0262	21.33	13.52	20.603	--
	GrapeSMv01_01g0263	8.553	8.833	11.017	Ipo9
	GrapeSMv01_01g0264	0.047	0.657	0	EL5.1
	GrapeSMv01_01g0265	23.703	3.29	1.04	RHA2B
	GrapeSMv01_01g0266	0	0	0	--
	GrapeSMv01_01g0267	49.623	24.867	11.133	RHA2A
	GrapeSMv01_01g0268	0	0	0	KIN14Q
	GrapeSMv01_01g0269	3.67	2.71	3.143	hddc2
	GrapeSMv01_01g0270	0.177	0.283	0.063	hddc2
	GrapeSMv01_01g0271	29.68	15.223	9.467	PERK9
	GrapeSMv01_01g0272	0.49	1.323	0.45	--
	GrapeSMv01_01g0273	26.053	35.157	16.357	CML14
	GrapeSMv01_01g0274	71.51	70.987	17.873	ALA9
	GrapeSMv01_01g0275	15.99	9.19	9.113	TADA
	GrapeSMv01_01g0276	9.043	5.8	7.32	--
	GrapeSMv01_01g0277	2.107	4.963	3.62	PHO1-H1
	GrapeSMv01_01g0278	0.813	1.58	1.97	PHO1-H1
	GrapeSMv01_01g0279	10.34	37.657	9.88	ICMEL1
	GrapeSMv01_01g0280	0.13	0.597	0.257	--
	GrapeSMv01_01g0281	0	0	0	--
	GrapeSMv01_01g0282	0	0	0	-
	GrapeSMv01_01g0283	0	0	0	--
	GrapeSMv01_01g0284	55.947	17.64	33.597	--
	GrapeSMv01_01g0285	93.24	18.247	72.56	--
	GrapeSMv01_01g0286	1.02	2.037	1.267	ABCG21
	GrapeSMv01_01g0287	27.057	86.487	109.433	PPC4
	GrapeSMv01_01g0288	1.253	2.047	2.813	NUDT1
	GrapeSMv01_01g0289	7.273	15.163	17.803	ZCCHC8
	GrapeSMv01_01g0290	0.98	0.31	0.177	MIZ1
	GrapeSMv01_01g0291	2.043	6.003	0.953	--
	GrapeSMv01_01g0292	0	0.057	0.113	PII-2
	GrapeSMv01_01g0293	40.717	29.033	27.197	CRWN2
	GrapeSMv01_01g0294	42.053	45.333	51.85	DCP5
	GrapeSMv01_01g0295	0	0.07	0.1	At3g21360
	GrapeSMv01_01g0296	0.3	0.09	0.077	CYB561D
	GrapeSMv01_01g0297	10.4	6.343	8.387	--
	GrapeSMv01_01g0298	44.613	211.17	377.44	CHUP1
	GrapeSMv01_01g0299	1.607	1.1	0.337	--
	GrapeSMv01_01g0300	0.74	0.777	0.453	At1g26090
	GrapeSMv01_01g0301	3.67	4.617	2.397	CAT8
	GrapeSMv01_01g0302	0	0	0.04	--
	GrapeSMv01_01g0303	0	0.127	0	CLE13
	GrapeSMv01_01g0304	62.913	57.61	62.07	CCDC130
	GrapeSMv01_01g0305	0	0	0	TCP12
	GrapeSMv01_01g0306	0.15	0.12	0.077	APF2
	GrapeSMv01_01g0307	2	2.833	1.647	BHLH30
	GrapeSMv01_01g0308	0	0.077	0.08	--
	GrapeSMv01_01g0309	3.823	3.087	1.243	rngB
	GrapeSMv01_01g0310	12.733	10.977	0.873	LAR
	GrapeSMv01_01g0311	6.873	4.47	3.797	ILP1
	GrapeSMv01_01g0312	0.117	0.12	0.073	APF2
	GrapeSMv01_01g0313	0.573	1.323	0.95	BHLH30
	GrapeSMv01_01g0314	1.017	0.607	0.233	--
	GrapeSMv01_01g0315	12.027	13.793	1.017	LAR
	GrapeSMv01_01g0316	0	0	0	--
	GrapeSMv01_01g0317	9.053	5.56	5.61	ILP1
	GrapeSMv01_01g0318	3.067	1.503	1.48	--
	GrapeSMv01_01g0319	30.11	14.25	22.163	SOG1
	GrapeSMv01_01g0320	0	0	0	--
	GrapeSMv01_01g0321	48.85	110.637	211.463	STN7
	GrapeSMv01_01g0322	0.103	1.303	0.083	POT5
	GrapeSMv01_01g0323	1.56	0.323	0.077	GATL3
	GrapeSMv01_01g0324	8.533	3.58	4.133	RLP4
	GrapeSMv01_01g0325	108.503	50.057	95.893	TEM1
	GrapeSMv01_01g0326	56.74	22.427	30.457	MAP1B
	GrapeSMv01_01g0327	23.333	1	1.223	AOC
	GrapeSMv01_01g0328	0	0	0.027	WIP6
	GrapeSMv01_01g0329	9.657	46.477	33.013	HHO2
	GrapeSMv01_01g0330	18.843	24.763	42.87	--
	GrapeSMv01_01g0331	26.917	21.743	24.567	--
	GrapeSMv01_01g0332	0	0	0	-
	GrapeSMv01_01g0333	38.773	45.817	48.033	MED25
	GrapeSMv01_01g0334	4.637	1.673	2.27	At1g25530
	GrapeSMv01_01g0335	17.013	17.943	16.767	CPLS1
	GrapeSMv01_01g0336	149.303	182.39	166.287	At1g68650
	GrapeSMv01_01g0337	0.853	0.187	0.493	ASPG1
	GrapeSMv01_01g0338	14.64	8.763	11.967	DDB_G0274487
	GrapeSMv01_01g0339	0.207	0.173	0.173	PAN
	GrapeSMv01_01g0340	0	0	0	--
	GrapeSMv01_01g0341	0	0	0	CNR1
	GrapeSMv01_01g0342	0.197	0	0	PCR6
	GrapeSMv01_01g0343	0	0	0	--
	GrapeSMv01_01g0344	4.187	1.3	1.71	CXE6
	GrapeSMv01_01g0345	2.96	0.42	0.903	CXE17
	GrapeSMv01_01g0346	36.38	30.49	28.45	PP2AA2
	GrapeSMv01_01g0347	43.617	30.457	44.423	ALMT4
	GrapeSMv01_01g0348	0.06	0.03	0	ALMT9
	GrapeSMv01_01g0349	0	0	0	PSRP3
	GrapeSMv01_01g0350	4.447	4.54	9.653	--
	GrapeSMv01_01g0351	0.47	0.25	0.25	HOP2
	GrapeSMv01_01g0352	26.18	35.35	22.717	--
	GrapeSMv01_01g0353	36.907	40.593	40.16	PRPF4B
	GrapeSMv01_01g0354	8.593	10.757	8.69	--
	GrapeSMv01_01g0355	2.22	4.473	2.91	--
	GrapeSMv01_01g0356	75.943	46.23	38.037	--
	GrapeSMv01_01g0357	16.593	12.36	16.053	LTA2
	GrapeSMv01_01g0358	30.957	42.607	47.877	At4g39670
	GrapeSMv01_01g0359	29.257	65.677	119.387	NPF3.1
	GrapeSMv01_01g0360	107.753	110.98	121.627	RAD23C
	GrapeSMv01_01g0361	103.907	119.43	85.663	--
	GrapeSMv01_01g0362	45.7	10.32	1.74	--
	GrapeSMv01_01g0363	86.203	90.243	50.49	--
	GrapeSMv01_01g0364	2.113	0.353	0.537	XYL1
	GrapeSMv01_01g0365	5.973	12.46	17.21	--
	GrapeSMv01_01g0366	25.32	46.66	70.113	ERF118
	GrapeSMv01_01g0367	0.02	0.637	0.11	TKPR2
	GrapeSMv01_01g0368	0.013	0	0	CUT1
	GrapeSMv01_01g0369	9.897	4.62	0.363	HMT1
	GrapeSMv01_01g0370	27.08	20.557	25.563	FLXL3
	GrapeSMv01_01g0371	41.25	6.767	18.68	COL16
	GrapeSMv01_01g0372	0.027	0.107	0	LBD41
	GrapeSMv01_01g0373	0.057	0.037	0.057	LBD41
	GrapeSMv01_01g0374	0	0.44	0.083	--
	GrapeSMv01_01g0375	9.737	3.163	2.293	--
	GrapeSMv01_01g0376	0	0	0	--
	GrapeSMv01_01g0377	75.563	46.097	68.87	--
	GrapeSMv01_01g0378	35.797	19.763	35.693	RPL15
	GrapeSMv01_01g0379	0	0	0	JAG
	GrapeSMv01_01g0380	21.777	8.663	9.297	DDB_G0289029
	GrapeSMv01_01g0381	16.863	33.303	17.053	CSE
	GrapeSMv01_01g0382	4.467	1.277	1.41	PCMP-E78
	GrapeSMv01_01g0383	0.253	0.02	0	IPT1
	GrapeSMv01_01g0384	0	0	0	IPT1
	GrapeSMv01_01g0385	1.243	4.487	0.633	VQ8
	GrapeSMv01_01g0386	28.96	111.033	57.487	--
	GrapeSMv01_01g0387	55.79	102.02	16.177	ENDO2
	GrapeSMv01_01g0388	43.717	36.967	38.97	--
	GrapeSMv01_01g0389	177.51	188.923	219.043	--
	GrapeSMv01_01g0390	32.053	33.453	40.397	ALT3
	GrapeSMv01_01g0391	3.803	2.147	2.147	ALT3
	GrapeSMv01_01g0392	0.553	0.27	0.183	BHLH75
	GrapeSMv01_01g0393	0.083	0.347	0	MYB62
	GrapeSMv01_01g0394	138.25	48.647	77.657	OVA9
	GrapeSMv01_01g0395	0	0.113	0	PMI2
	GrapeSMv01_01g0396	0	0	0	PMI1
	GrapeSMv01_01g0397	0.75	0.293	0.257	--
	GrapeSMv01_01g0398	37.643	6.5	5.837	--
	GrapeSMv01_01g0399	0	0	0	--
	GrapeSMv01_01g0400	2.287	1.613	1.007	GIS3
	GrapeSMv01_01g0401	45.243	50.68	44.483	ATJ15
	GrapeSMv01_01g0402	1.423	0.79	0.22	LRK10
	GrapeSMv01_01g0403	2.837	0.647	0.773	--
	GrapeSMv01_01g0404	59.01	80.16	95.327	BTS
	GrapeSMv01_01g0405	43.823	62.337	66.917	BTS
	GrapeSMv01_01g0406	24.323	17.133	18.073	lactb2
	GrapeSMv01_01g0407	6.017	10.397	2.213	BC10
	GrapeSMv01_01g0408	1.077	1.44	0.653	At1g68400
	GrapeSMv01_01g0409	0	0	0.217	STE1
	GrapeSMv01_01g0410	0	0.043	0	STE1
	GrapeSMv01_01g0411	0.317	0.06	0	--
	GrapeSMv01_01g0412	0.05	0	0	PR5K
	GrapeSMv01_01g0413	3.393	1.71	0.887	Os01g0513100
	GrapeSMv01_01g0414	22.613	14.28	9.583	NDT2
	GrapeSMv01_01g0415	0.887	0.337	0.39	--
	GrapeSMv01_01g0416	4.45	0.29	1.253	LRK10L-1.1
	GrapeSMv01_01g0417	0	0	0	--
	GrapeSMv01_01g0418	4.493	1.01	1.66	LRK10L-1.1
	GrapeSMv01_01g0419	9.427	14.33	13.32	LRK10L-1.1
	GrapeSMv01_01g0420	12.067	30.607	29.403	--
	GrapeSMv01_01g0421	1.913	0.683	1.607	--
	GrapeSMv01_01g0422	3.73	1.317	3.197	PR5K
	GrapeSMv01_01g0423	1.373	0.273	0.673	--
	GrapeSMv01_01g0424	19.16	48.583	43.247	--
	GrapeSMv01_01g0425	0.19	0.033	0.117	GAT1_2.1
	GrapeSMv01_01g0426	94	155.857	214.113	--
	GrapeSMv01_01g0427	15.313	16.357	4.27	LTP-2
	GrapeSMv01_01g0428	1.207	0.59	0.217	RTNLB9
	GrapeSMv01_01g0429	1.19	1.523	2.417	--
	GrapeSMv01_01g0430	16.093	7.583	8.633	--
	GrapeSMv01_01g0431	2.867	1.743	2.383	ZAR1
	GrapeSMv01_01g0432	0	0	0	IAA32
	GrapeSMv01_01g0433	0.053	0.09	0	HIP1
	GrapeSMv01_01g0434	27.007	23.873	21.773	--
	GrapeSMv01_01g0435	0	0	0	--
	GrapeSMv01_01g0436	19.727	4.93	4.86	ELP2
	GrapeSMv01_01g0437	3.913	1.163	1.113	ELP2
	GrapeSMv01_01g0438	77.867	121.34	130.073	--
	GrapeSMv01_01g0439	3.447	4.153	5.777	LPP3
	GrapeSMv01_01g0440	19.543	18.367	20.157	-
	GrapeSMv01_01g0441	27.117	12.523	11.183	LPP2
	GrapeSMv01_01g0442	4.437	5.593	9.62	--
	GrapeSMv01_01g0443	0	0	0	--
	GrapeSMv01_01g0444	113.47	94.723	60.24	BAT1
	GrapeSMv01_01g0445	0.013	0.1	0.103	APRR6
	GrapeSMv01_01g0446	16.947	20.757	15.083	SUMO8
	GrapeSMv01_01g0447	2.467	2.963	3.9	At1g68190
	GrapeSMv01_01g0448	1.513	2.59	2.893	COL9
	GrapeSMv01_01g0449	0.147	0.13	0.117	At1g68200
	GrapeSMv01_01g0450	19.697	4.09	2.867	LRK10
	GrapeSMv01_01g0451	6.197	0.957	0.597	--
	GrapeSMv01_01g0452	10.223	2.777	3.997	LRK10
	GrapeSMv01_01g0453	37.38	43.323	52.47	--
	GrapeSMv01_01g0454	47.547	57.987	77.867	RHA2A
	GrapeSMv01_01g0455	10.26	8.083	7.557	PAPS1
	GrapeSMv01_01g0456	0.747	0.613	1.253	PHL
	GrapeSMv01_01g0457	0	0.047	0	--
	GrapeSMv01_01g0458	91.763	92.143	54.353	FBA3
	GrapeSMv01_01g0459	9.82	8.51	9.95	At1g48650
	GrapeSMv01_01g0460	14.097	11.257	12.807	At2g01130
	GrapeSMv01_01g0461	14.29	15.607	12.2	PSS1
	GrapeSMv01_01g0462	0.217	0.217	0.27	FATB1
	GrapeSMv01_01g0463	2.71	1.92	2.013	At1g22960
	GrapeSMv01_01g0464	0.543	0.73	1.537	ORC4
	GrapeSMv01_01g0465	82.943	61.073	79.457	TATC
	GrapeSMv01_01g0466	7.587	6.03	7.163	DTX12
	GrapeSMv01_01g0467	0	0	0	DTX6
	GrapeSMv01_01g0468	20.727	14.333	21.213	DTX12
	GrapeSMv01_01g0469	1.24	0.43	1.087	DTX16
	GrapeSMv01_01g0470	0	0	0	SDC
	GrapeSMv01_01g0471	8.53	4.517	6.14	ASF1B
	GrapeSMv01_01g0472	78.54	55.403	61.107	ATPB
	GrapeSMv01_01g0473	91.127	105.557	87.29	--
	GrapeSMv01_01g0474	80.097	67.843	62.893	BRO1
	GrapeSMv01_01g0475	11.603	5.103	6.633	Ttc5
	GrapeSMv01_01g0476	0.1	0	0	GLIP6
	GrapeSMv01_01g0477	103.833	106.89	56.25	--
	GrapeSMv01_01g0478	3.19	1.36	1.953	EEF1AKMT2
	GrapeSMv01_01g0479	0	0	0	--
	GrapeSMv01_01g0480	0	0	0	--
	GrapeSMv01_01g0481	0	0	0	--
	GrapeSMv01_01g0482	9.35	41.447	35.453	--
	GrapeSMv01_01g0483	11.78	10.057	10.17	QSOX1
	GrapeSMv01_01g0484	29.98	41.117	41.897	Maf1
	GrapeSMv01_01g0485	15.753	19.753	12.447	--
	GrapeSMv01_01g0486	72.503	48.507	25.97	RPI2
	GrapeSMv01_01g0487	13.017	10.44	6.403	PILS2
	GrapeSMv01_01g0488	0	0	0	--
	GrapeSMv01_01g0489	47.217	58.087	29.62	--
	GrapeSMv01_01g0490	0.83	4.513	1.353	--
	GrapeSMv01_01g0491	86.777	86.477	117.327	ABCG7
	GrapeSMv01_01g0492	4.2	12.093	1.843	GLCAT14A
	GrapeSMv01_01g0493	7.783	4.033	4.243	At1g71060
	GrapeSMv01_01g0494	1.603	4.087	2.903	--
	GrapeSMv01_01g0495	13.457	40.643	36.173	HIPP21
	GrapeSMv01_01g0496	0.21	0.267	0.25	HIPP37
	GrapeSMv01_01g0497	75.197	43.06	55.327	LPR1
	GrapeSMv01_01g0498	1.4	0.363	0.57	syc1174_c
	GrapeSMv01_01g0499	23.393	24.64	34.46	MYB308
	GrapeSMv01_01g0500	1.083	2.637	0.483	PUB10
	GrapeSMv01_01g0501	2.307	5.76	0.85	At1g66480
	GrapeSMv01_01g0502	18.67	20.807	22.897	FAB1C
	GrapeSMv01_01g0503	26.167	25.99	26.26	QPT
	GrapeSMv01_01g0504	0	0.193	0	--
	GrapeSMv01_01g0505	3.037	7.527	6.343	--
	GrapeSMv01_01g0506	17.57	24.577	24.653	--
	GrapeSMv01_01g0507	12.733	383.73	463.957	Dnajb8
	GrapeSMv01_01g0508	8.57	7.26	8.73	--
	GrapeSMv01_01g0509	3.517	1.67	4.01	--
	GrapeSMv01_01g0510	8.007	2.637	5.843	WDL7
	GrapeSMv01_01g0511	13.187	12.477	41.243	PIN3
	GrapeSMv01_01g0512	16.577	8.88	5.833	HOX3
	GrapeSMv01_01g0513	11.037	9.743	8.207	RECG
	GrapeSMv01_01g0514	9.267	4.837	6.19	--
	GrapeSMv01_01g0515	0	0	0	--
	GrapeSMv01_01g0516	10.877	12.063	10.577	SCPL50
	GrapeSMv01_01g0517	0	0	0	--
	GrapeSMv01_01g0518	5.053	3.64	5.627	SCPL50
	GrapeSMv01_01g0519	6.577	3.913	2.543	MPK9
	GrapeSMv01_01g0520	7.45	3.66	3.453	MPK9
	GrapeSMv01_01g0521	3.317	1.95	1.54	--
	GrapeSMv01_01g0522	25.387	44.977	58.64	NUDT25
	GrapeSMv01_01g0523	11.08	23.3	19.197	udkC
	GrapeSMv01_01g0524	36.05	34.137	37.8	STL2P
	GrapeSMv01_01g0525	12.983	4.677	18.947	SULTR3;3
	GrapeSMv01_01g0526	4.12	2.97	3.803	CPN10
	GrapeSMv01_01g0527	16.663	52.737	27.733	ESMD1
	GrapeSMv01_01g0528	35.133	24.233	22.63	PAHX
	GrapeSMv01_01g0529	0.657	0.087	0.093	WOX1
	GrapeSMv01_01g0530	104.193	19.077	9.3	--
	GrapeSMv01_01g0531	0	0	0	psaB
	GrapeSMv01_01g0532	1.813	0.36	0.433	PCMP-H37
	GrapeSMv01_01g0533	12.077	10.427	16.013	--
	GrapeSMv01_01g0534	2.607	0.62	0.92	MLP423
	GrapeSMv01_01g0535	0	0	0	MLP28
	GrapeSMv01_01g0536	0	0	0	-
	GrapeSMv01_01g0537	18.097	3.81	16.917	MLP34
	GrapeSMv01_01g0538	2.13	0.05	0.647	MLP34
	GrapeSMv01_01g0539	0	0	0	MLP43
	GrapeSMv01_01g0540	0.113	0	0	MLP43
	GrapeSMv01_01g0541	0	0	0	MLP43
	GrapeSMv01_01g0542	0	0	0	MLP43
	GrapeSMv01_01g0543	0	0	0	MLP34
	GrapeSMv01_01g0544	0	0	0.09	MLP28
	GrapeSMv01_01g0545	6.32	0.653	4.613	MLP28
	GrapeSMv01_01g0546	0	0	0	MLP28
	GrapeSMv01_01g0547	5.567	0.85	5.49	MLP28
	GrapeSMv01_01g0548	6.097	2.317	7.623	NMT2
	GrapeSMv01_01g0549	0.013	0.013	0.013	PEAMT
	GrapeSMv01_01g0550	124.587	71.94	89.287	CAR7
	GrapeSMv01_01g0551	141.99	87.203	42.157	--
	GrapeSMv01_01g0552	13.067	11.23	20.257	GAI1
	GrapeSMv01_01g0553	0.15	0.08	0.103	--
	GrapeSMv01_01g0554	0.58	0.163	0.203	At2g44510
	GrapeSMv01_01g0555	58.523	61.693	41.53	--
	GrapeSMv01_01g0556	11.413	8.337	19.81	ndhL
	GrapeSMv01_01g0557	25.93	10.877	17.293	--
	GrapeSMv01_01g0558	2.497	4.477	7.85	TLP1
	GrapeSMv01_01g0559	69.197	46.423	49.327	At1g14910
	GrapeSMv01_01g0560	13.793	7.807	4.89	MYOB2
	GrapeSMv01_01g0561	26.01	18.273	14.74	CRK10
	GrapeSMv01_01g0562	25.097	23.63	26.053	HMGIY2
	GrapeSMv01_01g0563	126.44	130.473	124.29	PGM1
	GrapeSMv01_01g0564	11.263	2.283	1.573	PME6
	GrapeSMv01_01g0565	1.773	0.16	0.92	PMEI11
	GrapeSMv01_01g0566	25.61	21.283	20.95	ARPC2A
	GrapeSMv01_01g0567	3.22	0.563	1.233	PMEI11
	GrapeSMv01_01g0568	5.557	30.167	23.86	PCR2
	GrapeSMv01_01g0569	0.85	1.737	7.03	PCR2
	GrapeSMv01_01g0570	180.03	74.757	72.073	PCR2
	GrapeSMv01_01g0571	7.453	2.85	1.517	dlcB
	GrapeSMv01_01g0572	2.05	13.123	6.87	SKIP28
	GrapeSMv01_01g0573	4.533	2.9	4.497	At2g01630
	GrapeSMv01_01g0574	30.867	24.547	25.573	MED23
	GrapeSMv01_01g0575	203.903	202.8	267.08	TIFY6B
	GrapeSMv01_01g0576	43.143	23.027	17.87	PUX2
	GrapeSMv01_01g0577	36.463	21.81	9.097	RLK902
	GrapeSMv01_01g0578	0.38	0.073	0.073	--
	GrapeSMv01_01g0579	36.357	46.863	42.457	--
	GrapeSMv01_01g0580	3.217	7.237	0.873	PDLP6
	GrapeSMv01_01g0581	2.52	5.467	3.14	PXG4
	GrapeSMv01_01g0582	62.84	74.883	69.11	UEV1A
	GrapeSMv01_01g0583	64.633	231.037	140.407	At1g06650
	GrapeSMv01_01g0584	2.153	2.84	1.66	--
	GrapeSMv01_01g0585	1.14	1.79	0.837	--
	GrapeSMv01_01g0586	2.683	4.61	3.253	--
	GrapeSMv01_01g0587	15.52	20.417	6.67	NUDT18
	GrapeSMv01_01g0588	24.91	12.737	8.217	--
	GrapeSMv01_01g0589	10.957	4.583	8.033	--
	GrapeSMv01_01g0590	26.023	32.003	42.113	At2g01680
	GrapeSMv01_01g0591	49.243	101.397	71.643	VAC14
	GrapeSMv01_01g0592	13.843	11.73	12.46	NUP155
	GrapeSMv01_01g0593	1.497	0.867	0.947	LPXC1
	GrapeSMv01_01g0594	34.117	48.673	55.863	RIE1
	GrapeSMv01_01g0595	6.313	5.497	6.297	CPSF73-II
	GrapeSMv01_01g0596	20.497	4.397	6.18	MAP70.2
	GrapeSMv01_01g0597	0.063	0.01	0.063	DRP1C
	GrapeSMv01_01g0598	25.343	133.037	251	ADO3
	GrapeSMv01_01g0599	0.697	0.117	0.223	--
	GrapeSMv01_01g0600	44.757	31.33	31.903	RR21
	GrapeSMv01_01g0601	0	0	0	--
	GrapeSMv01_01g0602	25.363	8.66	8.077	--
	GrapeSMv01_01g0603	36.023	19.43	26.983	asd
	GrapeSMv01_01g0604	3.087	1.567	1.17	RDR1
	GrapeSMv01_01g0605	47.81	20.323	26.21	RDR1
	GrapeSMv01_01g0606	2.683	3.743	1.953	LAMT
	GrapeSMv01_01g0607	55.813	23.187	23.497	LAMT
	GrapeSMv01_01g0608	93.013	53.827	37.927	LAMT
	GrapeSMv01_01g0609	3.37	1.543	2.003	LAMT
	GrapeSMv01_01g0610	87.833	116.31	100.713	LAMT
	GrapeSMv01_01g0611	32.503	76.417	52.047	At1g14780
	GrapeSMv01_01g0612	16.977	35.643	22.093	At1g14780
	GrapeSMv01_01g0613	19.21	40.703	51.067	TPS6
	GrapeSMv01_01g0614	0	0	0	KNATM
	GrapeSMv01_01g0615	0	0	0	--
	GrapeSMv01_01g0616	53.32	28.177	35.473	HSFA8
	GrapeSMv01_01g0617	9.597	6.483	5.42	VIT1
	GrapeSMv01_01g0618	2.003	0.13	0.213	VIT1
	GrapeSMv01_01g0619	44.2	17.41	19.433	SmD2
	GrapeSMv01_01g0620	29.983	34.237	33.773	CCZ1A
	GrapeSMv01_01g0621	0.3	0.197	0.08	SDS
	GrapeSMv01_01g0622	25.373	6.363	5.773	BPA1
	GrapeSMv01_01g0623	4.8	2.637	2.203	--
	GrapeSMv01_01g0624	20.33	19.1	16.283	POD1
	GrapeSMv01_01g0625	18.72	3.49	3.177	At1g34300
	GrapeSMv01_01g0626	0.033	0.083	0.09	At4g32285
	GrapeSMv01_01g0627	25.3	30.173	33.987	THO2
	GrapeSMv01_01g0628	0	0	0.057	--
	GrapeSMv01_01g0629	119.573	124.713	26.917	PUB21
	GrapeSMv01_01g0630	16.3	21.307	13.933	TMK1
	GrapeSMv01_01g0631	0	0	0	BAT1
	GrapeSMv01_01g0632	0	0	0	CjBAp12
	GrapeSMv01_01g0633	4.423	1.223	2.437	AHK4
	GrapeSMv01_01g0634	20.57	6.117	15.09	ZFP4
	GrapeSMv01_01g0635	82.257	26.42	23.97	OBE3
	GrapeSMv01_01g0636	0	0	0	Os02g0642300
	GrapeSMv01_01g0637	3.793	3.673	1.16	CYB561C
	GrapeSMv01_01g0638	120.53	158.947	268.393	XTH27
	GrapeSMv01_01g0639	50.42	37.013	38.12	ASB1
	GrapeSMv01_01g0640	33.67	8.633	6.95	ALKBH10B
	GrapeSMv01_01g0641	4.59	2.677	2.86	--
	GrapeSMv01_01g0642	33.01	35.703	19.61	PAP3
	GrapeSMv01_01g0643	29.257	45.467	41.893	ANN5
	GrapeSMv01_01g0644	0.02	0.457	0.79	IP5P9
	GrapeSMv01_01g0645	0.483	0.11	0.333	CYCJ18
	GrapeSMv01_01g0646	14.987	11.367	18.993	MAP65-6
	GrapeSMv01_01g0647	14.203	11.113	11.307	IAR1
	GrapeSMv01_01g0648	0.567	0.16	0.19	ZHD11
	GrapeSMv01_01g0649	0.17	0.14	0.063	At1g25240
	GrapeSMv01_01g0650	23.177	8.793	10.433	BPC1
	GrapeSMv01_01g0651	0	0	0	MS1
	GrapeSMv01_01g0652	1.873	0.403	0.657	IDD14
	GrapeSMv01_01g0653	0	0	0	RCOM_1206790
	GrapeSMv01_01g0654	1.543	1.327	1.48	BRL2
	GrapeSMv01_01g0655	0	0.037	0	COR2
	GrapeSMv01_01g0656	0.503	1.46	0.347	COR2
	GrapeSMv01_01g0657	0	0	0	SAUR71
	GrapeSMv01_01g0658	497.487	2143.1	1829.1	COR2
	GrapeSMv01_01g0659	21.86	167.617	25.56	COR2
	GrapeSMv01_01g0660	40.24	35.18	32.857	COR2
	GrapeSMv01_01g0661	6.407	2.857	2.15	GALUR
	GrapeSMv01_01g0662	0	0	0	ISPH
	GrapeSMv01_01g0663	0	0	0	GALUR
	GrapeSMv01_01g0664	111.38	89.813	83.933	TMN2
	GrapeSMv01_01g0665	8.41	5.07	4.343	NHX7
	GrapeSMv01_01g0666	22.747	16.933	21.443	HAK17
	GrapeSMv01_01g0667	3.56	1.977	0.723	--
	GrapeSMv01_01g0668	0	0.18	0	--
	GrapeSMv01_01g0669	2.44	0.56	0.583	--
	GrapeSMv01_01g0670	25.373	2.24	3.48	--
	GrapeSMv01_01g0671	6.973	2.983	1.78	GAD1
	GrapeSMv01_01g0672	1.15	0.963	0.463	GAD
	GrapeSMv01_01g0673	98.78	131.283	91.86	NPF8.3
	GrapeSMv01_01g0674	92.74	73.393	91.45	TIF3I1
	GrapeSMv01_01g0675	0.163	0.467	0.313	--
	GrapeSMv01_01g0676	0	0.027	0.11	--
	GrapeSMv01_01g0677	0.407	0.167	0.173	-
	GrapeSMv01_01g0678	48.357	33.21	36.107	At2g02050
	GrapeSMv01_01g0679	0.3	0.343	0.2	TA1
	GrapeSMv01_01g0680	1.167	2.443	0.667	At1g14600
	GrapeSMv01_01g0681	5.383	3.953	3.837	--
	GrapeSMv01_01g0682	0	0	0	KCR1
	GrapeSMv01_01g0683	0	0	0	ALDH2B7
	GrapeSMv01_01g0684	0	0	0	ALDH2B4
	GrapeSMv01_01g0685	0	0	0	KCR1
	GrapeSMv01_01g0686	15.293	7.033	10.467	KCR1
	GrapeSMv01_01g0687	4.56	3.26	4.443	--
	GrapeSMv01_01g0688	1.56	1.787	1.92	--
	GrapeSMv01_01g0689	128.947	129.763	302.94	PSBY
	GrapeSMv01_01g0690	49.237	31.647	32.93	ALB4
	GrapeSMv01_01g0691	61.707	96.957	27.037	UVR8
	GrapeSMv01_01g0692	0	0	0	--
	GrapeSMv01_01g0693	0.187	0	0.077	At1g67750
	GrapeSMv01_01g0694	32.77	18.56	24.517	CCT5
	GrapeSMv01_01g0695	34.75	26.997	26.297	CG7185
	GrapeSMv01_01g0696	25.737	24.68	31.357	ARP3
	GrapeSMv01_01g0697	5.893	2.78	4.557	ORP1D
	GrapeSMv01_01g0698	21.26	17.347	21.673	SDAD1
	GrapeSMv01_01g0699	5.167	3.82	4.963	At3g26115
	GrapeSMv01_01g0700	0	0	0	TE1
	GrapeSMv01_01g0701	0.11	0.213	0.023	CYSEP
	GrapeSMv01_01g0702	27.077	19.033	16.527	--
	GrapeSMv01_01g0703	0	0	0	ABCB15
	GrapeSMv01_01g0704	0	0	0	--
	GrapeSMv01_01g0705	0	0	0	Os02g0190300
	GrapeSMv01_01g0706	0.317	0.63	0.56	JGB
	GrapeSMv01_01g0707	8.36	3.457	3.657	--
	GrapeSMv01_01g0708	0	0	0	--
	GrapeSMv01_01g0709	1.743	1.96	0.543	SEOB
	GrapeSMv01_01g0710	0.683	1.097	0.94	SEOC
	GrapeSMv01_01g0711	0.607	0.453	0.693	SEOC
	GrapeSMv01_01g0712	1.04	0.027	0.677	CYP86B1
	GrapeSMv01_01g0713	104.05	78.38	84.887	PBB2
	GrapeSMv01_01g0714	4.783	6.927	2.97	--
	GrapeSMv01_01g0715	11.88	8.363	8.53	GLE1
	GrapeSMv01_01g0716	68.12	44.07	59.213	RGLG1
	GrapeSMv01_01g0717	0	0	0	PATL6
	GrapeSMv01_01g0718	41.6	49.637	32.337	--
	GrapeSMv01_01g0719	1.94	0.517	2.117	-
	GrapeSMv01_01g0720	2.357	5.573	11.923	CYP71B35
	GrapeSMv01_01g0721	0.08	0	0.053	--
	GrapeSMv01_01g0722	1.263	19.48	8.407	CYP71B35
	GrapeSMv01_01g0723	0.053	0.533	1.307	CYP71B35
	GrapeSMv01_01g0724	0.133	0.63	0.727	CYP71B35
	GrapeSMv01_01g0725	31.853	37.997	37.58	AFC2
	GrapeSMv01_01g0726	0.48	0.957	1.047	--
	GrapeSMv01_01g0727	0.253	0.077	0	--
	GrapeSMv01_01g0728	1.773	0.4	0.323	--
	GrapeSMv01_01g0729	59.743	67.41	65.143	MKP1
	GrapeSMv01_01g0730	13.067	8.413	10.337	COIL
	GrapeSMv01_01g0731	2.263	0.98	0.56	--
	GrapeSMv01_01g0732	21.163	11.257	11.46	PAGR
	GrapeSMv01_01g0733	4.877	1.397	1.027	--
	GrapeSMv01_01g0734	6.583	2.493	1.49	--
	GrapeSMv01_01g0735	6.053	2.173	1.387	--
	GrapeSMv01_01g0736	8.203	8.62	7.98	RID1
	GrapeSMv01_01g0737	4.867	1.943	2.037	SP1L1
	GrapeSMv01_01g0738	11.65	7.433	7.267	At2g03690
	GrapeSMv01_01g0739	111.993	120.773	110.463	SUFE2
	GrapeSMv01_01g0740	37.21	42.057	48.28	EIF4B1
	GrapeSMv01_01g0741	0.247	0.573	0.68	At5g14450
	GrapeSMv01_01g0742	3.293	1.27	1.053	At3g26430
	GrapeSMv01_01g0743	0.357	0.193	0.317	At3g26430
	GrapeSMv01_01g0744	0.323	0.113	0.107	At3g26430
	GrapeSMv01_01g0745	3.357	1.027	2.49	--
	GrapeSMv01_01g0746	0.1	0.203	0.103	At1g67820
	GrapeSMv01_01g0747	0	0	0	--
	GrapeSMv01_01g0748	20.693	25.72	40.963	CSK
	GrapeSMv01_01g0749	34.447	12.343	9.383	--
	GrapeSMv01_01g0750	25.863	82.33	61.517	XERICO
	GrapeSMv01_01g0751	1.943	6.257	2.883	--
	GrapeSMv01_01g0752	18.383	20.637	25.373	--
	GrapeSMv01_01g0753	0	0	0	--
	GrapeSMv01_01g0754	1.167	2.617	0.43	--
	GrapeSMv01_01g0755	38.293	51.483	30.797	--
	GrapeSMv01_01g0756	11.273	4.01	14.683	At1g67900
	GrapeSMv01_01g0757	0.61	0.78	1.647	--
	GrapeSMv01_01g0758	0	0	0.02	ESR1
	GrapeSMv01_01g0759	0.11	0.163	0.18	--
	GrapeSMv01_01g0760	0	0.073	0	--
	GrapeSMv01_01g0761	27.907	58.963	52.21	--
	GrapeSMv01_01g0762	15.783	37.327	79.67	PHT2-1
	GrapeSMv01_01g0763	2.81	2.637	2.03	--
	GrapeSMv01_01g0764	3.833	3.14	2.53	RAY1
	GrapeSMv01_01g0765	2.593	1.407	1.397	RAY1
	GrapeSMv01_01g0766	18.2	19.623	19.02	--
	GrapeSMv01_01g0767	18.4	46.033	20.18	ABCB26
	GrapeSMv01_01g0768	0	0	0	DJ1B
	GrapeSMv01_01g0769	380.82	426.47	188.073	--
	GrapeSMv01_01g0770	274.397	255.317	320.753	RPL27AC
	GrapeSMv01_01g0771	8.187	9.667	12.29	DTX29
	GrapeSMv01_01g0772	5.34	18.49	17.977	DTX29
	GrapeSMv01_01g0773	0	0	0.087	--
	GrapeSMv01_01g0774	0.883	3.08	9.883	--
	GrapeSMv01_01g0775	0	0	0	--
	GrapeSMv01_01g0776	15.257	21.357	16.773	maoI
	GrapeSMv01_01g0777	5.147	3.77	2.687	--
	GrapeSMv01_01g0778	14.347	12.973	13.51	At1g70590
	GrapeSMv01_01g0779	3.013	3.843	1.613	SMR15
	GrapeSMv01_01g0780	140.8	321.65	571.87	GGAT2
	GrapeSMv01_01g0781	7.683	2.923	2.55	PRS3
	GrapeSMv01_01g0782	12.09	8.76	7.513	trpD
	GrapeSMv01_01g0783	0.057	0.027	0	PHS1
	GrapeSMv01_01g0784	0	0.05	0	--
	GrapeSMv01_01g0785	27.39	20.203	20.617	AP1M2
	GrapeSMv01_01g0786	0.157	0	0	At1g58602
	GrapeSMv01_01g0787	0	0	0	TAA1
	GrapeSMv01_01g0788	0.053	0.017	0	TAA1
	GrapeSMv01_01g0789	15.32	21.59	20.843	lip
	GrapeSMv01_01g0790	9.183	6.053	8.277	At1g60770
	GrapeSMv01_01g0791	7.18	3.417	4.857	--
	GrapeSMv01_01g0792	0	0	0	--
	GrapeSMv01_01g0793	158.61	169.133	271.4	R1
	GrapeSMv01_01g0794	0.317	0	0	--
	GrapeSMv01_01g0795	44.797	20.7	43.687	NRT2.5
	GrapeSMv01_01g0796	0	0	0	--
	GrapeSMv01_01g0797	0	0	0	At1g48100
	GrapeSMv01_01g0798	11.79	6.853	7.527	CRK3
	GrapeSMv01_01g0799	0.857	0.32	0.283	CRK2
	GrapeSMv01_01g0800	35.687	8.863	10.98	CRK2
	GrapeSMv01_01g0801	4.167	1.74	3.213	MENG
	GrapeSMv01_01g0802	0	0	0	CRK2
	GrapeSMv01_01g0803	0	0	0	MENG
	GrapeSMv01_01g0804	0.223	0.033	0	KNAT6
	GrapeSMv01_01g0805	3.487	4.333	5.107	TBL2
	GrapeSMv01_01g0806	9.207	5.76	11.683	NIK3
	GrapeSMv01_01g0807	2.733	2.507	0.49	At1g23390
	GrapeSMv01_01g0808	169.367	100.39	55.477	ACLA-1
	GrapeSMv01_01g0809	28.65	22.12	18.757	--
	GrapeSMv01_01g0810	29.183	13.11	9.163	--
	GrapeSMv01_01g0811	0	0	0	--
	GrapeSMv01_01g0812	0	0	0	YAB4
	GrapeSMv01_01g0813	0.483	0.153	0.993	--
	GrapeSMv01_01g0814	0.317	0.383	0.52	NRPB10L
	GrapeSMv01_01g0815	0	0	0	--
	GrapeSMv01_01g0816	46.827	20.767	8.487	BRG3
	GrapeSMv01_01g0817	6.087	5.48	6.61	rbm48
	GrapeSMv01_01g0818	30.253	17.233	17.817	--
	GrapeSMv01_01g0819	0.843	0.15	0.13	PCMP-H42
	GrapeSMv01_01g0820	0	0	0	At1g48100
	GrapeSMv01_01g0821	41.213	18.707	26.653	At1g23400
	GrapeSMv01_01g0822	11.287	5.723	7.63	At1g23400
	GrapeSMv01_01g0823	0.027	0.23	0	--
	GrapeSMv01_01g0824	24.51	26.057	25.447	VPS34
	GrapeSMv01_01g0825	267.067	211.353	240.563	ARF
	GrapeSMv01_01g0826	256.34	535.313	601.42	ISU1
	GrapeSMv01_01g0827	652.603	4565.71	5355.69	GOLS1
	GrapeSMv01_01g0828	1.593	0.8	0.913	MTOPVIB
	GrapeSMv01_01g0829	2.07	1.02	0.69	MTOPVIB
	GrapeSMv01_01g0830	54.243	76.887	72.723	PANK2
	GrapeSMv01_01g0831	28.197	22.973	18.717	--
	GrapeSMv01_01g0832	7.373	8.3	5.77	At1g60420
	GrapeSMv01_01g0833	57.313	20.177	4.503	At1g60420
	GrapeSMv01_01g0834	67.173	41.257	7.56	At1g60420
	GrapeSMv01_01g0835	0	0	0.11	--
	GrapeSMv01_01g0836	0.193	0.217	0.047	SBT5.5
	GrapeSMv01_01g0837	5.323	5.603	3.98	At1g60420
	GrapeSMv01_01g0838	0	0	0	--
	GrapeSMv01_01g0839	72.617	20.657	22.3	At1g60420
	GrapeSMv01_01g0840	1.207	0.763	0.257	VIT_06s0061g00120
	GrapeSMv01_01g0841	2.18	2.8	1.717	--
	GrapeSMv01_01g0842	0	0	0	--
	GrapeSMv01_01g0843	0.097	0.073	0.1	BHLH90
	GrapeSMv01_01g0844	10.343	6.13	3.51	At5g61370
	GrapeSMv01_01g0845	0.067	0.027	0.02	PERK13
	GrapeSMv01_01g0846	33.683	168.22	32.51	SRO2
	GrapeSMv01_01g0847	0.62	0.033	0.05	fray2
	GrapeSMv01_01g0848	0	0	0	--
	GrapeSMv01_01g0849	37.353	76.37	55.81	--
	GrapeSMv01_01g0850	8.497	9.473	12.663	AMSH2
	GrapeSMv01_01g0851	117.14	47.303	47.033	BCA2
	GrapeSMv01_01g0852	0	0	0	WER
	GrapeSMv01_01g0853	133.827	67.17	123.55	EO
	GrapeSMv01_01g0854	0.317	2.083	0.27	MPAO1
	GrapeSMv01_01g0855	0	0.017	0	MPAO1
	GrapeSMv01_01g0856	0	0	0	-
	GrapeSMv01_01g0857	0	0	0	MPAO1
	GrapeSMv01_01g0858	26.703	14.043	15.327	AAP19-2
	GrapeSMv01_01g0859	30.78	27.433	25.25	At4g28440
	GrapeSMv01_01g0860	0.013	0.027	0.027	GP2
	GrapeSMv01_01g0861	0.027	0.023	0.107	AMS
	GrapeSMv01_01g0862	0.277	0.06	0.013	GP1
	GrapeSMv01_01g0863	0	0	0	--
	GrapeSMv01_01g0864	0	0	0	mettl21a
	GrapeSMv01_01g0865	0.077	0	0.1	--
	GrapeSMv01_01g0866	1.81	0.3	1.35	BHLH167
	GrapeSMv01_01g0867	2.507	0.283	0.71	--
	GrapeSMv01_01g0868	1.98	0.087	1.143	BHLH168
	GrapeSMv01_01g0869	0.043	0	0	BHLH167
	GrapeSMv01_01g0870	0	0	0	At1g65660
	GrapeSMv01_01g0871	0	0	0	--
	GrapeSMv01_01g0872	0.047	0	0.087	--
	GrapeSMv01_01g0873	0	0	0	--
	GrapeSMv01_01g0874	0	0	0	-
	GrapeSMv01_01g0875	0	0	0	CPSF160
	GrapeSMv01_01g0876	0.047	0.043	0	BHLH168
	GrapeSMv01_01g0877	1.483	0.327	0.303	GASA4
	GrapeSMv01_01g0878	0.063	0.173	0.067	--
	GrapeSMv01_01g0879	0	0	0	-
	GrapeSMv01_01g0880	0.14	0	0.097	BHLH168
	GrapeSMv01_01g0881	0	0	0	-
	GrapeSMv01_01g0882	0.913	0.41	0.177	--
	GrapeSMv01_01g0883	41.543	31.783	33.03	Cdc40
	GrapeSMv01_01g0884	3.54	2.033	2.397	--
	GrapeSMv01_01g0885	6.36	5.17	5.85	rlmN
	GrapeSMv01_01g0886	16.663	6.88	9.59	DDB_G0272484
	GrapeSMv01_01g0887	0.307	0.183	0.207	--
	GrapeSMv01_01g0888	6.397	8.653	5.663	ULP1D
	GrapeSMv01_01g0889	120.53	81.397	75.95	RBM25
	GrapeSMv01_01g0890	0.763	0.727	0.6	MBD9
	GrapeSMv01_01g0891	27.257	26.687	25.81	ENT1
	GrapeSMv01_01g0892	0.497	0.33	0.263	At5g18500
	GrapeSMv01_01g0893	27.243	107.387	132.28	PUB18
	GrapeSMv01_01g0894	17.367	63.417	85.287	PUB18
	GrapeSMv01_01g0895	0	0	0	--
	GrapeSMv01_01g0896	22.5	5.163	0.737	XTH33
	GrapeSMv01_01g0897	0	0	0	ALDH2B7
	GrapeSMv01_01g0898	398.72	478.37	297.77	ALDH2B4
	GrapeSMv01_01g0899	36.593	51.35	55.243	PRP31
	GrapeSMv01_01g0900	63.043	36.65	45.013	SPDSYN1
	GrapeSMv01_01g0901	0.223	0.067	0.037	--
	GrapeSMv01_01g0902	13.09	5.903	7.133	--
	GrapeSMv01_01g0903	0.973	1.03	1.35	-
	GrapeSMv01_01g0904	0.073	0.09	0.11	--
	GrapeSMv01_01g0905	40.23	30.02	38.577	RSZ21
	GrapeSMv01_01g0906	13.227	9.437	8.807	POT12
	GrapeSMv01_01g0907	10.147	8.463	10.557	HAK23
	GrapeSMv01_01g0908	10.657	12.503	10.513	POT6
	GrapeSMv01_01g0909	1.64	1.94	2.657	POT8
	GrapeSMv01_01g0910	29.913	111.79	44.717	TPS9
	GrapeSMv01_01g0911	0.47	1.707	0.533	--
	GrapeSMv01_01g0912	0	0	0	--
	GrapeSMv01_01g0913	0.83	0.52	0.357	ATL46
	GrapeSMv01_01g0914	0	0	0	--
	GrapeSMv01_01g0915	38.083	29.987	29.47	At1g60070
	GrapeSMv01_01g0916	15.603	19.363	15.943	--
	GrapeSMv01_01g0917	1.463	0.493	0.7	--
	GrapeSMv01_01g0918	47.187	31.137	35.393	THRRS
	GrapeSMv01_01g0919	3.363	2.49	2.35	RSS3
	GrapeSMv01_01g0920	3.533	1.023	2.2	At5g40240
	GrapeSMv01_01g0921	0	0	0	--
	GrapeSMv01_01g0922	0	0.027	0	At5g40240
	GrapeSMv01_01g0923	7.823	7.667	12.337	At3g28050
	GrapeSMv01_01g0924	0.02	0.037	0	At5g40240
	GrapeSMv01_01g0925	6.517	3.543	5.18	At3g28050
	GrapeSMv01_01g0926	0.047	0.027	0.013	At1g70260
	GrapeSMv01_01g0927	0	0	0	HSP17.4
	GrapeSMv01_01g0928	0.02	0.097	0.043	MLP423
	GrapeSMv01_01g0929	0.107	0.11	0.027	PBL28
	GrapeSMv01_01g0930	2.53	3.82	7.36	--
	GrapeSMv01_01g0931	17.503	7.837	10.723	--
	GrapeSMv01_01g0932	0	0	0	GASA1
	GrapeSMv01_01g0933	6.403	0.423	0.533	UGT74B1
	GrapeSMv01_01g0934	17.453	9.343	19.607	Os09g0383400
	GrapeSMv01_01g0935	13.577	8.097	17.117	RH22
	GrapeSMv01_01g0936	2.56	2.567	2.997	POLL
	GrapeSMv01_01g0937	0	0.087	0	--
	GrapeSMv01_01g0938	0.03	0.013	0.017	-
	GrapeSMv01_01g0939	0	0	0	-
	GrapeSMv01_01g0940	6.767	1.87	3.737	PRIN2
	GrapeSMv01_01g0941	6.02	2.59	2.34	yuxK
	GrapeSMv01_01g0942	7.623	5.013	6.133	Rv2228c
	GrapeSMv01_01g0943	7.147	2.15	3.543	--
	GrapeSMv01_01g0944	12.85	10.66	20.03	CYCD1-1
	GrapeSMv01_01g0945	1.787	0.66	1.033	PRIN2
	GrapeSMv01_01g0946	2.04	2.517	2.7	--
	GrapeSMv01_01g0947	7.907	6.89	4.403	NAT6
	GrapeSMv01_01g0948	29.013	23.55	22.363	LSM12
	GrapeSMv01_01g0949	16.477	20.187	23.38	VIR
	GrapeSMv01_01g0950	4.023	1.167	0.697	AXY4
	GrapeSMv01_01g0951	1.833	0.72	1.273	ILL1
	GrapeSMv01_01g0952	86.327	23.097	8.057	ILL1
	GrapeSMv01_01g0953	0.1	0.093	0.027	PER65
	GrapeSMv01_01g0954	131.363	43.05	51.61	ATJ16
	GrapeSMv01_01g0955	1.397	1.08	0.4	ZFP5
	GrapeSMv01_01g0956	9.137	5.133	5.65	--
	GrapeSMv01_01g0957	0	0	0	--
	GrapeSMv01_01g0958	0	0	0	POX1
	GrapeSMv01_01g0959	36.14	6.143	4.967	JGB
	GrapeSMv01_01g0960	15.197	36.943	9.49	2MMP
	GrapeSMv01_01g0961	6.97	22.243	5.58	--
	GrapeSMv01_01g0962	109.74	113.74	61.07	--
	GrapeSMv01_01g0963	9.63	4.103	4.917	--
	GrapeSMv01_01g0964	3.373	0.603	0.63	ARR4
	GrapeSMv01_01g0965	0.633	0.21	0.113	FH4
	GrapeSMv01_01g0966	30.073	12.417	12.693	WDL7
	GrapeSMv01_01g0967	0.453	0.39	0.147	GLP7
	GrapeSMv01_01g0968	24.717	33.97	15.35	GATL9
	GrapeSMv01_01g0969	112.057	104.44	89.52	E1
	GrapeSMv01_01g0970	13.14	15.727	21.26	ISE2
	GrapeSMv01_01g0971	56.57	65.847	57.61	SNL3
	GrapeSMv01_01g0972	0.607	0.83	0.423	TOR1L4
	GrapeSMv01_01g0973	25.617	58.767	20.57	RCOM_0699480
	GrapeSMv01_01g0974	4.043	6.843	9.913	CCB4
	GrapeSMv01_01g0975	15.637	15	43.917	KUA1
	GrapeSMv01_01g0976	1.063	1.313	2.19	--
	GrapeSMv01_01g0977	6.587	4.173	3.51	At1g27190
	GrapeSMv01_01g0978	25.233	15.427	18.293	--
	GrapeSMv01_01g0979	121.507	101.79	100.29	PP2A
	GrapeSMv01_01g0980	8.287	1.797	3.113	CLE25
	GrapeSMv01_01g0981	0.313	0	0.107	5FCL
	GrapeSMv01_01g0982	0.053	0.14	0.103	--
	GrapeSMv01_01g0983	1.37	0.423	0.403	RPV1
	GrapeSMv01_01g0984	2.753	0.573	0.393	RPV1
	GrapeSMv01_01g0985	1.367	1.95	2.963	RPV1
	GrapeSMv01_01g0986	20.417	17.907	25.887	SHW1
	GrapeSMv01_01g0987	4.153	0.817	0.797	BHLH094
	GrapeSMv01_01g0988	0.06	0	0	--
	GrapeSMv01_01g0989	11.117	12.947	8.06	--
	GrapeSMv01_01g0990	0.06	0.077	0.037	EXO84A
	GrapeSMv01_01g0991	1.92	0.55	0.707	GALT6
	GrapeSMv01_01g0992	2.94	1.433	1.37	--
	GrapeSMv01_01g0993	2.55	0.603	0.783	At1g05670
	GrapeSMv01_01g0994	9.157	3.17	6.363	GLCAT14A
	GrapeSMv01_01g0995	17.933	9.947	17.25	HIPL1
	GrapeSMv01_01g0996	0	0	0	GSTU17
	GrapeSMv01_01g0997	71.233	70.583	272.847	GSTU17
	GrapeSMv01_01g0998	0	0	0	GSTU18
	GrapeSMv01_01g0999	5.727	2.777	3.19	GSTU17
	GrapeSMv01_01g1000	0.14	0.093	0	AVP1
	GrapeSMv01_01g1001	0.363	1.08	0.21	LRK10L-1.5
	GrapeSMv01_01g1002	0	0	0	--
	GrapeSMv01_01g1003	94.66	65.827	27.857	--
	GrapeSMv01_01g1004	0	0	0	--
	GrapeSMv01_01g1005	3.147	0.687	0.77	PCMP-H51
	GrapeSMv01_01g1006	19.76	10.053	10.107	DNAJB1
	GrapeSMv01_01g1007	490.163	265.69	174.283	TRX2
	GrapeSMv01_01g1008	28.25	22.14	25.957	--
	GrapeSMv01_01g1009	8.15	8.46	5.807	AMPD
	GrapeSMv01_01g1010	1.267	1.83	5.887	NPF2.13
	GrapeSMv01_01g1011	18.157	28.92	26.957	PTST2
	GrapeSMv01_01g1012	3.873	1.907	1.86	HERC1
	GrapeSMv01_01g1013	34.92	19.653	23.26	At1g27050
	GrapeSMv01_01g1014	5.78	1.937	1.863	--
	GrapeSMv01_01g1015	20.89	61.6	65.153	HOX16
	GrapeSMv01_01g1016	2.557	0.877	1.06	--
	GrapeSMv01_01g1017	3.28	1.167	1.133	PCMP-H14
	GrapeSMv01_01g1018	19.45	41.143	20.287	NPF4.6
	GrapeSMv01_01g1019	0.133	0.403	0.273	GLOX
	GrapeSMv01_01g1020	39.883	95.85	105.99	TLP1
	GrapeSMv01_01g1021	11.573	8.35	7.723	--
	GrapeSMv01_01g1022	7.1	4.287	5.3	--
	GrapeSMv01_01g1023	0	0	0	METE
	GrapeSMv01_01g1024	27.063	35.86	34.71	PIX7
	GrapeSMv01_01g1025	89.403	127.157	70.71	--
	GrapeSMv01_01g1026	0	0	0	--
	GrapeSMv01_01g1027	0.32	2.38	0.38	-
	GrapeSMv01_01g1028	294.383	188.567	158.943	HIR2
	GrapeSMv01_01g1029	117.19	139.037	124.4	POR1
	GrapeSMv01_01g1030	0	0	0	--
	GrapeSMv01_01g1031	66.55	87.137	93.62	AMY3
	GrapeSMv01_01g1032	0.11	0	0.017	LAT59
	GrapeSMv01_01g1033	0	0	0	LAT59
	GrapeSMv01_01g1034	0	0.437	0.21	WRI1
	GrapeSMv01_01g1035	81.437	87.533	79.743	--
	GrapeSMv01_01g1036	0	0	0	--
	GrapeSMv01_01g1037	0	0	0	--
	GrapeSMv01_01g1038	5.29	9.023	16.627	--
	GrapeSMv01_01g1039	12.873	17.09	15.753	WHY1
	GrapeSMv01_01g1040	52.187	33.98	31.053	WRKY72A
	GrapeSMv01_01g1041	0.17	0.42	0.293	CBSCBS2
	GrapeSMv01_01g1042	0.647	0.37	0.503	PCMP-E22
	GrapeSMv01_01g1043	0	0	0	--
	GrapeSMv01_01g1044	0	0	0	-
	GrapeSMv01_01g1045	97.627	69.513	78.727	UBC2
	GrapeSMv01_01g1046	1.2	0.423	0.76	At1g14390
	GrapeSMv01_01g1047	5.403	1.71	1.74	IQD31
	GrapeSMv01_01g1048	0.553	1.12	1.147	-
	GrapeSMv01_01g1049	4.363	6.69	10.317	--
	GrapeSMv01_01g1050	0.173	0.19	0.17	CDT1A
	GrapeSMv01_01g1051	2.78	3.4	1.603	--
	GrapeSMv01_01g1052	0	0	0	DPBF3
	GrapeSMv01_01g1053	0	0	0	--
	GrapeSMv01_01g1054	0.52	0.383	0.697	DPBF3
	GrapeSMv01_01g1055	6.147	8.437	16.487	--
	GrapeSMv01_01g1056	11.83	14.003	12.167	WHY1
	GrapeSMv01_01g1057	57.207	27.3	19.477	WRKY72A
	GrapeSMv01_01g1058	0.38	0.313	0.13	CBSCBS2
	GrapeSMv01_01g1059	0.407	0.29	0.497	PCMP-E22
	GrapeSMv01_01g1060	74.923	54.823	56.293	UBC2
	GrapeSMv01_01g1061	0.107	0.283	0.217	At1g14390
	GrapeSMv01_01g1062	4.377	1.33	1.487	IQD31
	GrapeSMv01_01g1063	0	0	0.077	-
	GrapeSMv01_01g1064	0	0	0	SPL12
	GrapeSMv01_01g1065	0	0	0	pvaA
	GrapeSMv01_01g1066	51.827	52.85	63.86	VPS29
	GrapeSMv01_01g1067	0	0.027	0	PBL3
	GrapeSMv01_01g1068	166.433	76.303	83.967	PBL3
	GrapeSMv01_01g1069	83.017	18.203	10.853	UTR3
	GrapeSMv01_01g1070	2.293	0.887	0.777	MYB88
	GrapeSMv01_01g1071	28.04	30.45	63.723	--
	GrapeSMv01_01g1072	1.473	0.307	0.257	ATHB-13
	GrapeSMv01_01g1073	58.957	42.473	41.763	SUC3
	GrapeSMv01_01g1074	22.147	20.733	22.347	PRE6
	GrapeSMv01_01g1075	10.663	6.483	5.133	CYP23
	GrapeSMv01_01g1076	114.573	85	26.073	SKIP11
	GrapeSMv01_01g1077	44.72	122.657	40.64	--
	GrapeSMv01_01g1078	69.733	34.48	36.557	RPS9C
	GrapeSMv01_01g1079	2.7	2.123	1.643	EB1B
	GrapeSMv01_01g1080	0	0	0	--
	GrapeSMv01_01g1081	2.593	1.403	1.057	PCMP-E54
	GrapeSMv01_01g1082	1.117	2.48	1.27	PRAF1
	GrapeSMv01_01g1083	18.05	5.383	2.25	HVA22A
	GrapeSMv01_01g1084	5.247	4.693	9.24	TCP15
	GrapeSMv01_01g1085	10.653	11.147	10.847	--
	GrapeSMv01_01g1086	22.647	18.297	17.01	CUL3A
	GrapeSMv01_01g1087	3.853	2.383	2.33	MTH_209
	GrapeSMv01_01g1088	4.71	1.417	1.957	--
	GrapeSMv01_01g1089	0.273	0.333	0.2	--
	GrapeSMv01_01g1090	16.69	7.947	9.033	hgh1
	GrapeSMv01_01g1091	1.9	0.983	1.433	OsI_26966
	GrapeSMv01_01g1092	0	0	0.043	ndhA
	GrapeSMv01_01g1093	48.317	46.427	41.027	SBH1
	GrapeSMv01_01g1094	0.84	0.04	0.133	PKS1
	GrapeSMv01_01g1095	23.817	6.993	3.55	At1g26850
	GrapeSMv01_01g1096	25.03	14.34	23.383	--
	GrapeSMv01_01g1097	0	0	0	FEZ
	GrapeSMv01_01g1098	0.21	0	0.053	EIX2
	GrapeSMv01_01g1099	0.037	0.067	0.2	GSTU10
	GrapeSMv01_01g1100	0.177	0.563	0.193	GSTU10
	GrapeSMv01_01g1101	0	0	0	GSTU10
	GrapeSMv01_01g1102	75.177	57.297	61.077	RPL34
	GrapeSMv01_01g1103	15.973	8.88	13.7	--
	GrapeSMv01_01g1104	53.63	24.627	35.15	--
	GrapeSMv01_01g1105	7.78	3.387	3.317	MEE12
	GrapeSMv01_01g1106	0	0	0	MIF2
	GrapeSMv01_01g1107	5.63	4.353	5.78	ZHD11
	GrapeSMv01_01g1108	0.8	0.68	0.65	--
	GrapeSMv01_01g1109	74.397	43.983	28.657	--
	GrapeSMv01_01g1110	0.8	1.08	0.487	--
	GrapeSMv01_01g1111	429.85	557.433	836.717	CP12-1
	GrapeSMv01_01g1112	66.327	68.203	55.253	APY6
	GrapeSMv01_01g1113	2.25	1.507	2.73	AVT1I
	GrapeSMv01_01g1114	3.56	2.973	2.77	PCMP-H26
	GrapeSMv01_01g1115	7.407	19.73	3.843	RNS1
	GrapeSMv01_01g1116	8.12	4.313	3.307	GALT1
	GrapeSMv01_01g1117	14.64	50.15	56.267	--
	GrapeSMv01_01g1118	9.343	5.543	6.187	PHL8
	GrapeSMv01_01g1119	7.63	30.023	37.567	CDF3
	GrapeSMv01_01g1120	2.207	6.283	2.55	CML45
	GrapeSMv01_01g1121	0	0	0	MYB105
	GrapeSMv01_01g1122	0.037	0	0	--
	GrapeSMv01_01g1123	2.493	1.203	1.043	EXPA10
	GrapeSMv01_01g1124	0	0	0	--
	GrapeSMv01_01g1125	8.753	7.203	5.7	GCH1
	GrapeSMv01_01g1126	1.413	1.077	0.783	GCH1
	GrapeSMv01_01g1127	9.31	2.673	4.04	METTL7A
	GrapeSMv01_01g1128	43.387	55.813	67.83	RCF3
	GrapeSMv01_01g1129	7.577	7.47	6.08	--
	GrapeSMv01_01g1130	6.243	7.607	12.077	PNSL2
	GrapeSMv01_01g1131	5.277	5.053	3.41	mpo1
	GrapeSMv01_01g1132	0	0.333	0.05	CYP704B1
	GrapeSMv01_01g1133	38.043	118.533	113.1	NAP2
	GrapeSMv01_01g1134	29.127	26.917	22.277	RSA1
	GrapeSMv01_01g1135	11.887	9.507	9.333	APC2
	GrapeSMv01_01g1136	22.793	39.063	76.347	--
	GrapeSMv01_01g1137	2.887	2.883	3.233	PUMP3
	GrapeSMv01_01g1138	0	0	0	MYB106
	GrapeSMv01_01g1139	0	0	0	PRT6
	GrapeSMv01_01g1140	0	0	0	LOS1
	GrapeSMv01_01g1141	0.083	0.027	0.013	--
	GrapeSMv01_01g1142	5.553	1.49	1.607	--
	GrapeSMv01_01g1143	42.077	36.567	38.183	--
	GrapeSMv01_01g1144	0	0	0	FT1
	GrapeSMv01_01g1145	0	0	0	PHO1;H3
	GrapeSMv01_01g1146	1.05	0.117	1.977	PHO1;H3
	GrapeSMv01_01g1147	0.03	0.02	0	PHO1;H3
	GrapeSMv01_01g1148	0	0	0	-
	GrapeSMv01_01g1149	0	0	0	--
	GrapeSMv01_01g1150	0	0	0	--
	GrapeSMv01_01g1151	18.527	12.053	11.36	RPN6
	GrapeSMv01_01g1152	0	0	0	PHO1;H3
	GrapeSMv01_01g1153	9.547	9.267	16.497	LSMT-L
	GrapeSMv01_01g1154	12.65	9.93	10.877	RRT4
	GrapeSMv01_01g1155	20.977	16.69	10.637	At1g26690
	GrapeSMv01_01g1156	18.887	18.77	17.677	ILK1
	GrapeSMv01_01g1157	47.833	38.87	41.55	ILK1
	GrapeSMv01_01g1158	84.357	109.99	61.227	--
	GrapeSMv01_01g1159	60.163	62.803	62.36	VTI12
	GrapeSMv01_01g1160	0	0	0	-
	GrapeSMv01_01g1161	0.03	0	0	TRS130
	GrapeSMv01_01g1162	0.007	0	0	AGO7
	GrapeSMv01_01g1163	0	0	0	FANCM
	GrapeSMv01_01g1164	2.487	0.19	0.573	--
	GrapeSMv01_01g1165	0	0	0	-
	GrapeSMv01_01g1166	0	0	0	FQR1
	GrapeSMv01_01g1167	8.77	3.58	4.417	--
	GrapeSMv01_01g1168	18.923	16.17	17.6	BUB3.3
	GrapeSMv01_01g1169	3.227	2.06	2.343	PAT22
	GrapeSMv01_01g1170	0	0	0	--
	GrapeSMv01_01g1171	0	0	0	--
	GrapeSMv01_01g1172	0	0	0	-
	GrapeSMv01_01g1173	0	0	0	-
	GrapeSMv01_01g1174	0	0	0	GAUT14
	GrapeSMv01_01g1175	14.357	9.223	9.75	WRKY3
	GrapeSMv01_01g1176	0	0	0	--
	GrapeSMv01_01g1177	14.043	12.903	14.263	MINE1
	GrapeSMv01_01g1178	0	0	0	--
	GrapeSMv01_01g1179	0	0.167	0.153	--
	GrapeSMv01_01g1180	0	0	0	--
	GrapeSMv01_01g1181	0	0	0	--
	GrapeSMv01_01g1182	0	0	0	--
	GrapeSMv01_01g1183	0	0.2	0.223	--
	GrapeSMv01_01g1184	0	0	0	XI-A
	GrapeSMv01_01g1185	17.853	11.063	11.57	IPK
	GrapeSMv01_01g1186	57.333	130.177	127.593	PCAP1
	GrapeSMv01_01g1187	0	0	0	--
	GrapeSMv01_01g1188	0	0	0	--
	GrapeSMv01_01g1189	0.56	0.097	0.163	guaA
	GrapeSMv01_01g1190	29.293	17.833	11.91	GALS3
	GrapeSMv01_01g1191	0	0	0	CYP40
	GrapeSMv01_01g1192	0	0	0	CYP40
	GrapeSMv01_01g1193	0	0	0	P85
	GrapeSMv01_01g1194	0	0	0	At3g51250
	GrapeSMv01_01g1195	0	0	0	-
	GrapeSMv01_01g1196	0	0	0	-
	GrapeSMv01_01g1197	0	0	0	-
	GrapeSMv01_01g1198	0	0	0	CHR12
	GrapeSMv01_01g1199	0	0	0.037	CSI3
	GrapeSMv01_01g1200	0	0	0	APY1
	GrapeSMv01_01g1201	0	0	0	PCMP-H16
	GrapeSMv01_01g1202	23.697	3.263	5.957	ctps1
	GrapeSMv01_01g1203	0	0	0	-
	GrapeSMv01_01g1204	0	0	0	--
	GrapeSMv01_01g1205	0.163	0	0	--
	GrapeSMv01_01g1206	3.717	1.207	0.537	BAM3
	GrapeSMv01_01g1207	0.51	0.397	0.47	Neurl1b
	GrapeSMv01_01g1208	0.06	0.057	0.03	GSO1
	GrapeSMv01_01g1209	0	0	0	At5g64030
	GrapeSMv01_01g1210	0	0	0	At5g64030
	GrapeSMv01_01g1211	0	0	0	PER7
	GrapeSMv01_01g1212	0.893	0.367	0.237	--
	GrapeSMv01_01g1213	5.523	3.373	4.173	--
	GrapeSMv01_01g1214	0	0	0	MYB86
	GrapeSMv01_01g1215	0	0.02	0	MUCI21
	GrapeSMv01_01g1216	0	0	0	CM3
	GrapeSMv01_01g1217	0	0	0	--
	GrapeSMv01_01g1218	0.157	0.037	0	-
	GrapeSMv01_01g1219	0	0	0	--
	GrapeSMv01_01g1220	0	0	0	CM3
	GrapeSMv01_01g1221	3.717	0.957	0.973	At5g01610
	GrapeSMv01_01g1222	2.957	2.473	3.123	--
	GrapeSMv01_01g1223	1.577	2.6	1.363	UGT82A1
	GrapeSMv01_01g1224	0	0	0	--
	GrapeSMv01_01g1225	15.86	9.953	9.727	BIM2
	GrapeSMv01_01g1226	6.41	5.04	3.553	PREPL
	GrapeSMv01_01g1227	8.637	7.31	8.113	ptrB
	GrapeSMv01_01g1228	16.123	25.267	15.197	--
	GrapeSMv01_01g1229	8.22	4.23	4.073	TSNAX
	GrapeSMv01_01g1230	8.403	4.14	5.913	NOL
	GrapeSMv01_01g1231	13.707	35.487	34.643	PI4KG7
	GrapeSMv01_01g1232	0.017	0	0	tag
	GrapeSMv01_01g1233	4.163	2.97	3.743	At1g13630
	GrapeSMv01_01g1234	0	0	0	--
	GrapeSMv01_01g1235	0.413	0.767	0.42	-
	GrapeSMv01_01g1236	0.477	0.647	0.357	--
	GrapeSMv01_01g1237	2.587	1.883	3.17	At1g33811
	GrapeSMv01_01g1238	0	0	0	--
	GrapeSMv01_01g1239	0.017	0.013	0.017	ABHD17B
	GrapeSMv01_01g1240	145.413	85.44	122.16	HSP90-5
	GrapeSMv01_01g1241	48.13	30.33	44.477	HSP90-5
	GrapeSMv01_01g1242	0	0	0	ROPGAP6
	GrapeSMv01_01g1243	0	0	0	ROPGAP6
	GrapeSMv01_01g1244	12.737	5.607	9.09	RPOT1
	GrapeSMv01_01g1245	11.47	6.343	4.757	PUB42
	GrapeSMv01_01g1246	0.4	0.163	0.17	PRXL2A
	GrapeSMv01_01g1247	1.58	0.413	0.82	PCMP-H22
	GrapeSMv01_01g1248	5.33	2.127	2.783	BHLH49
	GrapeSMv01_01g1249	10.837	14.73	28.437	WIT2
	GrapeSMv01_01g1250	0.843	0.553	0	--
	GrapeSMv01_01g1251	1.04	0.45	0.193	--
	GrapeSMv01_01g1252	26.123	5.283	3.923	--
	GrapeSMv01_01g1253	0.217	0.157	0.083	--
	GrapeSMv01_01g1254	0	0.023	0.05	--
	GrapeSMv01_01g1255	0	0	0	TEF1
	GrapeSMv01_01g1256	0	0	0	-
	GrapeSMv01_01g1257	0	0	0	TEF1
	GrapeSMv01_01g1258	0	0	0	--
	GrapeSMv01_01g1259	0.55	0.53	0.223	--
	GrapeSMv01_01g1260	1.917	1.093	0.393	--
	GrapeSMv01_01g1261	0.103	0	0	--
	GrapeSMv01_01g1262	1.753	1.247	1.62	PHYLLO
	GrapeSMv01_01g1263	0	0	0	guaA
	GrapeSMv01_01g1264	2.51	6.19	22.093	CPN60B4
	GrapeSMv01_01g1265	0.06	0.057	0.083	NPF6.2
	GrapeSMv01_01g1266	0	0	0	-
	GrapeSMv01_01g1267	0	0	0	BZIP43
	GrapeSMv01_01g1268	4.16	1.857	7.317	At3g19800
	GrapeSMv01_01g1269	77.523	33.437	35.94	AAPT1
	GrapeSMv01_01g1270	0	0	0	PER48
	GrapeSMv01_01g1271	0.797	0.533	0.577	--
	GrapeSMv01_01g1272	49.913	43.263	45.027	SAMDC
	GrapeSMv01_01g1273	0	0	0	--
	GrapeSMv01_01g1274	7.353	5.143	5.867	NIK1
	GrapeSMv01_01g1275	3.5	1.15	1.793	At1g13570
	GrapeSMv01_01g1276	4.277	2.97	1.993	At1g13570
	GrapeSMv01_01g1277	0	0	0	TULP3
	GrapeSMv01_01g1278	0	0.13	0.12	At2g05300
	GrapeSMv01_01g1279	0.867	0.977	0.517	TTM2
	GrapeSMv01_01g1280	6.543	5.44	5.31	--
	GrapeSMv01_01g1281	17.273	12.037	10.037	At1g13580
	GrapeSMv01_01g1282	0	0	0.037	--
	GrapeSMv01_01g1283	117.17	64.133	50.283	PGD2
	GrapeSMv01_01g1284	0.007	0	0.007	-
	GrapeSMv01_01g1285	0	0	0	--
	GrapeSMv01_01g1286	0	0	0	--
	GrapeSMv01_01g1287	2.413	0.747	1.117	SNAT2
	GrapeSMv01_01g1288	0	0	0	-
	GrapeSMv01_01g1289	0	0	0	--
	GrapeSMv01_01g1290	0	0	0	UNE12
	GrapeSMv01_01g1291	8.13	6.08	5.89	PAT11
	GrapeSMv01_01g1292	9.103	5.627	6.307	CCB3
	GrapeSMv01_01g1293	37.637	37.167	6.98	DIM
	GrapeSMv01_01g1294	1.303	1.303	1.043	UNG
	GrapeSMv01_01g1295	9.787	14.237	16.213	--
	GrapeSMv01_01g1296	0	0	0	--
	GrapeSMv01_01g1297	12.777	7.103	8.813	PUB62
	GrapeSMv01_01g1298	0	0	0	CYP82A3
	GrapeSMv01_01g1299	0	0	0	--
	GrapeSMv01_01g1300	0.283	0.627	0.47	CHR5
	GrapeSMv01_01g1301	0	0	0	RNS1
	GrapeSMv01_01g1302	31.3	20.587	12.823	OsI_033149
	GrapeSMv01_01g1303	4.49	3.213	3.637	--
	GrapeSMv01_01g1304	0	0	0	--
	GrapeSMv01_01g1305	0	0	0	--
	GrapeSMv01_01g1306	0	0	0	--
	GrapeSMv01_01g1307	0	0	0.013	--
	GrapeSMv01_01g1308	0	0	0	--
	GrapeSMv01_01g1309	6.25	11.71	10.667	--
	GrapeSMv01_01g1310	2.053	7.61	29.437	CPN60B4
	GrapeSMv01_01g1311	0.057	0	0.057	-
	GrapeSMv01_01g1312	0	0	0	BZIP43
	GrapeSMv01_01g1313	16.673	15.773	28.31	At3g19800
	GrapeSMv01_01g1314	60.337	22.75	27.693	AAPT1
	GrapeSMv01_01g1315	0.167	0.053	0.093	PER48
	GrapeSMv01_01g1316	0.573	0.757	0.57	--
	GrapeSMv01_01g1317	61.227	55.92	51.98	SAMDC
	GrapeSMv01_01g1318	8.063	6.927	6.827	NIK1
	GrapeSMv01_01g1319	4.157	2.673	2.21	At1g13570
	GrapeSMv01_01g1320	2.653	1.453	1.173	At1g13570
	GrapeSMv01_01g1321	0	0	0	--
	GrapeSMv01_01g1322	0	0	0	TULP3
	GrapeSMv01_01g1323	0	0	0	-
	GrapeSMv01_01g1324	0	0.033	0	At2g05300
	GrapeSMv01_01g1325	0.727	0.653	0.557	TTM2
	GrapeSMv01_01g1326	5.45	3.497	2.99	--
	GrapeSMv01_01g1327	19.567	13.867	11.56	At1g13580
	GrapeSMv01_01g1328	0	0	0	--
	GrapeSMv01_01g1329	150.913	83.62	73.183	PGD2
	GrapeSMv01_01g1330	0	0	0	ycf2-A
	GrapeSMv01_01g1331	2.897	0.927	2.84	SNAT2
	GrapeSMv01_01g1332	0	0	0	-
	GrapeSMv01_01g1333	0	0	0	--
	GrapeSMv01_01g1334	0	0	0	--
	GrapeSMv01_01g1335	0	0	0	--
	GrapeSMv01_01g1336	0	0	0	--
	GrapeSMv01_01g1337	7.203	4.483	3.987	PAT11
	GrapeSMv01_01g1338	5.82	4.003	4.98	CCB3
	GrapeSMv01_01g1339	73.997	48.9	18.86	VIT_01s0010g01180
	GrapeSMv01_01g1340	3.063	1.67	1.283	DIM
	GrapeSMv01_01g1341	0.963	1.04	0.8	UNG
	GrapeSMv01_01g1342	25.92	28.46	32.48	--
	GrapeSMv01_01g1343	0	0	0	-
	GrapeSMv01_01g1344	12.68	8.49	9.39	PUB62
	GrapeSMv01_01g1345	0	0	0	RNS1
	GrapeSMv01_01g1346	0	0	0	CYP21-2
	GrapeSMv01_01g1347	0	0.07	0	--
	GrapeSMv01_01g1348	0	0	0	--
	GrapeSMv01_01g1349	40.693	26.463	12.57	OsI_033149
	GrapeSMv01_01g1350	2.977	2.253	2.587	--
	GrapeSMv01_01g1351	0	0	0	--
	GrapeSMv01_01g1352	0	0.013	0	--
	GrapeSMv01_01g1353	1.013	0.273	0.423	--
	GrapeSMv01_01g1354	0	0	0	--
	GrapeSMv01_01g1355	0	0	0	LPEAT1
	GrapeSMv01_01g1356	6.58	4.677	6.45	--
	GrapeSMv01_01g1357	0.147	0.06	0.043	At3g19850
	GrapeSMv01_01g1358	15.927	13.26	14.867	TAF15
	GrapeSMv01_01g1359	0	0	0	ARF1
	GrapeSMv01_01g1360	146.877	52.52	48.697	--
	GrapeSMv01_01g1361	13.627	15.083	16.463	PRP40C
	GrapeSMv01_01g1362	4.633	5.36	5.883	Ap5b1
	GrapeSMv01_01g1363	5.107	2.083	3.553	At1g80150
	GrapeSMv01_01g1364	0	0	0	--
	GrapeSMv01_01g1365	9.48	7.917	9.76	AGD4
	GrapeSMv01_01g1366	0	0	0	AGL62
	GrapeSMv01_01g1367	0	0	0	--
	GrapeSMv01_01g1368	0	0	0	AGL62
	GrapeSMv01_01g1369	0	0	0	LHT1
	GrapeSMv01_01g1370	0.38	0.183	0.167	PCMP-H61
	GrapeSMv01_01g1371	16.227	12.173	14.39	--
	GrapeSMv01_01g1372	5.237	8.403	7.513	--
	GrapeSMv01_01g1373	1	0.153	0	GA2OX6
	GrapeSMv01_01g1374	0.17	0.017	0.123	At1g60630
	GrapeSMv01_01g1375	0.403	0.627	0.537	TIPIN
	GrapeSMv01_01g1376	30.663	51.243	29.74	--
	GrapeSMv01_01g1377	0	0	0	--
	GrapeSMv01_01g1378	13.78	13.657	11.953	PSKR
	GrapeSMv01_01g1379	38.883	24.03	19.56	AKR4C10
	GrapeSMv01_01g1380	14.41	11.46	9.643	TOM3
	GrapeSMv01_01g1381	1.883	0.813	0.88	--
	GrapeSMv01_01g1382	57.163	48.85	41.183	At2g02160
	GrapeSMv01_01g1383	0.09	0	0.1	--
	GrapeSMv01_01g1384	3.11	1.633	2.107	At2g02150
	GrapeSMv01_01g1385	15.167	11.4	10.863	CYCL1-1
	GrapeSMv01_01g1386	6.42	3.847	4.61	At2g02148
	GrapeSMv01_01g1387	27.167	11.743	13.51	SG1
	GrapeSMv01_01g1388	1.287	0.887	0.603	--
	GrapeSMv01_01g1389	47.713	51.617	37.3	At5g13200
	GrapeSMv01_01g1390	11.263	3.137	4.253	Trank1
	GrapeSMv01_01g1391	0	0	0	GDPD5
	GrapeSMv01_01g1392	2.137	0.35	0.263	TRANK1
	GrapeSMv01_01g1393	0.783	0.097	0.19	TRANK1
	GrapeSMv01_01g1394	2.99	0.693	7.587	VIT_01s0010g01870
	GrapeSMv01_01g1395	17.327	16.65	17.25	RH10
	GrapeSMv01_01g1396	0	0	0	RWA1
	GrapeSMv01_01g1397	3.78	2.873	9.65	At5g13770
	GrapeSMv01_01g1398	0	0	0	NFYB5
	GrapeSMv01_01g1399	0	0	0	GSVIVT00023967001
	GrapeSMv01_01g1400	0	0	0	NFYB5
	GrapeSMv01_01g1401	0	0	0	PER5
	GrapeSMv01_01g1402	0	0	0	PER5
	GrapeSMv01_01g1403	0	0	0	PER5
	GrapeSMv01_01g1404	0.077	0.563	0.11	PER5
	GrapeSMv01_01g1405	0.113	0.04	0.043	PNC1
	GrapeSMv01_01g1406	0	0.207	0.04	PER5
	GrapeSMv01_01g1407	0	0	0	--
	GrapeSMv01_01g1408	147.997	67.16	76.167	PDF2.2
	GrapeSMv01_01g1409	0.067	0	0	--
	GrapeSMv01_01g1410	14.41	13.067	18.543	PUX7
	GrapeSMv01_01g1411	0	0	0	DTX45
	GrapeSMv01_01g1412	0.58	0.487	1.913	BHLH111
	GrapeSMv01_01g1413	0	0	0	--
	GrapeSMv01_01g1414	29.91	20.493	24.037	ETL1
	GrapeSMv01_01g1415	39.103	18.783	21.463	IDD4
	GrapeSMv01_01g1416	12.997	13.207	18.913	IDD5
	GrapeSMv01_01g1417	0	0	0	CYP40
	GrapeSMv01_01g1418	0	0	0	APL2
	GrapeSMv01_01g1419	0	0	0	--
	GrapeSMv01_01g1420	13.737	12.193	16.973	ARC3
	GrapeSMv01_01g1421	2.127	1.01	1.32	At4g15970
	GrapeSMv01_01g1422	17.867	5.427	5.223	RGS1
	GrapeSMv01_01g1423	17.237	11.41	12.163	--
	GrapeSMv01_01g1424	0.427	0.323	0.613	--
	GrapeSMv01_01g1425	0.607	0.443	0.243	--
	GrapeSMv01_01g1426	9.593	7.587	6.023	--
	GrapeSMv01_01g1427	0.123	0.203	0.063	At3g48460
	GrapeSMv01_01g1428	3.387	5.02	2.43	AIRP2
	GrapeSMv01_01g1429	16.18	9.043	7.757	At1g67720
	GrapeSMv01_01g1430	3.24	2.657	1.407	AIRP2
	GrapeSMv01_01g1431	7.917	2.917	2.98	RR26
	GrapeSMv01_01g1432	0.327	0.22	0.17	WDL7
	GrapeSMv01_01g1433	31.54	25.69	18.473	CXE16
	GrapeSMv01_01g1434	0.8	0.633	0.51	RAM1
	GrapeSMv01_01g1435	64.877	118.373	179.34	HHL1
	GrapeSMv01_01g1436	0.06	0	0	CYP71P1
	GrapeSMv01_01g1437	0.047	0.047	0.023	CYP71P1
	GrapeSMv01_01g1438	5.387	5.003	6.43	HSP22
	GrapeSMv01_01g1439	0	0	0	SALAT
	GrapeSMv01_01g1440	0	0	0	rpl23-A
	GrapeSMv01_01g1441	0	0	0	SAT
	GrapeSMv01_01g1442	0	0	0	-
	GrapeSMv01_01g1443	0	0	0	BIA1
	GrapeSMv01_01g1444	0	0	0	SAT
	GrapeSMv01_01g1445	0	0	0	-
	GrapeSMv01_01g1446	0.123	0.147	0	ACT
	GrapeSMv01_01g1447	0	0	0	--
	GrapeSMv01_01g1448	2.987	1.177	1.057	SAT
	GrapeSMv01_01g1449	34.613	20.453	19.487	B'ETA
	GrapeSMv01_01g1450	2.787	1.857	2.327	At1g67690
	GrapeSMv01_01g1451	3.66	2.313	3.047	At1g67690
	GrapeSMv01_01g1452	37.583	24.42	25.803	SRP72
	GrapeSMv01_01g1453	23.277	38.6	37.41	SKIP14
	GrapeSMv01_01g1454	80.173	51.09	80.527	PTAC7
	GrapeSMv01_01g1455	0	0	0	--
	GrapeSMv01_01g1456	2.53	2.63	4.037	--
	GrapeSMv01_01g1457	5.243	2.26	4.757	--
	GrapeSMv01_01g1458	0	0	0	--
	GrapeSMv01_01g1459	14.49	20.15	12.533	GT-1
	GrapeSMv01_01g1460	2.33	0.71	0.693	MAD2
	GrapeSMv01_01g1461	34.577	14.22	26.447	ABCC3
	GrapeSMv01_01g1462	13.783	13.177	3.943	--
	GrapeSMv01_01g1463	0	0	0	TUBB1
	GrapeSMv01_01g1464	57.603	107.28	63.173	GAPC2
	GrapeSMv01_01g1465	2.673	1.16	1.333	At3g04130
	GrapeSMv01_01g1466	6.993	8.357	9.253	--
	GrapeSMv01_01g1467	0	0.07	0.017	LHT1
	GrapeSMv01_01g1468	0	0	0	-
	GrapeSMv01_01g1469	0	0	0	LHT1
	GrapeSMv01_01g1470	3.017	2.203	1.78	--
	GrapeSMv01_01g1471	0.567	0.663	0.14	--
	GrapeSMv01_01g1472	83.843	72.393	60.647	CDKG-2
	GrapeSMv01_01g1473	0.037	0.103	0.05	--
	GrapeSMv01_01g1474	3.183	1.173	1.693	--
	GrapeSMv01_01g1475	5.033	1.747	2.857	SCO5321
	GrapeSMv01_01g1476	18.023	35.483	11.203	yuiD
	GrapeSMv01_01g1477	0.223	0.177	0.1	RECQL5
	GrapeSMv01_01g1478	12.97	10.257	8.677	CDC48C
	GrapeSMv01_01g1479	21.38	15.893	16.83	--
	GrapeSMv01_01g1480	9.683	7.073	7.363	At1g67620
	GrapeSMv01_01g1481	0	0	0	--
	GrapeSMv01_01g1482	1.837	0.48	0.863	--
	GrapeSMv01_01g1483	0.127	0.067	0.017	LHT2
	GrapeSMv01_01g1484	0	0.03	0	--
	GrapeSMv01_01g1485	0	0	0	--
	GrapeSMv01_01g1486	6.817	2.717	2.41	CLKR27
	GrapeSMv01_01g1487	0	4.373	0.133	At5g14285
	GrapeSMv01_01g1488	0.527	0.537	0.673	POLA2
	GrapeSMv01_01g1489	0	0	0	LHT1
	GrapeSMv01_01g1490	0.067	0	0	--
	GrapeSMv01_01g1491	0	0	0	--
	GrapeSMv01_01g1492	1.073	0.26	0.39	At3g50940
	GrapeSMv01_01g1493	3.453	0.787	0.907	4CLL9
	GrapeSMv01_01g1494	7.537	6.043	3.43	LOX6
	GrapeSMv01_01g1495	21.673	16.42	15.15	URE
	GrapeSMv01_01g1496	27.477	10.987	6.787	ADK-B
	GrapeSMv01_01g1497	0	0	0.147	--
	GrapeSMv01_01g1498	12.1	10.133	13.44	At1g27900
	GrapeSMv01_01g1499	0.067	0	0	--
	GrapeSMv01_01g1500	6.333	4.457	4.26	--
	GrapeSMv01_01g1501	9.917	7.527	7.08	OTU4
	GrapeSMv01_01g1502	0	0	0	--
	GrapeSMv01_01g1503	0	0	0	At3g50940
	GrapeSMv01_01g1504	0.063	0	0	--
	GrapeSMv01_01g1505	5.24	0.923	0.803	At2g18193
	GrapeSMv01_01g1506	2.183	1.327	1.207	At2g18193
	GrapeSMv01_01g1507	0	0	0.04	At2g18193
	GrapeSMv01_01g1508	24.457	9.787	13.887	PUB45
	GrapeSMv01_01g1509	124.493	149.003	142.677	PBE2
	GrapeSMv01_01g1510	1.317	0.76	0.957	ZAR1
	GrapeSMv01_01g1511	27.313	26.057	28.397	CUV
	GrapeSMv01_01g1512	1.81	3.083	1.04	--
	GrapeSMv01_01g1513	0.41	1.3	0.353	--
	GrapeSMv01_01g1514	0.35	0.593	0.3	--
	GrapeSMv01_01g1515	0.3	1.3	0.117	--
	GrapeSMv01_01g1516	0.177	2.6	0.237	--
	GrapeSMv01_01g1517	0	0	0	--
	GrapeSMv01_01g1518	0.627	1.927	0.177	--
	GrapeSMv01_01g1519	0	0.057	0	CML19
	GrapeSMv01_01g1520	0.12	0.277	0.057	--
	GrapeSMv01_01g1521	1.507	3.077	0.64	--
	GrapeSMv01_01g1522	0.917	1.44	0.287	--
	GrapeSMv01_01g1523	0	0	0	--
	GrapeSMv01_01g1524	0	0	0	--
	GrapeSMv01_01g1525	1.77	0.787	0.923	--
	GrapeSMv01_01g1526	0	0	0	--
	GrapeSMv01_01g1527	0.313	0.547	0.11	--
	GrapeSMv01_01g1528	0	0	0	--
	GrapeSMv01_01g1529	0	0	0	RPOT2-SYL
	GrapeSMv01_01g1530	0	0	0	--
	GrapeSMv01_01g1531	0	0	0	AGT2
	GrapeSMv01_01g1532	0.62	0.573	0.403	GLB
	GrapeSMv01_01g1533	0.113	0	0	--
	GrapeSMv01_01g1534	0	0	0	--
	GrapeSMv01_01g1535	0	0	0	--
	GrapeSMv01_01g1536	0	0	0	RPOT2-SYL
	GrapeSMv01_01g1537	0	0	0	PMP22
	GrapeSMv01_01g1538	0	0	0	AGT2
	GrapeSMv01_01g1539	0	0	0	RPOT2-SYL
	GrapeSMv01_01g1540	0	0	0	PMP22
	GrapeSMv01_01g1541	28.52	16.963	14.467	GCS1
	GrapeSMv01_01g1542	18.897	9.07	17.093	NUP54
	GrapeSMv01_01g1543	16.76	29.213	54.647	At1g67480
	GrapeSMv01_01g1544	0.073	0	0.077	--
	GrapeSMv01_01g1545	0	0	0	At5g48900
	GrapeSMv01_01g1546	8.823	7.743	9.897	rsgA
	GrapeSMv01_01g1547	33.047	28.307	29.31	At2g22425
	GrapeSMv01_01g1548	38.58	13.233	18.92	RPL17B
	GrapeSMv01_01g1549	70.26	48.233	64.69	RPL17B
	GrapeSMv01_01g1550	16.227	8.857	10.463	ermp1
	GrapeSMv01_01g1551	12.09	5.643	6.47	ARAD1
	GrapeSMv01_01g1552	0	0	0	--
	GrapeSMv01_01g1553	0.9	0.447	0.69	At4g01570
	GrapeSMv01_01g1554	19.313	16.813	13.933	--
	GrapeSMv01_01g1555	0	0	0	--
	GrapeSMv01_01g1556	0	0	0	FAOMT
	GrapeSMv01_01g1557	0.02	0	0.02	At3g30340
	GrapeSMv01_01g1558	0	0	0	FAOMT
	GrapeSMv01_01g1559	0	0	0	--
	GrapeSMv01_01g1560	0.513	0.27	0.32	elmoA
	GrapeSMv01_01g1561	0.703	1.027	0.53	MAP65-8
	GrapeSMv01_01g1562	0.12	0	0.04	--
	GrapeSMv01_01g1563	0.44	0	0	--
	GrapeSMv01_01g1564	1.39	1.55	2.83	CYP78A4
	GrapeSMv01_01g1565	20.303	12.4	16.37	ctdspl2
	GrapeSMv01_01g1566	0.54	0.703	1.14	ASY1
	GrapeSMv01_01g1567	83.003	177.087	173.97	At1g67360
	GrapeSMv01_01g1568	18.58	15.31	15.277	--
	GrapeSMv01_01g1569	0	0	0	HSP70-1
	GrapeSMv01_01g1570	0	0	0	--
	GrapeSMv01_01g1571	0	0	0	RD19A
	GrapeSMv01_01g1572	0	0	0	--
	GrapeSMv01_01g1573	0	0	0	--
	GrapeSMv01_01g1574	0	0	0	RD19A
	GrapeSMv01_01g1575	0	0	0	--
	GrapeSMv01_01g1576	0	0	0	--
	GrapeSMv01_01g1577	0	0	0	--
	GrapeSMv01_01g1578	0	0	0.037	--
	GrapeSMv01_01g1579	341.777	219.43	459.84	CAB7
	GrapeSMv01_01g1580	11.803	8.13	10.2	At1g67340
	GrapeSMv01_01g1581	178.16	158.91	149.62	--
	GrapeSMv01_01g1582	8.273	7.413	9.15	At1g11780
	GrapeSMv01_01g1583	16.423	20.61	22.747	--
	GrapeSMv01_01g1584	1.093	2.533	1.787	--
	GrapeSMv01_01g1585	20.193	31.727	18.757	At1g27930
	GrapeSMv01_01g1586	18.43	0.577	3.18	LTPG1
	GrapeSMv01_01g1587	3.523	1.577	1.98	ECT4
	GrapeSMv01_01g1588	49.877	44.957	46.633	At1g67325
	GrapeSMv01_01g1589	1.29	0.763	0.907	SPL12
	GrapeSMv01_01g1590	0	0	0	4CLL1
	GrapeSMv01_01g1591	30.02	58.447	52.85	FBX6
	GrapeSMv01_01g1592	6.507	3.92	5.893	MTERF1
	GrapeSMv01_01g1593	68.827	43.63	19.777	--
	GrapeSMv01_01g1594	13.25	18.573	16.113	dnaJ
	GrapeSMv01_01g1595	1.533	2.14	2.137	--
	GrapeSMv01_01g1596	0.017	0	0.017	--
	GrapeSMv01_01g1597	64.093	93.27	118.673	AHK3
	GrapeSMv01_01g1598	105.393	88.73	83.747	NTF2B
	GrapeSMv01_01g1599	3.247	3.827	3.823	--
	GrapeSMv01_01g1600	0.16	0.277	0.257	GSO1
	GrapeSMv01_01g1601	3.003	2.24	2.593	--
	GrapeSMv01_01g1602	0	0	0	--
	GrapeSMv01_01g1603	0	0	0	-
	GrapeSMv01_01g1604	38.61	48.627	63.127	CAMTA4
	GrapeSMv01_01g1605	1.943	0.113	0.373	--
	GrapeSMv01_01g1606	1.59	0.407	0.747	--
	GrapeSMv01_01g1607	69.37	57.923	49.483	--
	GrapeSMv01_01g1608	61.113	41.72	58.727	AGL31
	GrapeSMv01_01g1609	0	0	0	--
	GrapeSMv01_01g1610	0	0	0	--
	GrapeSMv01_01g1611	0.017	0.1	0.017	MADS4
	GrapeSMv01_01g1612	0	0	0	--
	GrapeSMv01_01g1613	1.39	8.17	1.513	SPL13A
	GrapeSMv01_01g1614	52.703	31.733	32.143	--
	GrapeSMv01_01g1615	234.14	193.643	120.25	WRKY75
	GrapeSMv01_01g1616	29.117	74.183	23.49	DPL1
	GrapeSMv01_01g1617	4.817	4.577	6.777	PCMP-H11
	GrapeSMv01_01g1618	0.387	0.33	0.56	LA1
	GrapeSMv01_01g1619	0.133	0.04	0.387	--
	GrapeSMv01_01g1620	11.183	17.153	18.03	--
	GrapeSMv01_01g1621	0.087	0.027	0.09	--
	GrapeSMv01_01g1622	0	0	0	--
	GrapeSMv01_01g1623	0	0	0	--
	GrapeSMv01_01g1624	0	0	0	--
	GrapeSMv01_01g1625	0.14	0	0	--
	GrapeSMv01_01g1626	0	0	0	HIPP08
	GrapeSMv01_01g1627	0	0	0	--
	GrapeSMv01_01g1628	0	0	0	--
	GrapeSMv01_01g1629	0	0	0	--
	GrapeSMv01_01g1630	0	0	0	-
	GrapeSMv01_01g1631	16.24	12.197	7.54	G6PD2
	GrapeSMv01_01g1632	7.87	2.963	2.55	HSD1
	GrapeSMv01_01g1633	0	0.25	0	HSD1
	GrapeSMv01_01g1634	0	0	0	--
	GrapeSMv01_01g1635	44.58	28.72	31.857	PNSL5
	GrapeSMv01_01g1636	8.797	2.887	3.847	--
	GrapeSMv01_01g1637	25.39	23.35	26.517	EXA1
	GrapeSMv01_01g1638	7.817	35.873	47.503	BAG5
	GrapeSMv01_01g1639	0	0	0	EXO70B1
	GrapeSMv01_01g1640	8.077	9.22	7.847	dadD
	GrapeSMv01_01g1641	10.16	1.643	3.797	--
	GrapeSMv01_01g1642	0.05	0.343	0.257	--
	GrapeSMv01_01g1643	0.017	0	0.077	--
	GrapeSMv01_01g1644	0	0	0	GRXC3
	GrapeSMv01_01g1645	1.447	0.5	0.69	PCMP-E76
	GrapeSMv01_01g1646	96.267	29.913	25.093	PBS1
	GrapeSMv01_01g1647	0.113	0.047	0.077	SWEET15
	GrapeSMv01_01g1648	20.537	15.853	14.077	DCI1
	GrapeSMv01_01g1649	144.037	115.71	62.373	NAC083
	GrapeSMv01_01g1650	23.157	18.267	28.173	--
	GrapeSMv01_01g1651	99.31	115.067	94.44	Os08g0536000
	GrapeSMv01_01g1652	0	0	0	--
	GrapeSMv01_01g1653	60.673	46.363	38.357	At2g33490
	GrapeSMv01_01g1654	4.17	1.52	1.477	LRR1
	GrapeSMv01_01g1655	8.82	3.137	5.343	COL14
	GrapeSMv01_01g1656	6.243	2.147	3.113	--
	GrapeSMv01_01g1657	92.783	88.65	78.023	GILP
	GrapeSMv01_01g1658	0	0	0	--
	GrapeSMv01_01g1659	0.81	0.85	0.413	--
	GrapeSMv01_01g1660	5.277	7.21	3.01	At5g13200
	GrapeSMv01_01g1661	0.31	0	0	--
	GrapeSMv01_01g1662	0	0	0	--
	GrapeSMv01_01g1663	6.32	7.717	4.163	MIMI_L728
	GrapeSMv01_01g1664	9.623	10.54	5.42	--
	GrapeSMv01_01g1665	16.707	5.857	5.98	AFB2
	GrapeSMv01_01g1666	1.11	0.63	0.483	--
	GrapeSMv01_01g1667	51.16	20.8	2.143	TIFY9
	GrapeSMv01_01g1668	1.7	0.643	1.05	PCMP-H89
	GrapeSMv01_01g1669	0.593	0.18	0.177	LAX2
	GrapeSMv01_01g1670	21.51	20.863	14.86	--
	GrapeSMv01_01g1671	0	0.06	0	FUS3
	GrapeSMv01_01g1672	6.543	4.38	3.32	BHLH137
	GrapeSMv01_01g1673	10.88	9.03	10.233	pcnB
	GrapeSMv01_01g1674	13.663	11.17	22.88	ACL1
	GrapeSMv01_01g1675	27.263	36.81	21.7	CPL3
	GrapeSMv01_01g1676	9.637	3.62	4.347	SCD2
	GrapeSMv01_01g1677	1.16	0.023	0.117	FER
	GrapeSMv01_01g1678	0.497	0.363	0.237	SCPL45
	GrapeSMv01_01g1679	6.893	5.363	10.643	NXD1
	GrapeSMv01_01g1680	6.597	1.22	1.84	PCMP-H90
	GrapeSMv01_01g1681	5.41	3.507	6.67	SCRM
	GrapeSMv01_01g1682	7.597	2.137	3.007	AK1
	GrapeSMv01_01g1683	61.823	76.637	94.52	ARF2A
	GrapeSMv01_01g1684	0.56	0.437	0.587	--
	GrapeSMv01_01g1685	102.09	70.2	128.07	LIR1
	GrapeSMv01_01g1686	1.767	1.123	1.233	CRN
	GrapeSMv01_01g1687	17.273	11.133	11.637	AGD3
	GrapeSMv01_01g1688	3	2.993	5.727	--
	GrapeSMv01_01g1689	26.103	18.097	20.937	ASR3
	GrapeSMv01_01g1690	3.277	11.117	22.82	--
	GrapeSMv01_01g1691	0.167	0.2	0.177	SUVH4
	GrapeSMv01_01g1692	0	0	0	--
	GrapeSMv01_01g1693	19.847	38.14	35.123	ML4
	GrapeSMv01_01g1694	21.363	17.867	23.513	OTU1
	GrapeSMv01_01g1695	23.3	13.26	11.917	--
	GrapeSMv01_01g1696	4.083	6.907	7.013	--
	GrapeSMv01_01g1697	58.817	64.34	82.453	--
	GrapeSMv01_01g1698	6.11	8.257	7.74	ORTH2
	GrapeSMv01_01g1699	18.043	6.337	8.65	At1g29880
	GrapeSMv01_01g1700	74.893	58.05	45.71	FES1
	GrapeSMv01_01g1701	28.25	49.097	31.503	SEC14L5
	GrapeSMv01_01g1702	4.25	2.467	2.007	IRX10L
	GrapeSMv01_01g1703	98.697	136.093	90.557	tal
	GrapeSMv01_01g1704	23.333	21.5	30.287	FKBP19
	GrapeSMv01_01g1705	5.053	1.93	1.813	CYP51G1
	GrapeSMv01_01g1706	17.513	15.657	16.387	At5g64680
	GrapeSMv01_01g1707	0	0	0	PME29
	GrapeSMv01_01g1708	0.363	1.48	1.307	NPF6.1
	GrapeSMv01_01g1709	8.333	8.58	27.637	NPF6.1
	GrapeSMv01_01g1710	3.71	4.657	13.813	NPF6.1
	GrapeSMv01_01g1711	3.67	4.313	4.05	--
	GrapeSMv01_01g1712	2.007	1.66	1.043	IPO5
	GrapeSMv01_01g1713	0.117	0.117	0.127	PEX11C
	GrapeSMv01_01g1714	21.793	19.85	21.47	At5g64680
	GrapeSMv01_01g1715	0	0	0	PME29
	GrapeSMv01_01g1716	26.303	21.823	68.72	NPF6.1
	GrapeSMv01_01g1717	11.86	12.833	15.797	At3g02290
	GrapeSMv01_01g1718	8.207	12.477	15.437	At4g14100
	GrapeSMv01_01g1719	3.363	2.66	4.98	At4g14100
	GrapeSMv01_01g1720	0.043	0.08	0.213	--
	GrapeSMv01_01g1721	13.843	16.437	15.63	GH3.17
	GrapeSMv01_01g1722	5.443	3.757	6.75	RPS27B
	GrapeSMv01_01g1723	14.09	9.163	21.133	NUDT13
	GrapeSMv01_01g1724	0	0	0	--
	GrapeSMv01_01g1725	45.96	19.433	14.34	PUB8
	GrapeSMv01_01g1726	0	0	0	--
	GrapeSMv01_01g1727	1.303	0.897	0.713	PAT07
	GrapeSMv01_01g1728	0	0	0.033	--
	GrapeSMv01_01g1729	6.92	2.937	4.2	--
	GrapeSMv01_01g1730	17.777	2.87	5.733	SRC2
	GrapeSMv01_01g1731	0.337	0.063	0.023	--
	GrapeSMv01_01g1732	2.997	3.027	3.24	OsI_36121
	GrapeSMv01_01g1733	188.187	122.837	144.373	CNX1
	GrapeSMv01_01g1734	28.66	8.357	7.717	--
	GrapeSMv01_01g1735	18.79	8.637	9.48	--
	GrapeSMv01_01g1736	22.363	6.737	1.58	RBOHC
	GrapeSMv01_01g1737	0	0	0	RBOHC
	GrapeSMv01_01g1738	0.013	0	0	RBOHD
	GrapeSMv01_01g1739	2.977	0.327	0.283	XTHB
	GrapeSMv01_01g1740	0.453	0.13	0.463	BRG3
	GrapeSMv01_01g1741	0	0	0	GAPA1
	GrapeSMv01_01g1742	0.02	0	0	--
	GrapeSMv01_01g1743	0.61	9.82	0.9	Os04g0403701
	GrapeSMv01_01g1744	0	0.11	0	--
	GrapeSMv01_01g1745	72.807	37.837	44.053	RPL21A
	GrapeSMv01_01g1746	0.27	0.86	0.29	--
	GrapeSMv01_01g1747	0.293	0.217	0.127	Hgsnat
	GrapeSMv01_01g1748	2.627	0.76	0.907	ASHR2
	GrapeSMv01_01g1749	38.133	25.063	27.243	At5g47890
	GrapeSMv01_01g1750	33.117	17.593	22.62	RPL10
	GrapeSMv01_01g1751	51.967	45.813	58.113	At1g09760
	GrapeSMv01_01g1752	0	0	0	At1g64390
	GrapeSMv01_01g1753	39.6	11.12	9.517	FES1
	GrapeSMv01_01g1754	68.98	91.36	78.45	RAD52-2
	GrapeSMv01_01g1755	51.38	50.55	43.66	--
	GrapeSMv01_01g1756	20.65	25.423	17.153	--
	GrapeSMv01_01g1757	0.313	0.463	0.343	At5g03795
	GrapeSMv01_01g1758	48.687	36.9	33.52	--
	GrapeSMv01_01g1759	0	0	0.063	RABA4A
	GrapeSMv01_01g1760	0.663	0.32	0.167	OVA7
	GrapeSMv01_02g0001	9.003	4.157	4.327	Pigu
	GrapeSMv01_02g0002	9.217	7.04	5.187	PUX8
	GrapeSMv01_02g0003	39.597	41.683	41.64	PUX8
	GrapeSMv01_02g0004	2.643	0.907	1.263	MBD13
	GrapeSMv01_02g0005	33.173	18.343	20.503	CYP80B2
	GrapeSMv01_02g0006	0	0	0	SCL28
	GrapeSMv01_02g0007	0	0	0	WLIN2A
	GrapeSMv01_02g0008	22.473	22.597	28.36	--
	GrapeSMv01_02g0009	4.03	9.033	2.94	TET10
	GrapeSMv01_02g0010	1.477	1.097	0.577	--
	GrapeSMv01_02g0011	4.417	1.91	3.403	RH48
	GrapeSMv01_02g0012	1.51	1.97	2.267	--
	GrapeSMv01_02g0013	0	0	0	--
	GrapeSMv01_02g0014	10.087	6.253	5.943	--
	GrapeSMv01_02g0015	0	0	0	--
	GrapeSMv01_02g0016	0	0	0	--
	GrapeSMv01_02g0017	0	0	0	-
	GrapeSMv01_02g0018	0	0	0	NMT3
	GrapeSMv01_02g0019	0	0	0	--
	GrapeSMv01_02g0020	0	0	0	--
	GrapeSMv01_02g0021	0	0	0	--
	GrapeSMv01_02g0022	0	0	0	NMT3
	GrapeSMv01_02g0023	0	0	0	--
	GrapeSMv01_02g0024	0	0	0	--
	GrapeSMv01_02g0025	0	0	0	-
	GrapeSMv01_02g0026	18.333	13.27	15.47	RH8
	GrapeSMv01_02g0027	0.283	0.067	0	--
	GrapeSMv01_02g0028	0.04	0	0	--
	GrapeSMv01_02g0029	0	0	0	--
	GrapeSMv01_02g0030	0	0	0	NFYC3
	GrapeSMv01_02g0031	0.987	0.223	0.25	--
	GrapeSMv01_02g0032	0	0	0	At1g63410
	GrapeSMv01_02g0033	0.147	0	0.117	At1g63410
	GrapeSMv01_02g0034	0.077	0	0	At1g63410
	GrapeSMv01_02g0035	3.433	6.783	3.887	rumi
	GrapeSMv01_02g0036	4.487	2.37	2.99	At1g63430
	GrapeSMv01_02g0037	12.113	9.38	12.39	NOB1
	GrapeSMv01_02g0038	0	0	0	At1g63430
	GrapeSMv01_02g0039	3.843	1.33	1.597	TUBB2
	GrapeSMv01_02g0040	5.2	1.357	0.737	SR
	GrapeSMv01_02g0041	27.487	16.67	9.977	AAE3
	GrapeSMv01_02g0042	0.343	0.373	0.383	HMA5
	GrapeSMv01_02g0043	26.03	15.37	15.247	GSTT1
	GrapeSMv01_02g0044	0	0	0	--
	GrapeSMv01_02g0045	0.027	0.007	0.017	FTIP3
	GrapeSMv01_02g0046	0	0	0	GT16
	GrapeSMv01_02g0047	238.037	429.523	301.98	GPX6
	GrapeSMv01_02g0048	0.973	4.23	1.533	GPX8
	GrapeSMv01_02g0049	13.84	9.147	15.94	AHL5
	GrapeSMv01_02g0050	0.12	0	0	--
	GrapeSMv01_02g0051	0	0	0	psbD
	GrapeSMv01_02g0052	4.743	1.927	3.907	Msil_0742
	GrapeSMv01_02g0053	20.28	24.707	22.313	Kdm5a
	GrapeSMv01_02g0054	20.27	30.463	26.007	BSK7
	GrapeSMv01_02g0055	3.153	5.33	6.113	TUBB1
	GrapeSMv01_02g0056	173.32	504.027	350.063	GSH1
	GrapeSMv01_02g0057	110.73	261	207.54	PYRP2
	GrapeSMv01_02g0058	58.353	71.313	67.607	--
	GrapeSMv01_02g0059	0	0	0	--
	GrapeSMv01_02g0060	0.79	0.943	0.39	--
	GrapeSMv01_02g0061	3.69	4.1	8.523	mcfF
	GrapeSMv01_02g0062	0	0	0	--
	GrapeSMv01_02g0063	3.73	4.417	3.093	KIN14J
	GrapeSMv01_02g0064	36.437	22.893	20.15	At2g33840
	GrapeSMv01_02g0065	8.94	7.5	7.153	--
	GrapeSMv01_02g0066	0	0	0	--
	GrapeSMv01_02g0067	6.903	0.883	1.317	GL3
	GrapeSMv01_02g0068	0.47	0.157	0.15	At5g51310
	GrapeSMv01_02g0069	30.727	16.47	25.71	guaA
	GrapeSMv01_02g0070	32.64	30.81	27.963	--
	GrapeSMv01_02g0071	6.687	2.673	3.237	MURE
	GrapeSMv01_02g0072	1.517	1.697	1.383	--
	GrapeSMv01_02g0073	72.687	108.583	93.367	SPPL2
	GrapeSMv01_02g0074	149.707	242.257	367.007	PIP1-3
	GrapeSMv01_02g0075	41.687	14.69	18.87	TIC32
	GrapeSMv01_02g0076	10.69	7.3	10.55	YDA
	GrapeSMv01_02g0077	0	0	0	--
	GrapeSMv01_02g0078	0	0	0	--
	GrapeSMv01_02g0079	0.277	0.317	0.103	AHA11
	GrapeSMv01_02g0080	0.133	0.113	0.11	CYP86A22
	GrapeSMv01_02g0081	12.76	18.383	23.827	LSI3
	GrapeSMv01_02g0082	29.423	43.193	55.47	LSI2
	GrapeSMv01_02g0083	58.007	39.35	25.49	At5g41330
	GrapeSMv01_02g0084	56.947	59.847	53.903	At1g76660
	GrapeSMv01_02g0085	224.263	206.42	226.073	MPA1
	GrapeSMv01_02g0086	11.94	21.267	18.697	NIP3-1
	GrapeSMv01_02g0087	7.01	2.333	2.883	FAX4
	GrapeSMv01_02g0088	12.297	3.133	3.123	At4g10390
	GrapeSMv01_02g0089	0.79	0.6	0.32	--
	GrapeSMv01_02g0090	0	0	0	--
	GrapeSMv01_02g0091	12.39	40.29	32.317	GT-2
	GrapeSMv01_02g0092	30.63	29.61	42.337	tmem120
	GrapeSMv01_02g0093	0.4	0.293	0.16	At1g33170
	GrapeSMv01_02g0094	9.357	6.387	2.883	--
	GrapeSMv01_02g0095	0.173	0.063	0.04	At3g30340
	GrapeSMv01_02g0096	0.313	0.383	0.363	--
	GrapeSMv01_02g0097	0	0	0	--
	GrapeSMv01_02g0098	33.807	32.617	40.95	NUP98A
	GrapeSMv01_02g0099	24.19	12.21	14.423	At1g43650
	GrapeSMv01_02g0100	0.693	0.63	0.26	At1g43650
	GrapeSMv01_02g0101	1.927	0.453	1.16	CAD1
	GrapeSMv01_02g0102	17.727	5.173	8.463	CAD1
	GrapeSMv01_02g0103	11.953	5.833	7.47	--
	GrapeSMv01_02g0104	0.067	0.04	0.913	ATL79
	GrapeSMv01_02g0105	11.92	9.11	9.617	Heatr6
	GrapeSMv01_02g0106	0	0	0	--
	GrapeSMv01_02g0107	0.847	0.67	0.517	--
	GrapeSMv01_02g0108	89.22	84.733	48.867	NTL9
	GrapeSMv01_02g0109	0	0.357	0.107	--
	GrapeSMv01_02g0110	37.23	13.623	15.48	HIPP44
	GrapeSMv01_02g0111	0.64	2.6	4.37	--
	GrapeSMv01_02g0112	0	0	0	--
	GrapeSMv01_02g0113	21.143	32.64	18.33	Os03g0120900
	GrapeSMv01_02g0114	0.227	0.107	0.057	tim13
	GrapeSMv01_02g0115	7.273	6.337	2.757	PPA1
	GrapeSMv01_02g0116	8.66	48.56	47.713	DLO2
	GrapeSMv01_02g0117	26.827	69.107	2.077	DLO2
	GrapeSMv01_02g0118	0	0	0	-
	GrapeSMv01_02g0119	50.263	93.577	22.937	COMT1
	GrapeSMv01_02g0120	17.133	12.257	12.09	MTP1
	GrapeSMv01_02g0121	36.463	21.633	23.793	RPL11
	GrapeSMv01_02g0122	0	0.13	0	ATL1
	GrapeSMv01_02g0123	1.817	1.393	2.183	--
	GrapeSMv01_02g0124	4.87	3.01	4.777	SBT3.3
	GrapeSMv01_02g0125	0	0.07	0.04	SBT3.8
	GrapeSMv01_02g0126	0.063	0.097	0.02	SBT3.6
	GrapeSMv01_02g0127	18.717	9.3	7.08	SBT3.8
	GrapeSMv01_02g0128	1.83	0.54	0.37	--
	GrapeSMv01_02g0129	7.593	5.957	4.63	GALT31A
	GrapeSMv01_02g0130	65.567	66.743	98.033	--
	GrapeSMv01_02g0131	0	0	0	PDH-E1
	GrapeSMv01_02g0132	5.64	15.657	8.4	--
	GrapeSMv01_02g0133	0.673	1.147	0.683	AVP1
	GrapeSMv01_02g0134	331.527	404.507	448.697	WAXY
	GrapeSMv01_02g0135	0.147	0	0	RPP1A
	GrapeSMv01_02g0136	16.75	17.88	16.88	At1g32860
	GrapeSMv01_02g0137	34.153	35.197	34.22	UBP10
	GrapeSMv01_02g0138	41.923	36.863	24.787	CID11
	GrapeSMv01_02g0139	0	0	0	At1g32780
	GrapeSMv01_02g0140	1.943	0.737	0.86	--
	GrapeSMv01_02g0141	1.47	1.043	0.657	--
	GrapeSMv01_02g0142	0	0	0.147	NAC043
	GrapeSMv01_02g0143	0.03	0	0	NAC043
	GrapeSMv01_02g0144	0.21	0.07	0.057	At5g39865
	GrapeSMv01_02g0145	0	0	0	IQD1
	GrapeSMv01_02g0146	0.947	0.53	0.453	GRF8
	GrapeSMv01_02g0147	1.503	0.823	0.54	BLT
	GrapeSMv01_02g0148	108.53	56.513	51.827	CAND7
	GrapeSMv01_02g0149	0.607	3.39	0.47	CEL1
	GrapeSMv01_02g0150	7.18	39.347	93.933	D27
	GrapeSMv01_02g0151	0	0	0	At5g41890
	GrapeSMv01_02g0152	0.857	0.173	0.383	BDG3
	GrapeSMv01_02g0153	0.427	0	0.113	MYC4
	GrapeSMv01_02g0154	0	0	0	GLOX1
	GrapeSMv01_02g0155	105.033	394.503	160.267	HOX22
	GrapeSMv01_02g0156	46.947	116.387	74.287	MED10B
	GrapeSMv01_02g0157	18.25	19.463	135.753	CYP78A3
	GrapeSMv01_02g0158	170.41	674.783	391.073	MGL
	GrapeSMv01_02g0159	8.717	5.403	8.837	EMB8
	GrapeSMv01_02g0160	0.43	0.05	0.107	--
	GrapeSMv01_02g0161	89.833	96.993	94.443	GYP7
	GrapeSMv01_02g0162	35.06	17.823	17.867	HLB1
	GrapeSMv01_02g0163	0.32	0.447	0.403	YSL1
	GrapeSMv01_02g0164	152.733	193.493	279.377	YSL1
	GrapeSMv01_02g0165	8.803	7.34	2.84	--
	GrapeSMv01_02g0166	81.107	64.157	62.143	fray2
	GrapeSMv01_02g0167	24.477	26.713	23.783	--
	GrapeSMv01_02g0168	0.623	0.393	0.363	--
	GrapeSMv01_02g0169	21.34	12.447	15.947	--
	GrapeSMv01_02g0170	30.077	24.607	25.387	C12orf10
	GrapeSMv01_02g0171	40.57	14.723	16.967	hpcH
	GrapeSMv01_02g0172	7.707	4.353	4.37	mfsd5
	GrapeSMv01_02g0173	1.657	0.577	0.777	--
	GrapeSMv01_02g0174	15.02	11.81	12.753	Os02g0672600
	GrapeSMv01_02g0175	15.737	17.973	25.667	OPT7
	GrapeSMv01_02g0176	9.96	5.657	4.247	At4g27745
	GrapeSMv01_02g0177	15.98	20.523	22.753	WNK8
	GrapeSMv01_02g0178	0.427	0.503	1.01	--
	GrapeSMv01_02g0179	0	0	0	FBP24
	GrapeSMv01_02g0180	45.307	58.653	58.493	PUX10
	GrapeSMv01_02g0181	17.797	16.947	21.253	--
	GrapeSMv01_02g0182	0	0.05	0	ALMT10
	GrapeSMv01_02g0183	3.183	2.587	3.83	BHLH157
	GrapeSMv01_02g0184	0	0	0	--
	GrapeSMv01_02g0185	17.137	9.58	12.357	At3g05675
	GrapeSMv01_02g0186	27.3	22.367	28.39	SPBC119.09c
	GrapeSMv01_02g0187	0.373	0	0	--
	GrapeSMv01_02g0188	28.32	24.1	23.507	DOF4.6
	GrapeSMv01_02g0189	32.697	18.017	13.693	WDR44
	GrapeSMv01_02g0190	0.143	0.023	0.097	--
	GrapeSMv01_02g0191	0	0	0	MYB3
	GrapeSMv01_02g0192	7.887	2.6	5.81	cox1101
	GrapeSMv01_02g0193	1.65	0.17	0.967	TIC32B
	GrapeSMv01_02g0194	13.83	6.62	4.34	TRE1
	GrapeSMv01_02g0195	38.163	21.21	21.697	ABCF3
	GrapeSMv01_02g0196	0	0	0	--
	GrapeSMv01_02g0197	45.227	24.52	22.267	At1g55090
	GrapeSMv01_02g0198	240.943	114.317	85.247	BIP4
	GrapeSMv01_02g0199	3.433	1.09	0.887	--
	GrapeSMv01_02g0200	12.393	9.127	8.333	BAM1
	GrapeSMv01_02g0201	29.95	17.01	14.213	BAM3
	GrapeSMv01_02g0202	0	0	0	--
	GrapeSMv01_02g0203	16.72	3.747	5.33	--
	GrapeSMv01_02g0204	0	0	0.143	--
	GrapeSMv01_02g0205	0	0.037	0	--
	GrapeSMv01_02g0206	24.587	16.297	13.98	KLCR1
	GrapeSMv01_02g0207	11.38	11.363	17.533	NLP7
	GrapeSMv01_02g0208	0	0	0	NLP6
	GrapeSMv01_02g0209	0	0	0	--
	GrapeSMv01_02g0210	1.097	0.53	0.28	--
	GrapeSMv01_02g0211	30.513	8.36	20.963	ABIL3
	GrapeSMv01_02g0212	79.05	65.757	76.573	RPN12A
	GrapeSMv01_02g0213	49.487	34.73	54.123	RPS6
	GrapeSMv01_02g0214	0.08	0.073	0.16	RHA4A
	GrapeSMv01_02g0215	1.277	6.12	1.027	CSLG3
	GrapeSMv01_02g0216	0.023	0.07	0.823	CSLG3
	GrapeSMv01_02g0217	0.07	0	0	CSLG3
	GrapeSMv01_02g0218	0	0	0	--
	GrapeSMv01_02g0219	0	0	0	CSLG3
	GrapeSMv01_02g0220	0.043	0.043	0.017	-
	GrapeSMv01_02g0221	0.853	1.01	1.31	CSLG3
	GrapeSMv01_02g0222	0	0	0	CSLG3
	GrapeSMv01_02g0223	1.683	2.127	1.217	CSLG3
	GrapeSMv01_02g0224	0	0	0	--
	GrapeSMv01_02g0225	0	0	0	CSLG3
	GrapeSMv01_02g0226	0	0	0.1	CSLG3
	GrapeSMv01_02g0227	2.53	3.493	1.15	CSLG3
	GrapeSMv01_02g0228	0	0	0	--
	GrapeSMv01_02g0229	0.027	0	0	CSLG3
	GrapeSMv01_02g0230	0.527	0.683	0.243	CSLG3
	GrapeSMv01_02g0231	2.41	4.053	5.74	CSLG3
	GrapeSMv01_02g0232	0	0	0	CSLG3
	GrapeSMv01_02g0233	0	0	0	SBT1.5
	GrapeSMv01_02g0234	0	0	0	-
	GrapeSMv01_02g0235	0.113	0.127	0.18	CSLG3
	GrapeSMv01_02g0236	6.39	8.467	6.813	CSLG3
	GrapeSMv01_02g0237	4.523	6.637	5.55	CSLG3
	GrapeSMv01_02g0238	0.027	0	0	CSLG3
[truncated: 30,229 more rows]

## Sheet: Table S6
	Table S6. Information of DEGs detected in control vs. Dro
	Gene ID	control_fpkm	Dro_fpkm	Symbol
	GrapeSMv01_01g0298	44.6133	211.17	CHUP1
	GrapeSMv01_01g0507	12.7333	383.73	Dnajb8
	GrapeSMv01_01g0827	652.603	4565.71	GOLS1
	GrapeSMv01_02g0158	170.41	674.783	MGL
	GrapeSMv01_02g0243	5.68333	79.5	At5g39865
	GrapeSMv01_02g0555	43.3467	438.773	CYP76B10
	GrapeSMv01_03g0289	269.877	13.3633	NAC022
	GrapeSMv01_03g0583	5.18667	101.45	MES10
	GrapeSMv01_04g1082	121.02	5.3	CRT3
	GrapeSMv01_05g1311	5.99	115.22	DBR
	GrapeSMv01_05g1661	5.97333	145.293	PIN1D
	GrapeSMv01_06g0144	730.13	100.94	LOX2.1
	GrapeSMv01_06g0681	40.57	609.723	At2g29260
	GrapeSMv01_06g1324	109.69	468.09	AGT1
	GrapeSMv01_07g0260	6.74667	105.313	UGT85K5
	GrapeSMv01_07g0768	68.21	457.747	ABCF5
	GrapeSMv01_07g1093	8.84667	197.87	FLZ8
	GrapeSMv01_07g1233	101.573	470.977	YUC10
	GrapeSMv01_08g0528	24.11	379.307	PFE2
	GrapeSMv01_08g1022	202.45	695.44	RCA1
	GrapeSMv01_08g1482	29.2733	189.44	--
	GrapeSMv01_08g1615	11.5433	173.447	--
	GrapeSMv01_09g0319	12.6133	111.157	At3g21360
	GrapeSMv01_09g0669	40.1767	349.98	KEG
	GrapeSMv01_10g0110	74.0033	387.163	2022-04-03
	GrapeSMv01_10g1016	138.263	3.08667	OSCBPY
	GrapeSMv01_11g0578	149.647	1647.62	RFS6
	GrapeSMv01_12g0525	67.3867	1171.88	NPF6.4
	GrapeSMv01_13g1353	14.2933	250.557	LNK3
	GrapeSMv01_14g0453	12.73	99.84	COL2
	GrapeSMv01_14g1714	16.8133	256.777	OASA1
	GrapeSMv01_14g1959	12.4367	105.267	--
	GrapeSMv01_15g0790	34.9633	266.92	LHY
	GrapeSMv01_15g0798	11.68	181.953	PRR95
	GrapeSMv01_15g0836	112.29	1209.26	HOX22
	GrapeSMv01_15g1078	36.3	173.45	RVE5
	GrapeSMv01_16g0023	5.24667	66.32	IGHMBP2
	GrapeSMv01_16g1176	14.8033	231.36	SIGE
	GrapeSMv01_17g0189	9.91333	231.853	--
	GrapeSMv01_17g0913	34.4467	507.17	PUB19
	GrapeSMv01_18g0098	25.1867	155.233	At2g30600/At2g30610
	GrapeSMv01_18g0386	38.3367	179.73	SHM7
	GrapeSMv01_18g1350	21.5833	202.523	--
	GrapeSMv01_19g0054	82.5567	555.767	--
	GrapeSMv01_05g0695	14.53	195.513	ELIP1
	GrapeSMv01_17g0349	127.693	8.34667	SARD1
	GrapeSMv01_02g0976	14.3267	122.81	--
	GrapeSMv01_14g1341	8.51667	187.877	DPD1
	GrapeSMv01_14g0741	9.72667	93.3767	RCOM_0530710
	GrapeSMv01_14g1072	5.40333	137.98	--
	GrapeSMv01_18g0679	19.0633	241.34	--
	GrapeSMv01_11g0659	244.14	1156.39	--
	GrapeSMv01_12g0473	4.31333	61.36	2022-04-03
	GrapeSMv01_14g0409	114.223	3.39667	AOC
	GrapeSMv01_13g0244	34.78	157.187	--
	GrapeSMv01_01g0598	25.3433	133.037	ADO3
	GrapeSMv01_09g0044	10.91	138.447	HSP17.4B
	GrapeSMv01_07g0261	31.3333	378.12	UGT85K5
	GrapeSMv01_04g0803	22.1267	173.48	RVE1
	GrapeSMv01_12g0273	59.2967	259.917	TBL39
	GrapeSMv01_14g0647	15.0467	113.797	At5g13200
	GrapeSMv01_05g0057	152.773	21.2067	SAG101
	GrapeSMv01_11g0619	15.4267	88.0033	ANTR6
	GrapeSMv01_08g1553	10.0767	58.28	CHLH
	GrapeSMv01_19g1007	163.197	8.86333	GA2OX1
	GrapeSMv01_16g0967	86.9167	653.333	AAE3
	GrapeSMv01_08g1163	37.6833	216.417	CAX3
	MSTRG.7187	116.467	11.4967	At5g66900
	GrapeSMv01_06g0782	26.0267	161.787	ANTR1
	GrapeSMv01_03g0103	184.913	884.237	--
	MSTRG.872	2.28	36.3133	IGHMBP2
	GrapeSMv01_03g0590	3.00333	115.997	At5g05600
	GrapeSMv01_04g0351	25.8367	208.607	ASP3
	GrapeSMv01_14g1385	41.7767	286.953	GRDP2
	GrapeSMv01_02g0576	145.087	754.403	SGR
	GrapeSMv01_11g1116	203.883	24.86	APO3
	GrapeSMv01_15g0234	23.3033	142.473	At1g04770
	GrapeSMv01_04g0451	124.707	1348.11	--
	GrapeSMv01_13g0461	52.1867	202.07	PRO2
	GrapeSMv01_11g0741	135.21	436.41	CIPK6
	GrapeSMv01_11g0379	68.7133	548.607	NYC1
	GrapeSMv01_19g0188	67.09	461.947	JA2L
	GrapeSMv01_Sca0160	14.19	87.7267	HMT3
	GrapeSMv01_11g0894	18.4167	169.227	SAMDC
	GrapeSMv01_03g1078	361.85	52.8033	HVA22A
	MSTRG.18481	86.28	11.5567	RUN1
	GrapeSMv01_09g1343	3.61667	89.1533	--
	GrapeSMv01_18g0612	56.71	195.723	--
	GrapeSMv01_01g0061	407.943	67.0333	UGD1
	GrapeSMv01_10g0277	178.783	20.64	RGLG2
	GrapeSMv01_05g0239	14.6267	130.343	--
	GrapeSMv01_18g1465	105.13	380.66	SDC
	GrapeSMv01_04g1471	171.223	557.54	HMGB2
	GrapeSMv01_19g0187	64.0233	220.163	--
	GrapeSMv01_08g0465	94.16	3.52333	PNC1
	GrapeSMv01_11g0540	39.73	201.287	EBF2
	GrapeSMv01_08g1430	159.257	6.1	RZPF34
	GrapeSMv01_07g1423	30.37	219.153	PLIP2
	GrapeSMv01_13g0445	169.457	597.053	PP2CA
	GrapeSMv01_19g0687	244.847	42.62	GDPDL4
	GrapeSMv01_08g1656	27.45	208.543	NAC047
	GrapeSMv01_18g0865	91.7433	261.137	MYB73
	GrapeSMv01_12g0722	214.207	28.6667	DGK5
	GrapeSMv01_11g0361	175.897	31.3233	AIM1
	GrapeSMv01_07g1208	164.247	492.38	GID1B
	GrapeSMv01_02g1267	16.15	108.057	AOX1A
	GrapeSMv01_01g0658	497.487	2143.1	COR2
	GrapeSMv01_04g0673	84.2233	3.69667	At5g10770
	GrapeSMv01_05g1103	177.633	492.02	PED1
	GrapeSMv01_16g1195	21.9567	150.83	PP2C51
	GrapeSMv01_11g0069	28.0133	122.267	ALDH7B4
	GrapeSMv01_04g1290	142.333	535.417	CYP84A1
	GrapeSMv01_12g0486	5.67	67.59	MAPKKK18
	GrapeSMv01_11g0748	14.1767	88.5667	GAPN
	GrapeSMv01_07g1848	4.00333	79.4667	SDI1
	GrapeSMv01_02g0737	12.6933	88.81	gfo
	GrapeSMv01_02g0323	21.6933	116.973	CPRF1
	GrapeSMv01_06g1410	4.21	94.96	ZAT5
	GrapeSMv01_08g0578	92.0767	2.69667	PNC1
	GrapeSMv01_07g0522	14.7367	102.973	--
	GrapeSMv01_09g0067	486.733	91.52	TIFY10A
	GrapeSMv01_04g0658	60.0633	271.637	TIC55
	GrapeSMv01_13g0453	2.13667	34.7667	UVR8
	GrapeSMv01_02g0871	278.517	1323.01	BAM3
	GrapeSMv01_10g1458	158.353	29.2267	At5g66900
	GrapeSMv01_05g0776	50.2133	258.897	CSLG2
	GrapeSMv01_05g1023	128.383	465.063	BAM1
	GrapeSMv01_07g1150	28.4333	165.027	EDL3
	GrapeSMv01_11g0373	3.58667	33.2667	At5g25630
	GrapeSMv01_05g1367	119.793	348.747	IQD14
	GrapeSMv01_08g0310	35.8567	188.533	DGD1
	GrapeSMv01_16g0839	12.19	64.49	ABCB28
	GrapeSMv01_19g0791	89.8667	310.35	CSLE6
	GrapeSMv01_06g0505	312.367	1401.13	--
	GrapeSMv01_06g0061	13.9867	77.7333	PTC52
	GrapeSMv01_08g0018	97.65	314.777	At2g38640
	GrapeSMv01_09g0415	100.687	8.08333	IQM4
	GrapeSMv01_17g0347	112.953	10.2033	SARD1
	GrapeSMv01_11g0802	51.0867	160.093	CIPK6
	GrapeSMv01_12g0078	18.4	83.44	PSY
	GrapeSMv01_14g0956	65.5167	3.96333	AATP1
	GrapeSMv01_18g1058	114.917	4.35	CML41
	GrapeSMv01_09g0318	199.47	588.267	At3g21360
	GrapeSMv01_07g0956	25.5333	107.807	CLC-C
	GrapeSMv01_18g0671	83.5967	11.9633	RLK7
	GrapeSMv01_02g0156	46.9467	116.387	MED10B
	GrapeSMv01_08g1169	7.19333	32.4433	TMK2
	GrapeSMv01_07g2068	58.8933	195.41	PUB9
	GrapeSMv01_08g0911	8.67333	59.6467	RVE8
	GrapeSMv01_02g0569	11.21	86.55	HPR3
	GrapeSMv01_18g0553	24.74	141.467	PUP1
	GrapeSMv01_11g0010	34.18	162.463	LKR/SDH
	GrapeSMv01_17g0608	12.82	66.0267	--
	GrapeSMv01_02g0538	17.7733	85.6667	ACS10
	GrapeSMv01_11g1289	119.927	544.507	CIPK21
	GrapeSMv01_04g0814	68.65	201.177	GAD1
	GrapeSMv01_07g0907	362.317	75.06	B3GALT7
	GrapeSMv01_12g0706	133.183	5.03667	MYB4
	GrapeSMv01_04g1241	243.393	581.607	RD19A
	GrapeSMv01_14g0237	7.34333	92.1333	--
	GrapeSMv01_18g0417	4.65	35.96	ST3
	GrapeSMv01_01g0846	33.6833	168.22	SRO2
	GrapeSMv01_16g1261	13.9567	50.7	GLT1
	GrapeSMv01_12g0810	95.45	2.3	--
	GrapeSMv01_17g0926	73.3867	181.81	EX2
	GrapeSMv01_02g0155	105.033	394.503	HOX22
	GrapeSMv01_16g1324	23.52	83.0767	APRR5
	GrapeSMv01_12g1034	42.2733	2.55333	BAK1
	GrapeSMv01_10g0264	14.1167	89.76	TDT
	GrapeSMv01_01g0910	29.9133	111.79	TPS9
	GrapeSMv01_05g0572	228.96	608.567	TSJT1
	GrapeSMv01_10g0796	70.2433	298.447	CAMRLK
	GrapeSMv01_18g1113	25.6633	113.727	At1g01500
	GrapeSMv01_03g0897	10.02	95.1633	PSK
	GrapeSMv01_17g1084	141.183	17.92	SOBIR1
	GrapeSMv01_10g1028	187.05	10.7033	TIFY5A
	GrapeSMv01_12g0143	30.0133	186.773	CAJ1
	GrapeSMv01_05g1022	67.3867	249.45	BAM1
	GrapeSMv01_Sca0157	22.5	82.9433	ABCB28
	GrapeSMv01_01g0893	27.2433	107.387	PUB18
	GrapeSMv01_14g1232	41.7433	129.693	NEAP3
	GrapeSMv01_12g1248	19.69	165.287	--
	GrapeSMv01_05g0112	22.25	121.807	HGN1
	GrapeSMv01_08g0408	5.94333	71.45	PFE2
	GrapeSMv01_18g0021	34.98	113.007	--
	GrapeSMv01_17g0626	37.7067	113.157	HOX16
	GrapeSMv01_11g0876	80.5933	209.793	--
	GrapeSMv01_06g0529	5.45333	50.7367	--
	GrapeSMv01_19g0166	19.8567	107.917	--
	GrapeSMv01_03g0684	67.18	203.04	WSD1
	GrapeSMv01_17g0719	17.7667	87.8933	NAC100
	MSTRG.11789	27.19	84.8433	RKF1
	GrapeSMv01_11g0015	21.98	70.2567	FAB1B
	GrapeSMv01_11g0808	24.39	93.6667	GAPN
	GrapeSMv01_10g0059	118.587	8.23667	OSCA1
	GrapeSMv01_07g0709	102.197	12.19	AAO
	GrapeSMv01_13g1581	172.07	470.09	PPH
	GrapeSMv01_08g1662	68.79	211.93	At1g08570
	GrapeSMv01_19g0007	17.3033	75.43	ATG18F
	GrapeSMv01_02g0503	11.6133	49.9533	CYP76B6
	GrapeSMv01_06g0094	209.34	18.2767	DIR7
	GrapeSMv01_08g0846	184.297	436.387	PPA4
	GrapeSMv01_10g0484	85.7633	13.0633	SD18
	GrapeSMv01_19g0853	21.8933	107.92	AAP7
	GrapeSMv01_10g0793	2.82667	34.99	CIPK5
	GrapeSMv01_12g0723	94.7667	241.107	THF1
	MSTRG.15325	42.13	5.11333	RPV1
	GrapeSMv01_14g0748	28.6867	133.997	--
	GrapeSMv01_16g1019	92.3833	294.723	SCL8
	GrapeSMv01_17g0154	11.7367	52.46	KING1
	GrapeSMv01_08g1059	6.95333	43.94	RE
	GrapeSMv01_03g0359	355.28	86.5433	CPK6
	GrapeSMv01_16g1408	77.9333	194.223	CLPX1
	GrapeSMv01_Sca0223	2.45333	16.71	KAT2
	GrapeSMv01_05g0746	75.8767	5.47	BHLH92
	GrapeSMv01_10g0726	57.2967	3.03333	GLR2.9
	GrapeSMv01_02g0056	173.32	504.027	GSH1
	GrapeSMv01_12g0857	31.9767	141.63	XERICO
	GrapeSMv01_05g0524	30.5367	128.1	PPD
	GrapeSMv01_05g0976	55.7067	171.313	IIL1
	GrapeSMv01_15g0774	97.5433	13.3867	NTL9
	GrapeSMv01_07g0032	41.25	2.55333	--
	GrapeSMv01_19g0675	86.6533	359.853	--
	GrapeSMv01_01g0287	27.0567	86.4867	PPC4
	GrapeSMv01_04g1453	143.777	24.8267	PSAT2
	GrapeSMv01_18g0923	239.213	666.577	ABF2
	GrapeSMv01_02g0394	53.04	170.1	CA2
	GrapeSMv01_07g1324	52.1867	189.187	--
	MSTRG.18973	65.5133	8.86667	SBT3.3
	GrapeSMv01_14g1718	187.207	525.537	RCS3
	GrapeSMv01_08g0818	71.6267	204.07	MBR2
	GrapeSMv01_14g1165	14.1667	57.3233	CNGC2
	GrapeSMv01_18g1082	51.22	131.007	JAC1
	GrapeSMv01_03g0457	8.82	54.8233	At1g01500
	GrapeSMv01_14g1291	33.0567	129.583	BHLH148
	GrapeSMv01_05g0200	43.6833	162.657	At3g62260
	GrapeSMv01_10g0878	4.88333	71.4867	--
	GrapeSMv01_04g1707	41.0667	176.357	PILS1
	GrapeSMv01_06g0696	79.2767	241.38	SAG113
	GrapeSMv01_13g1672	102.137	313.02	CCD1
	GrapeSMv01_14g0630	6.83	33.5633	SCRM
	GrapeSMv01_18g0290	15.8233	78.1267	CAO
	GrapeSMv01_14g0169	25.2433	72.1833	SPA15
	GrapeSMv01_17g0348	46.3133	1.82333	SARD1
	GrapeSMv01_05g0385	32.8767	184.823	--
	GrapeSMv01_18g0555	12.3267	70.5933	PUP1
	GrapeSMv01_12g0070	83.2167	257.607	HPD
	GrapeSMv01_14g0803	93.2333	254.137	--
	GrapeSMv01_08g0266	12.06	58.93	--
	GrapeSMv01_07g0300	13.77	54.4533	ATL6
	GrapeSMv01_16g0106	41.2567	102.147	SIGA
	GrapeSMv01_18g1308	313.417	64.8167	HSP90
	GrapeSMv01_09g0097	195.66	720.577	RSH3
	GrapeSMv01_19g1332	21.5333	2.12333	SIS8
	GrapeSMv01_08g1467	6.89667	38.7033	AVT1A
	GrapeSMv01_10g0672	155.647	653.423	DRM1
	GrapeSMv01_13g1093	19.3033	73.9133	ZIFL1
	GrapeSMv01_04g0046	22.0067	88.5067	At2g19810
	GrapeSMv01_19g0330	77.7367	261.137	Os07g0631100
	GrapeSMv01_12g0506	799.74	181.713	HPL
	GrapeSMv01_04g0114	64	210.703	GDCSP
	GrapeSMv01_06g0588	88.78	277.62	SAG113
	GrapeSMv01_07g0158	80.8267	218.037	SABP2
	GrapeSMv01_18g0097	305.9	747.97	CAT1
	GrapeSMv01_01g0826	256.34	535.313	ISU1
	GrapeSMv01_09g0387	187.253	537.067	dlc-1
	GrapeSMv01_16g0451	111.617	23.8967	PUB52
	GrapeSMv01_08g0994	50.3667	216.45	--
	GrapeSMv01_15g0606	32.84	163.887	BEN1
	GrapeSMv01_04g0387	47.38	131.363	LSI2
	GrapeSMv01_09g0635	34.9067	156.893	--
	GrapeSMv01_07g1376	105.443	14.5933	ERF071
	GrapeSMv01_05g0493	22.7467	77.1967	NHX2
	GrapeSMv01_10g0691	29.0433	90.9567	Dnajb13
	GrapeSMv01_14g1112	53.6967	6.84667	--
	GrapeSMv01_01g0386	28.96	111.033	--
	GrapeSMv01_06g0849	16.65	51.7033	FKFBP
	GrapeSMv01_14g0513	92.9933	9.8	--
	GrapeSMv01_09g0658	3.67667	32.79	ADS3
	GrapeSMv01_07g0689	26.5433	72.5567	KRP7
	GrapeSMv01_18g0240	25.9333	99.49	NADK2
	GrapeSMv01_07g1556	115.347	334.38	WRKY6
	GrapeSMv01_05g0169	38.3267	97.7267	--
	GrapeSMv01_Sca0038	31.1667	86.4667	SPS1
	GrapeSMv01_18g1080	24.4233	71.3067	LPEAT1
	GrapeSMv01_16g1293	11.0433	57.7467	--
	GrapeSMv01_01g0222	3.06667	22.32	--
	GrapeSMv01_06g0453	96.41	335.353	ZAT11
	GrapeSMv01_13g1708	47.41	122.827	MKRN
	GrapeSMv01_13g0550	22.5167	77.05	At2g39920
	GrapeSMv01_10g0058	78.6033	5.01667	CSC1
	GrapeSMv01_13g0723	58.4267	152.207	--
	GrapeSMv01_19g0854	73.7667	175.587	AAP7
	GrapeSMv01_06g0939	1.34667	30.8733	LBD15
	GrapeSMv01_12g0048	35.1133	122.04	CAB40
	GrapeSMv01_10g1041	15.8833	60.8967	DELTA-OAT
	GrapeSMv01_04g0095	34.0867	152.2	GRXC6
	GrapeSMv01_12g0239	110.943	20.47	At2g42690
	GrapeSMv01_02g0150	7.18	39.3467	D27
	GrapeSMv01_06g1392	6.66667	30.3767	IRX7
	GrapeSMv01_11g0497	9.46	59.2967	--
	GrapeSMv01_18g0228	42.0367	136.393	USP
	GrapeSMv01_02g0617	8.16333	115.81	TLP1
	GrapeSMv01_01g0780	140.8	321.65	GGAT2
	GrapeSMv01_12g0350	102.09	17.8067	NAAT1
	GrapeSMv01_11g0881	17.8967	67.96	TSS
	MSTRG.18169	3.23333	50.6133	IGHMBP2
	GrapeSMv01_03g0386	30.75	116.593	PHOT2
	GrapeSMv01_06g0982	37.6067	99.46	RPT2
	GrapeSMv01_08g1179	15.3033	76.2933	--
	GrapeSMv01_18g1924	42.55	6.59667	RPV1
	GrapeSMv01_07g0523	10.4567	37.2967	SR1IP1
	GrapeSMv01_02g0275	195.997	43.6167	ATL21A
	GrapeSMv01_04g0830	253	31.9333	AAE12
	GrapeSMv01_10g0865	100.71	19.29	CAD1
	GrapeSMv01_19g0509	23.29	72.6167	ATG18F
	GrapeSMv01_10g0119	37.3167	121.113	SS3
	GrapeSMv01_11g1149	62.7833	134.273	ACA10
	GrapeSMv01_05g0100	1.96667	25.81	BXL1
	GrapeSMv01_08g0627	30	109.277	ATPK2
	GrapeSMv01_05g0479	53.7167	143.71	VIT_05s0020g01830
	GrapeSMv01_18g0960	14.5633	66.3367	CXE2
	GrapeSMv01_12g1326	43.3067	213.19	SEND33
	GrapeSMv01_02g0091	12.39	40.29	GT-2
	MSTRG.22911	0.92	16.0367	ACD6
	GrapeSMv01_18g0796	41.9633	119.05	DAD2
	GrapeSMv01_05g1470	19.63	83.7467	BBX25
	GrapeSMv01_18g0879	675.957	1611.61	RD21B
	GrapeSMv01_14g0960	35.3533	1.75	AATP1
	GrapeSMv01_14g0551	16.8367	48.4667	AFP3
	GrapeSMv01_09g1164	53.84	6.40667	PGDH2
	GrapeSMv01_19g0053	22.9367	76.7933	2022-10-04
	GrapeSMv01_19g0237	56.2333	9.55667	--
	GrapeSMv01_08g1620	81.5967	206.96	CTPA3
	GrapeSMv01_18g2082	43.9433	100.293	CEPR2
	GrapeSMv01_17g0495	18.5333	55.4333	RPP8L2
	GrapeSMv01_17g0561	478.873	112.133	UAM1
	MSTRG.4325	75.2967	4.43667	--
	GrapeSMv01_11g0070	7.87	29.6	CCX4
	GrapeSMv01_18g0461	28.3833	69.2233	CRY1
	GrapeSMv01_16g0044	44.0833	116.09	--
	GrapeSMv01_13g0133	13.2033	51.88	DREB2C
	GrapeSMv01_19g0674	3.09333	94.1133	--
	GrapeSMv01_07g1342	9.40333	57.4733	CSE
	GrapeSMv01_06g1235	19.27	57.7333	At2g26850
	GrapeSMv01_13g0702	60.4567	4.20667	--
	GrapeSMv01_14g1613	49.8967	152.373	AHP1
	GrapeSMv01_06g0397	6.24333	23.94	PHOT1
	GrapeSMv01_17g0219	14.67	71.95	ltnD
	GrapeSMv01_04g1563	29.6733	5.39667	LECRK1
	GrapeSMv01_07g0804	152.627	26	ABR1
	GrapeSMv01_08g0529	3.94667	28.8833	mcfF
	GrapeSMv01_17g0616	30.48	2.32667	NPF2.11
	GrapeSMv01_13g0275	5.90333	24.87	SULTR4;2
	GrapeSMv01_16g0998	7.84667	47.03	--
	GrapeSMv01_07g1032	55.72	133.493	ACA12
	GrapeSMv01_10g0707	3.51333	39.6633	ROMT
	GrapeSMv01_09g0091	238.813	37.1267	CYP92C6
	GrapeSMv01_06g1031	41.04	3.12333	At5g22090
	GrapeSMv01_16g1350	35.7733	123.7	ATHB-12
	GrapeSMv01_05g0020	133.003	325.203	MFP2
	GrapeSMv01_04g0225	435.18	1105.97	PMA4
	GrapeSMv01_15g1156	427.463	77.3733	At3g61260
	GrapeSMv01_05g1028	16.72	56.54	BAM1
	GrapeSMv01_05g0128	8.67667	32.97	HCF107
	GrapeSMv01_10g1043	59.59	154.337	TCP2
	GrapeSMv01_08g0605	441.733	77.5567	LSAT_1X82001
	GrapeSMv01_11g1301	34.22	102.713	COL5
	GrapeSMv01_12g0648	66.2333	207.34	MIP1A
	GrapeSMv01_07g1206	62.2567	139.24	DCAF11
	GrapeSMv01_14g0876	51.5333	139.55	--
	GrapeSMv01_12g0089	24.1833	64.6867	PIF4
	GrapeSMv01_18g1726	57.7667	12.4733	CESA2
	GrapeSMv01_05g0603	41.6333	109.36	LACS6
	GrapeSMv01_10g1403	47.0267	179.683	--
	GrapeSMv01_15g0621	9.92	50.7533	TCP9
	GrapeSMv01_13g1621	71.6267	161.593	CCR1
	GrapeSMv01_14g1151	102.02	226.167	WRKY4
	GrapeSMv01_13g0072	83.9767	12.9633	FAD7A-1
	GrapeSMv01_09g1199	295.667	62.7233	--
	GrapeSMv01_14g1106	81.7367	15.22	--
	GrapeSMv01_05g0935	137.777	390.233	NPF5.2
	GrapeSMv01_03g0744	3.81667	24.66	--
	GrapeSMv01_13g1821	18.4767	61.4467	MFSD12
	GrapeSMv01_19g0337	30.3567	110.62	HGO
	GrapeSMv01_10g0768	39.2567	102.827	BHLH30
	GrapeSMv01_18g2417	34.27	6.78333	RPV1
	GrapeSMv01_12g0693	5.25	25.67	--
	GrapeSMv01_11g0477	90.51	11.5333	--
	GrapeSMv01_18g1365	139.09	25.7233	--
	GrapeSMv01_11g0296	15.8967	62.64	VPS15
	GrapeSMv01_04g0133	57.88	6.04667	WRKY50
	GrapeSMv01_08g0622	316.127	43.01	WRKY70
	GrapeSMv01_15g0968	206.903	36.4433	WRKY53
	GrapeSMv01_18g0892	53.85	129.423	ERF010
	GrapeSMv01_15g0517	42.8467	118.593	ELCL
	GrapeSMv01_01g0568	5.55667	30.1667	PCR2
	GrapeSMv01_06g1574	67.09	8.44333	NAC090
	GrapeSMv01_08g1583	705.827	1717.64	RFS2
	GrapeSMv01_14g1335	334.69	70.3733	CBP60D
	GrapeSMv01_07g0607	393.103	934.6	RD21A
	GrapeSMv01_14g0719	58.6133	191.017	--
	GrapeSMv01_09g1320	39.82	104.517	PHL6
	GrapeSMv01_04g1212	22.5433	69.4967	LPPE2
	GrapeSMv01_08g1309	16.06	45.6733	--
	GrapeSMv01_10g0701	46.41	153.067	GRXC9
	GrapeSMv01_18g1959	32.54	5.31333	RPV1
	GrapeSMv01_07g0280	19.7467	56.0667	SAPK2
	GrapeSMv01_02g0499	8.89333	36.4233	CYP75B137
	GrapeSMv01_12g0539	7.2	44.0167	DSP1
	GrapeSMv01_18g0270	221.053	690.727	NAC002
	GrapeSMv01_12g0397	20.9667	93.36	--
	GrapeSMv01_10g1119	166.353	34.97	CAT1
	GrapeSMv01_12g1141	12.9667	54.0867	GT6
	GrapeSMv01_17g0956	5.41667	31.6667	apaG
	GrapeSMv01_11g1293	36.0133	97.6033	COL5
	GrapeSMv01_06g0483	90.1	193.18	HSP70
	GrapeSMv01_01g0321	48.85	110.637	STN7
	GrapeSMv01_17g0853	39.2167	105.71	MYBS3
	GrapeSMv01_16g1198	47.6233	5.69667	LRK10
	GrapeSMv01_01g1133	38.0433	118.533	NAP2
	GrapeSMv01_10g0977	1.73	11.33	KAT2
	GrapeSMv01_01g1020	39.8833	95.85	TLP1
	GrapeSMv01_05g0347	19.2133	1.67	BOR2
	GrapeSMv01_10g1318	19.66	54.9033	HAK13
	GrapeSMv01_01g0583	64.6333	231.037	At1g06650
	GrapeSMv01_01g0207	27.49	81.6767	--
	GrapeSMv01_07g0531	4.55667	22.0533	CGLD27
	GrapeSMv01_16g0857	15.2733	48.1	At4g00755
	GrapeSMv01_08g1459	1.26667	13.69	XYL2
	GrapeSMv01_13g1569	5.05667	27.3467	CKX6
	GrapeSMv01_18g1227	9.24333	56.1633	GLOX1
	GrapeSMv01_03g1074	102.907	20.56	HVA22A
	GrapeSMv01_06g0532	41.56	116.867	TRP5
	GrapeSMv01_03g0422	11.9833	42.82	At2g16365
	GrapeSMv01_04g1191	51.7267	11.7967	PUB5
	GrapeSMv01_07g1573	13.4667	63.4067	RL3
	GrapeSMv01_17g0322	7.19667	84.6567	--
	GrapeSMv01_09g0706	17.1033	49.2467	GLPK
	GrapeSMv01_13g0845	31.1767	78.02	GAT1
	GrapeSMv01_12g0336	34.64	5.98333	HSL1
	GrapeSMv01_08g1585	62.5	162.457	SVR3
	GrapeSMv01_01g1638	7.81667	35.8733	BAG5
	GrapeSMv01_01g0329	9.65667	46.4767	HHO2
	GrapeSMv01_08g0386	40.0333	100.963	ASIL2
	GrapeSMv01_14g0120	16.1167	72.5367	At3g27150
	GrapeSMv01_05g0341	26.4933	83.84	At3g62260
	GrapeSMv01_16g1048	258.687	48.5767	HIPP39
	GrapeSMv01_06g0112	3.51667	52.6033	--
	GrapeSMv01_14g1127	13.6133	69.1967	NAC100
	GrapeSMv01_11g0855	35.9667	1.07333	SHT
	GrapeSMv01_16g0103	19.27	70.7667	At1g64890
	GrapeSMv01_04g0447	21.37	78.8833	--
	GrapeSMv01_14g1159	14.3233	52.05	--
	GrapeSMv01_05g0748	91.3533	215.317	At2g30620
	GrapeSMv01_05g1170	102.743	14.7833	GAE6
	GrapeSMv01_13g0261	7.36	28.44	EXO70H1
	GrapeSMv01_17g0884	27.1933	71.1467	UGT74B1
	GrapeSMv01_12g0356	349.463	897.107	ERF4
	GrapeSMv01_18g0548	15.9633	63.6367	DTX27
	GrapeSMv01_17g0775	23.2067	66.4433	BHLH72
	GrapeSMv01_15g0933	33.04	92.22	TSS
	GrapeSMv01_10g0327	82.4733	219.003	HIPP07
	GrapeSMv01_18g0839	4.71333	22.9567	At3g47570
	GrapeSMv01_11g0601	55.8967	133.59	SPS1
	GrapeSMv01_07g1310	2.73333	42.2733	TSPO
	MSTRG.12974	7.28667	21.0467	MIK2
	GrapeSMv01_18g1451	278.723	890.193	--
	GrapeSMv01_05g1282	73.14	16.5233	MLO1
	GrapeSMv01_11g1169	42.19	115.417	DBR
	GrapeSMv01_18g0514	89.7267	13.4567	PHI-1
	GrapeSMv01_16g0855	69.9267	140.723	SLK2
	GrapeSMv01_02g1045	32.0333	4.98667	JMJ706
	GrapeSMv01_16g1077	318.157	88.3133	SGT1
	GrapeSMv01_19g0298	20.8633	116.263	At5g53970
	GrapeSMv01_06g0331	10.3467	41.6367	At5g60370
	GrapeSMv01_06g0140	30.3767	122.84	BGLU12
	GrapeSMv01_01g0527	16.6633	52.7367	ESMD1
	GrapeSMv01_11g0173	126.13	36.3133	MKK2
	GrapeSMv01_09g0274	8.09667	140.573	--
	GrapeSMv01_07g1117	100.343	256.897	TIC
	GrapeSMv01_04g1115	2.40667	31.4033	At2g23790
	GrapeSMv01_17g0321	5.57333	62.8833	--
	GrapeSMv01_01g1231	13.7067	35.4867	PI4KG7
	GrapeSMv01_18g0903	27.1733	69.9133	NAC072
	GrapeSMv01_14g1075	37.9933	92.3267	BHLH062
	GrapeSMv01_13g0519	4.84333	30.1133	UGT709C2
	GrapeSMv01_12g1554	170.61	44.76	KOR
	GrapeSMv01_18g1598	2.29	653.897	LAC14
	GrapeSMv01_06g0088	22.2933	67.6667	--
	GrapeSMv01_09g0090	554.117	108.817	LOX3.1
	GrapeSMv01_18g1259	31.3967	63.59	XRN3
	GrapeSMv01_18g0554	39.7533	99.2633	PUP1
	GrapeSMv01_01g1119	7.63	30.0233	CDF3
	GrapeSMv01_15g0371	118.3	311.717	FLZ3
	GrapeSMv01_02g0841	208.993	31.9267	--
	GrapeSMv01_07g1367	72.49	157.71	SUS2
	GrapeSMv01_18g1932	14.82	49.67	ndhT
	MSTRG.21802	3.83333	37.63	--
	GrapeSMv01_08g1554	10.9933	61.0067	CHLH
	GrapeSMv01_07g1323	8.05667	36.1533	OsI_27296
	GrapeSMv01_12g0882	40.5433	86.2633	--
	GrapeSMv01_14g0530	69.8767	14.2567	FER
	GrapeSMv01_19g1046	107.807	218.497	GLO1
	GrapeSMv01_08g0356	7.55	26.2233	ERDJ3A
	GrapeSMv01_16g0938	88.3	183.637	CYB561A
	GrapeSMv01_07g0176	36.88	6.51333	At5g66900
	GrapeSMv01_14g0047	16.1933	57.33	At3g27150
	GrapeSMv01_06g0097	27.34	122.823	DIR19
	GrapeSMv01_02g0057	110.73	261	PYRP2
	GrapeSMv01_10g0178	1677.33	4443.17	--
	GrapeSMv01_07g0218	87.1	177.267	RAP2-4
	GrapeSMv01_01g0591	49.2433	101.397	VAC14
	GrapeSMv01_16g0108	31.06	2.20667	HSR201
	GrapeSMv01_18g2340	77.01	13.1133	ZED1
	GrapeSMv01_04g0175	27.5967	2.22	CKX7
	GrapeSMv01_13g0312	24.0267	73.92	--
	GrapeSMv01_18g1123	349.827	89.4233	At2g16250
	GrapeSMv01_06g1377	49.96	115.52	4CLL7
	GrapeSMv01_14g0213	93.4467	18.8933	--
	GrapeSMv01_12g0707	72.57	10.0633	MYB4
	GrapeSMv01_04g1329	210.867	62.9967	CPK28
	GrapeSMv01_05g0754	21.7	47.6033	--
	GrapeSMv01_18g1800	4.28	17.9433	ABCG25
	GrapeSMv01_18g0810	83.9733	195.697	--
	GrapeSMv01_06g1298	41.88	94.46	--
	GrapeSMv01_08g1517	51.4533	11.1367	ACA4
	GrapeSMv01_13g1331	24.5067	61.76	CYP734A2
	GrapeSMv01_17g0630	119.617	240.24	HIR1
	GrapeSMv01_01g0424	19.16	48.5833	--
	GrapeSMv01_11g0850	27.7333	65.7667	2022-08-08
	GrapeSMv01_01g1069	83.0167	18.2033	UTR3
	GrapeSMv01_03g0665	7.59	31.58	COR27
	GrapeSMv01_06g1487	102.49	246.737	PDR2
	GrapeSMv01_15g0776	71.15	13.7233	NTL9
	GrapeSMv01_01g0482	9.35	41.4467	--
	GrapeSMv01_10g0730	38.8533	5.28	GLR2.7
	GrapeSMv01_05g0778	4.31667	21.13	CSLG2
	GrapeSMv01_12g0075	108.573	251.407	JUB1
	GrapeSMv01_02g0258	88.5467	206.197	UGE5
	GrapeSMv01_06g0680	4.24333	40.9267	At2g29260
	GrapeSMv01_06g0142	6.8	41.0767	BGLU12
	GrapeSMv01_16g0225	3.58667	40.2833	GDH
	GrapeSMv01_04g0283	50.2	8.19667	NAGK
	GrapeSMv01_15g1035	64.4833	154.507	RHB1A
	GrapeSMv01_08g0849	36.43	80.5133	--
	GrapeSMv01_19g1139	19.44	405.51	NAC021
	GrapeSMv01_11g0416	4.31333	38.7533	--
	GrapeSMv01_01g0279	10.34	37.6567	ICMEL1
	GrapeSMv01_14g1146	51.2767	115.683	KIN10
	GrapeSMv01_05g1658	44.8567	2.68333	AVT1H
	GrapeSMv01_03g0043	34.4233	99.25	COR27
	GrapeSMv01_08g1031	8.82667	44.0733	At2g29150
	GrapeSMv01_14g0749	22.45	66.2233	At5g40670
	GrapeSMv01_18g1134	20.41	2.41333	PUB5
	GrapeSMv01_07g0520	15.1733	1.39333	--
	GrapeSMv01_05g1120	37.1433	79.99	sll0005
	GrapeSMv01_01g1015	20.89	61.6	HOX16
	GrapeSMv01_15g1021	19.5967	57.1	sld1
	GrapeSMv01_16g0150	68.02	17.7733	CSLD3
	GrapeSMv01_14g1264	28.78	69.4667	ABCI20
	GrapeSMv01_19g0299	18.6667	57.1067	DAAT
	GrapeSMv01_13g0862	30.8667	83.89	INVE
	GrapeSMv01_10g0643	11.3533	47.23	UBC24
	GrapeSMv01_18g0720	427.023	110.387	PSK3
	GrapeSMv01_15g0970	0.936667	372.06	ANR
	GrapeSMv01_07g1041	24.3533	80.5967	HSFA2D
	GrapeSMv01_12g0018	44.1167	6.76	GAUT15
	GrapeSMv01_12g0424	49.6367	8.24	PORA
	GrapeSMv01_07g0663	35.68	4.79333	--
	GrapeSMv01_11g0699	3.15333	14.3767	CRK35
	GrapeSMv01_06g1463	67.87	181.097	--
	MSTRG.3957	23.06	1.54	--
	GrapeSMv01_02g0601	37.2033	4.49667	DTX49
	GrapeSMv01_04g1653	7.69333	79.0933	--
	GrapeSMv01_11g0912	78.6367	16.1733	CER3
	GrapeSMv01_10g1401	70.5867	186.633	--
	GrapeSMv01_10g0270	177.357	21.4167	--
	GrapeSMv01_10g0491	2.46667	14.1267	At1g11300
	GrapeSMv01_19g0153	41.7667	91.8533	CNGC4
	GrapeSMv01_05g1167	20.91	1.98667	BHLH62
	GrapeSMv01_17g0738	21.8433	53.1	LONRF2
	GrapeSMv01_13g1330	4.54667	16.0233	RGA3
	GrapeSMv01_01g1567	83.0033	177.087	At1g67360
	GrapeSMv01_04g1244	20.2533	104.96	--
	GrapeSMv01_06g0389	243.257	67.0667	NTF6
	GrapeSMv01_11g1292	17.69	1.10333	Os07g0190000
	GrapeSMv01_05g0231	20.29	49.94	PDK
	GrapeSMv01_19g0993	55.6533	113.373	CYP72A225
	GrapeSMv01_09g0276	16.8833	46.8733	At2g19230
	GrapeSMv01_03g1098	93.7533	16.3233	WAKL2
	GrapeSMv01_14g0310	17.2233	41.3267	LRK10L-1.3
	GrapeSMv01_18g1355	35.2833	114.487	SKP2B
	GrapeSMv01_14g1997	58.0467	10.8167	PCS1
	GrapeSMv01_02g0805	32.1033	76.6933	PVA21
	GrapeSMv01_01g1077	44.72	122.657	--
	GrapeSMv01_07g0075	5.54	27.9733	--
	GrapeSMv01_08g0291	70.27	14.8833	CPK1
	GrapeSMv01_13g0359	5.37	23.4367	ACT1
	GrapeSMv01_01g0530	104.193	19.0767	--
	GrapeSMv01_16g1105	60.2867	10.6	MAKR5
	GrapeSMv01_04g0218	15.3967	43.49	AFR
	GrapeSMv01_16g1200	113.16	29.86	LRK10
	GrapeSMv01_08g1632	18.9533	1.88	--
	GrapeSMv01_19g1290	7.21333	34.7	MYB58
	GrapeSMv01_06g1376	68.76	13.4067	HIPP03
	GrapeSMv01_18g1532	25.83	65.9967	FAB1D
	GrapeSMv01_03g1008	4.90333	19.8833	CYP714C2
	GrapeSMv01_07g2165	1.99	19.0667	--
	GrapeSMv01_18g1386	7.86333	56.4267	SWEET1
	GrapeSMv01_18g1697	38.7267	95.5667	PER12
	GrapeSMv01_08g1529	71.1667	145.547	MUCI21
	GrapeSMv01_13g0174	1.01	28.7367	--
	GrapeSMv01_09g0990	59.9367	127.64	CCR1
	GrapeSMv01_06g1047	46.4767	9.04	yjlD
	GrapeSMv01_04g0270	19.1533	48.3633	At4g31240
	GrapeSMv01_17g0255	36.3333	4.68333	NMT2
	GrapeSMv01_05g0734	101.333	14.8433	AUX22D
	GrapeSMv01_07g1389	49.94	108.097	NDT1
	GrapeSMv01_08g0032	21.6833	54.72	PILS6
	GrapeSMv01_01g1616	29.1167	74.1833	DPL1
	GrapeSMv01_13g0163	0.716667	33.1133	LBD15
	GrapeSMv01_01g0371	41.25	6.76667	COL16
	GrapeSMv01_08g1775	3.74333	11.35	LAC11
	GrapeSMv01_12g1404	4.16667	33.73	DMP3
	GrapeSMv01_18g0587	599.477	156.713	PUMP5
	GrapeSMv01_14g0525	23.0933	2.41667	FER
	GrapeSMv01_06g1229	17.8667	46.5067	HMGCL
	GrapeSMv01_Sca0285	54.5733	129.56	SUS2
	GrapeSMv01_09g1042	20.8433	2.42	RUN1
	GrapeSMv01_03g0587	10.5533	44.96	At5g05600
	GrapeSMv01_19g0072	4.38333	20.1333	At4g27290
	GrapeSMv01_06g0605	19.4067	62.19	--
	GrapeSMv01_01g0762	15.7833	37.3267	PHT2-1
	GrapeSMv01_02g0479	17.06	45.4033	INVA
	GrapeSMv01_18g0954	10.5267	29.4967	--
	GrapeSMv01_19g0129	20.3067	54.5467	--
	GrapeSMv01_06g0418	6.1	41.8767	--
	GrapeSMv01_18g0676	16.9067	52.33	AAP6
	GrapeSMv01_01g0722	1.26333	19.48	CYP71B35
	GrapeSMv01_05g1334	18.3967	48.3567	BT3
	GrapeSMv01_09g0331	10.2433	49.9667	--
	GrapeSMv01_08g1452	4.65667	23.0867	MYB36
	GrapeSMv01_05g0181	29.36	80.14	GA2OX2
	GrapeSMv01_11g0846	22.1367	68.9067	HSP70
	GrapeSMv01_06g1413	139.84	319.167	PAO
	GrapeSMv01_13g1688	27.3033	4.84	CESA3
	GrapeSMv01_17g0066	28.2833	66.1333	FAM214B
	GrapeSMv01_08g1843	12.68	38.35	SDP1
	GrapeSMv01_19g0488	8.07333	28.7833	CRLK1
	GrapeSMv01_08g0440	2.97	27.1967	SDR2a
	GrapeSMv01_13g0720	42.58	88.0667	--
	GrapeSMv01_07g0716	67.67	7.58333	HIPP23
	GrapeSMv01_12g1254	3.06	134.183	--
	GrapeSMv01_15g1075	84.2833	191.15	HIPP39
	GrapeSMv01_12g0580	11.48	34.37	--
	GrapeSMv01_10g0449	37.5633	5.19	TPS13
	MSTRG.15237	10.42	25.0267	--
	GrapeSMv01_12g0210	36.8033	125.267	CAJ1
	GrapeSMv01_14g0331	31.4833	95.81	abhd17b
	GrapeSMv01_12g1119	0.85	127.61	WRKY9
	GrapeSMv01_16g1049	274.967	52.4067	HIPP39
	GrapeSMv01_17g1036	359.293	110.977	--
	GrapeSMv01_02g0116	8.66	48.56	DLO2
	GrapeSMv01_02g0887	142.67	22.65	NCS1
	GrapeSMv01_01g0613	19.21	40.7033	TPS6
	GrapeSMv01_13g0125	57.65	143.473	FER2
	GrapeSMv01_09g0377	17.1533	45.86	AAE13
	GrapeSMv01_14g1916	186.843	49.3433	THA1
	GrapeSMv01_15g0646	11.5733	37.0667	CYP76T24
	GrapeSMv01_12g1283	40.2933	85.0567	--
	GrapeSMv01_07g0262	45.73	94.5733	UGT85K5
	GrapeSMv01_08g1842	20.09	3.28333	PICBP
	GrapeSMv01_07g1839	45.85	7.71	PED1
	GrapeSMv01_18g0419	38.0267	85.0267	SULTR1;3
	GrapeSMv01_01g0959	36.14	6.14333	JGB
	GrapeSMv01_04g0090	158.65	33.7733	IQM4
	GrapeSMv01_18g0253	24.0933	53.5433	--
	GrapeSMv01_12g1249	3.27333	122.367	--
	GrapeSMv01_05g0437	34.7033	8.71333	SRC2
	GrapeSMv01_02g0277	90.3667	208.55	LACS4
	GrapeSMv01_18g1236	1.21333	50.2233	CYP71A1
	GrapeSMv01_03g0490	156.19	419.513	PLT5
	GrapeSMv01_07g1232	13.5667	30.7633	DEGP2
	GrapeSMv01_18g1780	13.5567	37.62	ERF1-3
	GrapeSMv01_04g0094	40.3533	92.3967	HSF30
	GrapeSMv01_06g1449	118.023	27.7	AXS2
	GrapeSMv01_03g0222	16.3167	42.0267	--
	GrapeSMv01_18g0083	44.6867	110.147	OPR2
	GrapeSMv01_12g0033	49.1933	104.157	ML2
	GrapeSMv01_09g0360	115.607	19.6833	TIP2-1
	GrapeSMv01_09g1053	208.067	47.62	WRKY40
	GrapeSMv01_14g0028	27.6733	56.18	ALS
	GrapeSMv01_Sca0135	2.45333	15.4233	BBX19
	GrapeSMv01_08g1448	60.5467	175.54	METK3
	GrapeSMv01_09g1223	21.4267	69.84	MIP1A
	GrapeSMv01_13g0250	24.8233	3.18667	At5g59700
	GrapeSMv01_18g0116	15.8433	40.61	--
	GrapeSMv01_08g0460	0.546667	10.2633	At3g08860
	GrapeSMv01_08g0354	34.02	72.6233	RANBP1B
	GrapeSMv01_18g1194	13.5067	37.6567	RD21B
	GrapeSMv01_10g0541	22.3067	45.61	Os07g0563300
	GrapeSMv01_03g0586	0.596667	23.6367	-
	GrapeSMv01_06g0714	23.5467	79.1333	--
	GrapeSMv01_05g0376	19.6433	47.3667	PDK
	GrapeSMv01_12g0500	9.67333	44.27	CSLH1
	GrapeSMv01_17g0134	15.6867	58.62	WRKY75
	GrapeSMv01_14g1570	16.99	3.43333	At4g27220
	GrapeSMv01_01g0894	17.3667	63.4167	PUB18
	GrapeSMv01_18g0928	19.78	51.3067	COR27
	GrapeSMv01_18g1239	72.2767	179.69	CYP83B1
	GrapeSMv01_06g0161	25.6867	2.26333	UGT92A1
	GrapeSMv01_05g0184	9.51333	39.74	MYB108
	GrapeSMv01_05g1743	144.19	24.9833	UGT75L6
	GrapeSMv01_02g0734	8.2	30.5067	PURU2
	GrapeSMv01_13g0512	1.23667	15.8467	UGT709C2
	GrapeSMv01_14g1211	17.57	2.83333	PIL15
	GrapeSMv01_08g0793	45.7667	136.917	--
	GrapeSMv01_18g1446	161.217	426.31	--
	GrapeSMv01_06g0143	69.4367	19.3333	LOX2.1
	GrapeSMv01_04g0567	24.8467	1.84333	ERF003
	GrapeSMv01_06g0204	58.0533	10.7867	ALDH3F1
	GrapeSMv01_13g0367	37.5167	1.97667	--
	GrapeSMv01_07g0777	89.3	12.9467	WRKY51
	GrapeSMv01_05g0295	10.9033	28.35	At3g16560
	GrapeSMv01_06g0489	210.617	64.5867	HSP70
	GrapeSMv01_07g0969	20.2367	2.28	CYP94A1
	GrapeSMv01_06g0654	15.6167	36.1733	FTSH9
	GrapeSMv01_09g0264	14.1133	0.833333	At2g19230
	GrapeSMv01_13g0385	43.7433	94.42	TRP4
	GrapeSMv01_10g0166	14.85	1.51333	SRF8
	GrapeSMv01_07g0566	27.5533	56.2167	CYP81Q32
	GrapeSMv01_11g0096	99.64	30.79	OFUT35
	GrapeSMv01_09g0271	18.9433	4.95667	At2g19210
	GrapeSMv01_10g1108	25.99	66.8767	ABCC2
	GrapeSMv01_08g0556	1.03	19.54	SDR2a
	GrapeSMv01_11g0629	111.507	35.12	PAT24
	GrapeSMv01_09g0326	31.76	93.1433	MODA
	GrapeSMv01_08g0573	0.33	9.71333	At3g08860
	MSTRG.18631	24.77	3.09333	LRK10
	GrapeSMv01_04g0266	11.63	42.1433	GGCT2;2
	GrapeSMv01_06g0612	26.3867	3.19333	--
	GrapeSMv01_05g0246	48.9467	8.15	DGAT3
	GrapeSMv01_19g1378	196.82	45.36	AMC4
	GrapeSMv01_02g0903	62.76	13.13	PRS1
	GrapeSMv01_13g1749	34.4333	85.47	OFUT20
	GrapeSMv01_01g0495	13.4567	40.6433	HIPP21
	GrapeSMv01_03g0789	82.1067	612.963	ZAT10
	GrapeSMv01_16g1175	66.07	8.88667	WRKY53
	GrapeSMv01_13g0083	62.8633	12.4367	At2g30020
	GrapeSMv01_12g0382	2.32333	10.0733	SPA3
	GrapeSMv01_17g1093	30.5133	64.54	BT1
	GrapeSMv01_10g0409	5.63667	21.1767	CRK29
	GrapeSMv01_12g1156	37.0933	5.71333	RUN1
	GrapeSMv01_14g1117	15.1233	48.8433	CDF2
	GrapeSMv01_06g0770	15.28	32.85	FTSH9
	GrapeSMv01_14g0756	18.9867	46.4167	At3g27390
	GrapeSMv01_04g0238	17.9	57.92	--
	GrapeSMv01_05g0527	20.5767	62.3	MSRB5
	GrapeSMv01_18g1237	19.6467	46.6767	CYP71A1
	GrapeSMv01_05g1673	6.70667	29.7733	Os04g0338000
	GrapeSMv01_07g0029	31.1767	5.05333	--
	GrapeSMv01_06g0839	69.7933	176.93	At2g30020
	GrapeSMv01_06g0821	49.63	12.2533	PLC4
	GrapeSMv01_18g1626	27.5433	62.8733	At1g71810
	GrapeSMv01_10g0470	34.6533	70.5933	PUB8
	GrapeSMv01_01g0033	25.6467	55.1867	AFP2
	GrapeSMv01_01g1018	19.45	41.1433	NPF4.6
	GrapeSMv01_14g0528	110.457	31.2667	FER
	GrapeSMv01_01g0772	5.34	18.49	DTX29
	GrapeSMv01_17g0540	18.5633	42.18	DOF5.4
	GrapeSMv01_16g0132	54.3967	11.4033	SYP21
	GrapeSMv01_10g0424	47.05	113.693	CXXS1
	GrapeSMv01_13g0311	22.0867	69.7	ZAT12
	GrapeSMv01_07g0707	100.487	29.2933	PAT
	GrapeSMv01_14g1612	16.8367	37.92	ATG18H
	GrapeSMv01_11g0843	1.32667	21.72	--
	GrapeSMv01_11g1171	13.1633	39.18	DBR
	GrapeSMv01_04g0444	1.22	52.1533	KCS11
	GrapeSMv01_17g0129	81.18	17.5633	At5g63520
	GrapeSMv01_13g0366	47.3267	5.69667	--
	GrapeSMv01_09g0139	4.57667	14.9133	SLC25A44
	GrapeSMv01_03g0458	19.5767	47.9533	At1g63850
	GrapeSMv01_04g1107	13.4633	43.1133	LYK4
	GrapeSMv01_17g0835	24.7133	2.71333	EDS1
	GrapeSMv01_11g1226	43.2467	89.8	--
	GrapeSMv01_05g1286	20.4967	44.9733	--
	GrapeSMv01_04g1217	34.0367	1.56	SAMT
	GrapeSMv01_Sca0134	61.05	16.0833	GMD1
	GrapeSMv01_14g1237	504.623	192.943	METK4
	GrapeSMv01_07g1512	67.8067	136.61	--
	MSTRG.5935	16.27	1.57	NPF5.5
	GrapeSMv01_06g1494	26.6933	4.67333	AGC1-5
	GrapeSMv01_01g0640	33.67	8.63333	ALKBH10B
	GrapeSMv01_10g0660	21.24	49.3033	SMG7L
	GrapeSMv01_05g0443	13.4033	32.0133	At3g16560
	GrapeSMv01_09g0767	126.647	39.1433	TPR1
	GrapeSMv01_11g0279	28.91	67.1833	GGT3
	GrapeSMv01_02g0390	23.0933	54.6667	HSP83A
	GrapeSMv01_19g1080	25.6867	93.65	PARA
	GrapeSMv01_14g0022	9.30667	25.2067	--
	GrapeSMv01_10g0365	8.23667	18	WRKY46
	GrapeSMv01_18g2461	220.167	76.6933	LHCB5
	GrapeSMv01_07g1398	6.18333	20.0533	GATL7
	GrapeSMv01_19g0921	3.71333	22.0767	At5g56260
	GrapeSMv01_02g1219	110.85	223.633	NIT4B
	GrapeSMv01_03g1046	17.3733	49.9933	--
	GrapeSMv01_03g1099	68.7967	11.04	WAK2
	GrapeSMv01_15g0878	3.56333	15.7	PRCP
	GrapeSMv01_18g0493	30.6767	73.16	CRY1
	GrapeSMv01_11g0606	12.19	29.6267	PAP26
	GrapeSMv01_11g0476	47.6067	8.71667	AKT1
	GrapeSMv01_18g0204	80.21	22.54	At5g64030
	GrapeSMv01_01g1360	146.877	52.52	--
	GrapeSMv01_07g0998	36.6333	5.77333	At2g30550
	GrapeSMv01_18g1170	22.3267	2.83667	CYCT1-1
	GrapeSMv01_05g0721	18.7533	2.12	KCS11
	GrapeSMv01_05g0144	20.1567	50.8767	ECHIA
	GrapeSMv01_10g0479	6.35333	23.1033	At1g11410
	GrapeSMv01_15g1081	37.2067	84.78	UBC4
	GrapeSMv01_18g2228	20.8333	3.14333	N
	GrapeSMv01_14g0314	41.1433	84.8467	HACL
	GrapeSMv01_13g1526	13.1133	40.5867	ABA2
	GrapeSMv01_18g0533	22.2367	2.9	qtrt1
	GrapeSMv01_01g0394	138.25	48.6467	OVA9
	GrapeSMv01_06g0448	5.78667	24.3533	MYBAS2
	GrapeSMv01_14g0511	179.79	45.3067	FER
	GrapeSMv01_04g0018	61.0667	2.73333	CLV1A
	GrapeSMv01_18g0701	15.46	36.3667	SQE1
	GrapeSMv01_02g1356	22.57	223.537	CCD4
	GrapeSMv01_07g2008	19.0633	1.37667	RPV1
	GrapeSMv01_05g0708	15.9533	3.98667	ACA13
	GrapeSMv01_04g0592	28.88	76.31	memo1
	GrapeSMv01_09g0154	32.02	9.20667	ALA7
	GrapeSMv01_01g0954	131.363	43.05	ATJ16
	GrapeSMv01_07g0041	16.6633	1.51333	--
	GrapeSMv01_05g0189	22.2767	492.39	GOLS2
	GrapeSMv01_05g0384	30.22	62.9933	CIPK1
	GrapeSMv01_03g1264	7.34333	23.5167	At4g20840
	GrapeSMv01_18g1958	21.3633	2.28333	--
	GrapeSMv01_05g1097	1.26667	5.6	DDB_G0267514
	GrapeSMv01_01g0973	25.6167	58.7667	RCOM_0699480
	GrapeSMv01_06g0619	4.51	18.2367	UGT76A2
	MSTRG.10316	14.4367	0.63	At2g19230
	GrapeSMv01_19g0659	13.12	45.6567	MPC4
	GrapeSMv01_16g0483	46.84	110.38	--
	GrapeSMv01_02g0253	30.8567	7.03333	PI4KG4
	GrapeSMv01_05g0608	84.2533	168.743	TIC
	GrapeSMv01_13g0674	30.3667	71.0967	At2g39020
	GrapeSMv01_11g0205	26.32	3.21333	BHLH41
	GrapeSMv01_17g1056	21.7633	61.45	CYP736A117
	GrapeSMv01_04g1485	31.1633	3.18667	MO2
	GrapeSMv01_18g1879	0.593333	8.94333	LAC9
	GrapeSMv01_19g0433	19.9167	47.4033	YSC84
	GrapeSMv01_05g0394	47.8467	7.33	DGAT3
	GrapeSMv01_13g0632	104.557	32.73	LHCA1
	GrapeSMv01_01g0767	18.4	46.0333	ABCB26
	GrapeSMv01_17g0539	31.8267	4.62	--
	GrapeSMv01_10g0661	20.46	52.79	--
	GrapeSMv01_08g0823	1.47333	8.76333	LECRK81
	GrapeSMv01_10g0558	43.7667	7.19333	NDA1
	GrapeSMv01_07g0711	39.05	8.21333	AAO
	GrapeSMv01_18g2393	8.97	0.946667	RPV1
	GrapeSMv01_17g0544	62.79	10.2867	DIR23
	GrapeSMv01_07g1065	1.38667	13.2167	NEK2
	GrapeSMv01_16g1193	4.28333	12.23	PKP4
	GrapeSMv01_03g0602	7.75333	22.88	EFM
	GrapeSMv01_16g1362	51.3667	11.8633	mfsd5
	GrapeSMv01_01g0359	29.2567	65.6767	NPF3.1
	GrapeSMv01_18g1004	33.3533	68.5467	At1g47710
	GrapeSMv01_09g1290	12.91	0.81	OSCPNY1
	GrapeSMv01_18g0295	21.6733	47.9667	--
	GrapeSMv01_17g0885	34.3933	70.35	At5g50100
	GrapeSMv01_03g0933	60.4333	181.877	PR1B1
	GrapeSMv01_04g0465	4.75667	14.6533	LE
	GrapeSMv01_02g0406	176.243	59.0333	--
	GrapeSMv01_07g0894	35.7933	6.66667	AMT3-1
	GrapeSMv01_01g0761	27.9067	58.9633	--
	GrapeSMv01_19g0711	31.8767	5.97667	--
	GrapeSMv01_04g0272	7.04333	29.34	--
	GrapeSMv01_09g0411	4.96	21.58	BAC2
	GrapeSMv01_11g1286	2.86	13.6733	F3GT2
	GrapeSMv01_11g0188	13.4	29.32	LUT2
	GrapeSMv01_Sca0259	181.33	58.9533	UGD1
	GrapeSMv01_18g1666	68.3367	18.88	IP5P3
	GrapeSMv01_09g0430	1.64	18.4	Copb2
	GrapeSMv01_02g1209	0.293333	22.7467	NIT4B
	GrapeSMv01_14g1689	17.6933	45.52	TIR1
	GrapeSMv01_08g1046	40.3133	99.9	--
	GrapeSMv01_05g0585	11.5033	33.47	PNC1
	GrapeSMv01_06g0370	38.22	77.4667	TET4
	GrapeSMv01_18g1533	17.8333	44.7367	FAB1D
	GrapeSMv01_18g1647	13.5467	35.73	--
	GrapeSMv01_02g0531	29.4167	7.03333	KINUB
	GrapeSMv01_09g1254	24.22	3.27667	At3g20240
	GrapeSMv01_01g0839	72.6167	20.6567	At1g60420
	GrapeSMv01_08g1165	22.0867	49.4467	CPRD49
	GrapeSMv01_01g0398	37.6433	6.5	--
	GrapeSMv01_12g0622	21.7167	5.05667	GLR3.7
	GrapeSMv01_19g0710	218.35	69.7267	PAT1
	GrapeSMv01_04g1710	117.46	31.8533	PILS3
	GrapeSMv01_03g0645	19.0333	39.6933	ATG2
	GrapeSMv01_05g1704	11.7267	29.6533	ypfD
	GrapeSMv01_11g0103	11.7267	29.6533	ypfD
	GrapeSMv01_06g0252	7.98667	18.42	BLH8
	GrapeSMv01_16g1197	24.12	2.95	LRK10
	GrapeSMv01_07g0144	0.54	8.98333	JGB
	GrapeSMv01_08g0700	2.32	47.3633	At5g07050
	GrapeSMv01_07g1571	1.63333	10.91	TPK5
	GrapeSMv01_17g0564	23.3433	1.91667	COB
	GrapeSMv01_08g1129	13.3533	38.0333	SQD2
	GrapeSMv01_13g0655	36.05	7.95	ARF18
	GrapeSMv01_06g0724	26.24	4.52333	--
	GrapeSMv01_10g0445	16.08	1.31333	TPS13
	GrapeSMv01_06g0539	25.1433	54.42	--
	GrapeSMv01_08g1586	84.5967	178.267	REM4.1
	GrapeSMv01_02g0295	4.01667	22.7167	ANR
	GrapeSMv01_08g0265	55.7633	15.67	FLA17
	GrapeSMv01_02g0239	104.06	218.37	CSLG3
	GrapeSMv01_08g1159	11.49	27.4467	AIRP2
	GrapeSMv01_09g0233	5.69	22.62	ABCC8
	GrapeSMv01_18g0275	82.6433	18.2867	ASP1
	GrapeSMv01_03g0542	0.503333	10.6367	CYP82C4
	GrapeSMv01_05g1148	2.43667	13.57	ERF062
	GrapeSMv01_01g1390	11.2633	3.13667	Trank1
	GrapeSMv01_16g1081	17.1833	40.76	UGT88A1
	GrapeSMv01_04g1219	45.63	3.33	-
	GrapeSMv01_07g2154	13.65	30.5067	CBP1
	GrapeSMv01_14g1231	0.636667	11.9767	PDK
	GrapeSMv01_13g1381	73.74	158.757	--
	GrapeSMv01_02g0215	1.27667	6.12	CSLG3
	GrapeSMv01_14g1435	14.5067	33.24	MGP
	GrapeSMv01_07g1328	10.3167	31.0667	EID1
	GrapeSMv01_04g0538	2.68333	47	ACR2
	GrapeSMv01_02g0630	47.25	108.307	HSFB2A
	GrapeSMv01_18g0413	5.4	20.4533	HIPP23
	GrapeSMv01_13g1336	61.5	12.7867	CXE6
	GrapeSMv01_04g0340	5.45667	13.7567	EMF1
	GrapeSMv01_12g0650	6.71	18.2433	--
	GrapeSMv01_17g1067	3.07	20.08	CYP736A117
	GrapeSMv01_07g0160	57.9967	10.3767	SABP2
	GrapeSMv01_10g0273	40.1767	1.3	--
	GrapeSMv01_12g0079	1.20667	18.4733	At1g14600
	GrapeSMv01_05g1320	45.83	13.0633	ILK1
	GrapeSMv01_19g0769	5.58	22.1533	BAM4
	GrapeSMv01_07g1481	3.78333	10.52	--
	GrapeSMv01_01g1186	57.3333	130.177	PCAP1
	GrapeSMv01_13g0436	17.4433	42.1867	RCA
	GrapeSMv01_01g0635	82.2567	26.42	OBE3
	GrapeSMv01_01g0625	18.72	3.49	At1g34300
	GrapeSMv01_14g1720	30.5267	72.9	rd2
	GrapeSMv01_11g0083	13.87	36.83	RIPK
	GrapeSMv01_18g1223	155.383	46.9733	At4g24160
	GrapeSMv01_14g1272	493.84	138.1	GOLS2
	GrapeSMv01_11g1110	7.92	20.5433	CIA2
	GrapeSMv01_14g0094	10.53	28.42	--
	GrapeSMv01_01g0952	86.3267	23.0967	ILL1
	GrapeSMv01_18g0910	20.9733	3.73333	sbt3
	GrapeSMv01_18g0820	63.0533	20.3467	At4g33920
	GrapeSMv01_13g0161	2.99333	12.5633	NPF5.1
	GrapeSMv01_03g0211	21.5967	52.89	--
	GrapeSMv01_01g1202	23.6967	3.26333	ctps1
	GrapeSMv01_08g0851	5.52333	20.8	IP5P8
	GrapeSMv01_07g1474	24.45	3.98333	GPAT3
	GrapeSMv01_09g0049	80.84	173.193	At1g54070
	GrapeSMv01_06g0344	35.7133	71.48	TET4
	GrapeSMv01_05g0289	175.527	51.75	SRC2
	GrapeSMv01_18g0278	227.087	88.4033	PDI
	GrapeSMv01_14g0629	29.94	6.57	AK2
	GrapeSMv01_08g1636	8.10333	23.7667	algE1
	GrapeSMv01_05g0191	61.19	123.353	HS1
	GrapeSMv01_11g0350	22.5033	62.0767	BHLH68
	GrapeSMv01_07g1495	14.4133	53.6667	GOLS2
	GrapeSMv01_01g1646	96.2667	29.9133	PBS1
	GrapeSMv01_14g0924	0.18	9.83667	DOX1
	GrapeSMv01_04g1443	5.36667	33.2967	SSL5
	GrapeSMv01_13g1568	31.86	6.60667	Os01g0939600
	GrapeSMv01_18g0849	0.153333	12.4767	CYP81Q32
	GrapeSMv01_18g0251	73.0433	151.503	AAP3
	GrapeSMv01_06g1469	100.637	27.2967	ADT3
	GrapeSMv01_07g0621	8.91667	25.9767	AP2
	GrapeSMv01_14g1571	21.2167	3.73	At5g63020
	GrapeSMv01_01g0611	32.5033	76.4167	At1g14780
	GrapeSMv01_18g1003	98.2633	33.6367	NAT3
	GrapeSMv01_Sca0158	16.8567	48.8	--
	GrapeSMv01_18g0819	32.16	7.09	--
	GrapeSMv01_01g0572	2.05	13.1233	SKIP28
	GrapeSMv01_05g1213	1.04667	8.57667	ACD6
	GrapeSMv01_07g1568	41.67	90.5	ABCB11
	GrapeSMv01_03g0011	39.1933	7.82	PAP
	GrapeSMv01_05g0718	8.77	17.7033	--
	GrapeSMv01_12g0145	0.836667	59.7967	At5g44400
	GrapeSMv01_02g0595	35.8333	8.19	UTR4
	GrapeSMv01_10g0042	198.243	60.3767	GPT2
	GrapeSMv01_02g0385	229.82	73.3133	HIPP39
	GrapeSMv01_13g1080	93.8033	32.27	CPK1
	GrapeSMv01_03g1101	48.9267	12.95	WAKL2
	GrapeSMv01_09g0232	7.83	16.65	SELMODRAFT_444075
	GrapeSMv01_18g1778	81.87	22.9933	PXC3
	GrapeSMv01_16g1412	15.6367	1.58667	PME34
	GrapeSMv01_18g1916	8.44667	122.533	TT10
	GrapeSMv01_01g0750	25.8633	82.33	XERICO
	GrapeSMv01_04g0454	39.32	4.69333	--
	GrapeSMv01_12g0113	3.86667	52.2933	TBL43
	GrapeSMv01_01g0596	20.4967	4.39667	MAP70.2
	GrapeSMv01_18g1620	0.293333	10.3433	TT10
	GrapeSMv01_10g1030	98.2233	20.0467	TIFY5A
	GrapeSMv01_19g0607	17.4067	1.17	GGPS
	GrapeSMv01_18g0771	47.3333	13.97	--
	GrapeSMv01_05g0610	25.5233	6.49333	LOX1.5
	GrapeSMv01_14g0269	24.08	3.26667	UGT89A2
	GrapeSMv01_03g0390	9.51333	19.91	CLC-E
	GrapeSMv01_11g0676	8.59333	20.47	STP7
	GrapeSMv01_03g0313	563.52	144.53	AATL1
	GrapeSMv01_19g0574	39.42	82.9267	--
	GrapeSMv01_06g0956	1.93333	9.57	--
	GrapeSMv01_07g2120	32.8733	7.84667	At5g48380
	GrapeSMv01_08g0880	21.77	47.7033	--
	GrapeSMv01_14g1404	2.92	20.7567	HSP26-A
	GrapeSMv01_07g0911	11.0167	22.21	DDB_G0282237
	GrapeSMv01_18g0562	223.287	66.6	STR6
	GrapeSMv01_07g2067	54.8767	14.93	CHIP
	GrapeSMv01_14g0626	115.603	19.8433	LIR1
	GrapeSMv01_07g2105	12.8933	27.37	CBP1
	GrapeSMv01_04g0511	29.71	6.97667	RDR6
	GrapeSMv01_15g0504	10.6867	26.37	UNE10
	GrapeSMv01_06g0622	1.62	8.92	BSK5
	GrapeSMv01_18g0806	83.2867	184.01	AZF3
	GrapeSMv01_16g0176	17.1633	36.3933	RSH2
	GrapeSMv01_10g0496	0.286667	16.9333	--
	GrapeSMv01_08g0991	40.9433	12.8767	SCL9
	GrapeSMv01_18g1662	100.12	31.9067	TAR3
	GrapeSMv01_08g0246	5.62667	24.5733	At2g38640
	GrapeSMv01_08g0384	17.0067	50.16	--
	GrapeSMv01_16g1308	273.203	101.69	NAC014
	GrapeSMv01_15g1190	29.9433	2.29	PIK-1
	GrapeSMv01_02g0693	41.3933	99.13	ATG8F
	GrapeSMv01_04g0186	18.0433	38.4733	--
	GrapeSMv01_19g0627	3.57667	16.41	WRKY6
	GrapeSMv01_19g0997	6.21667	22.8033	PARC
	GrapeSMv01_06g0735	1.38333	8.33	BSK5
	GrapeSMv01_01g0523	11.08	23.3	udkC
	GrapeSMv01_04g1571	22.9167	4.70667	LECRK3
	GrapeSMv01_10g1017	9.53667	0.35	OSCBPY
	GrapeSMv01_Sca0045	2.9	20.3033	CAB40
	GrapeSMv01_Sca0052	81.8833	26.9233	RHM1
	GrapeSMv01_11g0045	18.7033	63.4233	ERF017
	GrapeSMv01_04g1008	4.37667	12.6233	--
	GrapeSMv01_11g0089	23.1767	46.68	--
	GrapeSMv01_11g0221	3.74	52.0533	BGAL1
	GrapeSMv01_02g0908	41.5967	8.38	At4g18030
	GrapeSMv01_06g0238	61.2433	18.6567	NADK1
	GrapeSMv01_13g0883	0.95	15.0067	--
	GrapeSMv01_05g0607	291.243	633.393	STP13
	GrapeSMv01_13g0298	120.653	22.3667	TIP1-3
	GrapeSMv01_06g0887	151.62	312.913	UGT87A2
	GrapeSMv01_04g1238	9.60333	22.6233	MPK7
	GrapeSMv01_02g1231	126.383	38.9733	AMAT
	GrapeSMv01_01g0176	19.8233	39.89	POT10
	GrapeSMv01_07g2016	31.5967	6.87667	GAUT8
	GrapeSMv01_06g0439	16.16	36.2367	RIBA3
	GrapeSMv01_10g0717	71.4367	18.8633	PTI5
	GrapeSMv01_01g0659	21.86	167.617	COR2
	GrapeSMv01_08g1440	56.7333	12.9367	ACR10
	GrapeSMv01_19g0547	10.3433	28.2333	ETFA
	GrapeSMv01_14g1110	95.0933	31.55	GALT1
	GrapeSMv01_03g0212	7.60667	20.16	AK1
	GrapeSMv01_15g1160	12.0067	1.66333	At1g50180
	GrapeSMv01_07g0640	35.2267	72.0967	CCOAOMT
	GrapeSMv01_11g0502	1.13667	5.9	--
	GrapeSMv01_11g0532	7.83667	25.48	SPX2
	GrapeSMv01_04g1264	8.28	0.99	BGAL3
	GrapeSMv01_01g1743	0.61	9.82	Os04g0403701
	GrapeSMv01_09g0962	4.12667	11.5167	UNI
	GrapeSMv01_13g1677	27.1933	4.97667	CESA3
	GrapeSMv01_11g0254	41.53	8.13667	--
	GrapeSMv01_11g0896	4.12667	12.7433	ATG18B
	GrapeSMv01_Sca0176	26.3467	63.1167	HACL
	GrapeSMv01_05g0205	8.26	0.976667	BOR2
	MSTRG.1268	8.65667	30.8133	SERK1
	GrapeSMv01_18g2155	84.8233	171.38	OPR2
	GrapeSMv01_18g1152	8.44	21.78	MAN7
	GrapeSMv01_07g0535	8.51	30.7933	--
	GrapeSMv01_13g0151	154.03	40.61	WUN1
	GrapeSMv01_06g1369	14.5167	1.40333	UGT86A1
	GrapeSMv01_10g0102	11.1467	28.38	--
	GrapeSMv01_16g0910	20.12	57.0333	VINST1
	GrapeSMv01_13g0647	38.02	80.23	PIP2-1
	GrapeSMv01_06g0838	0.893333	20.13	ASN1
	GrapeSMv01_07g2171	11.0533	26.5933	CCR4
	GrapeSMv01_15g1063	434.003	117.057	LEA14-A
	GrapeSMv01_03g0646	30.28	61.6333	ATG2
	GrapeSMv01_07g0453	25.8167	5.80333	CGR2
	GrapeSMv01_11g0506	79.49	24.5467	EMB1187
	GrapeSMv01_05g0925	33.2533	3.5	PMP22
	GrapeSMv01_03g0532	0.39	11.0767	AOS3
	GrapeSMv01_14g0124	0.323333	4.20333	CLC-B
	GrapeSMv01_16g0830	30.9467	66.2433	--
	GrapeSMv01_04g0079	7.82667	25.9567	CBL10
	GrapeSMv01_18g0187	20.7833	44.9233	Os01g0794400
	GrapeSMv01_08g1098	10.9967	29.0967	At3g10130
	GrapeSMv01_10g0516	61.74	15.1567	STP1
	GrapeSMv01_18g1599	0.236667	77.7333	TT10
	GrapeSMv01_03g0778	27.8967	57.4433	DDB_G0277335
	GrapeSMv01_06g1537	9.38	20.66	TGA9
	GrapeSMv01_14g0872	95.4533	27.4933	SNL6
	GrapeSMv01_18g1200	8.29333	22.2033	PAP2
	GrapeSMv01_11g0555	103.667	25.4833	--
	GrapeSMv01_19g0856	1.60667	37.8133	AAP7
	GrapeSMv01_12g0802	14.58	0.883333	RLP30
	GrapeSMv01_11g1258	30.5433	2.22333	XTH23
	GrapeSMv01_13g1774	30.8533	62.54	LECRK3
	GrapeSMv01_13g0144	8.98	27.8967	RER6
	GrapeSMv01_04g0019	34.81	1.5	MIK1
	GrapeSMv01_17g0814	20.19	44.8033	CLPB1
	GrapeSMv01_01g1753	39.6	11.12	FES1
	GrapeSMv01_01g0849	37.3533	76.37	--
	GrapeSMv01_14g1128	8.49	41.0233	--
	GrapeSMv01_09g1264	30.8567	7.64	At3g50940
	GrapeSMv01_08g0756	7.25333	18.28	UGT86A1
	GrapeSMv01_06g1505	0.0433333	6.76	-
	GrapeSMv01_12g1095	16.35	3.80667	At1g56140
	GrapeSMv01_09g0275	3.96667	21.0267	--
	GrapeSMv01_06g0938	44.0833	7.6	GSVIVT00023967001
	GrapeSMv01_11g0231	18.46	4.80333	GDCSP
	GrapeSMv01_18g0332	149.867	49.81	FLS
	GrapeSMv01_05g1429	38.4767	10.4333	CRT3
	GrapeSMv01_14g0993	3.06333	13.4033	--
	GrapeSMv01_16g1040	5.72333	16.5033	HSP83A
	GrapeSMv01_05g1702	12.8167	27.1867	At4g12980
	GrapeSMv01_06g1050	6.63333	0.513333	NEK5
	GrapeSMv01_08g0647	3.97	10.4933	XPO7
	GrapeSMv01_01g0960	15.1967	36.9433	2MMP
	GrapeSMv01_08g1178	231.227	1069.74	NHL10
	GrapeSMv01_19g0748	68.4533	20.94	TPK1
	GrapeSMv01_05g0407	3.9	17.0667	HYH
	GrapeSMv01_15g0580	1.54333	16.5033	--
	GrapeSMv01_13g0778	11.5333	28.35	--
	GrapeSMv01_01g1117	14.64	50.15	--
	GrapeSMv01_10g1066	28.2567	7.15333	ARF6
	GrapeSMv01_03g1332	45.83	12.55	CPX
	GrapeSMv01_11g0613	4.97333	15.21	MGD2
	GrapeSMv01_14g0911	29.15	59.3467	POT8
	GrapeSMv01_07g1552	0.743333	5.98	ASY3
	GrapeSMv01_18g0291	4.53667	22.1867	CAO
	GrapeSMv01_15g0587	19.12	43.8767	CML25
	MSTRG.4580	2.23667	53.77	GOLS1
	GrapeSMv01_17g0004	161.853	62.6767	CNX1
	GrapeSMv01_06g1590	1.98333	8.35	At5g41620
	GrapeSMv01_10g0698	5.94333	17.1867	NAC073
	GrapeSMv01_07g0469	3.42667	17.7633	--
	GrapeSMv01_14g1277	14.9533	31.5633	INVA
	GrapeSMv01_Sca0153	29.6833	3.77333	DREB1D
	GrapeSMv01_13g1154	15.1167	43.07	--
	GrapeSMv01_04g0975	6.07333	14.4267	PP2B1
	GrapeSMv01_08g1202	9.26	19.4567	--
	GrapeSMv01_17g1198	36.71	8.93667	At5g08350
	GrapeSMv01_14g1713	3.70667	13.6567	--
	GrapeSMv01_09g0417	59.83	14.4267	--
	GrapeSMv01_11g1096	38.1367	0.55	--
	GrapeSMv01_17g0360	76.3733	21.4967	B120
	GrapeSMv01_18g1658	43.75	12.6067	IP5P3
	GrapeSMv01_11g0753	6.79667	15.36	STP7
	GrapeSMv01_08g0815	24.62	5.5	JKD
	GrapeSMv01_14g0982	25.9867	62.1367	GATL9
	GrapeSMv01_13g1402	44.0467	13.4067	RDN2
	GrapeSMv01_11g0890	23.5867	2.2	GGP3
	GrapeSMv01_02g0959	18.8	3.23333	NAC071
	GrapeSMv01_06g1370	42.12	13.3733	EVN
	MSTRG.13603	18.5533	47.8533	--
	GrapeSMv01_06g1037	5.07333	14.6467	PUB24
	GrapeSMv01_09g1318	14.91	31.7667	--
	GrapeSMv01_01g0046	67.7367	21.8433	UPS2
	GrapeSMv01_11g0719	3.79	12.1233	PRCP
	GrapeSMv01_07g0378	69.8767	13.1433	CAD
	GrapeSMv01_03g0221	15.9867	35.8	--
	GrapeSMv01_17g1051	21.14	45.2133	Os07g0688000
	GrapeSMv01_13g0154	11.56	27.9633	AVT6C
	GrapeSMv01_17g0531	1.03	9.58	UGT89B2
	GrapeSMv01_18g1354	34.9867	9.1	ACR3
	GrapeSMv01_14g0362	8.83333	21.2	ABA4
	GrapeSMv01_05g0723	27.7867	9.40333	--
	GrapeSMv01_06g0101	11.7	50.7933	DIR7
	GrapeSMv01_02g0412	56.2167	14.0467	UBC5
	GrapeSMv01_01g0285	93.24	18.2467	--
	GrapeSMv01_15g0825	2.38	15.1	--
	GrapeSMv01_07g0293	105.5	30.36	--
	GrapeSMv01_16g0223	0.323333	10.25	GDH
	GrapeSMv01_07g1060	0.62	64.16	CLH1
	GrapeSMv01_18g0660	79.5533	23.7767	IAA9
	GrapeSMv01_17g0596	78.75	21.32	At1g18980
	GrapeSMv01_09g0773	62.6	17.4433	--
	GrapeSMv01_02g1114	4.14	10.42	At1g32090
	GrapeSMv01_11g1283	0.593333	6.94	F3GT2
	GrapeSMv01_02g1100	21.94	47.6633	--
	GrapeSMv01_15g0858	47.6767	18.4667	PUB44
	GrapeSMv01_08g1265	1.12667	6.83667	LIF2
	GrapeSMv01_11g1303	9.01	0.906667	Os07g0190000
	GrapeSMv01_13g0463	14.24	32.16	At5g11130/At5g11120
	GrapeSMv01_07g0551	36.1433	9.49667	GH3.1
	GrapeSMv01_05g0947	20.8567	5.62	--
	GrapeSMv01_06g1478	21.95	2.15	DREB1B
	GrapeSMv01_18g1310	4.89333	18.55	--
	GrapeSMv01_06g0611	16.5933	39.16	PHOS32
	GrapeSMv01_10g0254	11.6033	0.993333	ASAT1
	GrapeSMv01_10g0296	24.92	84.27	--
	GrapeSMv01_03g1080	22.8867	3.72667	-
	GrapeSMv01_19g0664	14.09	2.49667	MAP65-1
	GrapeSMv01_05g1744	148.737	39.06	UGT75L6
	GrapeSMv01_19g0597	142.87	59.8267	CPK19
	GrapeSMv01_04g1489	9.15	30.2367	MO2
	GrapeSMv01_14g0810	5.24667	12.3733	D6PKL1
	GrapeSMv01_10g1232	0.62	44.6867	At1g30700
	GrapeSMv01_13g0348	27.81	7.19667	rlmN
	GrapeSMv01_12g0867	125.917	25.7867	PIK-1
	GrapeSMv01_17g1057	13.5967	42.2133	CYP736A117
	GrapeSMv01_06g0686	1.73333	152.703	At2g29260
	GrapeSMv01_10g0499	6.40667	20.4533	PCR8
	GrapeSMv01_16g1359	29.38	4.85667	At2g46620
	GrapeSMv01_18g0312	10.2833	1.15333	At1g21890
	MSTRG.16479	11.4967	1.91333	SAG101
	GrapeSMv01_18g0880	7.90667	22.1833	WRKY7
	GrapeSMv01_07g0509	16.7967	2.92333	BT4
	GrapeSMv01_08g0837	22.4933	5.77667	--
	GrapeSMv01_01g1586	18.43	0.576667	LTPG1
	GrapeSMv01_17g1253	35.1167	8.73333	--
	GrapeSMv01_09g1013	218.88	85.8	Os04g0609600
	GrapeSMv01_03g0046	49.65	18.3767	KIN7E
	GrapeSMv01_18g0821	42.6233	5.44667	CYTB5-D
	GrapeSMv01_06g0095	64.3933	10.0533	DIR19
	GrapeSMv01_01g0224	2.94	14.83	--
	GrapeSMv01_09g0320	1.25	7.68333	--
	GrapeSMv01_04g1539	42.7267	7.06333	PME51
	GrapeSMv01_13g0885	35.78	7.87667	--
	GrapeSMv01_02g1211	0.956667	32.3133	NIT4B
	GrapeSMv01_09g0589	11.4733	1.99333	At5g63020
	GrapeSMv01_10g0687	43.7067	9.14667	E6
	GrapeSMv01_13g1741	44.8333	11.36	PSRP2
	GrapeSMv01_10g0942	4.39333	0.343333	FLS2
	GrapeSMv01_08g0869	119.397	48.09	ITN1
	GrapeSMv01_14g0493	34.5067	9.96667	RUG3
	GrapeSMv01_13g0624	72.5233	17.9133	MLO6
	GrapeSMv01_01g1613	1.39	8.17	SPL13A
	GrapeSMv01_13g0726	29.52	7.16333	ACR10
	GrapeSMv01_08g0492	4.58667	10.6267	XPO7
	GrapeSMv01_16g1349	14.95	2.46667	SBT3.3
	GrapeSMv01_16g0842	28.2767	3.65	DREB1D
	GrapeSMv01_02g0280	12.4467	2.27667	At1g64390
	GrapeSMv01_19g0778	39.5633	9.00333	NMNAT
	GrapeSMv01_05g0601	2.28333	14.14	MAKR1
	GrapeSMv01_01g0327	23.3333	1	AOC
	GrapeSMv01_04g1721	20.4733	2.50667	DAO
	GrapeSMv01_04g1719	12.88	2.28333	LECRKS5
	GrapeSMv01_16g1381	148.103	54.4033	BIP4
	GrapeSMv01_10g0388	40.01	10.4633	GAUT4
	GrapeSMv01_16g1232	8.7	1.02333	LRK10
	GrapeSMv01_03g0349	49.5167	10.37	EXL5
	GrapeSMv01_02g0247	7.77667	0.733333	SUN5
	GrapeSMv01_Sca0149	12.8533	28.1833	Pgap3
	GrapeSMv01_05g0490	21.1167	3.30667	TULP3
	GrapeSMv01_07g0275	5.88333	19.1267	ABCG11
	GrapeSMv01_03g0266	37.3233	7.17333	LYM2
	GrapeSMv01_04g1114	24.77	5.17	HOS3
	MSTRG.21484	0.176667	5.43	LAC14
	GrapeSMv01_10g0837	4.45333	12.2367	RKF1
	GrapeSMv01_18g0804	64.0367	18.8867	APT1
	GrapeSMv01_11g0027	36.7867	182.15	SS
	GrapeSMv01_02g0067	6.90333	0.883333	GL3
	GrapeSMv01_10g1094	40.1033	97.2	BAG2
	GrapeSMv01_06g1344	73.7967	738.827	VIT_06s0061g00120
	GrapeSMv01_04g0246	1.00667	5.94	CRYD
	GrapeSMv01_12g0834	6.99667	18.9767	ABC1K7
	GrapeSMv01_12g0426	40	11.0067	--
	GrapeSMv01_08g1635	1.82	6.8	PCMP-H85
	GrapeSMv01_18g2442	112.837	44.82	ARF1
	GrapeSMv01_12g0101	33.3533	8.82	MBR1
	GrapeSMv01_01g1310	2.05333	7.61	CPN60B4
	GrapeSMv01_04g0021	34.4567	1.57333	MIK1
	GrapeSMv01_19g0905	8.62333	18.9533	--
	GrapeSMv01_08g1070	5.50333	16.7233	--
	GrapeSMv01_04g0032	59.5533	14.3433	RLK5
	GrapeSMv01_09g0409	6.21333	13.5233	KIN13B
	GrapeSMv01_08g1409	9.52667	21.7667	UGT73C3
	GrapeSMv01_08g0904	39.4167	13.47	At1g67720
	GrapeSMv01_07g1241	33.9967	0.93	--
	GrapeSMv01_08g0379	53.4433	13.38	AMT3-3
	GrapeSMv01_06g0689	4.52667	57.5567	At2g29260
	GrapeSMv01_11g0830	22.79	1.65667	ENODL1
	GrapeSMv01_16g0907	10.5067	32.51	VINST1
	GrapeSMv01_14g0929	32.3933	3.46333	AXY4L
	GrapeSMv01_15g0900	76.8467	29.87	MTB1
	MSTRG.17027	77.2767	161.113	--
	GrapeSMv01_04g1024	22.8333	3.28667	DSP3
	GrapeSMv01_13g0664	14.6167	30.1267	PAL
	GrapeSMv01_04g1301	6.00667	27.32	BBX19
	GrapeSMv01_11g0950	30.2833	9.56	SMAX1
	GrapeSMv01_09g1137	34.53	11.9767	At1g79710
	GrapeSMv01_16g0197	3.84333	10.3767	At2g16790
	GrapeSMv01_13g0123	5.25333	15.4067	mipp1
	GrapeSMv01_12g1052	62.01	15.53	poxN1
	GrapeSMv01_04g0355	134.37	50.2733	CCDC25
	GrapeSMv01_02g0480	8.40333	0.906667	SKU5
	GrapeSMv01_15g0897	10.0167	25.61	ARF11
	GrapeSMv01_14g1976	3.61333	13.4233	PHL1
	GrapeSMv01_04g0326	16.1233	2.72333	NPR4
	GrapeSMv01_11g0275	13.5767	0.846667	MYB36
	GrapeSMv01_11g0972	39.83	12.7133	PBL17
	GrapeSMv01_12g0681	14.2267	0.96	XTH9
	GrapeSMv01_18g0682	21.3	3.80333	--
	GrapeSMv01_06g1006	32.8667	8.85	At1g09575
	GrapeSMv01_08g0734	6.12667	0.623333	PIN1C
	GrapeSMv01_18g1856	23.4467	7.12667	RUN1
	GrapeSMv01_10g1095	26.47	72.5667	BAG1
	GrapeSMv01_13g0610	302.663	135.93	EF1
	GrapeSMv01_06g0115	11.5733	2.02667	pod
	GrapeSMv01_06g0025	206.543	77.6833	CPN60B2
	GrapeSMv01_08g1449	17.9367	38.8133	Os04g0560200
	GrapeSMv01_02g0485	0.206667	7.59333	bVPE
	GrapeSMv01_09g0133	13.7233	2.73	PDAT1
	GrapeSMv01_18g1174	28.37	7.74333	BZIP44
	GrapeSMv01_04g1090	13.64	3.97667	At3g03300
	MSTRG.4305	25.9167	4.81667	ADH1
	GrapeSMv01_07g0435	13.91	2	TUBA
	GrapeSMv01_13g0884	0.84	12.43	--
	GrapeSMv01_09g0074	33.5867	10.8333	ITIH3
	GrapeSMv01_10g0584	17.16	4.8	CIP7
	GrapeSMv01_18g0482	14.0833	2.63333	STP5
	GrapeSMv01_17g0922	93.0667	29.21	BHLH167
	GrapeSMv01_05g1568	39.45	12.29	ACD6
	GrapeSMv01_06g0606	0.313333	4.08333	epsF
	GrapeSMv01_13g1590	6.13	22.6833	--
	GrapeSMv01_06g0556	45.9767	16.2233	TOC75-3
	GrapeSMv01_02g0448	34.34	75.0667	ATG8F
	GrapeSMv01_06g1470	21.12	6.02	NAT12
	GrapeSMv01_02g0786	3.28	11.38	At4g16820
	GrapeSMv01_06g0307	11.13	2.41	MGP
	GrapeSMv01_01g0055	25.74	7.17333	--
	GrapeSMv01_09g0178	9.6	2.35	APM1
	GrapeSMv01_01g0800	35.6867	8.86333	CRK2
	GrapeSMv01_06g0843	68.48	21.4667	RANBP1C
	GrapeSMv01_08g1086	112.383	46.3733	IPCS1
	GrapeSMv01_05g0259	4.65333	16.22	HYH
	MSTRG.6134	44.0133	11.5033	--
	GrapeSMv01_06g0337	6.28667	14.0833	--
	GrapeSMv01_03g0593	22.2133	169.517	MES10
	GrapeSMv01_18g1189	26.46	6.99333	JAL3
	GrapeSMv01_07g0905	27.2733	2.74333	IGS1
	GrapeSMv01_11g0697	1.51333	4.88	CRK35
	GrapeSMv01_06g0909	153.873	66.12	EXO70B1
	GrapeSMv01_09g1004	74.97	23.6067	--
	MSTRG.1081	7.13333	1.03333	--
	GrapeSMv01_12g0554	57.9733	20.7767	PDIL2-3
	GrapeSMv01_02g0211	30.5133	8.36	ABIL3
	GrapeSMv01_12g0960	6.33	13.9533	PAA1
	GrapeSMv01_14g1085	0.953333	8.98667	FTSH6
	GrapeSMv01_16g0885	18.9233	51.4433	VIT_16s0100g01030
	GrapeSMv01_03g0319	49.6667	12.4	Bp10
	GrapeSMv01_05g0825	9.01333	26.1333	--
	GrapeSMv01_12g0385	83.6933	30.4133	--
	GrapeSMv01_14g0050	0.133333	1.92	CLC-B
	GrapeSMv01_07g0429	13.5733	2.13	BHLH25
	GrapeSMv01_07g0004	30.1167	10.0333	At5g48380
	GrapeSMv01_17g0366	35.88	9.63667	MYB62
	GrapeSMv01_15g0462	5.76667	14.1567	--
	GrapeSMv01_07g1250	41.2067	6.67667	GRXC13
	GrapeSMv01_10g0654	33.2967	4.41333	BHLH162
	GrapeSMv01_04g0764	5.23667	224.93	ASP
	GrapeSMv01_05g0511	0.443333	5.19333	At5g18840
	GrapeSMv01_03g0768	81.7967	29.6467	RHY1A
	MSTRG.10317	7.81333	0.376667	At3g21340
	GrapeSMv01_15g1143	88.2033	33.5833	FTIP3
	GrapeSMv01_04g0247	10.3267	27.2533	--
	GrapeSMv01_17g0703	25.45	7.10333	--
	GrapeSMv01_10g1484	20.4333	5.57	TCP7
	GrapeSMv01_14g1212	4.84667	11.69	PCMP-H83
	GrapeSMv01_18g1672	53.14	16.7067	TAR3
	GrapeSMv01_18g0363	91.42	39.0567	MEKK1
	GrapeSMv01_06g0840	1.37333	8.49333	MAPKKK17
	GrapeSMv01_04g0302	43.44	14.4733	ATHB-15
	GrapeSMv01_04g1330	11.0333	22.2267	BHLH121
	GrapeSMv01_12g0790	44.63	15.4533	HSP90-6
	GrapeSMv01_07g0289	262.183	119.63	ATHB-6
	GrapeSMv01_09g0010	34.12	11.6467	SRF6
	GrapeSMv01_10g1445	43.9867	12.3333	tmem53-a
	GrapeSMv01_12g0822	16.8333	1.64	FLA2
	GrapeSMv01_14g0112	12.69	26.2833	htpX2
	GrapeSMv01_01g0284	55.9467	17.64	--
	GrapeSMv01_19g0625	27.6433	5.07667	MAPKKK18
	GrapeSMv01_08g0513	737.997	316.71	CAM-1
	GrapeSMv01_13g0656	105.773	35.1367	GATA8
	GrapeSMv01_01g1115	7.40667	19.73	RNS1
	GrapeSMv01_09g0983	5.58	12.5067	CIPK25
	GrapeSMv01_10g0039	16.91	2.28	TSB
	GrapeSMv01_07g0485	0.22	4.5	HHP4
	GrapeSMv01_05g0913	34.9967	5.6	PMP22
	GrapeSMv01_07g0512	63.8867	17.7667	AZF1
	GrapeSMv01_06g1319	17.0333	37.17	At4g18380
	GrapeSMv01_17g0353	9.26	1.98667	BTS
	GrapeSMv01_07g1531	59.2267	20.61	--
	GrapeSMv01_11g0414	30.0233	8.36	LRX4
	GrapeSMv01_11g0913	18.4367	37.0333	--
	GrapeSMv01_17g0074	30.42	9.83667	NOV
	MSTRG.15627	4.49333	0.846667	RPPL1
	GrapeSMv01_07g0848	37.7267	13.5467	At5g39450
	GrapeSMv01_16g0057	27.7633	2.72	CDI
	GrapeSMv01_04g0492	0.763333	5.24667	HY5
	GrapeSMv01_08g1821	15.1667	1.75333	GNS1
	GrapeSMv01_06g1391	0.126667	18.7367	XTH32
	GrapeSMv01_14g0928	37.9967	6.51	AXY4L
	GrapeSMv01_02g0626	4.41333	13.0833	MYB3R4
	GrapeSMv01_01g1736	22.3633	6.73667	RBOHC
	GrapeSMv01_13g0364	20.1333	1.72	--
	GrapeSMv01_14g0819	10.4	21.8467	--
	GrapeSMv01_12g0095	30.5267	9.47667	DTX41
	GrapeSMv01_18g0400	1.09667	8.38333	ALD1
	GrapeSMv01_11g0119	16.98	3.52667	BRXL4
	GrapeSMv01_12g0745	1.36	6.49	NDB3
	GrapeSMv01_19g1340	30.9333	7.76	MTP10
	GrapeSMv01_11g0329	25.1333	3.08	DREB3
	GrapeSMv01_13g0681	6.62333	16.1233	OTU9
	GrapeSMv01_13g0653	25.3033	5.96333	--
	GrapeSMv01_15g1128	11.29	1.79333	PYRD
	GrapeSMv01_07g0527	9.28333	22.6067	ACBP3
	GrapeSMv01_10g0676	11.5867	2.66	RLP4
	GrapeSMv01_18g0008	35.66	3.76667	CESA5
	GrapeSMv01_12g1322	48.9133	16.5733	MORF1
	GrapeSMv01_18g1043	96.9433	28.3567	--
	GrapeSMv01_19g0653	2.65667	9.48667	--
	GrapeSMv01_14g0506	66.2533	23.46	COB
	GrapeSMv01_02g0791	67.1	20.0567	--
	GrapeSMv01_03g0669	10.53	21.9467	MCCB
	GrapeSMv01_14g0373	6.35667	0.2	CUT1
	GrapeSMv01_05g1025	10.5067	1.79	lipA
	GrapeSMv01_02g0326	2.89667	0.12	ABCC10
	GrapeSMv01_04g0263	16.2133	34.2567	ARA1
	GrapeSMv01_07g1329	4.46333	12.4067	BGLU11
	GrapeSMv01_14g1013	9.15667	1.05333	-
	GrapeSMv01_04g1659	2.57	8.03333	dclre1b
	GrapeSMv01_06g0974	18.3933	4.60667	NET4A
	GrapeSMv01_05g0615	38.9133	13.1933	LECRK4
	GrapeSMv01_08g1401	10.99	22.4967	NCS1
	GrapeSMv01_18g1579	0.67	5.60333	TT10
	GrapeSMv01_04g0722	76.0333	25.2733	At2g24580
	MSTRG.11788	28.04	63.0533	At1g07650
	GrapeSMv01_02g0618	100.427	573.83	TLP
	GrapeSMv01_07g1420	26.89	8.71667	ERDJ3B
	GrapeSMv01_04g0563	33.94	9.75	--
	GrapeSMv01_Sca0341	29.5	62.2433	At3g17800
	GrapeSMv01_18g2221	9.18	1.75	RPV1
	GrapeSMv01_04g1484	119.04	39.48	MO2
	GrapeSMv01_07g0518	9.05667	20.3033	LBD39
	GrapeSMv01_16g0903	15.2667	43.04	STS
	GrapeSMv01_15g0880	39.29	14.4733	CBP60E
	GrapeSMv01_15g0207	5.87333	0.503333	MSL10
	GrapeSMv01_11g1241	4.51333	16.8067	--
	GrapeSMv01_14g1334	23.9533	6.8	ppx
	GrapeSMv01_10g0708	6.58	19.2433	ROMT
	GrapeSMv01_07g2034	6.79333	16.7433	OXI1
	GrapeSMv01_14g0500	10.4233	0.626667	BA13
	GrapeSMv01_16g1262	4.44667	16.2067	GLT1
	GrapeSMv01_12g0538	1356.75	223.89	ACO3
	GrapeSMv01_11g0639	114.977	35.0167	--
	GrapeSMv01_15g0772	37.9267	10.3533	At1g02270
	GrapeSMv01_08g1270	171.467	71.1733	--
	GrapeSMv01_16g1166	436.363	200.127	UBC28
	GrapeSMv01_18g1298	402.163	192.793	PSI2
	GrapeSMv01_05g1723	7.21	15.34	UGT75C1
	GrapeSMv01_07g2052	11.72	1.3	MEBL
	GrapeSMv01_16g1405	16.9867	5.65	JMJ25
	GrapeSMv01_14g0178	62.3167	22.0767	ALY4
	GrapeSMv01_06g0111	5.76667	14.4467	SINAT2
	GrapeSMv01_04g1126	15.9533	2.92	GT5
	GrapeSMv01_05g0541	70.32	27.4133	GLN2
	GrapeSMv01_14g1424	25.4567	7.76667	At3g11710
	GrapeSMv01_09g1239	6.1	12.95	At1g51550
	GrapeSMv01_05g1291	26.86	5.75	DAPB1
	GrapeSMv01_04g1124	10.85	1.83667	OST48
	GrapeSMv01_16g1108	13.2467	3.13333	spast
	GrapeSMv01_18g1296	4.48333	0.756667	CERBERUS
	GrapeSMv01_15g0773	80.6367	31.6867	NAC014
	GrapeSMv01_18g0520	46.71	16.0767	At1g78280
	GrapeSMv01_01g1068	166.433	76.3033	PBL3
	GrapeSMv01_18g0029	3.28333	12.29	CAD
	GrapeSMv01_04g0481	18.2533	3.77333	--
	GrapeSMv01_17g0444	8.62	17.4667	CCR4-3
	GrapeSMv01_18g1890	0.676667	5.73	LAC14
	GrapeSMv01_18g1415	21.7	5.68333	SPAC57A10.07
	GrapeSMv01_18g0296	7.14	19.9467	At3g26430
	GrapeSMv01_05g0632	28.3733	7.67667	surE
	GrapeSMv01_01g0896	22.5	5.16333	XTH33
	GrapeSMv01_03g0761	9.67	1.58333	--
	GrapeSMv01_01g0096	264.027	109.613	VSR6
	GrapeSMv01_16g0665	92.4867	22.61	PMEI11
	GrapeSMv01_01g0851	117.14	47.3033	BCA2
	GrapeSMv01_18g0125	3.11333	12.57	LOG5
	GrapeSMv01_08g0933	21.0933	58.0467	MtrDRAFT_AC149210g1v1
	GrapeSMv01_09g0798	15.4967	4.6	XA21
	GrapeSMv01_13g0508	2.43	22.48	HSP18.2
	GrapeSMv01_06g1106	22.58	6.80333	EIN3
	GrapeSMv01_18g2122	12.1833	4.11667	RPV1
	GrapeSMv01_08g0740	2.39667	24.8667	At2g26850
	GrapeSMv01_16g0069	88.4433	25.43	PAL
	GrapeSMv01_02g1301	8.59	0.663333	TAT
	GrapeSMv01_18g2154	1.73333	10.0633	OPR11
	GrapeSMv01_04g1629	41.49	8.04	PME51
	GrapeSMv01_18g1002	217.61	99.4867	At4g33300
	GrapeSMv01_15g1071	43.3233	13.6633	WRKY22
	GrapeSMv01_17g0237	21.2633	51.8567	CAR4
	GrapeSMv01_07g0846	34.7867	8.97	BAT1
	GrapeSMv01_12g1140	7.44	18.7133	GT6
	GrapeSMv01_15g1183	7.88667	17.3867	--
	GrapeSMv01_02g0929	34.61	8.73	PUP11
	GrapeSMv01_12g0185	36.9167	6.30333	At2g42690
	GrapeSMv01_10g1208	45.91	16.1533	--
	GrapeSMv01_03g0678	18.5667	4.40667	PUB26
	GrapeSMv01_18g0136	13.4	1.39667	AATL1
	GrapeSMv01_11g0212	43.8267	10.3533	A70
	GrapeSMv01_16g1298	171.537	69.5667	--
	GrapeSMv01_10g0745	0.903333	7.26667	At5g45920
	GrapeSMv01_06g0135	97.5333	36.2167	LECRK3
	GrapeSMv01_03g0291	157.193	22.3667	EXLA2
	GrapeSMv01_12g1253	5.61667	165.447	--
	GrapeSMv01_08g0965	73.64	29.3967	XBAT31
	GrapeSMv01_18g2397	31.2167	9.96333	SUN4
	GrapeSMv01_02g0325	62.4467	20.9233	VATE
	GrapeSMv01_12g0252	73.6467	27.3233	CGL160
	GrapeSMv01_18g1930	6.03667	15.1267	copb2
	GrapeSMv01_05g0481	4.81333	12.0633	DRB2
	GrapeSMv01_04g1538	11.8633	0.753333	PME51
	GrapeSMv01_01g0248	306.147	139.347	GS1-2
	GrapeSMv01_04g0117	9.3	19.6633	RTE1
	GrapeSMv01_19g0031	21.6333	0.563333	VIT_19s0014g04930
	GrapeSMv01_19g0022	18.4833	5.28	FH5
	GrapeSMv01_02g1340	20.8967	44.7233	--
	GrapeSMv01_05g1378	15.2867	3.52	polA
	GrapeSMv01_06g1541	3.95667	11.5667	BIC1
	GrapeSMv01_03g1207	6.82333	0.966667	RPP8L2
	GrapeSMv01_18g0616	27.8	3.34667	CER2
	GrapeSMv01_19g0466	10.22	0.72	TBL38
	GrapeSMv01_14g0863	0.16	5.44	At1g48100
	GrapeSMv01_09g1161	104.94	38.7867	MKK5
	GrapeSMv01_15g1097	96.57	42.51	PUB33
	GrapeSMv01_09g1174	23.2967	5.17667	GLUTRBP
	GrapeSMv01_18g1161	13.8533	1.36333	JMT
	GrapeSMv01_11g0717	52.0033	20.6733	CBP60E
	GrapeSMv01_10g0579	17.6367	0.38	GES
	GrapeSMv01_01g0450	19.6967	4.09	LRK10
	MSTRG.1894	25.3033	7.71333	YDA
	GrapeSMv01_07g0227	12.08	1.43667	--
	GrapeSMv01_01g0420	12.0667	30.6067	--
	GrapeSMv01_13g0509	6.92667	26.9133	HSP18.2
	GrapeSMv01_07g0042	4.86	0.17	--
	GrapeSMv01_03g0620	71.45	23.2667	--
	GrapeSMv01_15g0744	40.2967	2.23667	CYP87A3
	GrapeSMv01_06g0381	181.173	71.1967	MPK3
	GrapeSMv01_07g1688	47.2667	15.8667	MORF6
	GrapeSMv01_10g0485	39.9433	15.24	B120
	GrapeSMv01_05g0884	104.82	41.0467	At4g14360
	GrapeSMv01_12g0359	245.007	100.693	At4g28400
	GrapeSMv01_07g1938	2.83667	0.193333	CES101
	GrapeSMv01_11g0181	41.4667	16.2633	PUB34
	GrapeSMv01_06g1614	351.127	165.383	DNAJ1
	GrapeSMv01_10g0240	0.616667	7.16	--
	GrapeSMv01_04g0205	8.82333	1.09	FDH
	GrapeSMv01_15g0861	10.6867	2.31667	LCA1
	MSTRG.21738	32.42	12.81	RPV1
	GrapeSMv01_19g0037	5.55333	0.11	VIT_19s0014g04930
	GrapeSMv01_02g0459	1.93333	6.87	NPF6.3
	GrapeSMv01_12g0380	18.5167	2.85	BHLH162
	GrapeSMv01_03g0977	0.256667	33.3167	PR1B1
	GrapeSMv01_12g0828	5.02667	14.5267	NUDT2
	GrapeSMv01_14g1390	14.6367	1.66333	--
	GrapeSMv01_08g1141	77.07	27.62	LAX2
	GrapeSMv01_18g2367	31.89	9.27333	At1g07160
	GrapeSMv01_05g1507	32.6233	13.06	At1g05910
	GrapeSMv01_10g0060	11.9433	3.23333	JMJ25
	GrapeSMv01_13g0661	3.90333	8.56333	WAV3
	GrapeSMv01_01g1730	17.7767	2.87	SRC2
	GrapeSMv01_11g0080	32.9133	1.37333	CYP92C6
	GrapeSMv01_16g1326	19.7233	6.01667	SBT3.3
	GrapeSMv01_17g0297	180.077	69.8933	HSP26-A
	GrapeSMv01_13g0923	15.5333	3.55333	--
	GrapeSMv01_08g1765	35.8967	12.2633	MTPC2
	GrapeSMv01_06g0449	22.7733	6.81333	UFC
	GrapeSMv01_19g0156	58.5067	18.18	CAB13
	GrapeSMv01_08g0260	27.7967	6.31667	FLA17
	GrapeSMv01_10g1317	4.08333	9.78333	WAV3
	MSTRG.18634	25.66	8.35667	LRK10
	GrapeSMv01_12g0212	0.32	15.1633	At1g30760
	GrapeSMv01_17g0262	590.19	257.693	CML27
	GrapeSMv01_01g0235	41.1733	11.75	At5g23160
	GrapeSMv01_07g0735	7.24	15.3733	TGA1
	GrapeSMv01_16g0026	9.03	1.03333	HSR201
	GrapeSMv01_19g0142	398.11	186.317	petC
	GrapeSMv01_11g1247	1.76	7.80667	--
	GrapeSMv01_16g1252	21.92	5.19333	LRK10
	GrapeSMv01_04g0908	34.1533	12.2633	--
	GrapeSMv01_03g0381	7.44667	24.3033	--
	GrapeSMv01_13g0160	3.39	13.04	--
	GrapeSMv01_12g0864	6.16	12.95	At3g27390
	GrapeSMv01_05g0226	33.7967	13.7767	SPL1
	GrapeSMv01_13g0346	4.99667	0.333333	--
	GrapeSMv01_01g0492	4.2	12.0933	GLCAT14A
	GrapeSMv01_05g0521	0.25	13.9433	DMP2
	GrapeSMv01_15g0809	0.606667	30.29	--
	GrapeSMv01_07g0881	2.29	6.77667	--
	GrapeSMv01_16g0079	31.2367	11.3367	PSL5
	GrapeSMv01_13g1458	7.18333	19.17	NRPD5B
	GrapeSMv01_08g0391	5.46	0.163333	LECRKS4
	GrapeSMv01_15g0633	35.1867	13.5067	GAUT1
	GrapeSMv01_02g1266	438.523	159.567	AOX3
	GrapeSMv01_06g1547	72.5967	24.5133	CML48
	GrapeSMv01_13g1546	77.91	30.3967	ERD15
	GrapeSMv01_07g0639	5.85	17.18	At5g67140
	GrapeSMv01_16g1047	68.26	15.56	HIPP39
	GrapeSMv01_19g0658	1.67333	13.76	MPC4
	GrapeSMv01_01g0961	6.97	22.2433	--
	GrapeSMv01_09g0167	8.97333	2.58	APM1
	GrapeSMv01_01g0289	7.27333	15.1633	ZCCHC8
	GrapeSMv01_10g0741	29.85	8.79333	NUDT15
	GrapeSMv01_03g0875	7.31333	0.893333	SCPL18
	GrapeSMv01_14g0914	4.87667	15.0967	--
	GrapeSMv01_16g0911	50.4	214.13	STS
	GrapeSMv01_15g0300	19.8733	2.77	--
	GrapeSMv01_12g0565	24.24	6.06	TRZ2
	GrapeSMv01_18g0052	70.0633	25.5467	PHT1-9
	GrapeSMv01_11g0194	100.843	40.66	CKL2
	GrapeSMv01_19g0062	0.4	11.8833	GH3.6
	GrapeSMv01_14g1029	2.05	7.36	--
	GrapeSMv01_01g0505	3.03667	7.52667	--
	GrapeSMv01_16g0904	7.38	21.3933	STS
	GrapeSMv01_18g0048	23.1933	6.85333	sdr42e1
	GrapeSMv01_18g1452	33.7933	79.86	--
	GrapeSMv01_10g0589	8.07667	1.06667	PPO
	GrapeSMv01_13g0412	6.40333	16.0433	RCA
	GrapeSMv01_06g1486	0.0866667	26.78	-
	GrapeSMv01_13g0141	26.96	7.2	--
	GrapeSMv01_19g0078	15.44	4.12333	At4g27290
	GrapeSMv01_06g1137	1.50667	9.61667	At1g71250
	GrapeSMv01_18g1420	5.05667	12.59	DOF3.5
	GrapeSMv01_09g1059	2.92	9.63	ABCC13
	GrapeSMv01_01g0749	34.4467	12.3433	--
	GrapeSMv01_13g0127	23.4067	8.26333	ENGASE1
	GrapeSMv01_09g0386	37.19	12.8967	--
	GrapeSMv01_07g0893	15.07	3.18	AMT3-1
	GrapeSMv01_08g0945	157.457	71.54	AGD7
	GrapeSMv01_04g0874	27.92	7.23	--
	GrapeSMv01_04g0860	44.8133	16.8067	PAO4
	GrapeSMv01_08g0409	6.51	16.47	mcfF
	GrapeSMv01_04g0366	13.4033	2.00667	RD22
	GrapeSMv01_14g0522	14.1467	2.45	FER
	GrapeSMv01_05g1244	30.6667	10.6667	EIX2
	GrapeSMv01_06g1160	12.0233	2.02	TUBB4
	GrapeSMv01_07g1211	22.91	57.5267	HIS2A
	GrapeSMv01_09g0421	4.17667	11.07	--
	GrapeSMv01_16g1119	10.5433	1.58	EIX1
	GrapeSMv01_11g0199	3.31	11.7333	HSF30
	GrapeSMv01_11g0074	24.67	6.72333	SBT1.8
	GrapeSMv01_01g0436	19.7267	4.93	ELP2
	GrapeSMv01_05g0013	14.1133	1.54333	SWEET17
	GrapeSMv01_15g1045	398.973	193.42	At5g24010
	GrapeSMv01_07g1924	17.0733	4.72667	CES101
	GrapeSMv01_01g0622	25.3733	6.36333	BPA1
	GrapeSMv01_14g0879	90.6133	42.98	BCA1
	GrapeSMv01_18g0313	0.593333	20.0933	At4g08290
	GrapeSMv01_06g0429	59.4967	187.997	EXO70H1
	GrapeSMv01_13g0140	0.113333	6.20667	--
	GrapeSMv01_04g1127	80.8333	33.8133	BEH2
	GrapeSMv01_13g1830	0.956667	29.9867	--
	GrapeSMv01_12g1489	4.51	0.63	RPS2
	GrapeSMv01_04g0543	474.327	219.47	WRKY40
	GrapeSMv01_17g1220	41.2633	13.1233	At5g08350
	GrapeSMv01_19g0480	152.05	66.64	RHM1
	GrapeSMv01_07g1849	4.34333	13.73	SDI1
	GrapeSMv01_08g1177	36.86	12.0933	NHL1
	GrapeSMv01_07g0221	141.283	37.8733	PLAT2
	GrapeSMv01_03g1176	98.47	34.9667	RIBA1
	GrapeSMv01_01g1095	23.8167	6.99333	At1g26850
	GrapeSMv01_05g0728	41.5833	14.45	NFP
	GrapeSMv01_02g0298	16.7633	1.52667	AS
	GrapeSMv01_05g0036	183.193	81.6533	ephA
	GrapeSMv01_07g0024	9.59333	1.49333	--
	GrapeSMv01_01g0047	85.2267	36.31	erlin2-b
	GrapeSMv01_06g0551	18.72	4.34667	BOA
	GrapeSMv01_06g0682	6.58667	22.0633	At2g29260
	GrapeSMv01_08g1091	339.9	148.58	--
	GrapeSMv01_07g0499	9.25	1.80333	SHR
	GrapeSMv01_04g1646	23.01	7.9	FTSHI4
	GrapeSMv01_18g2001	10.7733	0.876667	WAK2
	GrapeSMv01_06g0721	13.1633	30.7967	GSTU8
	GrapeSMv01_12g1476	7.93	2.33333	GXM1
	GrapeSMv01_17g0343	57.0367	23.3267	LRK10L-1.2
	GrapeSMv01_03g0269	3.31	8.53	OFUT16
	GrapeSMv01_06g0522	8.51	2.06667	IDN2
	GrapeSMv01_13g1632	7.02	0.756667	PAO1
	GrapeSMv01_15g0715	83.35	34.05	CYP704C1
	GrapeSMv01_13g0504	13.3733	37.2733	HSP18.2
	GrapeSMv01_06g0235	10.1133	1.90333	At1g51440
	GrapeSMv01_10g0575	78.39	35.2567	CHR28
	GrapeSMv01_14g1233	5.49	12.53	At1g11820
	GrapeSMv01_18g1122	95.94	23.3233	At2g16250
	GrapeSMv01_08g1578	43.5867	14.58	SAP11
	MSTRG.21840	14.4133	4.02667	--
	GrapeSMv01_10g0645	0.113333	5.26333	--
	GrapeSMv01_03g0402	1.29	8.28333	--
	GrapeSMv01_15g1052	64.29	28.1733	MMK2
	GrapeSMv01_05g1372	25.3833	5.57	BHLH153
	GrapeSMv01_18g0433	442.503	206.133	SPBC2A9.03
	GrapeSMv01_16g1199	54.2233	19.3967	LRK10
	GrapeSMv01_16g1113	3.18667	15.26	At5g24080
	GrapeSMv01_07g0405	27.9067	8.75333	At4g37920
	GrapeSMv01_10g1236	7.44	1.39	EMB2279
	GrapeSMv01_12g0093	23.6567	5.22333	DTX41
	GrapeSMv01_03g0595	15.95	64.65	MES10
	GrapeSMv01_Sca0236	331.507	158.413	CML35
	GrapeSMv01_15g0009	91.8733	40.6733	Os03g0815200
	GrapeSMv01_19g0196	2.55333	8.78	ERF053
	GrapeSMv01_18g2430	23.1233	3.95667	CYP714C2
	GrapeSMv01_Sca0033	37.25	15.8933	UBP23
	GrapeSMv01_08g0636	14.46	3.83333	--
	GrapeSMv01_12g0855	18.9967	5.77333	--
	GrapeSMv01_05g0658	32.79	11.4333	FLZ8
	GrapeSMv01_14g0811	6.95	14.01	--
	GrapeSMv01_06g1056	77.1267	32.8467	SSL3
	GrapeSMv01_03g1306	76.23	31.5633	GT3
	GrapeSMv01_06g0687	1.92	11.3767	At2g29260
	GrapeSMv01_09g0478	9.49667	0.66	AUX22
	GrapeSMv01_08g1107	62.7667	23.8433	At3g11320
	GrapeSMv01_06g0498	196.7	90.24	PUB33
	GrapeSMv01_07g2070	19.49	4.39	CCME
	GrapeSMv01_05g1281	3.86	7.91	SKIP20
	GrapeSMv01_07g1223	3.53	9.00667	ROPGAP2
	GrapeSMv01_06g1337	4.37667	0.713333	At3g20040
	GrapeSMv01_13g0229	37.4233	14.75	PRR73
	GrapeSMv01_03g0129	106.52	43.3333	At2g21160
	GrapeSMv01_05g0914	13.8167	2.83	--
	GrapeSMv01_16g1154	24.8833	7.85333	SEN1
	GrapeSMv01_07g0019	6.76333	16.8633	--
	GrapeSMv01_11g0318	11.4033	2.92333	RDR5
	GrapeSMv01_12g0859	10.3267	2.15333	COL9
	GrapeSMv01_11g0234	62.1567	20.8567	Os05g0200100
	GrapeSMv01_13g0617	122.81	52.13	gtf2f2
	GrapeSMv01_18g0905	6.13	13.45	SPT
	GrapeSMv01_11g1256	29.7833	5.56333	XTH23
	GrapeSMv01_18g2167	11.8967	2.33	--
	GrapeSMv01_17g0145	27.3067	9.27333	At1g05350
	GrapeSMv01_01g0670	25.3733	2.24	--
	GrapeSMv01_11g1298	1.22667	5.90333	GDU3
	GrapeSMv01_03g1120	1.08	5.66333	CYP714C2
	GrapeSMv01_03g0650	21.8633	4.08667	CNR1
	GrapeSMv01_10g1550	12.8633	1.56	GSVIVT00004047001
	GrapeSMv01_16g0887	17.3767	35.25	VIT_16s0100g01030
	GrapeSMv01_14g0885	2.79333	6.73	KLCR2
	GrapeSMv01_04g0063	60.83	18.1533	RPL28A
	GrapeSMv01_03g0451	5.99	1.31667	At2g16250
	GrapeSMv01_14g0176	34	10.8	ALY4
	GrapeSMv01_05g0522	5.88	12.1033	--
	GrapeSMv01_11g1259	58.44	18.7167	XTH23
	GrapeSMv01_14g1632	3.02667	8.97667	EMB3004
	GrapeSMv01_05g1387	7.36333	62.9433	EP3
	GrapeSMv01_12g0582	2.15333	6.36	GH3.10
	GrapeSMv01_18g0281	28.8167	9.31667	ILL6
	GrapeSMv01_02g0489	3.35667	10.9767	PMEI11
	GrapeSMv01_15g0441	19.47	3.68667	HAT4
	GrapeSMv01_08g1191	184.423	87.12	BAS1
	GrapeSMv01_10g0362	24.17	5.71333	--
	GrapeSMv01_12g0871	21.7733	6.39667	At1g11050
	GrapeSMv01_11g1158	4.18	11.9633	PIRL6
	GrapeSMv01_07g0034	13.87	2.71	--
	GrapeSMv01_14g1738	4.09667	8.21333	TSO1
	GrapeSMv01_12g0340	4.43	9.87333	GLK1
	GrapeSMv01_19g0328	4.37	11.51	RTN4IP1
	GrapeSMv01_05g0888	38.0033	15.4533	trc
	GrapeSMv01_Sca0532	0.233333	15.2433	ABP19A
	GrapeSMv01_18g0046	23.2	4.46667	PPD3
	GrapeSMv01_15g1056	47.7567	16.5833	--
	GrapeSMv01_12g1431	26.4367	7.14	RABD1
	GrapeSMv01_18g0512	107.24	17.0333	UGT85A23
	GrapeSMv01_04g0039	0.436667	13.6033	At4g25140
	GrapeSMv01_14g0818	18.43	6.13667	GPAA1
	GrapeSMv01_04g0204	1.80333	8.26	ERF017
	MSTRG.21262	7.84667	2.01667	--
	GrapeSMv01_03g0112	12.18	4.60667	--
	GrapeSMv01_09g0367	24.58	5.94	IAA27
	GrapeSMv01_04g0493	84.4867	37.6933	CESA1
	GrapeSMv01_17g1249	53.62	22.4867	STT3B
	GrapeSMv01_18g0254	1.91333	4.28667	CYCA1-1
	MSTRG.18780	17.69	6.78	EIX2
	GrapeSMv01_12g0967	2.66333	6.13667	APUM7
	GrapeSMv01_06g0247	15.5467	4.63667	LYK3
	GrapeSMv01_12g0571	34.8433	8.02667	--
	GrapeSMv01_07g0210	85.7167	26.02	MGS1
	GrapeSMv01_01g1269	77.5233	33.4367	AAPT1
	GrapeSMv01_19g0606	8.97333	0.57	--
	GrapeSMv01_16g0596	6.57333	1.02	FER
	GrapeSMv01_14g1173	35.2	12.2333	MUB1
	GrapeSMv01_11g0306	17.1733	4.69667	mrm1
	GrapeSMv01_10g0920	34.9933	15.02	CTDSPL2
	GrapeSMv01_05g0390	18.67	6.01	NT5DC3
	GrapeSMv01_01g0028	91.6167	34.4567	MES11
	GrapeSMv01_07g1477	4.35	0.383333	LACS1
	GrapeSMv01_07g1852	33.1333	8.76667	PANC
	GrapeSMv01_18g2168	24.34	9.62333	RPV1
	GrapeSMv01_10g0406	140.603	53.9433	CRK29
	GrapeSMv01_01g0326	56.74	22.4267	MAP1B
	GrapeSMv01_19g0495	16.94	6.04	FH5
	GrapeSMv01_14g1951	426.503	212.73	UBI11
	GrapeSMv01_05g0905	18.51	6.3	Nom1
	GrapeSMv01_18g1779	11.9233	2.72333	EMB3003
	GrapeSMv01_11g0947	17.2167	4.93667	cemA
	GrapeSMv01_15g0655	17.2567	3.94667	CYP76T24
	GrapeSMv01_08g0726	6.61333	0.733333	SCPL45
	GrapeSMv01_02g0638	29.24	10.3267	--
	GrapeSMv01_16g0035	18.6333	5.59667	At4g27595
	GrapeSMv01_12g0998	39.72	14.6433	BAK1
	GrapeSMv01_03g1318	305.333	145.137	ZIP5
	GrapeSMv01_06g0420	9.44	2.09333	RWK1
	GrapeSMv01_15g0390	42.5133	17.6367	OVA9
	GrapeSMv01_13g0208	1.62667	8.37667	GLY1
	GrapeSMv01_15g1117	10.12	2.11667	BAM2
	GrapeSMv01_11g0831	260.283	122.67	Gtp-bp
	GrapeSMv01_11g0313	39.35	79.3133	--
	GrapeSMv01_16g1240	39.0767	13.7133	LRK10
	GrapeSMv01_14g1755	5.55333	0.333333	THT2
	GrapeSMv01_19g0635	20.7667	7.22	SBE3
	GrapeSMv01_14g0381	0.933333	4.63667	--
	GrapeSMv01_07g0100	168.463	79.6033	At5g48380
	MSTRG.21946	16.2867	0.16	VIT_19s0014g04930
	GrapeSMv01_13g0501	5.81	23.91	HSP18.2
	GrapeSMv01_18g0633	41.96	16.53	HVA22A
	GrapeSMv01_03g1237	144.963	60.3933	EXL2
	GrapeSMv01_11g0698	2.6	7.63	SD18
	GrapeSMv01_18g0511	24.7167	3.71	UGT85A24
	GrapeSMv01_03g1249	59.5433	26.8667	LIF2
	GrapeSMv01_10g0856	50.4467	13.5333	At1g07650
	GrapeSMv01_04g0929	9.82	2.25667	PUB9
	GrapeSMv01_06g0287	30.5033	11.5333	PDIL1-4
	GrapeSMv01_11g0396	3.38333	19.07	--
	GrapeSMv01_02g0075	41.6867	14.69	TIC32
	GrapeSMv01_06g0806	97.23	37.8167	At5g58770
	GrapeSMv01_05g1636	34.93	11.55	CTL2
	GrapeSMv01_08g1282	4.07333	13.5233	BIC1
	GrapeSMv01_14g1129	56.14	15.58	--
	GrapeSMv01_16g1023	3.28333	7.07667	--
	GrapeSMv01_18g0450	10.0233	1.77333	STP5
	GrapeSMv01_16g0289	9.9	1.55	AMC1
	GrapeSMv01_04g1404	25.8	8.48	AKRP
	GrapeSMv01_11g0528	0.001	31.87	HO1
	GrapeSMv01_08g1817	7.67333	184.43	GNS1
	GrapeSMv01_09g0603	0.0633333	7.90333	--
	GrapeSMv01_07g1832	0.293333	3.94667	At3g07010
	GrapeSMv01_07g0338	24.73	5.42333	PAS2A
	GrapeSMv01_17g0228	57.5767	21.04	TIFY6B
	GrapeSMv01_01g1680	6.59667	1.22	PCMP-H90
	GrapeSMv01_07g0921	30.6933	9.42333	MYB330
	GrapeSMv01_01g1690	3.27667	11.1167	--
	GrapeSMv01_06g1405	4.64667	12.7633	RZPF34
	GrapeSMv01_06g0269	24.6167	9.03667	TPST
	GrapeSMv01_01g0080	44.3	16.52	CLPF
	GrapeSMv01_16g1331	14.9233	32.2667	--
	GrapeSMv01_14g0330	19.9967	3.98	msrA
	GrapeSMv01_13g0621	9.36333	1.86667	SCPL27
	GrapeSMv01_16g1239	124.667	54.5867	LRK10
	GrapeSMv01_04g0358	12.61	3.28	ITN1
	GrapeSMv01_19g1319	112.877	52.7833	At1g56190
	GrapeSMv01_13g0860	6.90333	1.61	PDR2
	GrapeSMv01_11g0248	36.3233	12.3033	SAT5
	GrapeSMv01_13g0607	37.0833	11.86	IQD1
	GrapeSMv01_05g0097	2.16333	10.32	VEP1
	GrapeSMv01_01g0774	0.883333	3.08	--
	GrapeSMv01_16g0944	0.253333	5.13333	LTI65
	GrapeSMv01_06g1423	5.63333	14.95	ATL57
	GrapeSMv01_01g1264	2.51	6.19	CPN60B4
	GrapeSMv01_07g0718	14.76	5.68667	CSI1
	GrapeSMv01_12g1445	18.79	6.86333	At4g27220
	GrapeSMv01_11g1251	19.8433	4.54	XTH23
	GrapeSMv01_10g0514	90.9567	40.1467	PVA42
	GrapeSMv01_01g0362	45.7	10.32	--
	GrapeSMv01_05g0113	3.06333	9.26667	BZIP53
	GrapeSMv01_18g0280	42.6733	15.9233	HEMB1
	GrapeSMv01_01g0612	16.9767	35.6433	At1g14780
	GrapeSMv01_05g1435	10.4967	2.20333	--
	GrapeSMv01_11g0321	23.3267	4.67667	--
	GrapeSMv01_07g1019	21.9833	6.53667	PKP1
	GrapeSMv01_08g0382	70.91	29.4367	AMT2
	GrapeSMv01_12g0112	6.39333	0.556667	At1g07650
	GrapeSMv01_02g0835	17.5	4.48	--
	GrapeSMv01_07g0506	126.357	56.9333	ACA2
	GrapeSMv01_06g1170	7.20667	1	TUBB4
	GrapeSMv01_12g0029	70.4233	28.68	--
	GrapeSMv01_01g0117	25.6433	8.68	PTAC14
	GrapeSMv01_19g0867	56.2567	22.38	DDI1
	GrapeSMv01_18g1208	24.5367	10.21	At1g62020
	GrapeSMv01_05g0223	337.917	155.94	METK2
	GrapeSMv01_07g0168	8.72667	1.14333	Bp10
	GrapeSMv01_18g1617	0.406667	4.06667	TT10
	GrapeSMv01_10g0757	0.826667	4.37	TBL38
	GrapeSMv01_05g1101	2.90667	10.99	--
	GrapeSMv01_18g0510	9.03667	1.06333	-
	GrapeSMv01_07g1101	11.32	3.77	IDM1
	GrapeSMv01_05g0617	20.8767	6.49	LECRK4
	GrapeSMv01_18g0147	63.28	28.63	PREP
	GrapeSMv01_04g0229	95.2467	35.9333	LRK10
	GrapeSMv01_10g1454	18.2533	2.97	At5g66900
	GrapeSMv01_05g0004	59.5	21.6967	--
	GrapeSMv01_04g1483	461.447	193.243	MO2
	GrapeSMv01_14g1386	4.70667	10.7733	PP2B15
	GrapeSMv01_17g0593	31.71	11.39	PP2A
	GrapeSMv01_07g2116	14.0433	3.04333	UGT74E2
	GrapeSMv01_18g1909	0.153333	4.07333	TT10
	GrapeSMv01_04g0201	11.5467	3.13	3BETAHSD/D2
	GrapeSMv01_03g0686	12.33	4.24333	FPP7
	GrapeSMv01_02g0628	26.6167	9.55333	Os02g0636300
	GrapeSMv01_11g0411	1.66	25.9733	SULTR3;5
	GrapeSMv01_09g0963	3.76	7.55	UNI
	GrapeSMv01_06g1122	2.81	8.20333	--
	GrapeSMv01_11g0871	25.7467	10.8433	ATG11
	GrapeSMv01_16g1118	23.9633	5.88333	At5g24080
	GrapeSMv01_18g2443	43.35	18.5733	ARP1
	GrapeSMv01_08g0134	134.317	66.0533	MET
	GrapeSMv01_02g1256	36.49	11.92	At1g31830
	GrapeSMv01_04g1209	13.28	3.55667	At5g66470
	GrapeSMv01_17g0146	27.3367	10.1833	RIOK1
	GrapeSMv01_06g0471	7.94333	16.7933	--
	GrapeSMv01_13g0143	3.70667	15.02	RER6
	GrapeSMv01_09g0317	18.4	4.03	LYK3
	GrapeSMv01_13g0375	10.2233	1.66667	GGB
	GrapeSMv01_02g0272	20.0667	3.83667	--
	GrapeSMv01_14g0843	6.07	13.4733	NRT2.5
	GrapeSMv01_02g0171	40.57	14.7233	hpcH
	GrapeSMv01_05g0055	16.89	5.53667	APUM24
	GrapeSMv01_11g1228	5.9	15.4533	At5g57480
	GrapeSMv01_04g0992	18.3967	4.74333	--
	GrapeSMv01_18g2174	5.38333	1.05	DAR1
	MSTRG.4365	9.71667	1.31	ADH1
	GrapeSMv01_08g0525	33.8633	12.5833	TIC56
	GrapeSMv01_18g1160	21.14	4.07333	JMT
	GrapeSMv01_04g1104	65.1367	25.2467	DAR1
	GrapeSMv01_07g0981	7.27	0.46	ERF3
	GrapeSMv01_13g1098	19.6867	5.77333	At3g02645
	GrapeSMv01_13g0056	49.06	18.09	EFL1
	GrapeSMv01_19g1105	10.4233	1.65333	WAG1
	GrapeSMv01_18g1299	6.65667	16.6067	--
	GrapeSMv01_05g0074	35.7167	120.75	-
	GrapeSMv01_09g0385	19.5533	6.07	PDIL1-6
	GrapeSMv01_06g0271	14.8833	4.76333	ARF18
	GrapeSMv01_07g0697	5.74333	0.57	PLP1
	GrapeSMv01_16g0696	11.59	1.7	EXL3
	GrapeSMv01_03g0361	6.77667	0.51	--
	GrapeSMv01_06g1544	62.59	20.35	FDX3
	GrapeSMv01_18g0480	2.28333	6.73667	ANN1
	GrapeSMv01_09g1060	2.88667	6.06	ABCC13
	GrapeSMv01_02g0328	7.79333	2.09333	ABCC10
	GrapeSMv01_11g1260	13.4033	1.03	XTH23
	GrapeSMv01_14g0798	34.78	14.2633	STY13
	GrapeSMv01_05g0469	1.80667	4.87667	Os11g0547000
	GrapeSMv01_18g0171	238.803	113.573	CDSP32
	GrapeSMv01_16g0001	11.4	3.33667	ABCG11
	GrapeSMv01_07g0294	42.6733	18.1733	ATL55
	GrapeSMv01_07g0323	84.96	35.4367	CURT1D
	GrapeSMv01_01g0570	180.03	74.7567	PCR2
	GrapeSMv01_10g0379	0.983333	5.08667	SBT5.4
	GrapeSMv01_04g0199	30.3867	11.15	--
	GrapeSMv01_14g1662	4.33667	8.92	NHX2
	GrapeSMv01_08g0072	25.6733	10.67	LARP1A
	GrapeSMv01_05g0895	15.1033	4.10333	At3g23360
	GrapeSMv01_14g0662	468.14	204.85	NAC083
	GrapeSMv01_18g1321	27.94	10.2067	rpa12
	GrapeSMv01_04g0125	32.0067	10.22	RBP1
	GrapeSMv01_17g0891	41.95	16.17	NAT6
	GrapeSMv01_18g1038	18.42	4.69	--
	GrapeSMv01_15g1008	15.13	3.54333	--
	GrapeSMv01_18g0516	62.7867	21.7467	EXL2
	GrapeSMv01_05g1599	93.52	42.74	BHLH128
	GrapeSMv01_11g0122	17.63	5.23333	NFYA3
	GrapeSMv01_12g0499	0.23	3.06333	--
	GrapeSMv01_10g0537	31.8833	12.5833	CBP60B
	GrapeSMv01_19g0232	17.8167	5.82333	RBOHC
	GrapeSMv01_14g0705	6.83	13.9967	MTERF5
	GrapeSMv01_12g0556	30.87	8.94667	--
	GrapeSMv01_05g0793	50.0433	18.3233	--
	GrapeSMv01_14g0821	1.42	4.15	--
	GrapeSMv01_06g1511	18.44	4.92667	CYP94C1
	GrapeSMv01_19g0362	19.25	5.24667	CRPK1
	GrapeSMv01_07g1175	23.9233	8.31	TUFA
	GrapeSMv01_14g1622	5.16667	11.6033	--
	GrapeSMv01_10g0390	6.76667	1.79	RPP13
	GrapeSMv01_13g0734	0.243333	6.45667	ZAT5
	GrapeSMv01_06g0318	8.47667	2.33667	ARF4
	GrapeSMv01_14g1174	94.2833	45.3167	GAUT13
	GrapeSMv01_17g0118	0.16	1.94	--
	GrapeSMv01_10g1527	2.63667	0.166667	MIK2
	GrapeSMv01_11g1252	19.7467	3.04667	XTH23
	GrapeSMv01_11g1128	33.11	8.28667	ACD11
	GrapeSMv01_07g0830	31.24	11.27	MLO10
	GrapeSMv01_06g1497	1.25333	2.83333	POL2A
	GrapeSMv01_19g0613	35.6367	14.9167	BRD7
	GrapeSMv01_18g1825	50.98	20.39	PDIL5-2
[truncated: 4,329 more rows]

## Sheet: Table S7
	Table S7. Information of DEGs detected in control vs. Dro_ALA
	Gene ID	control_fpkm	Dro_fpkm	Symbol
	GrapeSMv01_01g0061	407.943	41.2633	UGD1
	GrapeSMv01_01g0298	44.6133	377.44	CHUP1
	GrapeSMv01_01g0507	12.7333	463.957	Dnajb8
	GrapeSMv01_01g0598	25.3433	251	ADO3
	GrapeSMv01_01g0827	652.603	5355.69	GOLS1
	GrapeSMv01_02g0243	5.68333	160.153	At5g39865
	GrapeSMv01_02g0503	11.6133	117.24	CYP76B6
	GrapeSMv01_02g0555	43.3467	403.693	CYP76B10
	GrapeSMv01_03g0044	310.757	1837.44	FBA1
	GrapeSMv01_03g0289	269.877	12.06	NAC022
	GrapeSMv01_03g0744	3.81667	145.993	--
	GrapeSMv01_03g1078	361.85	20.26	HVA22A
	GrapeSMv01_04g0803	22.1267	260.343	RVE1
	GrapeSMv01_04g1082	121.02	6.07	CRT3
	GrapeSMv01_05g0057	152.773	11.0433	SAG101
	GrapeSMv01_05g0695	14.53	198.97	ELIP1
	GrapeSMv01_05g1470	19.63	183.627	BBX25
	GrapeSMv01_06g0144	730.13	81.48	LOX2.1
	GrapeSMv01_06g1324	109.69	952.103	AGT1
	GrapeSMv01_07g0768	68.21	477.367	ABCF5
	GrapeSMv01_08g0310	35.8567	236.247	DGD1
	GrapeSMv01_08g0528	24.11	238	PFE2
	GrapeSMv01_08g0622	316.127	19.87	WRKY70
	GrapeSMv01_08g1482	29.2733	287.27	--
	GrapeSMv01_08g1553	10.0767	138.49	CHLH
	GrapeSMv01_11g0373	3.58667	64.98	At5g25630
	GrapeSMv01_11g1116	203.883	5.69333	APO3
	GrapeSMv01_11g1289	119.927	496.527	CIPK21
	GrapeSMv01_12g0525	67.3867	858.563	NPF6.4
	GrapeSMv01_12g0538	1356.75	96.6933	ACO3
	GrapeSMv01_13g1353	14.2933	302.827	LNK3
	GrapeSMv01_14g0453	12.73	142.077	COL2
	GrapeSMv01_15g0790	34.9633	345.013	LHY
	GrapeSMv01_15g0798	11.68	347.25	PRR95
	GrapeSMv01_15g0836	112.29	897.06	HOX22
	GrapeSMv01_15g1078	36.3	201.713	RVE5
	GrapeSMv01_16g0023	5.24667	65.26	IGHMBP2
	GrapeSMv01_16g0106	41.2567	192.393	SIGA
	GrapeSMv01_16g1176	14.8033	345.75	SIGE
	GrapeSMv01_16g1324	23.52	179.833	APRR5
	GrapeSMv01_17g0349	127.693	4.24667	SARD1
	GrapeSMv01_17g0775	23.2067	171.603	BHLH72
	GrapeSMv01_17g0913	34.4467	592.52	PUB19
	GrapeSMv01_18g0098	25.1867	226.923	At2g30600/At2g30610
	GrapeSMv01_18g1465	105.13	677.48	SDC
	GrapeSMv01_19g0187	64.0233	312.51	--
	GrapeSMv01_19g0901	23.03	197.517	FBA5
	MSTRG.18481	86.28	7.37667	RUN1
	MSTRG.7187	116.467	7.18	At5g66900
	GrapeSMv01_08g1022	202.45	991.01	RCA1
	GrapeSMv01_12g0048	35.1133	319.647	CAB40
	GrapeSMv01_12g0078	18.4	141.147	PSY
	GrapeSMv01_08g1163	37.6833	199.543	CAX3
	GrapeSMv01_17g0189	9.91333	124.99	--
	GrapeSMv01_11g0748	14.1767	123.66	GAPN
	GrapeSMv01_11g1293	36.0133	226.72	COL5
	GrapeSMv01_19g0687	244.847	32.4033	GDPDL4
	GrapeSMv01_04g0114	64	486.01	GDCSP
	GrapeSMv01_14g0169	25.2433	114.313	SPA15
	GrapeSMv01_12g1141	12.9667	120.543	GT6
	GrapeSMv01_08g0018	97.65	404.68	At2g38640
	GrapeSMv01_13g0436	17.4433	155.123	RCA
	GrapeSMv01_17g0626	37.7067	152.847	HOX16
	GrapeSMv01_08g0911	8.67333	85.5433	RVE8
	GrapeSMv01_18g0097	305.9	1256.66	CAT1
	GrapeSMv01_02g0150	7.18	93.9333	D27
	GrapeSMv01_11g0619	15.4267	96.76	ANTR6
	GrapeSMv01_08g1169	7.19333	45.6333	TMK2
	GrapeSMv01_05g0239	14.6267	136.567	--
	GrapeSMv01_18g0587	599.477	82.97	PUMP5
	MSTRG.15325	42.13	1.74667	RPV1
	GrapeSMv01_09g0090	554.117	43.8633	LOX3.1
	GrapeSMv01_17g0347	112.953	7.61	SARD1
	GrapeSMv01_14g0741	9.72667	94.3833	RCOM_0530710
	GrapeSMv01_14g0409	114.223	4.90667	AOC
	GrapeSMv01_06g0559	909.037	3012.54	RCA1
	GrapeSMv01_Sca0038	31.1667	138.973	SPS1
	GrapeSMv01_06g0681	40.57	220.067	At2g29260
	GrapeSMv01_01g0780	140.8	571.87	GGAT2
	GrapeSMv01_06g0782	26.0267	144.413	ANTR1
	GrapeSMv01_02g0871	278.517	1747.85	BAM3
	GrapeSMv01_01g0321	48.85	211.463	STN7
	GrapeSMv01_09g0658	3.67667	66.5833	ADS3
	GrapeSMv01_04g1297	89.66	442.013	FBA2
	GrapeSMv01_08g0505	80.73	312.08	CRD1
	GrapeSMv01_10g0793	2.82667	49.4433	CIPK5
	GrapeSMv01_02g0637	150.84	15.8767	RBL2
	GrapeSMv01_09g1199	295.667	31.89	--
	GrapeSMv01_07g0907	362.317	64.0167	B3GALT7
	GrapeSMv01_18g1308	313.417	42.6667	HSP90
	GrapeSMv01_09g0415	100.687	4.38	IQM4
	GrapeSMv01_04g1471	171.223	682.207	HMGB2
	GrapeSMv01_07g0531	4.55667	52.6167	CGLD27
	GrapeSMv01_14g0803	93.2333	323.403	--
	GrapeSMv01_07g1233	101.573	330.157	YUC10
	GrapeSMv01_18g0108	2.73667	65.8567	CYP87A3
	GrapeSMv01_18g0290	15.8233	122.41	CAO
	GrapeSMv01_07g1093	8.84667	57.9267	FLZ8
	GrapeSMv01_14g1232	41.7433	170.873	NEAP3
	GrapeSMv01_10g1016	138.263	12.86	OSCBPY
	GrapeSMv01_19g0644	726.187	2516.59	VTC2
	GrapeSMv01_03g0386	30.75	204.21	PHOT2
	GrapeSMv01_10g0865	100.71	10.4467	CAD1
	GrapeSMv01_18g0417	4.65	53.7933	ST3
	GrapeSMv01_18g0386	38.3367	134.15	SHM7
	GrapeSMv01_18g1193	55.7967	218.26	--
	GrapeSMv01_11g1301	34.22	200.12	COL5
	GrapeSMv01_18g0928	19.78	118.567	COR27
	GrapeSMv01_12g0722	214.207	29.0567	DGK5
	GrapeSMv01_09g0983	5.58	52.6567	CIPK25
	GrapeSMv01_02g0576	145.087	438.78	SGR
	GrapeSMv01_19g0188	67.09	324.283	JA2L
	GrapeSMv01_11g0741	135.21	463.243	CIPK6
	GrapeSMv01_09g0044	10.91	109.837	HSP17.4B
	GrapeSMv01_19g1046	107.807	391.85	GLO1
	GrapeSMv01_08g1430	159.257	5.44333	RZPF34
	GrapeSMv01_11g0540	39.73	190.953	EBF2
	GrapeSMv01_05g0385	32.8767	259.583	--
	GrapeSMv01_07g1150	28.4333	188.507	EDL3
	MSTRG.872	2.28	26.9133	IGHMBP2
	GrapeSMv01_10g0042	198.243	14.9067	GPT2
	GrapeSMv01_14g1106	81.7367	8.01	--
	GrapeSMv01_01g0762	15.7833	79.67	PHT2-1
	GrapeSMv01_03g1074	102.907	8.93667	HVA22A
	GrapeSMv01_18g1113	25.6633	166.447	At1g01500
	GrapeSMv01_18g1726	57.7667	6.31333	CESA2
	GrapeSMv01_10g0277	178.783	24.8033	RGLG2
	GrapeSMv01_11g0379	68.7133	205.357	NYC1
	GrapeSMv01_06g1235	19.27	88.3267	At2g26850
	GrapeSMv01_08g1554	10.9933	148.173	CHLH
	GrapeSMv01_08g0529	3.94667	51.83	mcfF
	GrapeSMv01_16g1387	48.8533	194.937	PPH1
	GrapeSMv01_18g0461	28.3833	104.37	CRY1
	GrapeSMv01_05g0169	38.3267	139.613	--
	GrapeSMv01_02g0157	18.25	135.753	CYP78A3
	GrapeSMv01_05g0128	8.67667	55.3433	HCF107
	GrapeSMv01_07g0075	5.54	65.5367	--
	GrapeSMv01_07g0523	10.4567	60.5433	SR1IP1
	GrapeSMv01_05g1723	7.21	63.6567	UGT75C1
	GrapeSMv01_08g0659	61.4833	223.477	CRD1
	GrapeSMv01_18g1037	403.963	54.1267	AOS1
	GrapeSMv01_04g0046	22.0067	117.27	At2g19810
	GrapeSMv01_17g0956	5.41667	67.8567	apaG
	GrapeSMv01_06g0389	243.257	39.9033	NTF6
	GrapeSMv01_09g0669	40.1767	152.123	KEG
	GrapeSMv01_16g0150	68.02	7.96	CSLD3
	GrapeSMv01_03g0422	11.9833	66.8233	At2g16365
	GrapeSMv01_18g0514	89.7267	3.34	PHI-1
	GrapeSMv01_04g1329	210.867	41.0933	CPK28
	GrapeSMv01_13g0723	58.4267	201.923	--
	GrapeSMv01_05g0754	21.7	70.9433	--
	GrapeSMv01_03g0103	184.913	602.36	--
	GrapeSMv01_10g1028	187.05	5.63333	TIFY5A
	GrapeSMv01_10g1458	158.353	16.4067	At5g66900
	GrapeSMv01_19g0054	82.5567	371.057	--
	GrapeSMv01_05g1311	5.99	76.8667	DBR
	GrapeSMv01_13g0072	83.9767	6.29333	FAD7A-1
	GrapeSMv01_08g0291	70.27	5.53	CPK1
	GrapeSMv01_18g1350	21.5833	125.137	--
	GrapeSMv01_01g0359	29.2567	119.387	NPF3.1
	GrapeSMv01_08g0578	92.0767	5.57667	PNC1
	GrapeSMv01_04g0680	116.867	370.957	COL4
	GrapeSMv01_18g1082	51.22	173.903	JAC1
	GrapeSMv01_18g1058	114.917	4.85333	CML41
	GrapeSMv01_03g0359	355.28	74.3767	CPK6
	GrapeSMv01_16g0998	7.84667	73.5933	--
	GrapeSMv01_14g1335	334.69	48.15	CBP60D
	GrapeSMv01_16g0451	111.617	20.5867	PUB52
	GrapeSMv01_09g0067	486.733	83.2133	TIFY10A
	GrapeSMv01_14g0662	468.14	45.9667	NAC083
	GrapeSMv01_05g1334	18.3967	86.17	BT3
	MSTRG.22911	0.92	26.9433	ACD6
	GrapeSMv01_14g1110	95.0933	12.2533	GALT1
	GrapeSMv01_03g0897	10.02	159.677	PSK
	GrapeSMv01_15g0968	206.903	23.3133	WRKY53
	GrapeSMv01_07g1223	3.53	39.0933	ROPGAP2
	GrapeSMv01_01g0287	27.0567	109.433	PPC4
	GrapeSMv01_11g0808	24.39	110.283	GAPN
	GrapeSMv01_08g1662	68.79	247.4	At1g08570
	GrapeSMv01_13g0445	169.457	469.137	PP2CA
	GrapeSMv01_18g0612	56.71	163.167	--
	GrapeSMv01_11g0881	17.8967	100.37	TSS
	GrapeSMv01_07g0709	102.197	9.79333	AAO
	GrapeSMv01_05g0572	228.96	667.697	TSJT1
	GrapeSMv01_05g0691	109.5	337.41	VIT_05s0020g04070
	GrapeSMv01_18g1924	42.55	4.64	RPV1
	GrapeSMv01_11g0543	91.02	346.053	--
	GrapeSMv01_06g0061	13.9867	78.8533	PTC52
	GrapeSMv01_08g1031	8.82667	86.94	At2g29150
	GrapeSMv01_13g0647	38.02	225.55	PIP2-1
	GrapeSMv01_01g0952	86.3267	8.05667	ILL1
	GrapeSMv01_14g1838	58.8467	177.91	At2g30620
	GrapeSMv01_05g0493	22.7467	106.737	NHX2
	GrapeSMv01_01g0658	497.487	1829.1	COR2
	GrapeSMv01_06g1469	100.637	9.87333	ADT3
	GrapeSMv01_14g0956	65.5167	5.92	AATP1
	GrapeSMv01_13g0412	6.40333	65.34	RCA
	GrapeSMv01_07g1376	105.443	10.8567	ERF071
	GrapeSMv01_14g1159	14.3233	83.1867	--
	GrapeSMv01_02g0275	195.997	33.3	ATL21A
	GrapeSMv01_01g1310	2.05333	29.4367	CPN60B4
	GrapeSMv01_17g0561	478.873	91.2	UAM1
	GrapeSMv01_05g0746	75.8767	2.08333	BHLH92
	GrapeSMv01_Sca0223	2.45333	23.9033	KAT2
	GrapeSMv01_13g1093	19.3033	86.7467	ZIFL1
	GrapeSMv01_06g0982	37.6067	158.783	RPT2
	GrapeSMv01_12g0810	95.45	2.82	--
	GrapeSMv01_05g0748	91.3533	364.397	At2g30620
	GrapeSMv01_17g1084	141.183	19.5467	SOBIR1
	GrapeSMv01_16g1408	77.9333	230.65	CLPX1
	GrapeSMv01_14g0213	93.4467	9.46	--
	GrapeSMv01_11g0802	51.0867	158.61	CIPK6
	GrapeSMv01_06g0094	209.34	14.3767	DIR7
	GrapeSMv01_19g0791	89.8667	264.937	CSLE6
	GrapeSMv01_06g0088	22.2933	99.2533	--
	GrapeSMv01_01g0893	27.2433	132.28	PUB18
	GrapeSMv01_17g0262	590.19	118.627	CML27
	GrapeSMv01_11g1110	7.92	46.32	CIA2
	GrapeSMv01_13g0554	264.957	730.603	At3g55800
	GrapeSMv01_16g1048	258.687	25.5733	HIPP39
	GrapeSMv01_12g1034	42.2733	2.91667	BAK1
	GrapeSMv01_08g1615	11.5433	81.5067	--
	GrapeSMv01_01g0997	71.2333	272.847	GSTU17
	GrapeSMv01_18g0960	14.5633	78.8733	CXE2
	GrapeSMv01_18g0275	82.6433	9.24	ASP1
	GrapeSMv01_02g1045	32.0333	2.39667	JMJ706
	GrapeSMv01_17g0154	11.7367	55.5033	KING1
	GrapeSMv01_02g0769	15.0733	62.9633	NUDT8
	GrapeSMv01_11g0361	175.897	31.8967	AIM1
	GrapeSMv01_02g0538	17.7733	88.4667	ACS10
	GrapeSMv01_12g0706	133.183	7.37	MYB4
	GrapeSMv01_13g0174	1.01	114.897	--
	GrapeSMv01_18g0796	41.9633	149.583	DAD2
	GrapeSMv01_08g0465	94.16	7.30333	PNC1
	GrapeSMv01_19g0906	96.3667	319.303	PSAG
	GrapeSMv01_01g0223	30.61	91.9067	PAB2
	GrapeSMv01_06g0819	106.807	313.71	PDX1
	GrapeSMv01_11g0876	80.5933	203.503	--
	GrapeSMv01_17g0738	21.8433	81.1367	LONRF2
	GrapeSMv01_17g0540	18.5633	83.68	DOF5.4
	GrapeSMv01_08g0756	7.25333	40.5867	UGT86A1
	GrapeSMv01_10g0977	1.73	16.71	KAT2
	GrapeSMv01_18g0554	39.7533	140.037	PUP1
	GrapeSMv01_19g0541	336.85	1116.63	THI1-1
	GrapeSMv01_18g0555	12.3267	78.41	PUP1
	GrapeSMv01_14g0530	69.8767	9.67667	FER
	GrapeSMv01_12g0117	212.13	494.007	HSP17.7
	GrapeSMv01_07g1643	144.207	20.2333	MYB14
	GrapeSMv01_08g0786	192.147	540.15	CP29B
	GrapeSMv01_07g2165	1.99	40.6433	--
	GrapeSMv01_02g0487	40.7167	155.16	fusA2
	GrapeSMv01_05g1022	67.3867	235.407	BAM1
	GrapeSMv01_08g1086	112.383	23.2333	IPCS1
	GrapeSMv01_16g0967	86.9167	370.557	AAE3
	GrapeSMv01_16g0839	12.19	43.71	ABCB28
	GrapeSMv01_03g0319	49.6667	1.11333	Bp10
	GrapeSMv01_01g1638	7.81667	47.5033	BAG5
	GrapeSMv01_10g0694	104.317	274.957	TPT
	GrapeSMv01_06g0397	6.24333	32.5333	PHOT1
	GrapeSMv01_01g0530	104.193	9.3	--
	GrapeSMv01_18g1043	96.9433	6.87667	--
	GrapeSMv01_18g0021	34.98	119.8	--
	GrapeSMv01_18g0923	239.213	650.05	ABF2
	GrapeSMv01_12g1156	37.0933	3.42333	RUN1
	GrapeSMv01_03g1176	98.47	10.3767	RIBA1
	GrapeSMv01_18g1365	139.09	18.3033	--
	GrapeSMv01_03g0457	8.82	56.1833	At1g01500
	GrapeSMv01_10g0110	74.0033	297.107	2022-04-03
	GrapeSMv01_18g0084	298.177	674.23	HMGB3
	GrapeSMv01_05g1023	128.383	474.17	BAM1
	GrapeSMv01_07g1543	90.4167	269.997	--
	GrapeSMv01_06g1574	67.09	3.30333	NAC090
	GrapeSMv01_07g1556	115.347	340.163	WRKY6
	GrapeSMv01_15g0878	3.56333	31.3767	PRCP
	GrapeSMv01_14g1127	13.6133	100.553	NAC100
	GrapeSMv01_15g0997	193.997	438.91	CPRF1
	GrapeSMv01_09g1164	53.84	5.10667	PGDH2
	GrapeSMv01_17g0853	39.2167	148.683	MYBS3
	GrapeSMv01_18g0671	83.5967	15.6933	RLK7
	GrapeSMv01_13g0720	42.58	122.223	--
	GrapeSMv01_17g0926	73.3867	189.923	EX2
	GrapeSMv01_17g0733	29.5433	81.4733	APRR1
	GrapeSMv01_02g0323	21.6933	93.9433	CPRF1
	GrapeSMv01_04g0543	474.327	119.18	WRKY40
	GrapeSMv01_11g0096	99.64	20.6833	OFUT35
	GrapeSMv01_03g0450	601.88	1909.07	RBG7
	GrapeSMv01_02g0976	14.3267	40.98	--
	GrapeSMv01_14g0237	7.34333	87.62	--
	GrapeSMv01_01g1069	83.0167	10.8533	UTR3
	GrapeSMv01_05g1282	73.14	12.6833	MLO1
	GrapeSMv01_07g0522	14.7367	77.9233	--
	GrapeSMv01_07g0032	41.25	2.68333	--
	GrapeSMv01_13g1708	47.41	126.093	MKRN
	GrapeSMv01_02g0743	41.0767	138.83	HAT4
	GrapeSMv01_15g1021	19.5967	83.68	sld1
	GrapeSMv01_06g0258	23.2467	68.5767	WAV3
	GrapeSMv01_04g1710	117.46	15.19	PILS3
	GrapeSMv01_18g1123	349.827	57.4067	At2g16250
	GrapeSMv01_17g0348	46.3133	1.77	SARD1
	GrapeSMv01_14g0967	132.55	25.8733	--
	GrapeSMv01_11g0477	90.51	8.8	--
	GrapeSMv01_18g2340	77.01	6.96333	ZED1
	GrapeSMv01_10g1030	98.2233	4.84667	TIFY5A
	GrapeSMv01_19g0153	41.7667	126.583	CNGC4
	GrapeSMv01_02g0400	94	307.637	BEL1
	GrapeSMv01_19g0793	42.0633	88.15	AIM32
	GrapeSMv01_15g0776	71.15	8.38333	NTL9
	GrapeSMv01_06g0381	181.173	36.02	MPK3
	GrapeSMv01_19g0166	19.8567	96.4267	--
	GrapeSMv01_09g0504	21.16	0.606667	PDR1
	GrapeSMv01_01g1020	39.8833	105.99	TLP1
	GrapeSMv01_19g0710	218.35	52.4433	PAT1
	GrapeSMv01_02g0975	178.217	423.543	--
	GrapeSMv01_06g0849	16.65	52.9967	FKFBP
	GrapeSMv01_05g0488	389.353	839.497	BAM9
	GrapeSMv01_07g0260	6.74667	43.7033	UGT85K5
	GrapeSMv01_05g0708	15.9533	1.69667	ACA13
	GrapeSMv01_11g0719	3.79	29.3067	PRCP
	GrapeSMv01_12g0580	11.48	54.62	--
	GrapeSMv01_01g1264	2.51	22.0933	CPN60B4
	GrapeSMv01_01g0224	2.94	48.3433	--
	GrapeSMv01_10g0499	6.40667	45.0033	PCR8
	GrapeSMv01_18g0819	32.16	1.71	--
	GrapeSMv01_07g0275	5.88333	36.7367	ABCG11
	GrapeSMv01_07g0861	14.0267	52.0867	UVR8
	GrapeSMv01_16g0044	44.0833	131.507	--
	GrapeSMv01_17g0630	119.617	335.36	HIR1
	GrapeSMv01_11g1169	42.19	138.017	DBR
	GrapeSMv01_04g1453	143.777	27.86	PSAT2
	GrapeSMv01_12g0786	229.933	747.993	CAB-151
	GrapeSMv01_01g0689	128.947	302.94	PSBY
	GrapeSMv01_19g0253	30.3767	80.85	SPA3
	GrapeSMv01_13g0125	57.65	216.537	FER2
	GrapeSMv01_06g1449	118.023	21.1033	AXS2
	GrapeSMv01_08g1309	16.06	45.35	--
	GrapeSMv01_04g1563	29.6733	5.33667	LECRK1
	GrapeSMv01_17g1093	30.5133	105.127	BT1
	GrapeSMv01_13g0261	7.36	38.5133	EXO70H1
	GrapeSMv01_12g0707	72.57	5.39333	MYB4
	GrapeSMv01_13g0161	2.99333	24.5567	NPF5.1
	GrapeSMv01_02g0158	170.41	391.073	MGL
	GrapeSMv01_19g0993	55.6533	153.797	CYP72A225
	GrapeSMv01_18g0892	53.85	166.81	ERF010
	GrapeSMv01_10g0587	143.677	26.8033	AS1
	GrapeSMv01_04g1241	243.393	579.083	RD19A
	GrapeSMv01_18g1959	32.54	4.17	RPV1
	GrapeSMv01_12g0696	54.8233	134.143	--
	GrapeSMv01_08g1467	6.89667	41.4367	AVT1A
	GrapeSMv01_12g0382	2.32333	17.8933	SPA3
	MSTRG.12971	6.00333	25.36	MIK2
	GrapeSMv01_14g1165	14.1667	47.72	CNGC2
	GrapeSMv01_03g0754	48.83	5.12667	GH3.1
	GrapeSMv01_14g1418	65.24	7.85	RBOHB
	GrapeSMv01_12g0273	59.2967	178.8	TBL39
	GrapeSMv01_03g0665	7.59	43.51	COR27
	GrapeSMv01_06g0028	26.4633	86.81	MET1
	GrapeSMv01_08g1092	37.7967	108.347	FBP
	GrapeSMv01_10g0726	57.2967	4.85	GLR2.9
	GrapeSMv01_07g1371	46.8067	112.48	RSH1
	GrapeSMv01_18g1236	1.21333	34.2533	CYP71A1
	GrapeSMv01_10g0059	118.587	11.7433	OSCA1
	GrapeSMv01_05g1704	11.7267	50.2867	ypfD
	GrapeSMv01_11g0103	11.7267	50.2867	ypfD
	GrapeSMv01_18g1068	58.8633	4.4	At2g23790
	GrapeSMv01_10g0484	85.7633	16.34	SD18
	GrapeSMv01_09g0628	64.7833	168.2	RH15
	GrapeSMv01_09g0395	54.2633	139.523	GL2
	GrapeSMv01_Sca0157	22.5	63.0733	ABCB28
	GrapeSMv01_Sca0259	181.33	41.7933	UGD1
	GrapeSMv01_01g1119	7.63	37.5667	CDF3
	GrapeSMv01_10g1108	25.99	117.573	ABCC2
	GrapeSMv01_13g0453	2.13667	21.7767	UVR8
	GrapeSMv01_18g0253	24.0933	74.1467	--
	GrapeSMv01_07g0513	3.81333	20.24	NPY2
	GrapeSMv01_04g0658	60.0633	161.13	TIC55
	GrapeSMv01_18g1932	14.82	61.3567	ndhT
	GrapeSMv01_19g0863	159.157	518.13	ATJ11
	GrapeSMv01_01g0613	19.21	51.0667	TPS6
	GrapeSMv01_18g1778	81.87	13.3433	PXC3
	GrapeSMv01_05g0347	19.2133	1.05	BOR2
	GrapeSMv01_01g1736	22.3633	1.58	RBOHC
	GrapeSMv01_10g0264	14.1167	58.3633	TDT
	GrapeSMv01_01g1435	64.8767	179.34	HHL1
	GrapeSMv01_12g0397	20.9667	111.737	--
	GrapeSMv01_17g0701	20.9567	83.62	CHLP
	GrapeSMv01_11g0015	21.98	63.5667	FAB1B
	GrapeSMv01_15g0933	33.04	108.007	TSS
	GrapeSMv01_11g0069	28.0133	80.1833	ALDH7B4
	GrapeSMv01_07g1208	164.247	350.573	GID1B
	GrapeSMv01_02g0887	142.67	14.04	NCS1
	GrapeSMv01_18g0240	25.9333	76.4833	NADK2
	GrapeSMv01_08g0382	70.91	11.9267	AMT2
	GrapeSMv01_14g1112	53.6967	8.23667	--
	GrapeSMv01_05g0517	25.5967	90.9233	At4g15545
	GrapeSMv01_05g1120	37.1433	105.667	sll0005
	GrapeSMv01_04g0095	34.0867	149.377	GRXC6
	GrapeSMv01_01g1667	51.16	2.14333	TIFY9
	GrapeSMv01_04g0094	40.3533	116.363	HSF30
	GrapeSMv01_14g0960	35.3533	0.73	AATP1
	GrapeSMv01_15g0504	10.6867	39.7033	UNE10
	GrapeSMv01_07g1117	100.343	297.92	TIC
	GrapeSMv01_07g0716	67.67	3.03667	HIPP23
	GrapeSMv01_10g0026	120.993	353.933	THI1-2
	GrapeSMv01_07g2068	58.8933	140.763	PUB9
	GrapeSMv01_09g1053	208.067	35.5933	WRKY40
	GrapeSMv01_17g0608	12.82	54.8133	--
	GrapeSMv01_05g1367	119.793	254.243	IQD14
	GrapeSMv01_07g0998	36.6333	0.706667	At2g30550
	GrapeSMv01_14g1117	15.1233	71.46	CDF2
	GrapeSMv01_15g0960	40.5533	148.837	PYL9
	GrapeSMv01_02g1304	118.893	22.1667	PAE8
	GrapeSMv01_12g1052	62.01	3.2	poxN1
	GrapeSMv01_13g0169	116.627	235.75	CIPK2
	GrapeSMv01_13g1821	18.4767	72.8267	MFSD12
	GrapeSMv01_07g0551	36.1433	2.61667	GH3.1
	GrapeSMv01_07g0158	80.8267	208.953	SABP2
	GrapeSMv01_05g1661	5.97333	32.13	PIN1D
	GrapeSMv01_19g0129	20.3067	78.7833	--
	GrapeSMv01_18g1259	31.3967	72.04	XRN3
	GrapeSMv01_06g0654	15.6167	47.0967	FTSH9
	GrapeSMv01_08g0307	429.9	1060.03	BLH1
	GrapeSMv01_07g0335	36.0567	92.8067	KIN14A
	GrapeSMv01_11g0894	18.4167	76.2233	SAMDC
	GrapeSMv01_02g1266	438.523	73.2167	AOX3
	GrapeSMv01_10g1445	43.9867	1.27333	tmem53-a
	GrapeSMv01_10g0119	37.3167	106.4	SS3
	GrapeSMv01_02g0841	208.993	24.78	--
	GrapeSMv01_05g1231	20.4133	57.5633	SPS3
	GrapeSMv01_15g0774	97.5433	18.6333	NTL9
	GrapeSMv01_04g0133	57.88	4.87333	WRKY50
	GrapeSMv01_19g1015	109.633	248.08	HEBP2
	GrapeSMv01_10g0768	39.2567	108.003	BHLH30
	GrapeSMv01_07g1432	44.9	139.467	--
	GrapeSMv01_08g1585	62.5	210.997	SVR3
	GrapeSMv01_07g1206	62.2567	136.48	DCAF11
	GrapeSMv01_16g0200	32.8933	99.54	--
	GrapeSMv01_05g1329	39.2533	111.38	UGT74F2
	GrapeSMv01_07g0689	26.5433	80.07	KRP7
	GrapeSMv01_04g1290	142.333	371.267	CYP84A1
	GrapeSMv01_08g0266	12.06	54.0433	--
	GrapeSMv01_13g0656	105.773	19.3567	GATA8
	GrapeSMv01_06g1547	72.5967	9.48333	CML48
	GrapeSMv01_05g1702	12.8167	47.32	At4g12980
	GrapeSMv01_19g1086	71.2633	268.643	PARC
	GrapeSMv01_10g1043	59.59	160.79	TCP2
	GrapeSMv01_11g0601	55.8967	145.33	SPS1
	GrapeSMv01_12g1146	35.7533	123.653	GT6
	GrapeSMv01_06g1047	46.4767	6.38333	yjlD
	GrapeSMv01_09g0091	238.813	57.5033	CYP92C6
	GrapeSMv01_18g2417	34.27	4.31667	RPV1
	GrapeSMv01_10g1032	240.873	486.837	GLO1
	MSTRG.18169	3.23333	38.2333	IGHMBP2
	GrapeSMv01_07g0176	36.88	5.26667	At5g66900
	GrapeSMv01_17g1026	77.8967	218.19	--
	GrapeSMv01_04g0090	158.65	27.8367	IQM4
	GrapeSMv01_13g0550	22.5167	73.9333	At2g39920
	GrapeSMv01_Sca0135	2.45333	24.4367	BBX19
	GrapeSMv01_07g1495	14.4133	77.9567	GOLS2
	GrapeSMv01_11g1259	58.44	1.14333	XTH23
	GrapeSMv01_09g1343	3.61667	155.15	--
	GrapeSMv01_06g0696	79.2767	204.807	SAG113
	GrapeSMv01_07g0261	31.3333	118.137	UGT85K5
	GrapeSMv01_01g0774	0.883333	9.88333	--
	GrapeSMv01_07g1232	13.5667	36.27	DEGP2
	GrapeSMv01_12g0693	5.25	34.1967	--
	GrapeSMv01_06g1541	3.95667	33.88	BIC1
	GrapeSMv01_01g0638	120.53	268.393	XTH27
	GrapeSMv01_04g0387	47.38	125.537	LSI2
	GrapeSMv01_18g0170	35.8833	100.493	SMT2
	GrapeSMv01_16g0892	94.4333	9.96	GSVIVT00004047001
	GrapeSMv01_11g0173	126.13	36.16	MKK2
	GrapeSMv01_18g0553	24.74	97.2867	PUP1
	GrapeSMv01_06g1039	65.4633	158.257	BLH1
	GrapeSMv01_18g0950	17.6767	66.1433	BKI1
	GrapeSMv01_13g1568	31.86	2.81667	Os01g0939600
	GrapeSMv01_02g1328	24.5667	84.26	--
	MSTRG.12974	7.28667	27.5233	MIK2
	GrapeSMv01_17g0719	17.7667	66.3067	NAC100
	GrapeSMv01_18g2082	43.9433	99.42	CEPR2
	GrapeSMv01_01g0894	17.3667	85.2867	PUB18
	MSTRG.18973	65.5133	11.7833	SBT3.3
	GrapeSMv01_14g1356	272.45	720.46	At1g56220
	GrapeSMv01_04g0124	141.303	40.6533	--
	GrapeSMv01_18g0720	427.023	76.89	PSK3
	GrapeSMv01_07g0218	87.1	243.15	RAP2-4
	GrapeSMv01_10g1371	38.19	121.167	FTRV
	GrapeSMv01_05g0200	43.6833	144.037	At3g62260
	GrapeSMv01_08g0766	18.76	52.25	SIGF
	GrapeSMv01_10g0175	8.75333	39.1767	--
	GrapeSMv01_02g0258	88.5467	252.37	UGE5
	GrapeSMv01_07g1174	119.613	244.45	--
	GrapeSMv01_12g1140	7.44	43.4967	GT6
	GrapeSMv01_04g0355	134.37	30.9167	CCDC25
	GrapeSMv01_07g1300	382.313	945.31	GSTF8
	GrapeSMv01_06g0529	5.45333	35.8133	--
	GrapeSMv01_05g0947	20.8567	2.24	--
	GrapeSMv01_18g0515	47.99	3.82333	PHI-1
	GrapeSMv01_11g0659	244.14	548.06	--
	GrapeSMv01_08g0965	73.64	15.5533	XBAT31
	GrapeSMv01_17g0004	161.853	42.6033	CNX1
	GrapeSMv01_19g0330	77.7367	215.023	Os07g0631100
	GrapeSMv01_10g0058	78.6033	7.41333	CSC1
	GrapeSMv01_15g0615	1.00333	13.6267	At4g22990
	GrapeSMv01_01g1076	114.573	26.0733	SKIP11
	GrapeSMv01_03g0004	21.9433	58.3767	BLH7
	GrapeSMv01_11g1171	13.1633	54.0833	DBR
	GrapeSMv01_10g0558	43.7667	1.89333	NDA1
	GrapeSMv01_04g0032	59.5533	9.78	RLK5
	GrapeSMv01_03g0662	12.1567	48.3133	CYP707A1
	GrapeSMv01_18g0056	16.42	45.48	PMI1
	GrapeSMv01_Sca0134	61.05	10.93	GMD1
	GrapeSMv01_16g1175	66.07	4.82333	WRKY53
	GrapeSMv01_07g0711	39.05	4.62333	AAO
	GrapeSMv01_12g0857	31.9767	104.363	XERICO
	GrapeSMv01_03g0458	19.5767	55.92	At1g63850
	GrapeSMv01_17g0885	34.3933	104.093	At5g50100
	GrapeSMv01_01g1293	37.6367	6.98	DIM
	GrapeSMv01_11g0578	149.647	433.31	RFS6
	GrapeSMv01_05g0935	137.777	431.873	NPF5.2
	GrapeSMv01_02g0091	12.39	32.3167	GT-2
	GrapeSMv01_04g1071	20.8067	79.71	--
	GrapeSMv01_14g1959	12.4367	36.8333	--
	GrapeSMv01_05g0443	13.4033	41.5967	At3g16560
	GrapeSMv01_08g1091	339.9	69.1433	--
	GrapeSMv01_04g0225	435.18	1034.56	PMA4
	GrapeSMv01_15g0786	17.5267	47.9733	DCL1
	GrapeSMv01_16g1198	47.6233	7.67333	LRK10
	GrapeSMv01_17g0129	81.18	12.49	At5g63520
	GrapeSMv01_03g0043	34.4233	139.417	COR27
	GrapeSMv01_05g1167	20.91	0.96	BHLH62
	GrapeSMv01_07g0744	74.4633	180.417	ABC1K8
	GrapeSMv01_03g0684	67.18	142.657	WSD1
	GrapeSMv01_16g0855	69.9267	150.537	SLK2
	GrapeSMv01_16g1210	37.49	93.36	LRK10
	GrapeSMv01_01g0826	256.34	601.42	ISU1
	GrapeSMv01_09g1042	20.8433	1.73	RUN1
	GrapeSMv01_13g1621	71.6267	189.837	CCR1
	GrapeSMv01_13g0366	47.3267	3.33	--
	GrapeSMv01_15g1018	83.0367	191.437	--
	GrapeSMv01_18g0493	30.6767	99.18	CRY1
	GrapeSMv01_16g1049	274.967	46.02	HIPP39
	GrapeSMv01_04g0814	68.65	153.043	GAD1
	GrapeSMv01_09g1264	30.8567	3.25333	At3g50940
	GrapeSMv01_07g1324	52.1867	132.163	--
	GrapeSMv01_03g0186	35.18	92.47	MSI3
	GrapeSMv01_05g0295	10.9033	37.6833	At3g16560
	GrapeSMv01_12g0089	24.1833	61.51	PIF4
	GrapeSMv01_08g0513	737.997	210.373	CAM-1
	GrapeSMv01_08g0386	40.0333	95.73	ASIL2
	GrapeSMv01_14g0705	6.83	35.2333	MTERF5
	GrapeSMv01_13g1613	167.773	342.287	RPL1
	GrapeSMv01_15g0874	28.4867	1.62333	MYB3
	GrapeSMv01_07g1512	67.8067	177.953	--
	GrapeSMv01_06g0812	33.7	4.60333	At5g58730
	GrapeSMv01_15g0234	23.3033	97	At1g04770
	GrapeSMv01_03g0768	81.7967	16.5333	RHY1A
	GrapeSMv01_02g0680	99.62	21.4267	AAE3
	GrapeSMv01_06g0588	88.78	224.197	SAG113
	GrapeSMv01_06g0794	31.75	94.6567	UGT71K1
	GrapeSMv01_07g0520	15.1733	1.75	--
	GrapeSMv01_18g1691	26.5733	85.14	OHP2
	GrapeSMv01_08g0409	6.51	34.2467	mcfF
	GrapeSMv01_03g1335	29.49	64.88	ABC1K3
	GrapeSMv01_10g0018	2.48333	22.1633	GA2OX8
	GrapeSMv01_14g0513	92.9933	16.3533	--
	GrapeSMv01_04g1681	13.21	35.04	PERK12
	GrapeSMv01_16g0067	65.8667	6.95667	PAL
	GrapeSMv01_08g0265	55.7633	10.5233	FLA17
	GrapeSMv01_12g0762	304.973	59.8067	At5g35735
	GrapeSMv01_02g0116	8.66	47.7133	DLO2
	GrapeSMv01_05g1028	16.72	56.0333	BAM1
	GrapeSMv01_08g1842	20.09	2.94	PICBP
	GrapeSMv01_14g1085	0.953333	25.7933	FTSH6
	GrapeSMv01_13g1672	102.137	215.287	CCD1
	GrapeSMv01_05g0941	57.3	116.51	RNP1
	GrapeSMv01_09g1137	34.53	6.75333	At1g79710
	GrapeSMv01_04g0830	253	41.46	AAE12
	GrapeSMv01_05g1128	133.547	21.7867	CHS2
	GrapeSMv01_12g0624	60.6467	155.6	spg1
	GrapeSMv01_Sca0052	81.8833	17.84	RHM1
	GrapeSMv01_06g1283	28.19	91.68	--
	GrapeSMv01_08g1448	60.5467	8.29	METK3
	GrapeSMv01_06g0357	180.313	43.65	MPK3
	GrapeSMv01_06g0396	60.79	140.377	GSTL3
	GrapeSMv01_13g0359	5.37	26.74	ACT1
	GrapeSMv01_13g0133	13.2033	47.2767	DREB2C
	GrapeSMv01_01g0511	13.1867	41.2433	PIN3
	GrapeSMv01_10g0938	24.23	61.7133	SS4
	GrapeSMv01_05g0437	34.7033	8.1	SRC2
	GrapeSMv01_05g1568	39.45	6.14333	ACD6
	GrapeSMv01_17g0612	28.8933	60.6333	At1g18900
	GrapeSMv01_16g1077	318.157	97.6033	SGT1
	GrapeSMv01_16g0938	88.3	210.703	CYB561A
	GrapeSMv01_12g0390	35.47	79.3533	TPC1A
	GrapeSMv01_14g1314	247.33	570.977	AVP1
	GrapeSMv01_02g0734	8.2	37.17	PURU2
	GrapeSMv01_14g1951	426.503	147.753	UBI11
	GrapeSMv01_14g1167	16.6267	50.0867	--
	GrapeSMv01_11g0959	83.7433	11.2533	CYP73A12
	GrapeSMv01_18g1031	55.3467	122.807	CYP82A3
	GrapeSMv01_15g0646	11.5733	40.62	CYP76T24
	GrapeSMv01_02g0074	149.707	367.007	PIP1-3
	GrapeSMv01_07g0302	26.8733	89.8033	DTX27
	GrapeSMv01_08g1656	27.45	72.67	NAC047
	GrapeSMv01_18g1223	155.383	36.3167	At4g24160
	GrapeSMv01_01g1716	26.3033	68.72	NPF6.1
	GrapeSMv01_02g0056	173.32	350.063	GSH1
	GrapeSMv01_11g0754	124.85	268.197	--
	GrapeSMv01_05g0612	27.95	3.95333	ACL5
	GrapeSMv01_04g1212	22.5433	63.95	LPPE2
	GrapeSMv01_16g0020	28.9967	72.8133	--
	GrapeSMv01_03g0859	36.1867	112.373	--
	GrapeSMv01_15g0744	40.2967	5.61333	CYP87A3
	GrapeSMv01_02g0571	108.34	216.757	PGRL1A
	GrapeSMv01_15g0897	10.0167	52.2767	ARF11
	GrapeSMv01_16g1381	148.103	38.5167	BIP4
	GrapeSMv01_01g0426	94	214.113	--
	GrapeSMv01_05g0407	3.9	24.1467	HYH
	GrapeSMv01_04g1298	19.4367	92.7333	ALDP
	GrapeSMv01_09g1320	39.82	86.7233	PHL6
	GrapeSMv01_15g1135	42.0267	84.9	AHL11
	GrapeSMv01_17g0541	22.39	54.7733	--
	GrapeSMv01_18g0516	62.7867	6.47	EXL2
	GrapeSMv01_08g0738	35.8633	87.0633	DUSP12
	GrapeSMv01_04g0673	84.2233	17.2967	At5g10770
	GrapeSMv01_17g0814	20.19	59.2267	CLPB1
	GrapeSMv01_14g0872	95.4533	16.0533	SNL6
	GrapeSMv01_15g0984	11.7667	36.78	SPA1
	GrapeSMv01_04g0238	17.9	73.7767	--
	GrapeSMv01_09g0387	187.253	426.463	dlc-1
	GrapeSMv01_13g0702	60.4567	8.88	--
	GrapeSMv01_13g1331	24.5067	59.5933	CYP734A2
	GrapeSMv01_11g0846	22.1367	76.6733	HSP70
	GrapeSMv01_11g1283	0.593333	16.85	F3GT2
	GrapeSMv01_11g1292	17.69	1.03333	Os07g0190000
	GrapeSMv01_17g0884	27.1933	74.6333	UGT74B1
	GrapeSMv01_12g0506	799.74	260.2	HPL
	MSTRG.3957	23.06	1.68333	--
	GrapeSMv01_01g1646	96.2667	25.0933	PBS1
	GrapeSMv01_12g0070	83.2167	169.057	HPD
	GrapeSMv01_08g1033	37.9067	80.0267	LHW
	GrapeSMv01_19g0194	4.19333	13.8	CIP7
	GrapeSMv01_04g0340	5.45667	17.44	EMF1
	GrapeSMv01_19g1007	163.197	32.7667	GA2OX1
	GrapeSMv01_05g0341	26.4933	79.4633	At3g62260
	GrapeSMv01_07g0203	70.33	178.66	FLZ6
	GrapeSMv01_09g1013	218.88	65.0767	Os04g0609600
	GrapeSMv01_04g1191	51.7267	13.7567	PUB5
	GrapeSMv01_10g1105	69.1033	253.987	PSAK
	GrapeSMv01_16g0877	17.8967	47.21	XBAT33
	GrapeSMv01_19g0480	152.05	42.6633	RHM1
	GrapeSMv01_12g0340	4.43	21.4433	GLK1
	GrapeSMv01_10g1299	59.61	132.913	At1g56130
	GrapeSMv01_01g1133	38.0433	113.1	NAP2
	GrapeSMv01_05g1743	144.19	24.66	UGT75L6
	GrapeSMv01_01g0362	45.7	1.74	--
	GrapeSMv01_15g0032	32.2867	83.7633	SIGB
	GrapeSMv01_16g0857	15.2733	42.88	At4g00755
	GrapeSMv01_11g0785	66.5933	154.197	TIL
	GrapeSMv01_06g0909	153.873	50.18	EXO70B1
	GrapeSMv01_08g0818	71.6267	144.56	MBR2
	GrapeSMv01_18g1304	48.5167	103.213	PETH
	GrapeSMv01_04g0621	115.663	18.46	CM2
	GrapeSMv01_04g0159	18.1333	49.21	MSL10
	GrapeSMv01_18g0008	35.66	5.35667	CESA5
	GrapeSMv01_14g1189	137.117	306.05	RH3
	GrapeSMv01_16g1350	35.7733	107.003	ATHB-12
	MSTRG.4325	75.2967	9.76	--
	GrapeSMv01_13g1336	61.5	9.89333	CXE6
	GrapeSMv01_06g0119	33.81	83.7167	PAP12
	GrapeSMv01_17g0649	326.45	101.923	ABCA2
	GrapeSMv01_07g0506	126.357	36.0933	ACA2
	GrapeSMv01_11g0676	8.59333	29.91	STP7
	GrapeSMv01_07g0707	100.487	29.0167	PAT
	GrapeSMv01_04g1667	93.65	254.57	PSAN
	GrapeSMv01_01g0242	38.1333	85.7967	HCF136
	GrapeSMv01_13g0312	24.0267	62.0067	--
	GrapeSMv01_01g1360	146.877	48.6967	--
	GrapeSMv01_19g0072	4.38333	21.6233	At4g27290
	GrapeSMv01_13g0244	34.78	82.7567	--
	GrapeSMv01_09g0154	32.02	7.99667	ALA7
	GrapeSMv01_14g1072	5.40333	34.5233	--
	GrapeSMv01_02g0808	21.33	48.7933	GATA26
	GrapeSMv01_19g0997	6.21667	44.6867	PARC
	GrapeSMv01_08g0417	5.62667	22.6233	DTX44
	GrapeSMv01_12g0500	9.67333	37.74	CSLH1
	GrapeSMv01_18g2228	20.8333	2	N
	GrapeSMv01_14g0691	54.6467	123.6	Y-2
	GrapeSMv01_04g0045	33.85	72.2433	SIGC
	GrapeSMv01_01g0959	36.14	4.96667	JGB
	GrapeSMv01_03g0123	19.6267	50.54	At1g50180
	GrapeSMv01_14g1618	4.01	19.5133	--
	GrapeSMv01_04g1411	23.7767	67.8867	STR15
	GrapeSMv01_17g0835	24.7133	2.32333	EDS1
	GrapeSMv01_01g1231	13.7067	34.6433	PI4KG7
	GrapeSMv01_15g0896	10.3567	56.15	ARF9
	GrapeSMv01_09g0512	15.79	0.926667	PDR1
	GrapeSMv01_11g0469	23.6833	51.7933	--
	GrapeSMv01_15g1156	427.463	105.217	At3g61260
	GrapeSMv01_19g0744	26.34	78.89	--
	GrapeSMv01_07g1852	33.1333	3.06	PANC
	GrapeSMv01_10g0730	38.8533	6.26333	GLR2.7
	GrapeSMv01_14g1788	69.3367	164.627	psbW
	GrapeSMv01_01g0808	169.367	55.4767	ACLA-1
	GrapeSMv01_18g0936	55.19	111.553	WEB1
	GrapeSMv01_10g0121	87.8633	181.33	ATPC
	GrapeSMv01_05g0524	30.5367	87.57	PPD
	GrapeSMv01_18g0562	223.287	53.3633	STR6
	GrapeSMv01_07g0280	19.7467	48.35	SAPK2
	GrapeSMv01_01g0896	22.5	0.736667	XTH33
	GrapeSMv01_14g1174	94.2833	30.2233	GAUT13
	GrapeSMv01_06g0821	49.63	11.7733	PLC4
	GrapeSMv01_14g1264	28.78	80.4967	ABCI20
	GrapeSMv01_05g0181	29.36	89.47	GA2OX2
	GrapeSMv01_12g0535	31.49	6.03333	--
	GrapeSMv01_13g1402	44.0467	9.07333	RDN2
	GrapeSMv01_18g0771	47.3333	11.46	--
	GrapeSMv01_18g0820	63.0533	17.6233	At4g33920
	GrapeSMv01_06g0770	15.28	42.1167	FTSH9
	GrapeSMv01_02g0754	3.27667	24.0433	ERF039
	GrapeSMv01_08g0384	17.0067	70	--
	GrapeSMv01_01g1015	20.89	65.1533	HOX16
	GrapeSMv01_18g1958	21.3633	1.39	--
	GrapeSMv01_Sca0188	11.83	33.0333	FBPban1
	GrapeSMv01_07g0097	31.8467	65.0533	IP5P12
	GrapeSMv01_01g1339	73.9967	18.86	VIT_01s0010g01180
	GrapeSMv01_04g0567	24.8467	1.27667	ERF003
	MSTRG.15237	10.42	32.32	--
	GrapeSMv01_09g0708	94.2333	197.713	AVP1
	GrapeSMv01_01g0145	60.65	15.9433	RAN1
	GrapeSMv01_01g0274	71.51	17.8733	ALA9
	GrapeSMv01_19g0007	17.3033	40.5867	ATG18F
	GrapeSMv01_14g0511	179.79	38.8067	FER
	GrapeSMv01_13g1678	6.88333	36.5467	RBCX2
	GrapeSMv01_17g0615	20.5833	41.2733	AHA11
	GrapeSMv01_03g0222	16.3167	43.6033	--
	GrapeSMv01_08g0869	119.397	37.49	ITN1
	GrapeSMv01_07g0845	211.103	67.8267	PAD4
	GrapeSMv01_13g0602	9.61667	26.3767	CG4743
	MSTRG.5935	16.27	1	NPF5.5
	GrapeSMv01_15g0371	118.3	290.417	FLZ3
	GrapeSMv01_05g1709	126.513	39.17	At4g24290
	GrapeSMv01_06g0641	36.2667	82.51	PHS2
	GrapeSMv01_01g0635	82.2567	23.97	OBE3
	GrapeSMv01_01g1136	22.7933	76.3467	--
	GrapeSMv01_13g0087	52.7533	129.03	--
	GrapeSMv01_06g0567	21.3033	60.2433	PTAC16
	GrapeSMv01_09g0377	17.1533	43.3933	AAE13
	GrapeSMv01_10g1234	48.4567	9.13	MUR4
	GrapeSMv01_11g0254	41.53	5.35667	--
	GrapeSMv01_14g0911	29.15	82.13	POT8
	GrapeSMv01_07g0956	25.5333	56.7467	CLC-C
	GrapeSMv01_13g0144	8.98	37.0733	RER6
	GrapeSMv01_08g0330	13.4233	33.3	FAD7
	GrapeSMv01_05g0223	337.917	100.833	METK2
	GrapeSMv01_09g0319	12.6133	43.4767	At3g21360
	MSTRG.9841	8.91	1.77333	RE2
	GrapeSMv01_12g0143	30.0133	66.76	CAJ1
	GrapeSMv01_01g1543	16.76	54.6467	At1g67480
	GrapeSMv01_07g0262	45.73	100.21	UGT85K5
	GrapeSMv01_04g1202	51.2833	111.867	RER1B
	MSTRG.8592	4.21333	14.43	MEBL
	GrapeSMv01_14g1089	21.3133	0.97	AVT1I
	GrapeSMv01_07g0777	89.3	11.8233	WRKY51
	GrapeSMv01_18g0903	27.1733	58.0233	NAC072
	GrapeSMv01_01g0329	9.65667	33.0133	HHO2
	GrapeSMv01_19g0022	18.4833	3.09667	FH5
	GrapeSMv01_08g0703	5.61333	20.3633	NPF3.1
	GrapeSMv01_06g1463	67.87	170.09	--
	GrapeSMv01_19g0202	3.61333	13.29	CIP7
	GrapeSMv01_19g0643	68.6833	220.363	--
	GrapeSMv01_06g0825	31.2033	67.2433	SMXL6
	GrapeSMv01_10g0485	39.9433	10.41	B120
	GrapeSMv01_18g2367	31.89	4.34667	At1g07160
	GrapeSMv01_11g0855	35.9667	4.39667	SHT
	GrapeSMv01_14g1472	35.7833	5.1	LOX1.5
	GrapeSMv01_18g1004	33.3533	77.9633	At1g47710
	GrapeSMv01_05g0231	20.29	50.7967	PDK
	GrapeSMv01_09g0139	4.57667	16.7033	SLC25A44
	GrapeSMv01_04g1200	7.96	32.7567	PPH
	GrapeSMv01_12g1552	6.97667	19.33	FRO7
	GrapeSMv01_11g0188	13.4	34.2267	LUT2
	GrapeSMv01_11g0050	824.59	279.55	TIFY10A
	GrapeSMv01_10g0717	71.4367	13.9567	PTI5
	GrapeSMv01_02g0253	30.8567	6.29667	PI4KG4
	GrapeSMv01_18g0520	46.71	11.5467	At1g78280
	GrapeSMv01_01g0568	5.55667	23.86	PCR2
	GrapeSMv01_01g0260	434.213	138.207	--
	GrapeSMv01_06g1006	32.8667	5.15	At1g09575
	GrapeSMv01_01g0366	25.32	70.1133	ERF118
	GrapeSMv01_19g0905	8.62333	27.4633	--
	GrapeSMv01_14g1123	54.2233	112.72	RCF3
	GrapeSMv01_16g0103	19.27	63.32	At1g64890
	GrapeSMv01_06g0161	25.6867	2.79	UGT92A1
	GrapeSMv01_16g1195	21.9567	72.9	PP2C51
	GrapeSMv01_18g0379	27.7433	4.14	B3GALT7
	GrapeSMv01_11g0205	26.32	2.30667	BHLH41
	GrapeSMv01_14g1698	12.9733	31.71	At1g54570
	GrapeSMv01_10g0939	211.363	557.023	CAB40
	GrapeSMv01_13g0356	42.15	6.35	GLC1
	GrapeSMv01_16g1033	54.5867	113.223	CA2
	GrapeSMv01_02g0484	45.43	100.12	SAUR36
	GrapeSMv01_02g0482	27.5167	61.2133	TL20.3
	GrapeSMv01_19g0902	22.3733	50.03	UKL4
	GrapeSMv01_03g0291	157.193	6.16667	EXLA2
	GrapeSMv01_16g0071	184.563	9.78667	PAL
	GrapeSMv01_14g1904	106.877	21.2233	PPCK1
	GrapeSMv01_18g0227	32.47	103.8	CML44
	GrapeSMv01_16g1308	273.203	89.43	NAC014
	GrapeSMv01_19g1139	19.44	212.83	NAC021
	GrapeSMv01_07g0509	16.7967	0.533333	BT4
	GrapeSMv01_02g0264	16.95	38.6767	--
	GrapeSMv01_18g2168	24.34	5.25333	RPV1
	GrapeSMv01_04g1655	10.62	27.4333	SEU
	GrapeSMv01_17g0544	62.79	8.69667	DIR23
	GrapeSMv01_19g1128	106.847	235.19	At1g17220
	GrapeSMv01_05g0376	19.6433	52.6467	PDK
	GrapeSMv01_18g1239	72.2767	165.317	CYP83B1
	GrapeSMv01_01g0482	9.35	35.4533	--
	GrapeSMv01_03g0699	85.46	22.5833	UNC13A
	GrapeSMv01_06g0489	210.617	62.3267	HSP70
	GrapeSMv01_04g1334	72.4667	209.81	ATJ11
	GrapeSMv01_04g1073	100.217	201.417	Os01g0913000
	GrapeSMv01_04g1483	461.447	119.81	MO2
	GrapeSMv01_01g0424	19.16	43.2467	--
	GrapeSMv01_01g0975	15.6367	43.9167	KUA1
	GrapeSMv01_07g1903	59.4367	123.557	PRT1
	GrapeSMv01_10g0687	43.7067	4.87667	E6
	GrapeSMv01_13g0367	37.5167	2.25	--
	GrapeSMv01_01g1249	10.8367	28.4367	WIT2
	GrapeSMv01_18g0519	260.447	86.4933	DHAPS-1
	GrapeSMv01_11g0414	30.0233	4.36667	LRX4
	GrapeSMv01_18g0954	10.5267	34.3767	--
	GrapeSMv01_05g1744	148.737	29.5367	UGT75L6
	GrapeSMv01_13g0352	170.333	49.2567	--
	GrapeSMv01_14g1237	504.623	194.637	METK4
	GrapeSMv01_18g1022	79.0033	168.45	CYP82A3
	GrapeSMv01_08g1517	51.4533	12.9567	ACA4
	GrapeSMv01_06g0799	28.04	2.10667	CYP71E7
	GrapeSMv01_05g0289	175.527	46.91	SRC2
	GrapeSMv01_19g0844	19.5267	51.3633	THO3
	GrapeSMv01_12g1128	32.19	81.35	GT6
	GrapeSMv01_17g1056	21.7633	70.34	CYP736A117
	GrapeSMv01_04g0270	19.1533	47.3833	At4g31240
	GrapeSMv01_11g0629	111.507	37.2667	PAT24
	GrapeSMv01_13g0151	154.03	32.5967	WUN1
	GrapeSMv01_19g0495	16.94	3.14667	FH5
	GrapeSMv01_10g0691	29.0433	64.8033	Dnajb13
	GrapeSMv01_16g0132	54.3967	13.4333	SYP21
	GrapeSMv01_10g0027	1.67333	11.65	At4g21170
	GrapeSMv01_15g0834	48.05	162.643	SAUR32
	GrapeSMv01_17g0490	18.8433	42.6667	ALA9
	GrapeSMv01_14g1997	58.0467	14.16	PCS1
	GrapeSMv01_07g1398	6.18333	23.9667	GATL7
	GrapeSMv01_10g0351	21.0067	47.12	NAR1
	GrapeSMv01_02g1356	22.57	62.33	CCD4
	GrapeSMv01_03g0390	9.51333	24.96	CLC-E
	GrapeSMv01_06g0563	65.5267	135.64	gtf2a1
	GrapeSMv01_16g1412	15.6367	1.13667	PME34
	GrapeSMv01_13g0617	122.81	37.6033	gtf2f2
	GrapeSMv01_14g0843	6.07	27.46	NRT2.5
	GrapeSMv01_07g1839	45.85	9.54	PED1
	GrapeSMv01_08g0945	157.457	55.2333	AGD7
	GrapeSMv01_08g0354	34.02	76.21	RANBP1B
	GrapeSMv01_16g0088	65.2833	135.263	CYP89A9
	GrapeSMv01_09g0264	14.1133	1.04667	At2g19230
	GrapeSMv01_12g1477	17.3267	36.3433	--
	GrapeSMv01_17g1069	11.1	31.2767	CYP71AP13
	GrapeSMv01_01g0640	33.67	6.95	ALKBH10B
	GrapeSMv01_13g0250	24.8233	3.95667	At5g59700
	GrapeSMv01_19g0237	56.2333	15.68	--
	GrapeSMv01_01g0398	37.6433	5.83667	--
	GrapeSMv01_13g0504	13.3733	65.9433	HSP18.2
	GrapeSMv01_Sca0153	29.6833	0.733333	DREB1D
	GrapeSMv01_08g0792	12.1167	27.22	ARF18
	GrapeSMv01_19g0597	142.87	52.6667	CPK19
	GrapeSMv01_18g0246	32.99	1.24667	At1g11050
	GrapeSMv01_05g0259	4.65333	24.3233	HYH
	GrapeSMv01_04g1443	5.36667	40.71	SSL5
	GrapeSMv01_03g0045	19.2	44.3633	BBX19
	GrapeSMv01_18g0682	21.3	2.43667	--
	GrapeSMv01_17g0539	31.8267	4.31333	--
	GrapeSMv01_17g0360	76.3733	18.47	B120
	GrapeSMv01_14g0528	110.457	35.6033	FER
	GrapeSMv01_05g0246	48.9467	8.49333	DGAT3
	GrapeSMv01_18g0229	32.4467	72.3967	ndhM
	GrapeSMv01_16g1043	14.1733	37.3	RVE6
	GrapeSMv01_10g0702	81.9533	19.54	MLO12
	GrapeSMv01_14g1714	16.8133	50.38	OASA1
	GrapeSMv01_02g1070	43.77	10.3433	CSLD2
	GrapeSMv01_19g0711	31.8767	9.31333	--
	GrapeSMv01_03g0266	37.3233	3.32333	LYM2
	GrapeSMv01_07g2008	19.0633	0.516667	RPV1
	GrapeSMv01_09g0641	30.9	70.8	--
	GrapeSMv01_18g1647	13.5467	39.6133	--
	GrapeSMv01_04g0964	17.6467	40.1167	VDE1
	GrapeSMv01_05g0100	1.96667	10.5433	BXL1
	GrapeSMv01_18g0633	41.96	9.28667	HVA22A
	GrapeSMv01_07g1314	31.8133	64.5867	TOC159
	GrapeSMv01_02g0270	15.69	48.4467	ndhS
	GrapeSMv01_03g1060	31.34	68.6167	GATA24
	GrapeSMv01_09g0801	23.7333	54.5567	FBL14
	GrapeSMv01_06g1342	6.18667	23.2567	--
	GrapeSMv01_18g0533	22.2367	2.62	qtrt1
	GrapeSMv01_18g1228	477.073	956.483	HTR4
	GrapeSMv01_16g0070	18.11	1.47	PAL
	GrapeSMv01_17g0444	8.62	30.1833	CCR4-3
	GrapeSMv01_09g0232	7.83	18.6167	SELMODRAFT_444075
	GrapeSMv01_09g1318	14.91	39.54	--
	GrapeSMv01_18g0101	7.54333	23.0767	CRP1
	GrapeSMv01_17g0034	51.5167	14.85	BON1
	GrapeSMv01_18g2225	10.9933	1.31333	RUN1
	GrapeSMv01_06g0655	61.3067	125.537	THIC
	GrapeSMv01_06g1410	4.21	21.56	ZAT5
	GrapeSMv01_03g0961	162.28	43.31	RLK7
	GrapeSMv01_11g0831	260.283	96.8533	Gtp-bp
	GrapeSMv01_04g0537	17.67	35.4067	--
	GrapeSMv01_18g0291	4.53667	31.7633	CAO
	GrapeSMv01_16g0069	88.4433	3.59667	PAL
	GrapeSMv01_05g0004	59.5	10.1067	--
	GrapeSMv01_06g1511	18.44	1.13667	CYP94C1
	GrapeSMv01_01g0629	119.573	26.9167	PUB21
	GrapeSMv01_13g0501	5.81	48.12	HSP18.2
	GrapeSMv01_04g1707	41.0667	91.58	PILS1
	GrapeSMv01_14g0007	19.6867	43.03	TCP20
	GrapeSMv01_05g0479	53.7167	128.987	VIT_05s0020g01830
	GrapeSMv01_04g0160	19.3767	83.7233	--
	GrapeSMv01_08g1098	10.9967	36.57	At3g10130
	GrapeSMv01_12g0648	66.2333	179.91	MIP1A
	GrapeSMv01_13g0509	6.92667	47.85	HSP18.2
	GrapeSMv01_11g1286	2.86	14.9133	F3GT2
	GrapeSMv01_15g0621	9.92	29.1833	TCP9
	GrapeSMv01_Sca0143	7.24333	20.7667	NHX2
	GrapeSMv01_09g0417	59.83	12.9433	--
	GrapeSMv01_06g1376	68.76	17.9133	HIPP03
	GrapeSMv01_13g1815	80.2633	19.0867	--
	GrapeSMv01_01g0583	64.6333	140.407	At1g06650
	GrapeSMv01_12g0059	37.5867	96.5567	--
	GrapeSMv01_07g0696	23.45	46.97	--
	GrapeSMv01_01g0625	18.72	3.17667	At1g34300
	GrapeSMv01_18g0295	21.6733	56.52	--
	GrapeSMv01_18g0116	15.8433	39.7433	--
	GrapeSMv01_09g1004	74.97	17.72	--
	GrapeSMv01_13g0062	57.74	11.8633	CCR3
	GrapeSMv01_02g0970	20.3067	43.8333	PKP3
	GrapeSMv01_13g1546	77.91	20.9	ERD15
	GrapeSMv01_08g1346	29.1133	62.9533	PRXIIE
	GrapeSMv01_06g0095	64.3933	5.12333	DIR19
	GrapeSMv01_06g1427	4.20667	16.43	SCPL51
	GrapeSMv01_05g0688	23.13	57.7533	CLH2
	GrapeSMv01_19g1378	196.82	49.2133	AMC4
	GrapeSMv01_05g1686	132.157	29.1433	--
	GrapeSMv01_05g0383	7.79667	23.3	CRSH
	GrapeSMv01_19g0625	27.6433	1.89667	MAPKKK18
	GrapeSMv01_Sca0131	13.9767	72.2167	FBA1
	GrapeSMv01_05g1213	1.04667	10.2867	ACD6
	GrapeSMv01_18g0475	24.27	2.08667	PHI-1
	GrapeSMv01_Sca0305	7.59667	22.43	--
	GrapeSMv01_03g1080	22.8867	1.8	-
	GrapeSMv01_05g0615	38.9133	8.70333	LECRK4
	GrapeSMv01_06g0448	5.78667	22.4033	MYBAS2
	GrapeSMv01_03g0344	210.033	65.3833	PIX13
	GrapeSMv01_13g0116	17.4733	43.7367	--
	GrapeSMv01_12g1326	43.3067	443.143	SEND33
	GrapeSMv01_18g2393	8.97	0.906667	RPV1
	GrapeSMv01_03g0620	71.45	17.5833	--
	GrapeSMv01_01g1690	3.27667	22.82	--
	GrapeSMv01_06g0756	28.36	66.87	PHS2
	MSTRG.21840	14.4133	2.03667	--
	GrapeSMv01_16g0842	28.2767	1.26333	DREB1D
	GrapeSMv01_04g0874	27.92	4.71	--
	GrapeSMv01_14g1128	8.49	55.5933	--
	GrapeSMv01_02g0903	62.76	15.2933	PRS1
	MSTRG.18631	24.77	3.53333	LRK10
	GrapeSMv01_01g1003	94.66	27.8567	--
	GrapeSMv01_06g1370	42.12	11.3767	EVN
	GrapeSMv01_08g1322	66.1967	133	SBEI
	GrapeSMv01_01g1753	39.6	9.51667	FES1
	GrapeSMv01_07g0538	75.5533	156.587	KAI2
	GrapeSMv01_14g0944	53.3233	110.483	FTRC
	GrapeSMv01_11g0089	23.1767	55	--
	GrapeSMv01_11g0720	59.9767	133.827	TIL
	GrapeSMv01_14g0506	66.2533	17.25	COB
	GrapeSMv01_07g0881	2.29	11.0967	--
	GrapeSMv01_08g0118	11.06	23.7433	At3g03770
	GrapeSMv01_14g1346	28.2333	4.85	At1g09160
	GrapeSMv01_14g1622	5.16667	22.3467	--
	GrapeSMv01_16g1359	29.38	4.15333	At2g46620
	GrapeSMv01_07g2120	32.8733	8.66	At5g48380
	GrapeSMv01_12g0508	35.7233	4.60667	yuiD
	GrapeSMv01_17g1051	21.14	1.55667	Os07g0688000
	GrapeSMv01_10g0741	29.85	4.74667	NUDT15
	GrapeSMv01_08g0849	36.43	76.7733	--
	GrapeSMv01_11g0080	32.9133	3.08333	CYP92C6
	GrapeSMv01_03g1098	93.7533	22.11	WAKL2
	GrapeSMv01_18g0705	18.1433	3.84333	CSLC12
	GrapeSMv01_14g1851	50.21	106.44	AHL14
	GrapeSMv01_03g0313	563.52	144.16	AATL1
	MSTRG.16479	11.4967	1.04	SAG101
	GrapeSMv01_01g1567	83.0033	173.97	At1g67360
	GrapeSMv01_18g0089	47.8033	7.15333	PIX13
	GrapeSMv01_19g0661	26.6867	61.3367	--
	GrapeSMv01_13g0083	62.8633	13.07	At2g30020
	GrapeSMv01_11g1170	43.93	95.34	DBR
	GrapeSMv01_12g0239	110.943	37.32	At2g42690
	GrapeSMv01_13g0849	80.2033	25.7267	PSI3
	GrapeSMv01_03g0026	11.5133	28.4533	DTX46
	GrapeSMv01_11g0238	4.84333	19.27	--
	GrapeSMv01_10g0637	9.36333	27.5067	At5g22620
	GrapeSMv01_13g1688	27.3033	6.65667	CESA3
	GrapeSMv01_10g0449	37.5633	7.19667	TPS13
	GrapeSMv01_11g0603	68.2567	143.007	CLC-G
	GrapeSMv01_04g0246	1.00667	9.14667	CRYD
	GrapeSMv01_01g1095	23.8167	3.55	At1g26850
	GrapeSMv01_13g0624	72.5233	14.0133	MLO6
	GrapeSMv01_15g0585	15.09	30.5533	KINUB
	GrapeSMv01_05g0081	46.1167	12.28	COBL7
	GrapeSMv01_14g0310	17.2233	37.82	LRK10L-1.3
	GrapeSMv01_11g0555	103.667	22.04	--
	GrapeSMv01_16g0950	35.4233	8.15	-
	GrapeSMv01_06g1056	77.1267	25.0633	SSL3
	GrapeSMv01_05g0776	50.2133	103.127	CSLG2
	GrapeSMv01_01g1071	28.04	63.7233	--
	GrapeSMv01_08g1404	57.13	13.4967	UGT73D1
	GrapeSMv01_14g1000	5.29333	13.37	VIP2
	GrapeSMv01_11g0281	348.587	127.47	PFK3
	GrapeSMv01_06g0337	6.28667	19.5267	--
	GrapeSMv01_06g0673	22.26	50.3067	PTAC16
	GrapeSMv01_18g0158	5.08333	21.3967	HMGB9
	GrapeSMv01_08g1737	11.8633	24.7833	KIN7L
	GrapeSMv01_06g0385	14.5433	30.85	RAP2-7
	GrapeSMv01_14g0269	24.08	3.04	UGT89A2
	GrapeSMv01_08g1128	85.3433	20.7133	DCR
	GrapeSMv01_05g0925	33.2533	1.83333	PMP22
	GrapeSMv01_03g0212	7.60667	22.32	AK1
	GrapeSMv01_04g0283	50.2	12.3233	NAGK
	GrapeSMv01_02g0929	34.61	5.69667	PUP11
	GrapeSMv01_10g0327	82.4733	169.96	HIPP07
	GrapeSMv01_12g0818	26.2033	69.3167	--
	GrapeSMv01_14g1720	30.5267	68.6133	rd2
	GrapeSMv01_08g0781	323.813	112.257	PAL
	GrapeSMv01_10g0660	21.24	45.76	SMG7L
	GrapeSMv01_04g0634	10.2467	22.83	PGR3
	GrapeSMv01_04g0668	19.3933	0.463333	At5g10770
	GrapeSMv01_14g0647	15.0467	40.6967	At5g13200
	GrapeSMv01_07g0281	9.9	24.25	GCL1
	GrapeSMv01_07g0671	115.863	40.6033	HSF24
	GrapeSMv01_02g0791	67.1	15.9	--
	GrapeSMv01_11g0400	200.173	52.63	AGP41
	GrapeSMv01_18g1073	25.9133	57.8667	GGPS
	GrapeSMv01_08g1107	62.7667	15.9233	At3g11320
	GrapeSMv01_18g1780	13.5567	32.8333	ERF1-3
	GrapeSMv01_06g0522	8.51	0.746667	IDN2
	GrapeSMv01_18g1170	22.3267	3.17667	CYCT1-1
	GrapeSMv01_03g0011	39.1933	8.14333	PAP
	GrapeSMv01_02g0907	12.4	26.3567	APRR2
	GrapeSMv01_16g1154	24.8833	5.55667	SEN1
	GrapeSMv01_05g1493	24.1767	2.94	CML3
	GrapeSMv01_16g1166	436.363	179.48	UBC28
	GrapeSMv01_15g1190	29.9433	0.64	PIK-1
	GrapeSMv01_15g0900	76.8467	26.3267	MTB1
	GrapeSMv01_17g0703	25.45	5.09667	--
	GrapeSMv01_02g0198	240.943	85.2467	BIP4
	GrapeSMv01_04g0465	4.75667	14.5933	LE
	GrapeSMv01_13g0850	13.02	28.9067	--
	GrapeSMv01_18g0281	28.8167	5.94667	ILL6
	GrapeSMv01_04g0667	20.21	0.34	-
	GrapeSMv01_11g0237	34.6567	5.54333	CDA1
	GrapeSMv01_08g1401	10.99	29.6033	NCS1
	GrapeSMv01_13g1330	4.54667	12.79	RGA3
	GrapeSMv01_18g0676	16.9067	41.7367	AAP6
	GrapeSMv01_09g0360	115.607	30.0367	TIP2-1
	GrapeSMv01_08g0408	5.94333	30.6	PFE2
	GrapeSMv01_15g1045	398.973	160.863	At5g24010
	GrapeSMv01_03g1008	4.90333	15.4233	CYP714C2
	GrapeSMv01_11g0497	9.46	33.0767	--
	GrapeSMv01_05g0137	16.5833	34.3967	SIS8
	GrapeSMv01_17g0792	15.3367	31.9567	UGT83A1
	GrapeSMv01_10g0273	40.1767	2.67	--
	GrapeSMv01_11g1242	212.507	83.67	4CL2
	GrapeSMv01_01g1725	45.96	14.34	PUB8
	GrapeSMv01_15g0580	1.54333	22.0233	--
	GrapeSMv01_11g1256	29.7833	0.743333	XTH23
	GrapeSMv01_03g0536	92.26	30.7067	XLG1
	GrapeSMv01_18g0109	20.24	48.3367	CYP87A3
	GrapeSMv01_08g0345	33.0633	66.32	AMPD
	GrapeSMv01_14g0795	12.7933	31.94	--
	GrapeSMv01_03g1099	68.7967	12.5533	WAK2
	GrapeSMv01_04g1301	6.00667	35.9733	BBX19
	GrapeSMv01_19g0607	17.4067	1.02	GGPS
	GrapeSMv01_01g0772	5.34	17.9767	DTX29
	GrapeSMv01_10g0060	11.9433	1.82333	JMJ25
	GrapeSMv01_17g0890	37.7267	86.99	--
	GrapeSMv01_06g0724	26.24	5.04667	--
	GrapeSMv01_07g0712	39.8	6.44667	AAO
	GrapeSMv01_14g1435	14.5067	32.5433	MGP
	GrapeSMv01_07g0294	42.6733	12.8033	ATL55
	GrapeSMv01_14g0630	6.83	18.8267	SCRM
	GrapeSMv01_19g1332	21.5333	6.32	SIS8
	GrapeSMv01_12g0336	34.64	10.6833	HSL1
	GrapeSMv01_14g0827	19.1133	38.7033	MKK3
	GrapeSMv01_12g1450	20.64	46.54	--
	GrapeSMv01_19g0996	10.1	24.8367	CYP72A225
	GrapeSMv01_07g0663	35.68	8.24333	--
	GrapeSMv01_04g0975	6.07333	16.1767	PP2B1
	GrapeSMv01_07g0306	34.82	4.72	OVCA2
	GrapeSMv01_09g0530	214.637	80.8	AATP1
	GrapeSMv01_17g0716	0.203333	3.90333	--
	GrapeSMv01_10g1208	45.91	12.4633	--
	GrapeSMv01_03g0892	29.1933	5.39	SCPL18
	GrapeSMv01_12g0874	5.30667	15.24	AKT2
	GrapeSMv01_18g0427	15.7133	2.26667	gpmA
	GrapeSMv01_09g0635	34.9067	90.2833	--
	GrapeSMv01_13g0476	17.0033	1.31	SBT4.3
	GrapeSMv01_16g0108	31.06	5.37667	HSR201
	GrapeSMv01_Sca0388	0.946667	13.49	--
	GrapeSMv01_14g1129	56.14	8.79667	--
	GrapeSMv01_13g1677	27.1933	7.46333	CESA3
	GrapeSMv01_11g0327	39.6833	12.3	PATROL1
	GrapeSMv01_13g0213	21.93	2.34667	WRKY70
	GrapeSMv01_14g0366	197.59	60.5067	--
	GrapeSMv01_04g1235	36.7533	10.9433	RPP13L4
	GrapeSMv01_08g0821	8.03667	26.8633	--
	GrapeSMv01_05g0847	109.007	24.3233	--
	GrapeSMv01_18g1697	38.7267	80.2867	PER12
	GrapeSMv01_06g0247	15.5467	2.63333	LYK3
	GrapeSMv01_05g0394	47.8467	9.17333	DGAT3
	GrapeSMv01_03g0292	25.0533	53.67	POPTRDRAFT_821063
	GrapeSMv01_16g0176	17.1633	37.1567	RSH2
	GrapeSMv01_08g1590	139.31	41.9167	GK-2
	GrapeSMv01_14g0928	37.9967	3.02333	AXY4L
	GrapeSMv01_02g0792	13.5867	43.72	MO2
	GrapeSMv01_06g0238	61.2433	19.3233	NADK1
	GrapeSMv01_05g0913	34.9967	2.93	PMP22
	GrapeSMv01_10g0039	16.91	0.346667	TSB
	GrapeSMv01_07g0029	31.1767	7.23	--
	GrapeSMv01_04g0454	39.32	5.24667	--
	GrapeSMv01_07g1509	88.5333	28.0633	MSK-3
	GrapeSMv01_Sca0236	331.507	136.367	CML35
	GrapeSMv01_15g1063	434.003	38.32	LEA14-A
	GrapeSMv01_12g0018	44.1167	11.9167	GAUT15
	GrapeSMv01_09g1161	104.94	32.78	MKK5
	GrapeSMv01_18g0887	4.88667	11.83	KIN4A
	GrapeSMv01_18g0360	40.08	97.09	NIA
	GrapeSMv01_02g1228	35.5733	7.78	AMAT
	GrapeSMv01_16g1191	25.9267	54.29	FTSH11
	GrapeSMv01_18g1118	7.54667	25.9267	MAV_2732
	GrapeSMv01_05g1690	15.5167	37.0733	At3g25290
	GrapeSMv01_04g1327	55.2467	12.0867	F3H
	GrapeSMv01_11g0717	52.0033	17.4667	CBP60E
	GrapeSMv01_11g0196	9.97	0.443333	IQM4
	GrapeSMv01_11g0074	24.67	5.14667	SBT1.8
	GrapeSMv01_15g0473	16.01	38.7733	PAP11
	GrapeSMv01_02g0569	11.21	26.3933	HPR3
	GrapeSMv01_01g0176	19.8233	41.1933	POT10
	GrapeSMv01_02g0464	18.2733	39.34	WRKY21
	GrapeSMv01_01g0096	264.027	101.553	VSR6
	GrapeSMv01_07g1481	3.78333	10.84	--
	GrapeSMv01_04g0492	0.763333	7.58	HY5
	GrapeSMv01_18g0303	91.1867	32.08	GONST5
	GrapeSMv01_01g0522	25.3867	58.64	NUDT25
	GrapeSMv01_02g0385	229.82	83.1933	HIPP39
	GrapeSMv01_14g0239	113.74	31.8167	--
	GrapeSMv01_14g0112	12.69	33.3	htpX2
	GrapeSMv01_09g0854	77.6567	25.03	HSP70-17
	GrapeSMv01_07g0173	18.7767	3.78	At5g66900
	GrapeSMv01_12g0424	49.6367	13.43	PORA
	GrapeSMv01_07g0300	13.77	32.65	ATL6
	GrapeSMv01_05g0384	30.22	60.5833	CIPK1
	GrapeSMv01_01g1117	14.64	56.2667	--
	GrapeSMv01_11g0386	8.47	25.7667	HSFC1
	GrapeSMv01_03g0767	45.15	9.81333	At4g33920
	GrapeSMv01_13g0115	8.50333	28.1367	--
	GrapeSMv01_01g0551	141.99	42.1567	--
	GrapeSMv01_04g0229	95.2467	25.8933	LRK10
	GrapeSMv01_08g1452	4.65667	18.2067	MYB36
	GrapeSMv01_13g0754	20.4267	41.7067	BTR1
	GrapeSMv01_14g1916	186.843	71.3967	THA1
	GrapeSMv01_04g1127	80.8333	28.1433	BEH2
	GrapeSMv01_17g0789	15.6767	31.84	UGT83A1
	GrapeSMv01_10g0959	7.34667	20.96	At2g34460
	GrapeSMv01_04g0523	2.29	10.6167	--
	GrapeSMv01_12g1110	73.0933	24.3767	TULP8
	GrapeSMv01_10g0672	155.647	711.133	DRM1
	GrapeSMv01_16g1405	16.9867	4.78	JMJ25
	GrapeSMv01_01g0816	46.8267	8.48667	BRG3
	GrapeSMv01_14g0629	29.94	7.73667	AK2
	GrapeSMv01_07g0940	17.9467	38.9867	At1g33420
	GrapeSMv01_14g1334	23.9533	5.56333	ppx
	GrapeSMv01_02g0966	67.91	151.58	GDCSH
	GrapeSMv01_18g1298	402.163	179.03	PSI2
	GrapeSMv01_16g1193	4.28333	11.4967	PKP4
	GrapeSMv01_16g1232	8.7	0.883333	LRK10
	GrapeSMv01_10g0424	47.05	107.083	CXXS1
	GrapeSMv01_01g1186	57.3333	127.593	PCAP1
	GrapeSMv01_15g0606	32.84	69.86	BEN1
	GrapeSMv01_07g0911	11.0167	22.4133	DDB_G0282237
	GrapeSMv01_17g0851	9.89333	24.9633	--
	GrapeSMv01_10g0102	11.1467	28.63	--
	GrapeSMv01_11g0194	100.843	35.4433	CKL2
	GrapeSMv01_15g0773	80.6367	25.01	NAC014
	GrapeSMv01_19g0689	54.5233	12.74	At1g50590
	GrapeSMv01_04g0189	22.6367	4.47	FAP2
	GrapeSMv01_18g0015	52.2933	16.87	LYK5
	GrapeSMv01_02g0406	176.243	66.66	--
	GrapeSMv01_12g1127	13.1933	31.0567	GT3
	GrapeSMv01_12g1186	21.9033	5.68	-
	GrapeSMv01_15g0880	39.29	12.8633	CBP60E
	MSTRG.15573	29.7967	9.91667	RPPL1
	GrapeSMv01_05g1372	25.3833	3.88333	BHLH153
	GrapeSMv01_02g0531	29.4167	8.92333	KINUB
	GrapeSMv01_10g0537	31.8833	9.08667	CBP60B
	GrapeSMv01_Sca0341	29.5	76.15	At3g17800
	GrapeSMv01_07g1420	26.89	7.29	ERDJ3B
	GrapeSMv01_13g0056	49.06	13.1867	EFL1
	GrapeSMv01_07g2036	34.34	6.35667	At3g25290
	GrapeSMv01_12g0622	21.7167	6.24	GLR3.7
	GrapeSMv01_17g1057	13.5967	53.16	CYP736A117
	GrapeSMv01_02g0384	12.1433	1.07	ACS1
	GrapeSMv01_16g0713	27.48	59.6967	LRK10
	GrapeSMv01_17g0949	7.13333	15.4333	BOR1
	GrapeSMv01_06g0612	26.3867	4.84	--
	GrapeSMv01_07g1310	2.73333	21.8767	TSPO
	GrapeSMv01_01g0954	131.363	51.61	ATJ16
	GrapeSMv01_16g0889	48.0467	6.74333	GSVIVT00007357001
	GrapeSMv01_01g0577	36.4633	9.09667	RLK902
	GrapeSMv01_04g1484	119.04	36.18	MO2
	GrapeSMv01_17g0495	18.5333	37.9167	RPP8L2
	GrapeSMv01_02g0412	56.2167	13.0567	UBC5
	GrapeSMv01_10g0496	0.286667	14.2233	--
	GrapeSMv01_04g1485	31.1633	5.08667	MO2
	GrapeSMv01_05g0617	20.8767	4.43333	LECRK4
	GrapeSMv01_07g0602	40.24	11.44	FBL8
	GrapeSMv01_04g0563	33.94	8.06333	--
	GrapeSMv01_04g0522	26.6033	5.87333	--
	GrapeSMv01_07g0652	20.5167	3.61	At5g67130
	GrapeSMv01_16g1200	113.16	45.37	LRK10
	GrapeSMv01_04g0318	19.3967	4.24	At5g03795
	GrapeSMv01_05g0205	8.26	1.07	BOR2
	GrapeSMv01_14g0929	32.3933	1.07667	AXY4L
	GrapeSMv01_04g1153	33.4267	82.5833	--
	GrapeSMv01_15g1037	110.257	42.1233	CRCK2
	GrapeSMv01_10g1587	10.2667	20.7833	CERBERUS
	GrapeSMv01_10g1119	166.353	59.7767	CAT1
	MSTRG.16119	17.71	2.08	--
	GrapeSMv01_03g0789	82.1067	451.1	ZAT10
	GrapeSMv01_10g0514	90.9567	33.69	PVA42
	GrapeSMv01_10g0619	13.17	29.72	AIRP2
	GrapeSMv01_10g0661	20.46	49.2567	--
	GrapeSMv01_14g0525	23.0933	5.08	FER
	GrapeSMv01_08g1282	4.07333	22.1067	BIC1
	GrapeSMv01_05g0783	7.12	0.8	ETR2
	GrapeSMv01_11g0753	6.79667	16.97	STP7
	GrapeSMv01_04g0186	18.0433	41.01	--
	GrapeSMv01_19g0198	15.1933	33.5233	PORA
	GrapeSMv01_16g0884	5.02667	35.04	--
	GrapeSMv01_10g0680	69.6067	25.57	NSL1
	GrapeSMv01_08g1578	43.5867	11.8067	SAP11
	GrapeSMv01_16g1047	68.26	9.26667	HIPP39
	GrapeSMv01_08g0492	4.58667	10.89	XPO7
	GrapeSMv01_12g0582	2.15333	9.11333	GH3.10
	GrapeSMv01_13g0610	302.663	133.947	EF1
	GrapeSMv01_16g1362	51.3667	16.3867	mfsd5
	GrapeSMv01_17g0353	9.26	1.63667	BTS
	GrapeSMv01_18g0804	64.0367	19.1967	APT1
	GrapeSMv01_11g0181	41.4667	13.36	PUB34
	GrapeSMv01_Sca0045	2.9	56.3333	CAB40
	GrapeSMv01_19g1290	7.21333	23.4767	MYB58
	GrapeSMv01_01g1038	5.29	16.6267	--
	GrapeSMv01_13g0005	1.25333	8.65333	CYP714A1
	GrapeSMv01_12g0380	18.5167	0.833333	BHLH162
	GrapeSMv01_18g1303	11.5233	38.54	ATJ11
	GrapeSMv01_07g1316	27.5867	57.0567	TPK1
	GrapeSMv01_18g0371	19.7633	4.11	B3GALT7
	GrapeSMv01_11g1303	9.01	0.65	Os07g0190000
	GrapeSMv01_05g0036	183.193	69.5	ephA
	GrapeSMv01_15g1071	43.3233	10.29	WRKY22
	GrapeSMv01_08g0356	7.55	17.5967	ERDJ3A
	GrapeSMv01_18g0910	20.9733	4.90333	sbt3
	GrapeSMv01_18g0738	56.2833	20.7967	--
	GrapeSMv01_06g0974	18.3933	4.56	NET4A
	GrapeSMv01_06g1494	26.6933	6.97667	AGC1-5
	GrapeSMv01_14g1570	16.99	5.54667	At4g27220
	GrapeSMv01_08g1503	29.4833	65.5	--
	GrapeSMv01_04g1024	22.8333	2.61667	DSP3
	GrapeSMv01_01g0330	18.8433	42.87	--
	GrapeSMv01_18g2442	112.837	48.03	ARF1
	GrapeSMv01_05g0153	7.83	18.67	BHLH147
	GrapeSMv01_13g1098	19.6867	3.07333	At3g02645
	GrapeSMv01_04g0326	16.1233	2.20667	NPR4
	GrapeSMv01_16g1234	11.9833	32.7767	LRK10
	GrapeSMv01_08g0548	33.4433	8.50667	WRKY24
	GrapeSMv01_16g1252	21.92	3.77	LRK10
	GrapeSMv01_07g0414	2.43333	7.76667	WAV3
	GrapeSMv01_10g1041	15.8833	33.7133	DELTA-OAT
	GrapeSMv01_08g1179	15.3033	39.2933	--
	GrapeSMv01_06g0439	16.16	33.6567	RIBA3
	GrapeSMv01_09g1223	21.4267	48.4033	MIP1A
	GrapeSMv01_05g0226	33.7967	12.7333	SPL1
	GrapeSMv01_15g0333	124.01	52.63	DRP1E
	GrapeSMv01_03g0602	7.75333	20.42	EFM
	GrapeSMv01_01g1709	8.33333	27.6367	NPF6.1
	GrapeSMv01_04g0218	15.3967	32.03	AFR
	GrapeSMv01_01g0055	25.74	8.31333	--
	GrapeSMv01_15g0393	24.8333	1.58	--
	GrapeSMv01_13g0858	10.6333	23.9167	PDR2
	GrapeSMv01_16g1293	11.0433	34.3767	--
	GrapeSMv01_05g1503	6.64667	20.4767	GUN4
	GrapeSMv01_08g1001	20.4267	42.19	FHL
	GrapeSMv01_04g1330	11.0333	26.9767	BHLH121
	GrapeSMv01_03g0900	6.28	16.2767	EGY3
	GrapeSMv01_18g1200	8.29333	23.6267	PAP2
	GrapeSMv01_15g0858	47.6767	18.9433	PUB44
	GrapeSMv01_02g1015	91.7767	30.6233	At4g09580
	GrapeSMv01_07g0168	8.72667	0.406667	Bp10
	GrapeSMv01_07g2016	31.5967	8.99333	GAUT8
	GrapeSMv01_14g1065	21.65	5.76333	At3g28850
	GrapeSMv01_12g0613	19.1933	5.75667	ACO3
	GrapeSMv01_04g1219	45.63	5.71	-
	GrapeSMv01_04g0247	10.3267	31.9	--
	GrapeSMv01_10g0362	24.17	3.35333	--
	GrapeSMv01_05g0856	100.187	17.9933	--
	GrapeSMv01_06g0491	68.2833	26.6133	PUB13
	GrapeSMv01_12g1554	170.61	70.8033	KOR
	GrapeSMv01_10g0128	25.58	59.8933	--
	GrapeSMv01_06g0127	1.02333	7.81	NPF7.1
	GrapeSMv01_09g0783	16.8367	39.58	--
	GrapeSMv01_04g1172	64.08	15.8933	AEL1
	GrapeSMv01_09g0602	38.2233	5.14	--
	GrapeSMv01_18g0433	442.503	196.62	SPBC2A9.03
	GrapeSMv01_07g0293	105.5	31.68	--
	GrapeSMv01_09g1139	8.91667	22.2667	--
	GrapeSMv01_07g0710	39.8033	10.7833	TRAPPC12
	GrapeSMv01_Sca0149	12.8533	29.0233	Pgap3
	GrapeSMv01_08g0734	6.12667	0.416667	PIN1C
	GrapeSMv01_14g1013	9.15667	0.946667	-
	GrapeSMv01_16g1247	24.7133	50.0667	LRK10
	GrapeSMv01_04g0652	31.7533	7.32333	VQ11
	GrapeSMv01_01g0450	19.6967	2.86667	LRK10
	GrapeSMv01_16g1298	171.537	63.0867	--
	GrapeSMv01_18g1003	98.2633	40.5133	NAT3
	GrapeSMv01_01g0800	35.6867	10.98	CRK2
	GrapeSMv01_04g1155	3.76333	15.7233	--
	GrapeSMv01_08g1628	7.58	22.3133	ATJ6
	GrapeSMv01_16g0894	61.5533	13.2233	VIT_16s0100g01030
	GrapeSMv01_15g0493	36.0167	7.75	ephA
	GrapeSMv01_03g1264	7.34333	19.1133	At4g20840
	GrapeSMv01_14g1034	13.07	2.02	-
	GrapeSMv01_11g0972	39.83	12.4733	PBL17
	GrapeSMv01_12g0675	3.49667	0.186667	TPS12
	GrapeSMv01_18g1006	154.257	63.7767	TPP2
	GrapeSMv01_12g1095	16.35	4.01	At1g56140
	GrapeSMv01_11g0229	12.63	27.6467	--
	GrapeSMv01_06g0252	7.98667	16.0567	BLH8
	GrapeSMv01_07g1311	28.69	6.64333	XXT2
	GrapeSMv01_01g0749	34.4467	9.38333	--
	GrapeSMv01_15g0916	28.84	8.77333	DRP1A
	GrapeSMv01_08g1017	49.2733	100.717	OHP1
	GrapeSMv01_17g0297	180.077	64.0267	HSP26-A
	GrapeSMv01_11g1251	19.8433	0.203333	XTH23
	GrapeSMv01_14g1738	4.09667	11.3633	TSO1
	GrapeSMv01_11g0532	7.83667	23.79	SPX2
	GrapeSMv01_17g1198	36.71	9.15	At5g08350
	GrapeSMv01_18g1237	19.6467	39.7033	CYP71A1
	GrapeSMv01_16g1197	24.12	5.76667	LRK10
	GrapeSMv01_15g0974	2.45	11.5567	AS
	GrapeSMv01_19g0735	124.343	47.18	SAT1
	GrapeSMv01_05g1170	102.743	32.3167	GAE6
	GrapeSMv01_14g0947	32.2167	9.92333	--
	GrapeSMv01_08g1159	11.49	23.24	AIRP2
	GrapeSMv01_08g0258	1.60667	6.85333	Xyl2
	GrapeSMv01_06g0363	8.57333	20.82	--
	GrapeSMv01_16g1253	20.99	3.91	LRK10
	GrapeSMv01_09g1143	6.49667	15.74	--
	GrapeSMv01_08g1480	0.58	8.79333	KIN7O
	GrapeSMv01_09g1239	6.1	15.3633	At1g51550
	GrapeSMv01_06g0257	20.5433	4.1	PAL
	GrapeSMv01_06g1473	17.26	36.45	At5g22620
	GrapeSMv01_12g1037	7.11	16.31	BIPP2C1
	GrapeSMv01_08g1821	15.1667	1.42	GNS1
	GrapeSMv01_18g2221	9.18	1.24333	RPV1
	GrapeSMv01_02g0983	108.343	45.0933	MYC2
	GrapeSMv01_11g1128	33.11	4.18667	ACD11
	GrapeSMv01_05g0543	16.34	3.82667	--
	GrapeSMv01_18g1475	36.6467	8.96	SUC2
	GrapeSMv01_16g0079	31.2367	9.32667	PSL5
	GrapeSMv01_15g1052	64.29	26.42	MMK2
	GrapeSMv01_06g1050	6.63333	0.776667	NEK5
	GrapeSMv01_03g0761	9.67	1.32	--
	GrapeSMv01_07g0429	13.5733	1.86667	BHLH25
	GrapeSMv01_05g0548	11.9167	25.8033	RNR2A
	GrapeSMv01_03g0976	56.71	17.61	HEMA1
	GrapeSMv01_12g1208	10.0333	1.80667	RUN1
	GrapeSMv01_18g0090	31.4267	4.80667	PIX13
	GrapeSMv01_12g0745	1.36	7.37667	NDB3
	GrapeSMv01_11g0882	25.9233	6.09667	HHP2
	GrapeSMv01_14g1424	25.4567	7.35667	At3g11710
	GrapeSMv01_16g0064	14.7067	2.02667	-
	GrapeSMv01_10g1017	9.53667	1.05667	OSCBPY
	GrapeSMv01_01g1083	18.05	2.25	HVA22A
	GrapeSMv01_15g0639	40.5933	9.93	CXE8
	GrapeSMv01_18g0048	23.1933	6.29	sdr42e1
	GrapeSMv01_02g0601	37.2033	2.07667	DTX49
	GrapeSMv01_09g0421	4.17667	13.9267	--
	GrapeSMv01_04g0666	16.23	2.99	At5g10770
	GrapeSMv01_18g0278	227.087	99.1767	PDI
	GrapeSMv01_02g0499	8.89333	20.7933	CYP75B137
	GrapeSMv01_04g0019	34.81	2.27667	MIK1
	GrapeSMv01_12g0960	6.33	15.8267	PAA1
	GrapeSMv01_10g0479	6.35333	17.9133	At1g11410
	GrapeSMv01_18g1625	0.59	9.26333	HSP17.9A
	GrapeSMv01_13g0830	48.5733	15.8533	OTU4
	GrapeSMv01_12g0871	21.7733	5.45	At1g11050
	GrapeSMv01_01g1057	57.2067	19.4767	WRKY72A
	GrapeSMv01_13g0716	3.72	12.58	--
	GrapeSMv01_19g0171	17.7867	44.3533	--
	GrapeSMv01_12g0822	16.8333	1.58	FLA2
	GrapeSMv01_07g1342	9.40333	25.5633	CSE
	GrapeSMv01_05g1712	24.5833	6.09667	TMK4
	GrapeSMv01_13g0705	4.71	13.6	At3g53190
	GrapeSMv01_13g1653	41.75	12.72	FKBP42
	MSTRG.15627	4.49333	0.736667	RPPL1
	GrapeSMv01_04g0646	31.0333	8.78667	At5g25050
	GrapeSMv01_05g0446	28.3067	59.0767	RALFL33
	GrapeSMv01_13g0658	86.5333	35.3033	OST1B
	GrapeSMv01_11g0275	13.5767	0.46	MYB36
	GrapeSMv01_07g2052	11.72	1.01667	MEBL
	GrapeSMv01_04g1678	3.56667	14.12	UGT29
	GrapeSMv01_18g1296	4.48333	0.576667	CERBERUS
	GrapeSMv01_14g0039	16.7567	37.28	htpX2
	GrapeSMv01_12g0571	34.8433	5.03667	--
	GrapeSMv01_10g0589	8.07667	0.62	PPO
	GrapeSMv01_19g0149	24.1233	48.2533	PVA41
	GrapeSMv01_04g0018	61.0667	3.19	CLV1A
	GrapeSMv01_14g1571	21.2167	5.24333	At5g63020
	GrapeSMv01_05g1652	82.3367	26.9967	PRN2
	GrapeSMv01_17g0128	57.15	9.50333	--
	GrapeSMv01_17g0637	8.45667	17.8367	ICS2
	GrapeSMv01_06g0902	12.5267	30.4967	SLP1
	GrapeSMv01_07g1241	33.9967	1.84333	--
	GrapeSMv01_01g0289	7.27333	17.8033	ZCCHC8
	GrapeSMv01_16g1354	28.27	8.98	GYP7
	GrapeSMv01_11g0890	23.5867	2.89667	GGP3
	GrapeSMv01_04g0021	34.4567	2.15333	MIK1
	GrapeSMv01_11g0865	3.99667	21.8933	MIK2
	GrapeSMv01_05g0632	28.3733	6.9	surE
	GrapeSMv01_16g0840	9.61333	20.99	Pgap3
	GrapeSMv01_07g0004	30.1167	10.4667	At5g48380
	GrapeSMv01_01g0851	117.14	47.0333	BCA2
	GrapeSMv01_07g0100	168.463	73.2867	At5g48380
	GrapeSMv01_06g0454	13.4867	28.6267	--
	GrapeSMv01_17g0351	15.2567	2.24667	BC10
	GrapeSMv01_17g0564	23.3433	3.68333	COB
	GrapeSMv01_07g0314	16.2333	33.63	NIFS1
	GrapeSMv01_16g0844	50.4733	10.97	ERF026
	GrapeSMv01_05g1429	38.4767	11.95	CRT3
	GrapeSMv01_17g0496	28.8467	62.43	CAS
	GrapeSMv01_10g0575	78.39	35.0967	CHR28
	GrapeSMv01_16g1325	21.5533	44.9767	PSRP1
	GrapeSMv01_02g0614	60.5767	10.8267	ERG3
	GrapeSMv01_19g0030	206.46	90.3433	CIGR1
	GrapeSMv01_06g1423	5.63333	19.85	ATL57
	GrapeSMv01_15g1099	16.6333	5.2	TRM32
	GrapeSMv01_08g0933	21.0933	67.4233	MtrDRAFT_AC149210g1v1
	GrapeSMv01_02g0280	12.4467	2.66333	At1g64390
	GrapeSMv01_18g1386	7.86333	23.0433	SWEET1
	GrapeSMv01_07g0010	4.88	15.89	dhmA
	GrapeSMv01_18g1415	21.7	5.35667	SPAC57A10.07
	GrapeSMv01_08g0647	3.97	10.0767	XPO7
	GrapeSMv01_03g0171	72.7767	29.03	ERD7
	GrapeSMv01_11g0290	174.987	62.34	PRO1
	GrapeSMv01_18g0332	149.867	61.2267	FLS
	GrapeSMv01_07g0846	34.7867	8.05667	BAT1
	GrapeSMv01_01g0720	2.35667	11.9233	CYP71B35
	GrapeSMv01_08g1449	17.9367	4.32	Os04g0560200
	GrapeSMv01_16g1246	16.95	35.07	LRK10
	GrapeSMv01_18g0136	13.4	1.01333	AATL1
	GrapeSMv01_04g0860	44.8133	16.1533	PAO4
	GrapeSMv01_16g0295	1.12667	4.49667	SRS2
	GrapeSMv01_01g1593	68.8267	19.7767	--
	GrapeSMv01_11g1252	19.7467	0.463333	XTH23
	GrapeSMv01_16g1336	76.4933	28.98	CID10
	GrapeSMv01_16g0890	17.3967	2.06667	GSVIVT00007357001
	GrapeSMv01_19g0921	3.71333	15.04	At5g56260
	GrapeSMv01_04g0511	29.71	10.1933	RDR6
	GrapeSMv01_10g1454	18.2533	1.01333	At5g66900
	GrapeSMv01_02g0908	41.5967	12.1933	At4g18030
	GrapeSMv01_17g1036	359.293	111.72	--
	GrapeSMv01_16g1304	6.58333	14.9933	LECRKS7
	GrapeSMv01_15g0755	51.8233	9.80667	BAP2
	GrapeSMv01_05g0237	6.7	18.1633	CRSH
	GrapeSMv01_05g0581	29.63	8.87667	RHF1A
	GrapeSMv01_15g1069	20.7867	4.17	KPHMT1
	GrapeSMv01_13g0364	20.1333	1.43333	--
	GrapeSMv01_13g1035	16.6667	34.9867	--
	GrapeSMv01_19g0362	19.25	3.55	CRPK1
	GrapeSMv01_11g0913	18.4367	37.18	--
	GrapeSMv01_03g0875	7.31333	0.276667	SCPL18
	MSTRG.1894	25.3033	7.5	YDA
	GrapeSMv01_11g0231	18.46	6.09667	GDCSP
	GrapeSMv01_19g0328	4.37	14.0567	RTN4IP1
	GrapeSMv01_19g0298	20.8633	50.6033	At5g53970
	GrapeSMv01_13g1080	93.8033	39.6133	CPK1
	GrapeSMv01_01g0046	67.7367	24.5867	UPS2
	GrapeSMv01_04g0175	27.5967	7.21333	CKX7
	GrapeSMv01_16g0596	6.57333	0.816667	FER
	GrapeSMv01_10g0590	8.30667	0.44	PPO
	GrapeSMv01_16g0289	9.9	0.71	AMC1
	GrapeSMv01_15g0587	19.12	43.86	CML25
	GrapeSMv01_18g1122	95.94	17.0867	At2g16250
	GrapeSMv01_05g1742	19.6867	2.33	UGT75L6
	GrapeSMv01_11g0329	25.1333	3.39667	DREB3
	GrapeSMv01_01g0047	85.2267	32.4267	erlin2-b
	GrapeSMv01_01g1055	6.14667	16.4867	--
	GrapeSMv01_09g1059	2.92	11.6433	ABCC13
	GrapeSMv01_16g1349	14.95	2.77	SBT3.3
	GrapeSMv01_05g0610	25.5233	8.43	LOX1.5
	GrapeSMv01_13g0333	2.48333	15.8833	At1g07660
	GrapeSMv01_01g0028	91.6167	31.5233	MES11
	GrapeSMv01_12g0554	57.9733	21.88	PDIL2-3
	GrapeSMv01_06g0317	9.2	20.8367	MLO3
	GrapeSMv01_04g0030	82.14	27.73	TDR
	GrapeSMv01_18g1755	17.6333	36.01	FBPban1
	GrapeSMv01_03g0903	128.96	52.7433	TUBA
	GrapeSMv01_02g0714	104.727	35.6833	PGSIP8
	GrapeSMv01_19g0482	13.7633	3.32333	SWEET2
	GrapeSMv01_16g0618	5.83333	22.4367	PEX11B
	GrapeSMv01_01g0271	29.68	9.46667	PERK9
	GrapeSMv01_18g1161	13.8533	0.816667	JMT
	GrapeSMv01_06g0619	4.51	13.8733	UGT76A2
	GrapeSMv01_18g1688	81.44	33.59	URGT5
	GrapeSMv01_19g1340	30.9333	8.65333	MTP10
	GrapeSMv01_10g0475	5.66333	11.98	-
	GrapeSMv01_07g0221	141.283	36.2467	PLAT2
	GrapeSMv01_06g0099	220.347	61.62	DIR7
	GrapeSMv01_07g0134	6.25	31.56	--
	GrapeSMv01_12g0799	3.84667	19.8533	CF-9
	GrapeSMv01_18g0248	17.0333	3.89	At4g12770
	GrapeSMv01_09g0589	11.4733	2.10333	At5g63020
	GrapeSMv01_07g1478	11.8	25.71	AGDP1
	GrapeSMv01_15g0904	42.33	13.35	APF2
	GrapeSMv01_15g0299	147.137	63.1767	URA6
	GrapeSMv01_13g1615	3.40667	12.9667	SIGD
	GrapeSMv01_08g0108	5.19	15.0233	BDG4
	GrapeSMv01_10g0516	61.74	19.15	STP1
	GrapeSMv01_02g0480	8.40333	1.04333	SKU5
	GrapeSMv01_07g0885	21.2167	5.44667	DGK2
	GrapeSMv01_03g0764	7.28667	15.5767	At5g02860
	GrapeSMv01_01g1349	40.6933	12.57	OsI_033149
	GrapeSMv01_17g0459	4.32	9.76	MSH2
	GrapeSMv01_07g1382	64.0267	26.4633	FUM1
	GrapeSMv01_01g0495	13.4567	36.1733	HIPP21
	GrapeSMv01_04g1264	8.28	1.33667	BGAL3
	GrapeSMv01_03g0963	23.7333	5.97	--
	GrapeSMv01_01g0596	20.4967	6.18	MAP70.2
	GrapeSMv01_08g1063	4.97333	13.6767	BLH9
	GrapeSMv01_02g0693	41.3933	90.69	ATG8F
	GrapeSMv01_18g0880	7.90667	24.1433	WRKY7
	GrapeSMv01_17g0582	3.77333	11.5133	TCP5
	GrapeSMv01_11g0506	79.49	30.8733	EMB1187
	GrapeSMv01_02g0295	4.01667	16.1	ANR
	GrapeSMv01_11g0396	3.38333	29.8367	--
	GrapeSMv01_06g1357	2.14667	9.58	ABCG15
	GrapeSMv01_05g0684	155.84	54.1533	--
	GrapeSMv01_11g0318	11.4033	2.63	RDR5
	GrapeSMv01_12g0798	4.25	22.64	9DC3
	GrapeSMv01_17g1067	3.07	11.0167	CYP736A117
	GrapeSMv01_Sca0124	8.04333	38.6033	FBA2
	GrapeSMv01_17g1253	35.1167	11.0633	--
	GrapeSMv01_09g1127	22.5233	3.75	--
	GrapeSMv01_04g1668	8.18333	0.686667	GSVIVT00026920001
	GrapeSMv01_07g0453	25.8167	6.53667	CGR2
	GrapeSMv01_07g0160	57.9967	17.4633	SABP2
	GrapeSMv01_06g0143	69.4367	28.7167	LOX2.1
	GrapeSMv01_05g0905	18.51	5.68667	Nom1
	GrapeSMv01_05g1644	7.69	17.2633	UGT92A1
	GrapeSMv01_07g0873	9.76667	20.2733	NDC1
	GrapeSMv01_16g0063	13.5667	2.17667	PAL
	GrapeSMv01_18g1146	58.69	22.8433	slr0537
	GrapeSMv01_18g2174	5.38333	0.55	DAR1
	GrapeSMv01_08g0055	14.2167	2.57667	--
	GrapeSMv01_12g1274	5.18	11.5667	AKT2
	GrapeSMv01_14g0746	13.83	3.98	SERGT1
	GrapeSMv01_10g0445	16.08	3.26333	TPS13
	GrapeSMv01_06g0527	26.3733	7.62333	RBL1
	MSTRG.13603	18.5533	48.0333	--
	GrapeSMv01_15g0262	6.65667	1.57	At4g27220
	GrapeSMv01_15g0546	155.917	68.7933	EPSPS-1
	GrapeSMv01_05g0469	1.80667	6.63667	Os11g0547000
	GrapeSMv01_19g0065	80.1467	27.0033	FQR1
	GrapeSMv01_01g1109	74.3967	28.6567	--
	GrapeSMv01_01g0387	55.79	16.1767	ENDO2
	GrapeSMv01_05g0723	27.7867	10.8133	--
	GrapeSMv01_14g0522	14.1467	1.88	FER
	GrapeSMv01_14g0811	6.95	16.39	--
	GrapeSMv01_08g0973	43.3033	13.6467	PLL5
	GrapeSMv01_17g0333	14.78	2.61	--
	GrapeSMv01_16g0128	36.0067	10.3967	MCC1
	GrapeSMv01_12g0479	83.9733	32.07	--
	GrapeSMv01_06g0098	168.667	45.1833	DIR19
	GrapeSMv01_18g0254	1.91333	5.95	CYCA1-1
	GrapeSMv01_13g0068	18.59	3.13667	At5g05600
	GrapeSMv01_09g1266	9.68	1.11333	At3g50940
	GrapeSMv01_17g0651	117.003	49.7467	ABCA7
	GrapeSMv01_05g1178	24.9833	52.38	ATJ20
	GrapeSMv01_02g0595	35.8333	11.7767	UTR4
	GrapeSMv01_18g0208	13.76	2.96333	WAK2
	GrapeSMv01_18g2046	6.99333	17.8667	UGT88F3
	GrapeSMv01_16g0968	27.0767	1.95	--
	GrapeSMv01_01g0436	19.7267	4.86	ELP2
	MSTRG.10316	14.4367	2.73333	At2g19230
	GrapeSMv01_05g0660	38.2033	4.88667	yoaA
	GrapeSMv01_01g0722	1.26333	8.40667	CYP71B35
	GrapeSMv01_19g0748	68.4533	25.3133	TPK1
	GrapeSMv01_19g0284	22.72	4.52	At3g15260
	GrapeSMv01_17g0343	57.0367	20.7567	LRK10L-1.2
	GrapeSMv01_05g0831	109.437	25.37	--
	GrapeSMv01_08g1269	15.5933	31.3867	ACA1
	GrapeSMv01_17g0616	30.48	9.7	NPF2.11
	GrapeSMv01_18g0913	12.5033	1.55333	--
	GrapeSMv01_01g0622	25.3733	5.77333	BPA1
	GrapeSMv01_04g0165	24.63	8.34	--
	GrapeSMv01_11g0843	1.32667	11.9667	--
	GrapeSMv01_07g0076	8.32	16.7267	MLO1
	GrapeSMv01_01g0090	6.98	0.756667	RPM1
	GrapeSMv01_02g0520	15.57	2.28	At4g22758
	GrapeSMv01_18g1302	0.45	5.44	-
	GrapeSMv01_08g0667	1215.16	557.687	CAM-1
	GrapeSMv01_11g1195	6.17667	18.37	NIFU3
	GrapeSMv01_14g1662	4.33667	11.3033	NHX2
	GrapeSMv01_09g1174	23.2967	5.64667	GLUTRBP
	GrapeSMv01_03g0349	49.5167	13.08	EXL5
	GrapeSMv01_18g0895	48.1067	15.3367	At3g50280
	GrapeSMv01_15g0882	7.07	0.543333	MYB3
	GrapeSMv01_08g0432	72.8767	20.19	WRKY24
	GrapeSMv01_19g0488	8.07333	20.0233	CRLK1
	GrapeSMv01_11g0830	22.79	2.16333	ENODL1
	GrapeSMv01_02g0752	6.76	14.94	CYP72A225
	GrapeSMv01_18g1345	16.0733	3.98	LARP1C
	GrapeSMv01_02g0599	23.9	0.346667	ERF026
	GrapeSMv01_14g0518	47.4367	15.6767	FER
	GrapeSMv01_11g0613	4.97333	13.08	MGD2
	GrapeSMv01_07g1019	21.9833	5.87333	PKP1
	GrapeSMv01_19g1336	79.36	26.1367	GAPCP1
	GrapeSMv01_13g0515	37.3267	77.0067	HSP18.5-C
	GrapeSMv01_Sca0220	27.2867	5.26	CRK10
	GrapeSMv01_19g0712	2.44333	11.7067	--
	GrapeSMv01_18g2483	13.6367	29.4233	dhmA2
	GrapeSMv01_07g0708	33.73	10.9067	TRAPPC12
	GrapeSMv01_07g2067	54.8767	19.6333	CHIP
	GrapeSMv01_15g0009	91.8733	39.7767	Os03g0815200
	GrapeSMv01_05g0046	1.97667	9.62333	RAP2-3
	GrapeSMv01_10g1550	12.8633	1.07667	GSVIVT00004047001
	GrapeSMv01_06g0449	22.7733	6.99333	UFC
	GrapeSMv01_Sca0509	12.76	1.86667	LAZ5
	GrapeSMv01_08g0951	11.9033	3.68667	OXP1
	GrapeSMv01_08g0534	5.49	12.12	DTX44
	GrapeSMv01_05g0045	58.1867	24.9533	--
	GrapeSMv01_01g0222	3.06667	6.93	--
	GrapeSMv01_08g1082	3.54667	15.07	COPT6
	GrapeSMv01_15g1038	31.5533	12.0367	--
	GrapeSMv01_08g0636	14.46	3.43333	--
	GrapeSMv01_11g0554	185.33	62.56	At2g25060
	MSTRG.21946	16.2867	0.423333	VIT_19s0014g04930
	GrapeSMv01_05g1148	2.43667	9.65667	ERF062
	GrapeSMv01_02g0067	6.90333	1.31667	GL3
	GrapeSMv01_08g1537	74.43	26.83	HSFB3
	MSTRG.1081	7.13333	1.28667	--
	GrapeSMv01_09g0420	12.7567	28.61	RHN1
	GrapeSMv01_06g0287	30.5033	11.1933	PDIL1-4
	GrapeSMv01_06g0486	12.1	2.25333	--
	GrapeSMv01_01g1010	1.26667	5.88667	NPF2.13
	GrapeSMv01_14g0493	34.5067	12.34	RUG3
	GrapeSMv01_16g0888	36.5567	9.59333	GSVIVT00007357001
	GrapeSMv01_18g2430	23.1233	3.75333	CYP714C2
	GrapeSMv01_05g1435	10.4967	1.81	--
	GrapeSMv01_13g1526	13.1133	28.06	ABA2
	GrapeSMv01_11g0871	25.7467	10.45	ATG11
	GrapeSMv01_09g0271	18.9433	7.09333	At2g19210
	GrapeSMv01_14g1519	77.0467	31.8467	PNC1
	GrapeSMv01_18g0363	91.42	42.77	MEKK1
	GrapeSMv01_19g0389	36.4	10.9233	MBF1A
	GrapeSMv01_10g0920	34.9933	14.7067	CTDSPL2
	GrapeSMv01_15g0545	17.17	3.34	GAE3
	GrapeSMv01_13g0502	2.44	20.3267	HSP18.2
	GrapeSMv01_18g1337	30.31	8.44	--
	GrapeSMv01_11g0752	11.8567	24.4133	At5g35170
	GrapeSMv01_05g0370	43.2633	18.34	SPL1
	GrapeSMv01_01g0369	9.89667	0.363333	HMT1
	GrapeSMv01_03g0357	1.33	6.75	MPT1
	GrapeSMv01_15g1160	12.0067	2.99667	At1g50180
	GrapeSMv01_04g0538	2.68333	8.75667	ACR2
	GrapeSMv01_06g0843	68.48	24.5	RANBP1C
	GrapeSMv01_08g1102	43.25	8.11	OFUT28
	GrapeSMv01_15g0848	49.94	17.3	At2g46620
	GrapeSMv01_04g1072	97.2433	39.9667	At1g65240
	GrapeSMv01_07g1270	55.4933	23.3533	--
	GrapeSMv01_08g1632	18.9533	6.01333	--
	MSTRG.21262	7.84667	1.79667	--
	GrapeSMv01_01g1202	23.6967	5.95667	ctps1
	GrapeSMv01_09g0233	5.69	11.9867	ABCC8
	GrapeSMv01_18g1502	20.55	54.7967	--
	GrapeSMv01_02g0247	7.77667	1.26	SUN5
	GrapeSMv01_01g1329	150.913	73.1833	PGD2
	GrapeSMv01_12g1431	26.4367	7.14667	RABD1
	GrapeSMv01_17g0935	24.8267	6.15	SRO5
	GrapeSMv01_18g0530	39.3333	9.34667	--
	GrapeSMv01_17g1220	41.2633	13.1867	At5g08350
	GrapeSMv01_10g1549	14.6133	2.03667	GSVIVT00004047001
	GrapeSMv01_04g0125	32.0067	8.97333	RBP1
	GrapeSMv01_17g0325	11.18	2.61667	At5g13980
	GrapeSMv01_03g0719	17.4567	3.64	MYB73
	GrapeSMv01_02g0835	17.5	3.62333	--
	GrapeSMv01_16g0152	45.7833	18.0533	4CL3
	GrapeSMv01_19g1234	4.63333	10.97	RGA3
	GrapeSMv01_18g1310	4.89333	15.9733	--
	GrapeSMv01_04g0745	97.8633	27.3133	NHL6
	GrapeSMv01_13g0143	3.70667	19.6233	RER6
	GrapeSMv01_08g0814	41.3067	15.9333	P58IPK
	GrapeSMv01_06g1497	1.25333	3.53333	POL2A
	GrapeSMv01_19g0532	8.76667	2.41	ABCB15
	GrapeSMv01_14g0965	28.4733	6.30333	P4H7
	GrapeSMv01_08g0506	19.0433	4.18667	SIP2-1
	GrapeSMv01_10g0405	36.8167	9.88	CRK10
	GrapeSMv01_12g0385	83.6933	34.4933	--
	GrapeSMv01_10g0547	62.1267	26.87	AGD5
	GrapeSMv01_11g0303	125.02	51.7433	HXK1
	GrapeSMv01_05g1515	70.59	27.1433	DDB_G0270580
	GrapeSMv01_17g0382	1041.11	3212.87	RBCS1
	GrapeSMv01_02g0459	1.93333	7.36667	NPF6.3
	GrapeSMv01_03g1207	6.82333	1.10667	RPP8L2
	GrapeSMv01_07g0338	24.73	4.7	PAS2A
	GrapeSMv01_18g1208	24.5367	9.49333	At1g62020
	GrapeSMv01_18g0432	7.13	1.16	BXL7
	GrapeSMv01_18g0310	22.6333	6.93667	--
	GrapeSMv01_10g0388	40.01	13.6767	GAUT4
	GrapeSMv01_01g0750	25.8633	61.5167	XERICO
	GrapeSMv01_02g1336	107.817	47.57	CYP707A2
	GrapeSMv01_15g0789	5.97667	12.0467	ATG1A
	GrapeSMv01_19g0589	52.67	19.2967	PLSC
	GrapeSMv01_16g1397	1.54667	5.18	--
	GrapeSMv01_18g2167	11.8967	2.15667	--
	GrapeSMv01_10g0749	4.82667	14.53	At1g28580
	GrapeSMv01_18g2122	12.1833	4.66	RPV1
	GrapeSMv01_07g0921	30.6933	9.05	MYB330
	GrapeSMv01_14g0524	25.83	2.13667	--
	GrapeSMv01_04g1539	42.7267	11.4467	PME51
	GrapeSMv01_03g0733	92.09	40.97	MTK
	GrapeSMv01_01g0310	12.7333	0.873333	LAR
	GrapeSMv01_02g1231	126.383	54.0567	AMAT
	GrapeSMv01_03g0129	106.52	42.56	At2g21160
	GrapeSMv01_04g1114	24.77	6.96	HOS3
	GrapeSMv01_15g0772	37.9267	11.68	At1g02270
	GrapeSMv01_17g0627	8.94667	21.0967	NPF4.6
	GrapeSMv01_08g0260	27.7967	8.78	FLA17
	GrapeSMv01_09g0385	19.5533	5.1	PDIL1-6
	GrapeSMv01_18g0839	4.71333	10.8833	At3g47570
	GrapeSMv01_18g0821	42.6233	8.55667	CYTB5-D
	GrapeSMv01_17g0079	40.1867	15.9333	PAT07
	GrapeSMv01_01g1283	117.17	50.2833	PGD2
	GrapeSMv01_03g0046	49.65	22.0133	KIN7E
	GrapeSMv01_13g0035	28.67	10.88	ATE1
	GrapeSMv01_14g0990	84.3233	36.14	GLCAT14B
	GrapeSMv01_01g0265	23.7033	1.04	RHA2B
	GrapeSMv01_18g2198	12.9467	3.64333	-
	GrapeSMv01_07g0024	9.59333	1.51	--
	GrapeSMv01_05g0367	163.06	69.7467	METK2
	GrapeSMv01_19g0664	14.09	3.79333	MAP65-1
	GrapeSMv01_15g0457	0.496667	11.7133	BIC1
	GrapeSMv01_17g0366	35.88	11.7967	MYB62
	GrapeSMv01_18g0450	10.0233	1.63667	STP5
	GrapeSMv01_12g0487	134.183	54.27	WRKY6
	GrapeSMv01_01g0109	6.69	0.84	RPM1
	GrapeSMv01_07g0034	13.87	2.57	--
	GrapeSMv01_17g0479	16.7167	3.61	WAKL8
	GrapeSMv01_07g0041	16.6633	4.47333	--
	GrapeSMv01_14g1429	22.9367	4.69333	SRC2
	GrapeSMv01_17g0075	3.25667	0.39	NOV
	GrapeSMv01_03g0253	0.973333	4.79667	MSL6
	GrapeSMv01_04g0064	73.14	29.58	HEMH
	GrapeSMv01_16g1065	31.31	5.57	--
	GrapeSMv01_10g0500	8.63333	0.883333	MYB4
	GrapeSMv01_07g1323	8.05667	17.9867	OsI_27296
	GrapeSMv01_02g1016	23.6167	7.01	ITPK5
	GrapeSMv01_19g1092	4.77333	20.5233	PARC
	GrapeSMv01_18g0150	110.377	45.33	AMY2
	GrapeSMv01_12g1526	12.3833	3.25	PME32
	GrapeSMv01_17g0534	4.98667	11.15	BIM1
	GrapeSMv01_11g1258	30.5433	0.11	XTH23
	GrapeSMv01_09g0973	48.2433	16.3333	SDF2
	GrapeSMv01_02g0298	16.7633	1.33667	AS
	GrapeSMv01_14g0566	6.09	12.34	UGT83A1
	GrapeSMv01_05g0871	55.91	17.0267	MYB15
	GrapeSMv01_10g0708	6.58	17.8467	ROMT
	GrapeSMv01_12g0556	30.87	6.69	--
	GrapeSMv01_18g0507	9.18	0.57	PHI-1
	GrapeSMv01_11g0179	111.643	41.1433	--
	GrapeSMv01_17g0596	78.75	27.7467	At1g18980
	GrapeSMv01_04g1293	62.1967	29.9133	At3g51120
	GrapeSMv01_08g1056	1.77333	6.01333	PK1
	GrapeSMv01_08g1765	35.8967	13.04	MTPC2
	GrapeSMv01_08g0991	40.9433	17.26	SCL9
	GrapeSMv01_17g0210	32.2033	4.97667	NUDT17
	GrapeSMv01_13g0141	26.96	7.93667	--
	GrapeSMv01_07g1381	27.8567	5.02333	EXL2
	GrapeSMv01_17g0427	12.6967	33.8633	--
	GrapeSMv01_12g0359	245.007	110.37	At4g28400
	GrapeSMv01_03g0315	5.58333	0.24	AATL1
	GrapeSMv01_02g0733	46.9167	15.8567	VAB
	GrapeSMv01_11g1223	18.15	5.42333	--
	GrapeSMv01_04g1104	65.1367	24.2667	DAR1
	GrapeSMv01_01g1390	11.2633	4.25333	Trank1
	GrapeSMv01_18g1016	16.9	39.1733	petM
	GrapeSMv01_17g0255	36.3333	12.0433	NMT2
	GrapeSMv01_14g1404	2.92	16.71	HSP26-A
	MSTRG.3812	0.89	3.26667	GLR2.7
	GrapeSMv01_15g1128	11.29	2.26333	PYRD
	GrapeSMv01_16g0887	17.3767	2.43333	VIT_16s0100g01030
	GrapeSMv01_06g1122	2.81	9.48667	--
	GrapeSMv01_18g0292	3.68667	13.5867	--
	GrapeSMv01_08g1822	8.83667	18.0267	IQD14
	GrapeSMv01_06g0525	7.80667	0.73	EXPA4
	GrapeSMv01_02g0492	107.957	38.4233	--
	GrapeSMv01_11g0912	78.6367	31.4167	CER3
	GrapeSMv01_14g1524	30.3367	12.8067	--
	GrapeSMv01_19g0254	74.3167	29.8367	GLCAT14A
	GrapeSMv01_12g1556	119.927	51.1233	--
	GrapeSMv01_02g0326	2.89667	0.333333	ABCC10
	GrapeSMv01_01g0420	12.0667	29.4033	--
	GrapeSMv01_01g1397	3.78	9.65	At5g13770
	MSTRG.392	7.11333	0.553333	--
	GrapeSMv01_08g1829	42.3033	15.33	alg7
	GrapeSMv01_18g2136	25.41	7.83333	--
	GrapeSMv01_11g1174	164.037	67.8867	WRKY11
	GrapeSMv01_17g0769	543.353	264.02	SNAP33
	GrapeSMv01_16g1156	31.79	12.31	SEN1
	GrapeSMv01_10g0415	6.07	1.06667	CRK26
	GrapeSMv01_18g1056	43.6533	18.56	DAR1
	GrapeSMv01_06g0269	24.6167	8.69333	TPST
	GrapeSMv01_04g1251	15.76	3.94667	--
	GrapeSMv01_16g1053	18.93	4.15667	--
	GrapeSMv01_18g1064	40.46	18.0433	rnf-5
	GrapeSMv01_04g1119	26.83	6.94667	At4g34320
	GrapeSMv01_06g0204	58.0533	20.15	ALDH3F1
	GrapeSMv01_11g1228	5.9	16.6133	At5g57480
	GrapeSMv01_05g0609	57.75	22.45	KMS1
	GrapeSMv01_14g0426	29.36	9.51667	eng2
	GrapeSMv01_10g0465	0.816667	7.91667	--
	GrapeSMv01_01g0769	380.82	188.073	--
	GrapeSMv01_07g0042	4.86	0.413333	--
	GrapeSMv01_18g1134	20.41	7.24667	PUB5
	GrapeSMv01_17g0074	30.42	9.89	NOV
	GrapeSMv01_08g0876	23.7133	8.03	ECA4
	GrapeSMv01_04g1124	10.85	2.51333	OST48
	GrapeSMv01_07g0210	85.7167	28.6767	MGS1
	GrapeSMv01_16g1105	60.2867	22.1	MAKR5
	GrapeSMv01_04g1721	20.4733	4.46667	DAO
	GrapeSMv01_13g1799	7.95667	0.46	--
	GrapeSMv01_12g0867	125.917	37.26	PIK-1
	GrapeSMv01_08g0904	39.4167	16.3033	At1g67720
	GrapeSMv01_01g1734	28.66	7.71667	--
	GrapeSMv01_05g0658	32.79	12.78	FLZ8
	GrapeSMv01_Sca0050	11.9	3.09	SWEET2
	GrapeSMv01_12g1476	7.93	2.59333	GXM1
	GrapeSMv01_04g1222	22.19	0.78	SAMT
	GrapeSMv01_08g1571	198.33	94.6733	LIGB
	GrapeSMv01_07g1938	2.83667	0.306667	CES101
	GrapeSMv01_04g0111	10.8	2.11333	B3GALT12
	GrapeSMv01_14g0818	18.43	6.53333	GPAA1
	GrapeSMv01_19g0778	39.5633	11.87	NMNAT
	GrapeSMv01_01g0570	180.03	72.0733	PCR2
	GrapeSMv01_18g0132	183.047	82.3833	4CLL5
	GrapeSMv01_17g0393	19.3367	43.2433	--
	GrapeSMv01_07g0657	33.1	4.69	MAPKKK20
	GrapeSMv01_15g1143	88.2033	39.7433	FTIP3
	GrapeSMv01_01g1007	490.163	174.283	TRX2
	GrapeSMv01_02g0514	22.25	8.80667	PAT14
	GrapeSMv01_01g1252	26.1233	3.92333	--
	GrapeSMv01_11g0119	16.98	4.84667	BRXL4
	GrapeSMv01_15g0017	21.7033	7.94	RGA3
	GrapeSMv01_16g1040	5.72333	12.42	HSP83A
	GrapeSMv01_05g0481	4.81333	11.83	DRB2
	GrapeSMv01_07g0981	7.27	0.4	ERF3
	GrapeSMv01_07g1446	22.13	7.89667	EZA1
	GrapeSMv01_04g1625	9.31	2.1	LECRK3
	GrapeSMv01_05g1327	5.27	14.33	UGT74E2
	GrapeSMv01_18g0634	20.1033	3.72333	VIT_01s0010g01180
	GrapeSMv01_03g1300	147.777	61.4	VQ22
	GrapeSMv01_19g1165	11.11	27.59	PARC
	GrapeSMv01_01g0564	11.2633	1.57333	PME6
	GrapeSMv01_03g0451	5.99	1.46	At2g16250
	GrapeSMv01_03g0435	7.00333	16.22	AS1
	GrapeSMv01_08g1013	0.493333	4.22333	SRG1
	GrapeSMv01_02g0189	32.6967	13.6933	WDR44
	GrapeSMv01_07g0019	6.76333	17.8167	--
	GrapeSMv01_01g0691	61.7067	27.0367	UVR8
	GrapeSMv01_18g0482	14.0833	3.71	STP5
	GrapeSMv01_03g0265	15.74	5.51667	DTX45
	GrapeSMv01_04g0930	12.2367	1.83667	--
	GrapeSMv01_18g0401	21.4367	3.34667	--
	GrapeSMv01_14g0474	17.8267	6.44667	PI4KG7
	GrapeSMv01_02g0148	108.53	51.8267	CAND7
	GrapeSMv01_10g0608	56.6967	23.0033	CRPK1
	GrapeSMv01_04g1405	16.54	4.74667	BBD2
	GrapeSMv01_11g1247	1.76	7.34333	--
	GrapeSMv01_09g0275	3.96667	14.25	--
	GrapeSMv01_05g1525	7.07667	14.2667	--
	GrapeSMv01_05g0784	1.53333	8.43667	AHL20
	GrapeSMv01_09g0195	7.06667	0.623333	At3g44060
	GrapeSMv01_01g0810	29.1833	9.16333	--
	GrapeSMv01_04g0414	15.0767	5.88	HSP70-17
	GrapeSMv01_03g0056	105.237	50.8	RF2b
	GrapeSMv01_10g0942	4.39333	0.83	FLS2
	GrapeSMv01_06g0556	45.9767	19.9767	TOC75-3
	GrapeSMv01_16g0895	14.7067	2.11333	GSVIVT00005194001
	GrapeSMv01_16g0665	92.4867	26.5867	PMEI11
	GrapeSMv01_04g1538	11.8633	1.23333	PME51
	GrapeSMv01_16g0946	35.15	11.5467	HIPP39
	GrapeSMv01_11g0288	10.06	2.09333	--
	GrapeSMv01_12g0102	1.23667	3.34667	Fancd2
	GrapeSMv01_13g0621	9.36333	1.96333	SCPL27
	GrapeSMv01_03g0288	75.9633	26.35	CHIT1B
	GrapeSMv01_11g0277	9.06667	0.993333	Os06g0561000
	GrapeSMv01_07g1328	10.3167	21.3467	EID1
	GrapeSMv01_04g1571	22.9167	8.01667	LECRK3
	GrapeSMv01_03g0921	32.1033	12.1767	--
	GrapeSMv01_07g1924	17.0733	5.44333	CES101
	GrapeSMv01_07g1101	11.32	3.6	IDM1
	GrapeSMv01_07g2126	6.43	15.28	dhmA
	GrapeSMv01_08g0476	7.69333	1.36333	PUB16
	GrapeSMv01_09g0773	62.6	22.17	--
	GrapeSMv01_08g1747	41.4733	13.15	Ahsa1
	GrapeSMv01_10g0745	0.903333	5.99333	At5g45920
	GrapeSMv01_14g1084	0.38	10.3067	FTSH6
	GrapeSMv01_08g0891	1.50333	4.69667	PP2C38
	GrapeSMv01_04g0722	76.0333	31.1733	At2g24580
	GrapeSMv01_05g0490	21.1167	4.78667	TULP3
	GrapeSMv01_17g0212	31.8267	7.05	--
	GrapeSMv01_05g1636	34.93	12.22	CTL2
	GrapeSMv01_03g1306	76.23	32.92	GT3
	GrapeSMv01_02g1240	22.23	6.95333	At1g31850
	GrapeSMv01_01g1206	3.71667	0.536667	BAM3
	GrapeSMv01_02g0272	20.0667	3.17667	--
	GrapeSMv01_06g0299	66.3333	29.52	At5g60570
	GrapeSMv01_09g0585	6.10667	0.68	RPS5
	GrapeSMv01_12g0772	57.3533	21.0333	WNK11
	GrapeSMv01_07g0346	4.81333	11.6867	At5g65490
	GrapeSMv01_02g0325	62.4467	25.34	VATE
	GrapeSMv01_05g1385	52.5367	12.6733	EP3
	GrapeSMv01_18g1438	42.22	13.51	PUB27
	GrapeSMv01_11g0380	46.6133	18.3467	Rca
	GrapeSMv01_09g1060	2.88667	6.85333	ABCC13
	GrapeSMv01_13g0923	15.5333	4.25	--
	GrapeSMv01_06g1204	20.4433	6.35667	UGT87A1
	GrapeSMv01_14g1796	1.03667	2.89667	XI-E
	GrapeSMv01_06g1545	21.9433	6.59333	At2g27500
	GrapeSMv01_13g0229	37.4233	16.55	PRR73
	GrapeSMv01_03g0689	131.12	61.1133	CBSX1
	GrapeSMv01_06g1351	1.28	3.54	RPPL1
	GrapeSMv01_10g0029	75.6567	32.8533	OST3B
	GrapeSMv01_06g0115	11.5733	2.78	pod
	GrapeSMv01_15g0246	6.85667	1.23667	NPC3
	MSTRG.21738	32.42	13.8267	RPV1
	GrapeSMv01_17g0999	10.95	23.3533	TIC32B
	GrapeSMv01_11g0950	30.2833	12.41	SMAX1
	GrapeSMv01_05g1540	1.19667	20.69	--
	GrapeSMv01_01g0199	15.9833	5.05333	EXO84C
	GrapeSMv01_18g1176	48.9233	22.41	--
	GrapeSMv01_13g0503	2.11	16.46	HSP18.2
	MSTRG.6134	44.0133	15.9333	--
	GrapeSMv01_18g0204	80.21	34.6967	At5g64030
	GrapeSMv01_10g1060	6.11	15.0533	MTERF1
	GrapeSMv01_17g0602	35.9367	13.91	GALT6
	GrapeSMv01_19g0627	3.57667	10.8933	WRKY6
	GrapeSMv01_06g1369	14.5167	3.61333	UGT86A1
	GrapeSMv01_01g1586	18.43	3.18	LTPG1
	GrapeSMv01_04g1490	27.43	9.84	MED26C
	GrapeSMv01_14g0330	19.9967	3.99667	msrA
	GrapeSMv01_06g0152	13.38	1.88333	LOX1.5
	GrapeSMv01_09g0015	38.94	13.0767	ATL60
	GrapeSMv01_13g0139	52.5533	21.3033	PRA1B3
	GrapeSMv01_05g0300	15.1733	33.2867	RALFL33
	GrapeSMv01_07g1506	9.01667	0.333333	--
	GrapeSMv01_11g0671	20.44	4.34667	--
	GrapeSMv01_12g0864	6.16	12.75	At3g27390
	GrapeSMv01_10g0390	6.76667	1.72	RPP13
	GrapeSMv01_10g0410	5.52333	0.596667	CRK25
	GrapeSMv01_19g1129	44.9167	91.21	IF2CP
	GrapeSMv01_19g0674	3.09333	19.6833	--
	GrapeSMv01_14g0638	100.9	49.06	MPT3
	GrapeSMv01_16g1355	335.837	147.387	CYTB5-E
	GrapeSMv01_13g0177	120.23	40.3133	--
	GrapeSMv01_05g0864	541.92	262.74	PHT1-4
	GrapeSMv01_07g0982	20.5967	6.24667	WRKY21
	MSTRG.14154	18.23	5.22333	RPV1
	GrapeSMv01_06g0237	42.2367	15.83	RER4
	GrapeSMv01_07g0435	13.91	3.46	TUBA
	GrapeSMv01_06g1450	2.03333	5.21	At3g44820
[truncated: 3,793 more rows]

## Sheet: Table S8
	Table S8. Information of DEGs detected in Dro vs. Dro_ALA
	Gene ID	Dro_fpkm	Dro_ALA_fpkm	Symbol
	GrapeSMv01_08g1448	175.54	8.29	METK3
	GrapeSMv01_03g0744	24.66	145.993	--
	GrapeSMv01_03g0590	115.997	2.77333	At5g05600
	GrapeSMv01_16g0911	214.13	27.7067	STS
	GrapeSMv01_14g1385	286.953	40.8467	GRDP2
	GrapeSMv01_05g0112	121.807	11.5867	HGN1
	GrapeSMv01_18g0108	2.75	65.8567	CYP87A3
	GrapeSMv01_18g1451	890.193	170.627	--
	GrapeSMv01_01g0274	70.9867	17.8733	ALA9
	GrapeSMv01_02g0157	19.4633	135.753	CYP78A3
	GrapeSMv01_11g0578	1647.62	433.31	RFS6
	GrapeSMv01_19g0901	34.0367	197.517	FBA5
	GrapeSMv01_03g0534	137.053	31.0367	JGB
	GrapeSMv01_07g1848	79.4667	3.26333	SDI1
	GrapeSMv01_07g1032	133.493	41.5667	ACA12
	GrapeSMv01_05g1661	145.293	32.13	PIN1D
	GrapeSMv01_14g0047	57.33	7.69667	At3g27150
	GrapeSMv01_02g1304	96.5633	22.1667	PAE8
	GrapeSMv01_01g0846	168.22	32.51	SRO2
	GrapeSMv01_10g1403	179.683	30.1	--
	GrapeSMv01_18g0679	241.34	37.0367	--
	GrapeSMv01_08g1178	1069.74	236.723	NHL10
	GrapeSMv01_04g0745	170.34	27.3133	NHL6
	GrapeSMv01_12g1248	165.287	18.2367	--
	GrapeSMv01_17g1051	45.2133	1.55667	Os07g0688000
	GrapeSMv01_14g1714	256.777	50.38	OASA1
	GrapeSMv01_16g0071	69.8367	9.78667	PAL
	GrapeSMv01_16g0897	74.74	9.04667	VINST1
	GrapeSMv01_18g1598	653.897	0.453333	LAC14
	GrapeSMv01_01g0629	124.713	26.9167	PUB21
	GrapeSMv01_14g0120	72.5367	7.87333	At3g27150
	GrapeSMv01_07g0671	139.087	40.6033	HSF24
	GrapeSMv01_12g0473	61.36	8.54333	2022-04-03
	GrapeSMv01_16g0889	65.53	6.74333	GSVIVT00007357001
	GrapeSMv01_10g0796	298.447	78.8833	CAMRLK
	GrapeSMv01_03g0933	181.877	18.4167	PR1B1
	GrapeSMv01_08g1583	1717.64	481.463	RFS2
	GrapeSMv01_16g0906	56.3067	5.17667	VINST1
	GrapeSMv01_16g0885	51.4433	5.46333	VIT_16s0100g01030
	GrapeSMv01_13g1749	85.47	16.79	OFUT20
	GrapeSMv01_18g1446	426.31	89.8133	--
	GrapeSMv01_08g1529	145.547	43.8033	MUCI21
	GrapeSMv01_16g0894	77.45	13.2233	VIT_16s0100g01030
	GrapeSMv01_02g0743	24.5967	138.83	HAT4
	GrapeSMv01_16g0067	43.3567	6.95667	PAL
	GrapeSMv01_14g0662	204.85	45.9667	NAC083
	GrapeSMv01_08g1537	109.31	26.83	HSFB3
	GrapeSMv01_16g0908	66.8233	6.73667	VIT_16s0100g01030
	GrapeSMv01_01g1293	37.1667	6.98	DIM
	GrapeSMv01_02g0119	93.5767	22.9367	COMT1
	GrapeSMv01_12g0113	52.2933	5.54667	TBL43
	GrapeSMv01_08g0793	136.917	16.4033	--
	GrapeSMv01_04g0351	208.607	50.29	ASP3
	GrapeSMv01_02g0637	71.6433	15.8767	RBL2
	GrapeSMv01_01g0997	70.5833	272.847	GSTU17
	GrapeSMv01_11g0010	162.463	37.7833	LKR/SDH
	GrapeSMv01_08g1157	261.55	671.46	LHCB4.1
	GrapeSMv01_14g1418	34.14	7.85	RBOHB
	GrapeSMv01_11g0380	79.23	18.3467	Rca
	GrapeSMv01_16g0910	57.0333	6.42333	VINST1
	GrapeSMv01_18g0228	136.393	37.2567	USP
	GrapeSMv01_01g0659	167.617	25.56	COR2
	GrapeSMv01_18g1227	56.1633	9.07333	GLOX1
	GrapeSMv01_19g0853	107.92	24.3567	AAP7
	GrapeSMv01_03g0044	613.49	1837.44	FBA1
	GrapeSMv01_05g0081	45.88	12.28	COBL7
	GrapeSMv01_04g0621	92.7733	18.46	CM2
	GrapeSMv01_18g0899	50.7567	3.17	At3g50280
	GrapeSMv01_Sca0160	87.7267	17.2967	HMT3
	GrapeSMv01_16g0903	43.04	4.31	STS
	GrapeSMv01_16g0888	55.4	9.59333	GSVIVT00007357001
	GrapeSMv01_11g0179	121.227	41.1433	--
	GrapeSMv01_01g0691	96.9567	27.0367	UVR8
	GrapeSMv01_05g0612	31.6133	3.95333	ACL5
	GrapeSMv01_18g1037	211.037	54.1267	AOS1
	GrapeSMv01_02g0616	220.273	55.3633	TPM-1
	GrapeSMv01_14g1341	187.877	10.9867	DPD1
	GrapeSMv01_05g0734	14.8433	90.7833	AUX22D
	GrapeSMv01_13g0647	80.23	225.55	PIP2-1
	GrapeSMv01_02g0737	88.81	23.75	gfo
	GrapeSMv01_13g0436	42.1867	155.123	RCA
	GrapeSMv01_01g0387	102.02	16.1767	ENDO2
	GrapeSMv01_12g0535	25.5833	6.03333	--
	GrapeSMv01_08g1059	43.94	8.46	RE
	GrapeSMv01_14g1959	105.267	36.8333	--
	GrapeSMv01_02g1340	44.7233	6.37333	--
	GrapeSMv01_18g0895	73.72	15.3367	At3g50280
	GrapeSMv01_10g0587	108.87	26.8033	AS1
	GrapeSMv01_18g0705	17.93	3.84333	CSLC12
	GrapeSMv01_07g1423	219.153	20.54	PLIP2
	GrapeSMv01_08g0867	108.91	31.8	EXO70H1
	GrapeSMv01_06g0429	187.997	57.9733	EXO70H1
	GrapeSMv01_19g1086	81.0067	268.643	PARC
	GrapeSMv01_10g0939	173.24	557.023	CAB40
	GrapeSMv01_14g0967	82.6167	25.8733	--
	GrapeSMv01_09g0983	12.5067	52.6567	CIPK25
	GrapeSMv01_16g0887	35.25	2.43333	VIT_16s0100g01030
	GrapeSMv01_19g0541	462.887	1116.63	THI1-1
	GrapeSMv01_10g0825	139.293	57.9767	PUB17
	GrapeSMv01_07g1568	90.5	39.2867	ABCB11
	GrapeSMv01_06g0681	609.723	220.067	At2g29260
	GrapeSMv01_07g0261	378.12	118.137	UGT85K5
	GrapeSMv01_07g1093	197.87	57.9267	FLZ8
	GrapeSMv01_09g0097	720.577	233.933	RSH3
	GrapeSMv01_01g1076	85	26.0733	SKIP11
	GrapeSMv01_02g1070	35.7667	10.3433	CSLD2
	GrapeSMv01_03g1261	651.22	232.91	--
	GrapeSMv01_09g0090	108.817	43.8633	LOX3.1
	GrapeSMv01_16g0063	19.5433	2.17667	PAL
	GrapeSMv01_16g0069	25.43	3.59667	PAL
	GrapeSMv01_03g0659	58.1833	6.10333	ERF109
	GrapeSMv01_01g0973	58.7667	20.57	RCOM_0699480
	GrapeSMv01_12g0762	161.137	59.8067	At5g35735
	GrapeSMv01_06g0939	30.8733	3.18	LBD15
	GrapeSMv01_12g0486	67.59	11.8067	MAPKKK18
	GrapeSMv01_08g0659	85.14	223.477	CRD1
	GrapeSMv01_10g1318	54.9033	18.43	HAK13
	GrapeSMv01_01g1716	21.8233	68.72	NPF6.1
	GrapeSMv01_14g0748	133.997	42.98	--
	GrapeSMv01_05g1723	15.34	63.6567	UGT75C1
	GrapeSMv01_16g0907	32.51	2.82333	VINST1
	GrapeSMv01_10g0878	71.4867	11.3867	--
	GrapeSMv01_01g1616	74.1833	23.49	DPL1
	GrapeSMv01_02g0976	122.81	40.98	--
	GrapeSMv01_17g0775	66.4433	171.603	BHLH72
	GrapeSMv01_08g1046	99.9	34.5967	--
	GrapeSMv01_13g0041	127.227	41.8633	--
	GrapeSMv01_06g0838	20.13	1.43	ASN1
	GrapeSMv01_18g0171	113.573	284.09	CDSP32
	GrapeSMv01_07g1223	9.00667	39.0933	ROPGAP2
	GrapeSMv01_07g1573	63.4067	13.5433	RL3
	GrapeSMv01_08g1459	13.69	1.22667	XYL2
	GrapeSMv01_07g0272	271.17	94.9	SHKB
	GrapeSMv01_12g1526	23.4467	3.25	PME32
	GrapeSMv01_14g0724	462.637	221.927	LHT1
	GrapeSMv01_04g1115	31.4033	2.35	At2g23790
	GrapeSMv01_16g0892	49.5267	9.96	GSVIVT00004047001
	GrapeSMv01_10g0026	132.927	353.933	THI1-2
	GrapeSMv01_14g0719	191.017	59.49	--
	GrapeSMv01_12g0539	44.0167	10.0067	DSP1
	GrapeSMv01_04g1107	43.1133	11.7333	LYK4
	GrapeSMv01_13g1815	81.29	19.0867	--
	GrapeSMv01_12g0065	34.51	9.74333	APF2
	GrapeSMv01_06g0112	52.6033	3.79	--
	GrapeSMv01_10g0042	60.3767	14.9067	GPT2
	GrapeSMv01_13g0830	62.92	15.8533	OTU4
	GrapeSMv01_05g0776	258.897	103.127	CSLG2
	GrapeSMv01_06g1436	84.43	31.5533	At1g65240
	GrapeSMv01_02g1355	74.9867	226.183	CCD4
	GrapeSMv01_18g0379	23.9033	4.14	B3GALT7
	GrapeSMv01_01g0689	129.763	302.94	PSBY
	GrapeSMv01_16g0483	110.38	32.8533	--
	GrapeSMv01_06g0453	335.353	94.6333	ZAT11
	GrapeSMv01_10g0018	1.20667	22.1633	GA2OX8
	GrapeSMv01_11g0959	41.39	11.2533	CYP73A12
	GrapeSMv01_16g0064	17.8867	2.02667	-
	GrapeSMv01_08g0781	249.593	112.257	PAL
	GrapeSMv01_18g0548	63.6367	16.73	DTX27
	GrapeSMv01_10g0101	26.82	74.31	GDCST
	GrapeSMv01_19g0644	1155.89	2516.59	VTC2
	GrapeSMv01_18g1046	86.5967	213.657	PSBO
	GrapeSMv01_17g0321	62.8833	7.00333	--
	GrapeSMv01_06g0539	54.42	14.11	--
	GrapeSMv01_01g0511	12.4767	41.2433	PIN3
	GrapeSMv01_19g0863	217.49	518.13	ATJ11
	GrapeSMv01_13g0412	16.0433	65.34	RCA
	GrapeSMv01_03g0962	46.0433	126.72	MDHG
	GrapeSMv01_14g0647	113.797	40.6967	At5g13200
	GrapeSMv01_08g0505	131.453	312.08	CRD1
	GrapeSMv01_01g1003	65.8267	27.8567	--
	GrapeSMv01_07g1643	67.09	20.2333	MYB14
	GrapeSMv01_10g0491	14.1267	1.98	At1g11300
	GrapeSMv01_18g1741	112.873	45.7733	ROH1
	GrapeSMv01_11g1116	24.86	5.69333	APO3
	GrapeSMv01_08g0994	216.45	69.0367	--
	GrapeSMv01_19g0906	122.767	319.303	PSAG
	GrapeSMv01_06g0505	1401.13	555.583	--
	GrapeSMv01_13g0163	33.1133	1.13	LBD15
	GrapeSMv01_12g1404	33.73	3.25333	DMP3
	GrapeSMv01_06g1410	94.96	21.56	ZAT5
	GrapeSMv01_Sca0285	129.56	54.7567	SUS2
	GrapeSMv01_10g1232	44.6867	0.23	At1g30700
	GrapeSMv01_06g1324	468.09	952.103	AGT1
	GrapeSMv01_03g0319	12.4	1.11333	Bp10
	GrapeSMv01_06g1413	319.167	127.393	PAO
	GrapeSMv01_05g1387	62.9433	8.29667	EP3
	GrapeSMv01_01g0769	426.47	188.073	--
	GrapeSMv01_13g0039	8.24333	32.6	CYP90A1
	GrapeSMv01_13g1569	27.3467	6.08333	CKX6
	GrapeSMv01_14g0879	42.98	115.113	BCA1
	GrapeSMv01_17g0466	10.6467	40.2333	CHUP1
	GrapeSMv01_02g0155	394.503	160.267	HOX22
	GrapeSMv01_14g0982	62.1367	18.67	GATL9
	GrapeSMv01_07g1357	1603.11	751.903	ARG2
	GrapeSMv01_01g0834	41.2567	7.56	At1g60420
	GrapeSMv01_06g0689	57.5567	4.92333	At2g29260
	GrapeSMv01_02g0569	86.55	26.3933	HPR3
	GrapeSMv01_06g0686	152.703	1.13333	At2g29260
	GrapeSMv01_09g0767	39.1433	87.3367	TPR1
	GrapeSMv01_05g1686	105.14	29.1433	--
	GrapeSMv01_09g0274	140.573	13.8733	--
	GrapeSMv01_10g1327	80.8433	201.817	PSAF
	GrapeSMv01_01g0910	111.79	44.7167	TPS9
	GrapeSMv01_18g1304	39.8967	103.213	PETH
	GrapeSMv01_07g0513	5.18667	20.24	NPY2
	GrapeSMv01_14g0876	139.55	53.1167	--
	GrapeSMv01_16g0890	23.2367	2.06667	GSVIVT00007357001
	GrapeSMv01_16g0904	21.3933	1.28667	STS
	GrapeSMv01_15g0007	201.063	453.453	LHCA3
	GrapeSMv01_17g0322	84.6567	11.6733	--
	GrapeSMv01_05g0184	39.74	5.70333	MYB108
	GrapeSMv01_02g1267	108.057	30.41	AOX1A
	GrapeSMv01_06g1589	59.6767	160.43	PSAO
	GrapeSMv01_13g0174	28.7367	114.897	--
	GrapeSMv01_15g0791	19.14	1.29667	DLO1
	GrapeSMv01_04g0266	42.1433	9.99	GGCT2;2
	GrapeSMv01_09g0669	349.98	152.123	KEG
	GrapeSMv01_04g0205	1.09	15.1467	FDH
	GrapeSMv01_07g1300	389.413	945.31	GSTF8
	GrapeSMv01_06g0331	41.6367	11.93	At5g60370
	GrapeSMv01_12g0064	97.5433	43.9533	At1g06550
	GrapeSMv01_01g1310	7.61	29.4367	CPN60B4
	GrapeSMv01_06g0299	70.4067	29.52	At5g60570
	GrapeSMv01_05g0611	166.413	347.17	psaD
	GrapeSMv01_05g0976	171.313	74.9533	IIL1
	GrapeSMv01_08g1129	38.0333	9.01	SQD2
	GrapeSMv01_15g1009	671.93	321.843	BAG6
	GrapeSMv01_04g0970	77.5733	29.2467	PP2B10
	GrapeSMv01_10g0380	60.79	26.1367	SBT5.4
	GrapeSMv01_10g0702	53.84	19.54	MLO12
	GrapeSMv01_12g0048	122.04	319.647	CAB40
	GrapeSMv01_04g1297	175.393	442.013	FBA2
	GrapeSMv01_18g0371	20.16	4.11	B3GALT7
	MSTRG.12971	7.07	25.36	MIK2
	GrapeSMv01_06g1392	30.3767	9.85333	IRX7
	GrapeSMv01_04g0444	52.1533	3.05333	KCS11
	GrapeSMv01_17g1044	85.45	194.03	TUFB1
	GrapeSMv01_03g1176	34.9667	10.3767	RIBA1
	GrapeSMv01_10g0409	21.1767	5.3	CRK29
	GrapeSMv01_07g0407	194.307	84.24	GRDP1
	GrapeSMv01_05g0607	633.393	289.15	STP13
	GrapeSMv01_17g0134	58.62	13.0333	WRKY75
	GrapeSMv01_01g1077	122.657	40.64	--
	GrapeSMv01_06g0788	48.34	112.257	--
	GrapeSMv01_16g1324	83.0767	179.833	APRR5
	GrapeSMv01_10g1401	186.633	68.5233	--
	GrapeSMv01_15g0848	50.6333	17.3	At2g46620
	GrapeSMv01_08g0745	320.55	160.203	HIPP05
	GrapeSMv01_03g0754	313.823	5.12667	GH3.1
	MSTRG.7308	230.437	109.943	PUMP5
	GrapeSMv01_05g0038	156.487	70.3033	ATL2
	GrapeSMv01_06g1319	37.17	7.77333	At4g18380
	GrapeSMv01_07g1001	58.3233	148.517	AUX28
	GrapeSMv01_19g0254	66.3733	29.8367	GLCAT14A
	GrapeSMv01_08g1656	208.543	72.67	NAC047
	GrapeSMv01_16g1081	40.76	12.2767	UGT88A1
	GrapeSMv01_09g1290	0.81	10.9233	OSCPNY1
	GrapeSMv01_07g1543	123.207	269.997	--
	GrapeSMv01_17g0351	17.2233	2.24667	BC10
	GrapeSMv01_08g0379	13.38	52.3633	AMT3-3
	GrapeSMv01_08g0460	10.2633	0.45	At3g08860
	GrapeSMv01_01g1579	219.43	459.84	CAB7
	GrapeSMv01_01g0279	37.6567	9.88	ICMEL1
	GrapeSMv01_17g0479	17.78	3.61	WAKL8
	GrapeSMv01_06g0839	176.93	84.6933	At2g30020
	GrapeSMv01_01g0960	36.9433	9.49	2MMP
	GrapeSMv01_11g0471	151.787	56.1767	KCS11
	GrapeSMv01_17g0262	257.693	118.627	CML27
	GrapeSMv01_04g0114	210.703	486.01	GDCSP
	GrapeSMv01_10g0175	11.3633	39.1767	--
	GrapeSMv01_02g0453	4.58333	62.6333	EARLI1
	GrapeSMv01_14g0626	19.8433	100.657	LIR1
	GrapeSMv01_10g0364	58.9033	27.2733	SCL13
	GrapeSMv01_01g1667	20.8	2.14333	TIFY9
	GrapeSMv01_15g0794	55.7633	138.3	CURT1B
	GrapeSMv01_04g0592	76.31	22.31	memo1
	GrapeSMv01_07g0260	105.313	43.7033	UGT85K5
	GrapeSMv01_06g1124	264.027	100.143	NHL13
	GrapeSMv01_19g0554	24.23	3.07333	At3g58860
	GrapeSMv01_02g0503	49.9533	117.24	CYP76B6
	GrapeSMv01_09g0319	111.157	43.4767	At3g21360
	GrapeSMv01_02g0769	24.7767	62.9633	NUDT8
	MSTRG.21226	158.647	50.9967	--
	GrapeSMv01_09g0331	49.9667	13.12	--
	GrapeSMv01_18g1662	31.9067	78.3433	TAR3
	GrapeSMv01_14g0331	95.81	31.7067	abhd17b
	GrapeSMv01_09g0326	93.1433	32.1	MODA
	GrapeSMv01_12g1119	127.61	1.79333	WRKY9
	GrapeSMv01_11g0659	1156.39	548.06	--
	GrapeSMv01_02g1266	159.567	73.2167	AOX3
	GrapeSMv01_18g0083	110.147	42.6933	OPR2
	GrapeSMv01_16g0305	82.0733	24.3133	--
	GrapeSMv01_06g0887	312.913	119.743	UGT87A2
	GrapeSMv01_14g1110	31.55	12.2533	GALT1
	GrapeSMv01_18g1353	2.82333	13.3433	At1g21400
	GrapeSMv01_12g0786	349.56	747.993	CAB-151
	GrapeSMv01_08g0440	27.1967	4.53667	SDR2a
	GrapeSMv01_11g0699	14.3767	3.98	CRK35
	GrapeSMv01_11g0070	29.6	10.7567	CCX4
	GrapeSMv01_18g0168	70.6333	154.307	PLDDELTA
	GrapeSMv01_16g1387	87.9733	194.937	PPH1
	GrapeSMv01_18g1080	71.3067	29.9967	LPEAT1
	GrapeSMv01_07g0173	15.69	3.78	At5g66900
	GrapeSMv01_08g0556	19.54	1.28333	SDR2a
	GrapeSMv01_08g1605	17.8267	5.72	F8H
	GrapeSMv01_05g0609	62.4167	22.45	KMS1
	GrapeSMv01_18g2461	76.6933	160.627	LHCB5
	GrapeSMv01_05g0856	76.2267	17.9933	--
	GrapeSMv01_18g0515	22.9133	3.82333	PHI-1
	GrapeSMv01_14g1080	56.1367	20.8167	PFK5
	GrapeSMv01_18g0928	51.3067	118.567	COR27
	GrapeSMv01_10g0384	35.06	83.9867	RFS2
	GrapeSMv01_12g0350	17.8067	51.4367	NAAT1
	GrapeSMv01_02g1010	55.8733	20.9167	TKPR1
	GrapeSMv01_14g1618	4.34667	19.5133	--
	GrapeSMv01_18g1043	28.3567	6.87667	--
	GrapeSMv01_18g1068	109.243	4.4	At2g23790
	GrapeSMv01_13g0062	32.3733	11.8633	CCR3
	GrapeSMv01_13g0845	78.02	36.53	GAT1
	GrapeSMv01_18g0294	191.037	404.27	PSBS
	GrapeSMv01_14g0749	66.2233	25.4533	At5g40670
	GrapeSMv01_08g0573	9.71333	0.206667	At3g08860
	GrapeSMv01_01g1264	6.19	22.0933	CPN60B4
	GrapeSMv01_03g0354	11.2833	32.4067	GLR3.2
	GrapeSMv01_11g1293	97.6033	226.72	COL5
	GrapeSMv01_18g1193	104.36	218.26	--
	GrapeSMv01_13g0674	71.0967	27.9167	At2g39020
	GrapeSMv01_11g0045	63.4233	13.9767	ERF017
	GrapeSMv01_18g1384	18.65	67.5367	TRM1
	GrapeSMv01_07g0136	39.5233	18.9733	WAKL14
	GrapeSMv01_05g0541	27.4133	67.92	GLN2
	GrapeSMv01_05g0074	120.75	42.2167	-
	GrapeSMv01_02g0487	70.9767	155.16	fusA2
	GrapeSMv01_07g1733	14.53	47.6233	IAA12
	GrapeSMv01_07g0538	59.5833	156.587	KAI2
	GrapeSMv01_18g1879	8.94333	0.66	LAC9
	GrapeSMv01_08g0720	101.513	50.0667	MED26B
	GrapeSMv01_12g1283	85.0567	41.7967	--
	GrapeSMv01_17g0499	61.65	28.7367	ENO1
	GrapeSMv01_18g0950	23.4033	66.1433	BKI1
	GrapeSMv01_14g1273	172.527	346.603	CSP41B
	GrapeSMv01_06g1469	27.2967	9.87333	ADT3
	GrapeSMv01_13g0311	69.7	23.8267	ZAT12
	GrapeSMv01_04g1653	79.0933	13.5	--
	GrapeSMv01_03g1078	52.8033	20.26	HVA22A
	GrapeSMv01_13g0655	7.95	22.6767	ARF18
	GrapeSMv01_19g0769	22.1533	4.39667	BAM4
	GrapeSMv01_15g1081	84.78	31.6867	UBC4
	GrapeSMv01_11g1259	18.7167	1.14333	XTH23
	GrapeSMv01_16g0950	23.32	8.15	-
	GrapeSMv01_04g0522	21.0467	5.87333	--
	GrapeSMv01_05g1470	83.7467	183.627	BBX25
	GrapeSMv01_01g0222	22.32	6.93	--
	GrapeSMv01_01g1339	48.9	18.86	VIT_01s0010g01180
	GrapeSMv01_16g0844	36.95	10.97	ERF026
	GrapeSMv01_11g0290	136.897	62.34	PRO1
	GrapeSMv01_16g0946	36.94	11.5467	HIPP39
	GrapeSMv01_11g0666	47.95	15.4133	--
	GrapeSMv01_03g0389	14.5167	36.35	CESA5
	GrapeSMv01_08g1553	58.28	138.49	CHLH
	GrapeSMv01_10g0795	78.53	37.6667	CIPK12
	GrapeSMv01_15g0960	55.9933	148.837	PYL9
	GrapeSMv01_08g0032	54.72	23.6367	PILS6
	GrapeSMv01_14g0924	9.83667	0.223333	DOX1
	GrapeSMv01_03g1325	71.1567	164.863	TPRP-F1
	GrapeSMv01_12g0703	35.4367	15.5667	-
	GrapeSMv01_04g0263	34.2567	10.1067	ARA1
	GrapeSMv01_16g1261	50.7	25.1167	GLT1
	GrapeSMv01_12g0874	4.49	15.24	AKT2
	GrapeSMv01_08g0766	22.1067	52.25	SIGF
	GrapeSMv01_02g0215	6.12	1.02667	CSLG3
	GrapeSMv01_18g0849	12.4767	1.84333	CYP81Q32
	GrapeSMv01_04g0701	19.3933	54.9067	GLR2.7
	GrapeSMv01_01g0145	34.4967	15.9433	RAN1
	GrapeSMv01_18g1597	10.53	0.47	TT10
	GrapeSMv01_10g0643	47.23	15.1733	UBC24
	GrapeSMv01_03g0542	10.6367	0.673333	CYP82C4
	GrapeSMv01_12g1251	97.3767	4.29	--
	GrapeSMv01_12g0772	51.2467	21.0333	WNK11
	GrapeSMv01_12g1141	54.0867	120.543	GT6
	GrapeSMv01_10g0707	39.6633	11.5233	ROMT
	GrapeSMv01_07g0804	26	70.4033	ABR1
	GrapeSMv01_14g1788	69.15	164.627	psbW
	GrapeSMv01_18g1916	122.533	16.6167	TT10
	GrapeSMv01_14g1562	74.7033	156.42	At1g54780
	GrapeSMv01_19g0689	44.8067	12.74	At1g50590
	GrapeSMv01_18g1620	10.3433	0.436667	TT10
	GrapeSMv01_17g0701	34.3767	83.62	CHLP
	GrapeSMv01_17g0710	21.7867	66.8967	lhcA-P4
	GrapeSMv01_05g0585	33.47	10.69	PNC1
	GrapeSMv01_18g0019	12.3833	45.6	MIZ1
	GrapeSMv01_01g0762	37.3267	79.67	PHT2-1
	GrapeSMv01_15g0755	40.62	9.80667	BAP2
	GrapeSMv01_08g0326	39.7433	16.8833	GT-3B
	GrapeSMv01_15g0441	3.68667	23.0133	HAT4
	MSTRG.11789	84.8433	40.7233	RKF1
	GrapeSMv01_18g0362	22.1633	7.42667	--
	GrapeSMv01_08g1615	173.447	81.5067	--
	GrapeSMv01_02g0527	44.1967	18.65	ACR8
	GrapeSMv01_13g0639	67.6133	24.47	PLP7
	GrapeSMv01_01g0407	10.3967	2.21333	BC10
	GrapeSMv01_01g0975	15	43.9167	KUA1
	GrapeSMv01_18g1438	38.5933	13.51	PUB27
	GrapeSMv01_18g0536	184.41	65.5333	--
	GrapeSMv01_08g1097	50.0567	126.02	TUBB2
	GrapeSMv01_18g1500	46.3733	18.8167	At1g34300
	GrapeSMv01_19g1007	8.86333	32.7667	GA2OX1
	GrapeSMv01_04g0822	34.2867	71.3567	PSY1
	GrapeSMv01_15g0615	3.32333	13.6267	At4g22990
	GrapeSMv01_11g0554	142.423	62.56	At2g25060
	GrapeSMv01_11g0083	36.83	14.4633	RIPK
	GrapeSMv01_16g1033	46.1133	113.223	CA2
	GrapeSMv01_14g1613	152.373	75.63	AHP1
	GrapeSMv01_16g0895	16.5767	2.11333	GSVIVT00005194001
	GrapeSMv01_04g0451	1348.11	243.087	--
	GrapeSMv01_02g0243	79.5	160.153	At5g39865
	GrapeSMv01_06g0956	9.57	1.69667	--
	GrapeSMv01_13g0385	94.42	46.2367	TRP4
	GrapeSMv01_16g0070	10.2867	1.47	PAL
	GrapeSMv01_18g0167	174.673	366.827	PETE
	GrapeSMv01_19g0674	94.1133	19.6833	--
	GrapeSMv01_11g0296	62.64	27.0933	VPS15
	GrapeSMv01_09g0653	60.0567	166.383	At3g15810
	GrapeSMv01_16g1247	20.43	50.0667	LRK10
	GrapeSMv01_17g0935	22.83	6.15	SRO5
	GrapeSMv01_04g1667	117.29	254.57	PSAN
	GrapeSMv01_01g0833	20.1767	4.50333	At1g60420
	GrapeSMv01_11g0386	5.52	25.7667	HSFC1
	GrapeSMv01_12g1249	122.367	3.9	--
	GrapeSMv01_17g0972	21.3067	51.3633	CRK42
	GrapeSMv01_07g0531	22.0533	52.6167	CGLD27
	GrapeSMv01_14g1208	73.0233	165.853	PAE12
	GrapeSMv01_05g1515	56.5233	27.1433	DDB_G0270580
	GrapeSMv01_13g0563	47.95	13.9933	PXN
	MSTRG.11788	63.0533	28.2067	At1g07650
	GrapeSMv01_18g1152	21.78	6.33333	MAN7
	GrapeSMv01_01g1115	19.73	3.84333	RNS1
	GrapeSMv01_10g1445	12.3333	1.27333	tmem53-a
	GrapeSMv01_06g0418	41.8767	10.44	--
	GrapeSMv01_14g1089	30.8467	0.97	AVT1I
	GrapeSMv01_08g1091	148.58	69.1433	--
	GrapeSMv01_13g0177	113.15	40.3133	--
	GrapeSMv01_02g0150	39.3467	93.9333	D27
	GrapeSMv01_15g0563	17.6333	2.82	PECS-2.1
	MSTRG.1268	30.8133	7.51667	SERK1
	GrapeSMv01_05g1503	4.69667	20.4767	GUN4
	GrapeSMv01_11g0671	21.71	4.34667	--
	GrapeSMv01_07g1571	10.91	1.88667	TPK5
	GrapeSMv01_13g0154	27.9633	8.53667	AVT6C
	GrapeSMv01_11g1110	20.5433	46.32	CIA2
	GrapeSMv01_01g0492	12.0933	1.84333	GLCAT14A
	GrapeSMv01_01g0756	4.01	14.6833	At1g67900
	GrapeSMv01_16g1326	6.01667	18.74	SBT3.3
	GrapeSMv01_13g0352	101.453	49.2567	--
	GrapeSMv01_06g1037	14.6467	2.61333	PUB24
	GrapeSMv01_13g0183	51.88	19.3567	--
	GrapeSMv01_01g0952	23.0967	8.05667	ILL1
	GrapeSMv01_10g1105	89.9067	253.987	PSAK
	GrapeSMv01_03g0631	40.4633	87.2333	CXE2
	GrapeSMv01_07g0327	190.287	79.7367	--
	GrapeSMv01_09g0411	21.58	6.02667	BAC2
	GrapeSMv01_03g0291	22.3667	6.16667	EXLA2
	GrapeSMv01_08g0408	71.45	30.6	PFE2
	GrapeSMv01_14g1178	15.86	5.21333	PHO1
	GrapeSMv01_15g0032	39.09	83.7633	SIGB
	GrapeSMv01_05g0189	492.39	27.6033	GOLS2
	GrapeSMv01_08g0703	5.80333	20.3633	NPF3.1
	GrapeSMv01_13g1774	62.54	30.3633	LECRK3
	GrapeSMv01_13g0519	30.1133	9.80667	UGT709C2
	GrapeSMv01_12g0079	18.4733	2.55667	At1g14600
	GrapeSMv01_03g1168	64.2733	31.7633	PYD3
	GrapeSMv01_06g0385	12.8733	30.85	RAP2-7
	GrapeSMv01_02g0293	74.9233	27.8567	WRKY53
	GrapeSMv01_13g0632	32.73	70.5133	LHCA1
	GrapeSMv01_04g0079	25.9567	6.49333	CBL10
	GrapeSMv01_19g0996	8.95	24.8367	CYP72A225
	GrapeSMv01_08g1371	25.58	54.6267	At2g36630
	GrapeSMv01_Sca0176	63.1167	24.2433	HACL
	GrapeSMv01_02g0117	69.1067	2.07667	DLO2
	GrapeSMv01_16g0900	59.4633	4.02667	VINST1
	GrapeSMv01_11g0894	169.227	76.2233	SAMDC
	GrapeSMv01_18g1321	10.2067	30.4067	rpa12
	GrapeSMv01_03g0186	42.2367	92.47	MSI3
	GrapeSMv01_01g1736	6.73667	1.58	RBOHC
	GrapeSMv01_02g0966	56.33	151.58	GDCSH
	GrapeSMv01_18g1194	37.6567	15.46	RD21B
	GrapeSMv01_03g0662	17.7	48.3133	CYP707A1
	GrapeSMv01_09g0520	19.3533	6.2	PDR1
	GrapeSMv01_03g0587	44.96	15.29	At5g05600
	GrapeSMv01_18g0246	13.4567	1.24667	At1g11050
	GrapeSMv01_08g0382	29.4367	11.9267	AMT2
	GrapeSMv01_08g1843	38.35	16.9733	SDP1
	GrapeSMv01_08g0589	14.7767	3.88	PUB16
	GrapeSMv01_03g0435	2.93	16.22	AS1
	GrapeSMv01_02g0786	11.38	1.9	At4g16820
	MSTRG.9838	18.32	6.93667	--
	GrapeSMv01_07g0861	23.9233	52.0867	UVR8
	GrapeSMv01_04g1489	30.2367	6.65667	MO2
	GrapeSMv01_14g0663	18.0367	3.44333	GDPD1
	GrapeSMv01_06g0812	14.11	4.60333	At5g58730
	GrapeSMv01_08g0814	35.0867	15.9333	P58IPK
	GrapeSMv01_02g0240	7.2	20.3067	ARF9
	GrapeSMv01_01g1743	9.82	0.9	Os04g0403701
	GrapeSMv01_06g1344	738.827	64.5267	VIT_06s0061g00120
	GrapeSMv01_07g0527	22.6067	5.46	ACBP3
	GrapeSMv01_04g0189	16.02	4.47	FAP2
	GrapeSMv01_03g0976	36.4233	17.61	HEMA1
	GrapeSMv01_05g0778	21.13	8.64	CSLG2
	GrapeSMv01_01g0109	6.43	0.84	RPM1
	GrapeSMv01_06g0611	39.16	13.2933	PHOS32
	GrapeSMv01_14g0822	24.5467	12.0867	--
	GrapeSMv01_03g0058	30.39	64.6967	ASE2
	GrapeSMv01_06g0138	16.17	3.96333	LECRK3
	GrapeSMv01_11g0543	162.64	346.053	--
	GrapeSMv01_01g0207	81.6767	27.9133	--
	GrapeSMv01_13g0275	24.87	11.5933	SULTR4;2
	GrapeSMv01_18g0056	20.65	45.48	PMI1
	GrapeSMv01_18g0674	29.8467	67.5867	TUBA1
	GrapeSMv01_13g0860	1.61	6.52333	PDR2
	GrapeSMv01_15g0606	163.887	69.86	BEN1
	GrapeSMv01_03g0900	4.96667	16.2767	EGY3
	GrapeSMv01_16g1195	150.83	72.9	PP2C51
	GrapeSMv01_05g0522	12.1033	3.20333	--
	GrapeSMv01_08g0857	12.3567	1.82667	--
	GrapeSMv01_08g1554	61.0067	148.173	CHLH
	GrapeSMv01_12g0145	59.7967	0.593333	At5g44400
	GrapeSMv01_04g0673	3.69667	17.2967	At5g10770
	GrapeSMv01_07g0075	27.9733	65.5367	--
	GrapeSMv01_18g1153	53.7367	26.5633	AGPS1
	GrapeSMv01_Sca0045	20.3033	56.3333	CAB40
	GrapeSMv01_16g0902	11.6167	0.673333	VINST1
	GrapeSMv01_03g0381	24.3033	4.09667	--
	GrapeSMv01_13g1566	10.5433	3.46333	ACA11
	GrapeSMv01_16g0966	50.0667	22.64	TUBB1
	GrapeSMv01_03g0583	101.45	13.37	MES10
	GrapeSMv01_03g0780	33.2433	13.1967	At3g19553
	GrapeSMv01_10g1016	3.08667	12.86	OSCBPY
	GrapeSMv01_01g0525	4.67667	18.9467	SULTR3;3
	GrapeSMv01_01g0774	3.08	9.88333	--
	GrapeSMv01_16g0150	17.7733	7.96	CSLD3
	GrapeSMv01_01g0587	20.4167	6.67	NUDT18
	GrapeSMv01_07g2171	26.5933	10.7833	CCR4
	GrapeSMv01_14g1231	11.9767	1.76333	PDK
	GrapeSMv01_19g0299	57.1067	22.91	DAAT
	GrapeSMv01_03g0593	169.517	76.0767	MES10
	GrapeSMv01_16g0223	10.25	0.363333	GDH
	GrapeSMv01_07g0095	22.0667	9.71667	GLU3
	GrapeSMv01_08g0627	109.277	53.09	ATPK2
	GrapeSMv01_12g0710	63.6467	29.03	ENT3
	GrapeSMv01_18g1288	93.1467	40.5633	FHT
	GrapeSMv01_05g1410	7.27333	31.6233	--
	GrapeSMv01_08g0291	14.8833	5.53	CPK1
	GrapeSMv01_09g0512	5.34667	0.926667	PDR1
	GrapeSMv01_18g0158	6.04667	21.3967	HMGB9
	GrapeSMv01_10g0499	20.4533	45.0033	PCR8
	GrapeSMv01_09g0014	19.1567	41.2767	--
	GrapeSMv01_14g1725	21.9833	7.35667	WNK1
	GrapeSMv01_15g1063	117.057	38.32	LEA14-A
	MSTRG.4580	53.77	3.01667	GOLS1
	GrapeSMv01_13g1659	87.1167	199.143	PSBT
	GrapeSMv01_18g0229	31.5033	72.3967	ndhM
	GrapeSMv01_01g0767	46.0333	20.18	ABCB26
	GrapeSMv01_01g0224	14.83	48.3433	--
	GrapeSMv01_18g0839	22.9567	10.8833	At3g47570
	GrapeSMv01_01g0795	20.7	43.6867	NRT2.5
	GrapeSMv01_14g1272	138.1	294.41	GOLS2
	GrapeSMv01_04g1235	22.2133	10.9433	RPP13L4
	MSTRG.21802	37.63	12.84	--
	GrapeSMv01_08g1449	38.8133	4.32	Os04g0560200
	GrapeSMv01_03g0509	18.3733	38.9367	TIC62
	GrapeSMv01_11g0502	5.9	1.19333	--
	GrapeSMv01_06g0983	13.1733	27.51	At1g06840
	GrapeSMv01_06g0567	26.48	60.2433	PTAC16
	GrapeSMv01_07g1065	13.2167	0.223333	NEK2
	GrapeSMv01_19g0205	12.5967	4.64	wdr44
	GrapeSMv01_18g0413	20.4533	5.69	HIPP23
	GrapeSMv01_16g1220	0.553333	6.72667	LRK10
	GrapeSMv01_05g0583	16.0633	36.4	ADG2
	GrapeSMv01_16g1347	60.8033	21.1033	SAUR32
	GrapeSMv01_08g0302	38.8767	12.94	PUB23
	GrapeSMv01_06g0099	172.793	61.62	DIR7
	GrapeSMv01_16g0001	3.33667	13.5467	ABCG11
	GrapeSMv01_01g1476	35.4833	11.2033	yuiD
	GrapeSMv01_16g0713	23.4	59.6967	LRK10
	GrapeSMv01_06g1391	18.7367	0.08	XTH32
	GrapeSMv01_04g0272	29.34	9.83333	--
	GrapeSMv01_17g0627	7.25333	21.0967	NPF4.6
	GrapeSMv01_06g0101	50.7933	12.02	DIR7
	GrapeSMv01_11g0229	9.76667	27.6467	--
	GrapeSMv01_12g1547	33.2933	71.8833	At5g49770
	GrapeSMv01_08g1817	184.43	7.97667	GNS1
	GrapeSMv01_01g0968	33.97	15.35	GATL9
	GrapeSMv01_14g0756	46.4167	21.89	At3g27390
	GrapeSMv01_18g1054	8.80333	1.51	IP5P11
	GrapeSMv01_09g0386	12.8967	31.6133	--
	GrapeSMv01_08g0792	12.31	27.22	ARF18
	GrapeSMv01_18g0516	21.7467	6.47	EXL2
	GrapeSMv01_12g1039	20.42	49.8233	CAP10A
	GrapeSMv01_04g0318	13.5	4.24	At5g03795
	GrapeSMv01_10g0269	66.2533	165.883	--
	GrapeSMv01_06g1031	3.12333	15.6167	At5g22090
	GrapeSMv01_06g0135	36.2167	74.2367	LECRK3
	GrapeSMv01_02g0515	1.90667	9.01	IRKI
	GrapeSMv01_10g0811	21.0967	3.59	--
	GrapeSMv01_05g0859	28.29	6.06333	--
	GrapeSMv01_07g0657	31.6567	4.69	MAPKKK20
	GrapeSMv01_12g1552	8.58333	19.33	FRO7
	GrapeSMv01_12g0329	96.51	27.46	GRXC9
	GrapeSMv01_13g1707	22.8833	51.4733	At3g63540
	GrapeSMv01_01g1018	41.1433	20.2867	NPF4.6
	GrapeSMv01_04g1614	7.24333	0.473333	PUB27
	GrapeSMv01_07g1060	64.16	0.276667	CLH1
	GrapeSMv01_07g0712	19.1	6.44667	AAO
	GrapeSMv01_13g1830	29.9867	0.493333	--
	GrapeSMv01_08g1447	34.2367	15.3833	FLAD1
	GrapeSMv01_13g0512	15.8467	4.27	UGT709C2
	GrapeSMv01_17g0584	22.34	59.8067	--
	GrapeSMv01_07g1849	13.73	2.55333	SDI1
	GrapeSMv01_10g1066	7.15333	18.3	ARF6
	GrapeSMv01_08g0215	25.33	11.5533	BACOVA_02659
	GrapeSMv01_11g0221	52.0533	8.23667	BGAL1
	GrapeSMv01_11g0238	6.21667	19.27	--
	GrapeSMv01_15g0970	372.06	0.001	ANR
	GrapeSMv01_07g0444	19.7967	43.4833	HAT22
	GrapeSMv01_06g0673	22	50.3067	PTAC16
	GrapeSMv01_14g0993	13.4033	4.21667	--
	GrapeSMv01_19g0062	11.8833	0.64	GH3.6
	GrapeSMv01_18g0512	17.0333	37.9933	UGT85A23
	GrapeSMv01_08g1440	12.9367	31.1533	ACR10
	GrapeSMv01_08g0973	30.7433	13.6467	PLL5
	GrapeSMv01_11g0719	12.1233	29.3067	PRCP
	GrapeSMv01_04g1298	34.2867	92.7333	ALDP
	GrapeSMv01_18g1599	77.7333	0.18	TT10
	GrapeSMv01_11g1241	16.8067	2.63333	--
	GrapeSMv01_05g1320	13.0633	28.9067	ILK1
	GrapeSMv01_08g1775	11.35	5.28667	LAC11
	GrapeSMv01_10g0637	9.95	27.5067	At5g22620
	GrapeSMv01_15g1129	5.32	14.9367	At3g61320
	GrapeSMv01_05g0527	62.3	24.3367	MSRB5
	GrapeSMv01_18g1930	15.1267	4.49333	copb2
	GrapeSMv01_19g1109	20.3633	45.6033	CYP72A225
	GrapeSMv01_06g0680	40.9267	14.3967	At2g29260
	GrapeSMv01_18g1077	6.58333	0.463333	GT5
	GrapeSMv01_13g1678	11.3	36.5467	RBCX2
	GrapeSMv01_15g1183	17.3867	5.85333	--
	GrapeSMv01_18g1394	169.507	45.0567	ADH1
	GrapeSMv01_07g0487	10.1933	1.32333	--
	GrapeSMv01_06g1409	23.2433	56.8133	SODCP
	GrapeSMv01_06g0714	79.1333	36.2633	--
	GrapeSMv01_12g1128	38.0133	81.35	GT6
	GrapeSMv01_09g0658	32.79	66.5833	ADS3
	GrapeSMv01_18g0424	8.16667	25.2367	FLZ6
	GrapeSMv01_07g2034	16.7433	4.76333	OXI1
	GrapeSMv01_05g0846	58.7933	18.2667	--
	GrapeSMv01_11g0662	5.83333	20.82	ZNRF3
	GrapeSMv01_18g0905	13.45	3.72	SPT
	GrapeSMv01_18g0860	1.30667	6.98667	PK1
	GrapeSMv01_01g0580	7.23667	0.873333	PDLP6
	GrapeSMv01_04g1678	3.59	14.12	UGT29
	GrapeSMv01_02g0485	7.59333	0.18	bVPE
	GrapeSMv01_19g0156	18.18	47.6333	CAB13
	GrapeSMv01_10g0223	19.2167	5.43667	DSP1
	GrapeSMv01_05g1097	5.6	1.76333	DDB_G0267514
	GrapeSMv01_16g0068	5.60333	0.773333	PAL
	GrapeSMv01_03g0778	57.4433	25.5367	DDB_G0277335
	GrapeSMv01_04g1238	22.6233	10.4467	MPK7
	GrapeSMv01_12g1140	18.7133	43.4967	GT6
	GrapeSMv01_18g1672	16.7067	42.83	TAR3
	GrapeSMv01_04g1551	7.84667	0.9	PUB27
	GrapeSMv01_08g0546	15.3467	6.73	--
	GrapeSMv01_07g1342	57.4733	25.5633	CSE
	GrapeSMv01_04g0764	224.93	3.27	ASP
	GrapeSMv01_03g1046	49.9933	16.62	--
	GrapeSMv01_08g0756	18.28	40.5867	UGT86A1
	GrapeSMv01_17g0999	6.34333	23.3533	TIC32B
	GrapeSMv01_02g0714	72.3833	35.6833	PGSIP8
	GrapeSMv01_03g1260	25.2933	5.39667	--
	GrapeSMv01_01g0577	21.81	9.09667	RLK902
	GrapeSMv01_14g1472	14.4167	5.1	LOX1.5
	GrapeSMv01_18g2079	16.7667	6.75333	CCR4
	GrapeSMv01_18g0931	22.5467	47.68	At1g07700
	GrapeSMv01_11g0416	38.7533	12.9867	--
	GrapeSMv01_08g1315	21.22	8.46333	URH1
	GrapeSMv01_10g1030	20.0467	4.84667	TIFY5A
	GrapeSMv01_18g0400	8.38333	0.163333	ALD1
	GrapeSMv01_11g0048	9.07	27.4333	FLZ14
	GrapeSMv01_18g2159	94.0667	43.21	OPR2
	GrapeSMv01_19g0568	23.3333	9.25667	At5g54860
	GrapeSMv01_14g0705	13.9967	35.2333	MTERF5
	GrapeSMv01_17g0956	31.6667	67.8567	apaG
	GrapeSMv01_17g0169	14.88	29.8367	RNJ
	GrapeSMv01_13g0884	12.43	0.406667	--
	GrapeSMv01_08g1102	26.8533	8.11	OFUT28
	GrapeSMv01_17g0616	2.32667	9.7	NPF2.11
	GrapeSMv01_18g0819	7.09	1.71	--
	GrapeSMv01_07g0998	5.77333	0.706667	At2g30550
	GrapeSMv01_09g0060	12.9367	27.2767	KAS2
	GrapeSMv01_16g1210	43.92	93.36	LRK10
	GrapeSMv01_18g1579	5.60333	0.343333	TT10
	GrapeSMv01_03g0507	8.26	21.8533	CCS1
	GrapeSMv01_01g1709	8.58	27.6367	NPF6.1
	GrapeSMv01_18g0475	10.92	2.08667	PHI-1
	GrapeSMv01_07g1552	5.98	1.07333	ASY3
	GrapeSMv01_04g0529	27.2233	58.09	--
	GrapeSMv01_13g1129	7.08333	15.9267	RPV1
	GrapeSMv01_19g0532	6.56	2.41	ABCB15
	GrapeSMv01_04g0634	10.7067	22.83	PGR3
	GrapeSMv01_05g0274	12.0833	4.85	--
	GrapeSMv01_16g1246	13.0433	35.07	LRK10
	GrapeSMv01_17g0270	25.0867	12.2133	MPK9
	GrapeSMv01_02g0774	58.6833	29.2233	ERF1A
	GrapeSMv01_11g0675	20.3167	40.8367	At5g35170
	GrapeSMv01_03g0624	29.13	11.6533	HIDM
	GrapeSMv01_06g1541	11.5667	33.88	BIC1
	GrapeSMv01_12g1253	165.447	6.93667	--
	GrapeSMv01_18g1118	8.57667	25.9267	MAV_2732
	GrapeSMv01_13g0387	17.18	6.68333	SCL14
	GrapeSMv01_10g0379	5.08667	0.473333	SBT5.4
	GrapeSMv01_05g0072	371.12	174.71	-
	GrapeSMv01_06g1547	24.5133	9.48333	CML48
	GrapeSMv01_01g0548	2.31667	7.62333	NMT2
	GrapeSMv01_01g0285	18.2467	72.56	--
	GrapeSMv01_01g1593	43.63	19.7767	--
	GrapeSMv01_08g0851	20.8	8.41	IP5P8
	GrapeSMv01_18g0514	13.4567	3.34	PHI-1
	GrapeSMv01_09g0311	5.39	16.2133	--
	GrapeSMv01_08g0961	10.3367	1.76667	GLCAT14A
	GrapeSMv01_08g0823	8.76333	2.63333	LECRK81
	GrapeSMv01_01g1613	8.17	1.51333	SPL13A
	GrapeSMv01_12g0217	18.1767	6.38667	ASP1
	GrapeSMv01_02g0557	21.3467	51.1467	CCS
	GrapeSMv01_13g1657	24.4967	52.09	ATAB2
	GrapeSMv01_07g1002	17.4433	50.28	AUX22D
	GrapeSMv01_18g0858	0.24	4.10667	PK1
	GrapeSMv01_04g1710	31.8533	15.19	PILS3
	GrapeSMv01_13g0356	18.2867	6.35	GLC1
	GrapeSMv01_05g1540	4.54333	20.69	--
	GrapeSMv01_16g1234	11.17	32.7767	LRK10
	GrapeSMv01_11g0027	182.15	37.2233	SS
	GrapeSMv01_06g0071	19.3833	42.48	At3g13620
	GrapeSMv01_06g0098	110.64	45.1833	DIR19
	GrapeSMv01_09g0015	34.7767	13.0767	ATL60
	GrapeSMv01_14g0292	28.06	7.51333	--
	GrapeSMv01_05g0543	9.65	3.82667	--
	GrapeSMv01_19g1332	2.12333	6.32	SIS8
	GrapeSMv01_03g0765	24.0867	11.12	CYC2
	GrapeSMv01_06g0096	106.707	52.7733	DIR19
	GrapeSMv01_06g0486	8.10667	2.25333	--
	GrapeSMv01_07g0551	9.49667	2.61667	GH3.1
	GrapeSMv01_09g0430	18.4	4.57333	Copb2
	GrapeSMv01_15g0896	21.65	56.15	ARF9
	GrapeSMv01_12g0287	32.8933	11.6667	ATL40
	GrapeSMv01_16g1084	3.90333	15.2633	UGT88B1
	GrapeSMv01_19g0856	37.8133	6.74333	AAP7
	GrapeSMv01_19g0298	116.263	50.6033	At5g53970
	GrapeSMv01_07g1463	22.5133	9.66667	STS1
	GrapeSMv01_07g1555	23.8767	8.39667	Cht10
	GrapeSMv01_17g0711	17.3667	5.46667	EXPA1
	GrapeSMv01_06g0127	1.42	7.81	NPF7.1
	GrapeSMv01_18g0427	8.41667	2.26667	gpmA
	MSTRG.18780	6.78	14.11	EIX2
	GrapeSMv01_12g1052	15.53	3.2	poxN1
	GrapeSMv01_15g0962	20.5667	42.3233	At4g01037
	GrapeSMv01_14g1224	17.0333	7.38333	--
	GrapeSMv01_04g1071	39.12	79.71	--
	GrapeSMv01_18g1890	5.73	0.606667	LAC14
	GrapeSMv01_Sca0532	15.2433	0.67	ABP19A
	MSTRG.15325	5.11333	1.74667	RPV1
	GrapeSMv01_16g1204	7.93667	20.4733	LRK10
	MSTRG.16907	160.357	1.30667	At5g39120
	GrapeSMv01_04g0523	2.93333	10.6167	--
	GrapeSMv01_05g0581	19.1267	8.87667	RHF1A
	GrapeSMv01_13g0123	15.4067	5.98	mipp1
	GrapeSMv01_13g0883	15.0067	0.126667	--
	GrapeSMv01_15g0809	30.29	0.383333	--
	GrapeSMv01_18g2212	19.2767	42.9833	--
	GrapeSMv01_06g0140	122.84	36.3133	BGLU12
	GrapeSMv01_12g0330	16.9533	7.46333	--
	GrapeSMv01_01g0310	10.9767	0.873333	LAR
	GrapeSMv01_16g1203	2.81	10.9433	LRK10
	GrapeSMv01_10g0027	3.56	11.65	At4g21170
	GrapeSMv01_11g0250	41.7967	20.35	At4g29530
	GrapeSMv01_03g0740	11.8467	1.18667	--
	GrapeSMv01_07g0893	3.18	12.24	AMT3-1
	GrapeSMv01_16g1242	2.06333	9.92333	LRK10
	GrapeSMv01_18g1389	20.97	43.65	PPD4
	GrapeSMv01_08g0700	47.3633	4.38667	At5g07050
	GrapeSMv01_05g1170	14.7833	32.3167	GAE6
	GrapeSMv01_10g0240	7.16	0.45	--
	GrapeSMv01_09g1056	10.2833	23.62	PNSB1
	GrapeSMv01_04g0586	18.38	7.22	--
	GrapeSMv01_04g1570	10.1067	3.56	LECRK4
	GrapeSMv01_12g0818	30.8833	69.3167	--
	GrapeSMv01_01g1071	30.45	63.7233	--
	GrapeSMv01_15g1069	13.89	4.17	KPHMT1
	GrapeSMv01_19g0194	6.44333	13.8	CIP7
	GrapeSMv01_19g0643	95.9567	220.363	--
	GrapeSMv01_07g1110	1.44	10.9467	psaD
	GrapeSMv01_18g1957	12.8833	26.7833	RPV1
	MSTRG.9841	4.29	1.77333	RE2
	GrapeSMv01_04g0160	31.09	83.7233	--
	GrapeSMv01_02g0384	6.25667	1.07	ACS1
	GrapeSMv01_01g0551	87.2033	42.1567	--
	GrapeSMv01_06g0235	1.90333	8.10333	At1g51440
	GrapeSMv01_06g0605	62.19	31.05	--
	GrapeSMv01_13g1615	3.13	12.9667	SIGD
	GrapeSMv01_05g1716	4.95333	0.206667	UGT75L6
	GrapeSMv01_13g1420	13.5333	32.0933	RR9
	GrapeSMv01_14g0022	25.2067	11.9967	--
	GrapeSMv01_10g0698	17.1867	6.72667	NAC073
	GrapeSMv01_11g0350	62.0767	28.2467	BHLH68
	GrapeSMv01_02g0570	110.193	29.8967	ANS
	GrapeSMv01_08g0417	9.90667	22.6233	DTX44
	GrapeSMv01_07g0485	4.5	0.0933333	HHP4
	GrapeSMv01_12g0095	9.47667	21.6033	DTX41
	GrapeSMv01_01g0362	10.32	1.74	--
	GrapeSMv01_05g0153	8.01667	18.67	BHLH147
	GrapeSMv01_18g1109	9.63333	2.55333	At4g34480
	GrapeSMv01_05g0511	5.19333	0.69	At5g18840
	GrapeSMv01_10g0645	5.26333	0.166667	--
	GrapeSMv01_14g1072	137.98	34.5233	--
	GrapeSMv01_09g0409	13.5233	6.07	KIN13B
	GrapeSMv01_06g1486	26.78	0.00666667	-
	GrapeSMv01_19g0065	54.09	27.0033	FQR1
	GrapeSMv01_18g1303	13.0333	38.54	ATJ11
	GrapeSMv01_14g1632	8.97667	2.25	EMB3004
	GrapeSMv01_Sca0388	2.62667	13.49	--
	GrapeSMv01_02g0268	19.5033	6.12667	--
	GrapeSMv01_12g1127	12.7433	31.0567	GT3
	GrapeSMv01_04g1200	13.59	32.7567	PPH
	GrapeSMv01_01g0371	6.76667	18.68	COL16
	GrapeSMv01_Sca0300	134.303	64.6967	ARG2
	GrapeSMv01_14g0050	1.92	0.236667	CLC-B
	GrapeSMv01_11g1239	9.56667	0.21	GALT3
	GrapeSMv01_02g0754	9.02	24.0433	ERF039
	GrapeSMv01_13g0005	1.94	8.65333	CYP714A1
	GrapeSMv01_15g0974	3.22	11.5567	AS
	GrapeSMv01_18g0313	20.0933	1.44	At4g08290
	GrapeSMv01_02g0431	55.8233	27.5967	PGSIP8
	GrapeSMv01_16g1361	28.03	56.8667	At4g27700
	GrapeSMv01_11g0553	12.8767	30.17	BCB
	GrapeSMv01_01g1349	26.4633	12.57	OsI_033149
	GrapeSMv01_12g0150	11.3933	3.91333	ASP1
	GrapeSMv01_06g1473	16.5433	36.45	At5g22620
	GrapeSMv01_06g0307	2.41	7.32667	MGP
	GrapeSMv01_16g0225	40.2833	3.89667	GDH
	GrapeSMv01_05g0854	79.96	34.6367	--
	GrapeSMv01_13g0662	23.5267	5.99	SYT3
	GrapeSMv01_11g0379	548.607	205.357	NYC1
	GrapeSMv01_01g1397	2.87333	9.65	At5g13770
	GrapeSMv01_17g0210	22.84	4.97667	NUDT17
	GrapeSMv01_03g1311	11.1667	4.02333	GT3
	GrapeSMv01_03g1074	20.56	8.93667	HVA22A
	GrapeSMv01_05g1652	54.5267	26.9967	PRN2
	GrapeSMv01_06g1277	10.8167	3.38	CLT1
	GrapeSMv01_07g1493	5.77667	0.523333	MYB78
	GrapeSMv01_17g0660	25.0367	8.51333	PME26
	GrapeSMv01_10g0500	5.74	0.883333	MYB4
	GrapeSMv01_08g0030	26.4967	13.0333	--
	GrapeSMv01_04g1244	104.96	46.14	--
	GrapeSMv01_13g0725	120.427	40.87	SPD1
	GrapeSMv01_10g1234	20.4067	9.13	MUR4
	GrapeSMv01_15g1010	52.91	23.3067	SE2
	GrapeSMv01_04g0538	47	8.75667	ACR2
	GrapeSMv01_18g0530	28.0733	9.34667	--
	GrapeSMv01_16g0197	10.3767	4.09333	At2g16790
	GrapeSMv01_03g0318	7.68	20.3267	CAO
	GrapeSMv01_02g0626	13.0833	5.00667	MYB3R4
	GrapeSMv01_01g0896	5.16333	0.736667	XTH33
	GrapeSMv01_16g1243	2.98	12.32	-
	GrapeSMv01_04g0329	11.4867	26.2633	At1g67280
	GrapeSMv01_12g0412	5.05	13.12	ACD6
	GrapeSMv01_01g1394	0.693333	7.58667	VIT_01s0010g01870
	GrapeSMv01_08g0740	24.8667	2.76667	At2g26850
	GrapeSMv01_02g0618	573.83	112.487	TLP
	GrapeSMv01_10g0202	17.3433	5.69	DSP1
	GrapeSMv01_09g0602	20.0133	5.14	--
	GrapeSMv01_19g0227	21.5333	9.30333	--
	GrapeSMv01_17g0219	71.95	22.97	ltnD
	GrapeSMv01_16g0303	40.74	16.41	--
	GrapeSMv01_12g1274	4.14	11.5667	AKT2
	GrapeSMv01_08g1678	14.2433	31.7733	NDF5
	GrapeSMv01_02g0765	40.7967	19.9667	ppt-1
	GrapeSMv01_06g0257	13.7467	4.1	PAL
	GrapeSMv01_18g0089	20.7967	7.15333	PIX13
	GrapeSMv01_08g1636	23.7667	11.3867	algE1
	GrapeSMv01_13g0140	6.20667	0.08	--
	GrapeSMv01_14g0863	5.44	0.08	At1g48100
	GrapeSMv01_Sca0220	17.59	5.26	CRK10
	GrapeSMv01_06g0111	14.4467	5.48667	SINAT2
	GrapeSMv01_08g0409	16.47	34.2467	mcfF
	GrapeSMv01_04g1569	8.42	3.34667	LECRK1
	GrapeSMv01_19g0659	45.6567	20.5733	MPC4
	GrapeSMv01_10g1317	9.78333	3.91667	WAV3
	GrapeSMv01_14g0551	48.4667	23.9333	AFP3
	GrapeSMv01_12g0627	0.633333	3.31	ROC2
	GrapeSMv01_17g0716	1.03667	3.90333	--
	GrapeSMv01_06g0735	8.33	2.59333	BSK5
	GrapeSMv01_02g0631	14.46	6.01333	--
	GrapeSMv01_14g1085	8.98667	25.7933	FTSH6
	GrapeSMv01_04g1008	12.6233	5.86	--
	GrapeSMv01_01g0209	29.9567	11.7467	--
	GrapeSMv01_Sca0448	31.2167	4.42333	VIT_16s0100g00290
	GrapeSMv01_16g0687	8.62	18.35	PPH
	GrapeSMv01_10g0700	2.30667	12.2	ATHB-52
	GrapeSMv01_12g0802	0.883333	6.51667	RLP30
	GrapeSMv01_07g1429	47.3567	21.2733	--
	GrapeSMv01_07g0753	24.77	10.5267	--
	GrapeSMv01_05g0708	3.98667	1.69667	ACA13
	GrapeSMv01_17g0531	9.58	2.45667	UGT89B2
	GrapeSMv01_02g0959	3.23333	10.22	NAC071
	GrapeSMv01_02g0270	22.36	48.4467	ndhS
	GrapeSMv01_14g1774	30.3867	15.13	CPRF2
	GrapeSMv01_07g0969	2.28	7.71333	CYP94A1
	GrapeSMv01_14g0124	4.20333	1.11667	CLC-B
	GrapeSMv01_14g1346	11.4767	4.85	At1g09160
	GrapeSMv01_07g2165	19.0667	40.6433	--
	GrapeSMv01_04g1155	4.91	15.7233	--
	GrapeSMv01_07g2036	14.68	6.35667	At3g25290
	GrapeSMv01_07g1329	12.4067	4.39667	BGLU11
	GrapeSMv01_11g0524	18.6267	42.3933	BSD2
	GrapeSMv01_15g0874	31.7333	1.62333	MYB3
	GrapeSMv01_18g0101	11.07	23.0767	CRP1
	GrapeSMv01_02g0598	27.5733	9.78	DREB1E
	GrapeSMv01_02g0752	5.66667	14.94	CYP72A225
	GrapeSMv01_Sca0131	29.9667	72.2167	FBA1
	GrapeSMv01_02g0211	8.36	20.9633	ABIL3
	GrapeSMv01_15g0994	8.00333	18.84	--
	GrapeSMv01_18g1134	2.41333	7.24667	PUB5
	GrapeSMv01_17g0966	0.553333	3.05	--
	GrapeSMv01_07g1323	36.1533	17.9867	OsI_27296
	GrapeSMv01_16g1050	6.90667	21.41	At5g52780
	GrapeSMv01_16g0949	10.1	20.7267	EIX2
	GrapeSMv01_14g0373	0.2	3.30333	CUT1
	GrapeSMv01_12g0675	1.80333	0.186667	TPS12
	GrapeSMv01_10g0440	0.216667	2.4	TPS7
	GrapeSMv01_06g0622	8.92	3.44	BSK5
	GrapeSMv01_18g0187	44.9233	22.1767	Os01g0794400
	GrapeSMv01_11g0804	3.84667	9.81333	At1g51120
	GrapeSMv01_12g0340	9.87333	21.4433	GLK1
	GrapeSMv01_04g0366	2.00667	11.2433	RD22
	GrapeSMv01_08g0622	43.01	19.87	WRKY70
	GrapeSMv01_01g0369	4.62	0.363333	HMT1
	GrapeSMv01_05g0839	111.39	52.95	--
	GrapeSMv01_04g1488	25.03	11.17	PCAS-1
	GrapeSMv01_13g0855	4.15	10.2333	PDR2
	GrapeSMv01_08g0815	5.5	13.4933	JKD
	GrapeSMv01_11g0476	8.71667	18.93	AKT1
	GrapeSMv01_12g0143	186.773	66.76	CAJ1
	GrapeSMv01_01g0961	22.2433	5.58	--
	GrapeSMv01_17g1262	1.67	6.41333	YSL7
	GrapeSMv01_03g0288	109.697	26.35	CHIT1B
	GrapeSMv01_06g1427	7.02667	16.43	SCPL51
	GrapeSMv01_10g0178	4443.17	867.61	--
	GrapeSMv01_09g0783	18.3	39.58	--
	GrapeSMv01_17g0922	29.21	65.6967	BHLH167
	GrapeSMv01_08g0511	21.26	10.3133	dfr1
	GrapeSMv01_11g0698	7.63	2.05667	SD18
	GrapeSMv01_18g1302	0.79	5.44	-
	GrapeSMv01_09g0519	2.28667	0.516667	PDR1
	GrapeSMv01_08g1119	3.25333	0.516667	ANTR3
	GrapeSMv01_13g0442	13.65	5.27	--
	GrapeSMv01_05g0073	135.79	27.97	PRUA1
	GrapeSMv01_06g0888	18.0933	5.92	UGT87A2
	GrapeSMv01_16g0893	64.4267	8.97333	GSVIVT00004047001
	GrapeSMv01_07g0146	10.2133	4.31667	CYP82C2
	GrapeSMv01_12g1254	134.183	3.97667	--
	GrapeSMv01_07g0652	9.93667	3.61	At5g67130
	GrapeSMv01_18g0448	14.5233	6.56333	ANN1
	GrapeSMv01_18g0494	13.2667	6.32667	At1g22280
	GrapeSMv01_10g1065	6.70667	16.22	--
	GrapeSMv01_08g0246	24.5733	10.3533	At2g38640
	GrapeSMv01_03g0764	6.89667	15.5767	At5g02860
	GrapeSMv01_06g0142	41.0767	9.18333	BGLU12
	GrapeSMv01_13g0376	24.4167	9.08	PP16-1
	GrapeSMv01_11g1253	21.56	6.92333	XTH23
	GrapeSMv01_18g0312	1.15333	6.05	At1g21890
	GrapeSMv01_17g0266	14.02	30.2633	FKBP17-2
	GrapeSMv01_05g1673	29.7733	13.72	Os04g0338000
	GrapeSMv01_18g1420	12.59	4.61333	DOF3.5
	GrapeSMv01_10g0166	1.51333	5.47	SRF8
	GrapeSMv01_02g1211	32.3133	1.94	NIT4B
	GrapeSMv01_16g1235	6.74	18.04	LRK10
	GrapeSMv01_18g1909	4.07333	0.16	TT10
	GrapeSMv01_02g0619	189.47	25.46	tlp
	GrapeSMv01_06g1342	10.7433	23.2567	--
	GrapeSMv01_09g0110	37.5933	1.39333	ABP19A
	GrapeSMv01_10g0403	3.70333	0.44	CRK29
	GrapeSMv01_06g0097	122.823	11.3967	DIR19
	GrapeSMv01_16g0898	13.0533	2.94333	-
	MSTRG.15588	5.53667	2.46667	RGA3
	GrapeSMv01_13g0036	22.74	8.78667	At3g11230
	GrapeSMv01_11g1283	6.94	16.85	F3GT2
	GrapeSMv01_08g1660	36.0067	17.52	NAC087
	GrapeSMv01_07g1793	16.4833	33.1067	PSAE-1
	GrapeSMv01_12g1037	7.34	16.31	BIPP2C1
	GrapeSMv01_02g0792	21.2967	43.72	MO2
	GrapeSMv01_12g0146	7.61	0.0466667	At1g30760
	GrapeSMv01_17g0255	4.68333	12.0433	NMT2
	GrapeSMv01_15g1044	10.0867	20.2967	FRO2
	GrapeSMv01_16g0618	7.69667	22.4367	PEX11B
	GrapeSMv01_05g0769	12.6533	1.48	--
	GrapeSMv01_02g0009	9.03333	2.94	TET10
	GrapeSMv01_11g0411	25.9733	0.556667	SULTR3;5
	GrapeSMv01_08g0431	12.0033	5.6	ARALYDRAFT_321547
	GrapeSMv01_11g0072	17.3233	0.1	At2g05910
	GrapeSMv01_07g1551	0.5	3.24333	PIL15
	GrapeSMv01_18g2285	4.69	1.24333	RUN1
	GrapeSMv01_11g0865	5.8	21.8933	MIK2
	GrapeSMv01_01g1146	0.116667	1.97667	PHO1;H3
	GrapeSMv01_03g0525	1.50333	6.37	ATL65
	GrapeSMv01_12g1414	12.3133	1.64	--
	GrapeSMv01_18g2154	10.0633	2.52667	OPR11
	GrapeSMv01_13g0206	5.31667	1.61667	ARR17
	GrapeSMv01_06g0437	14.9267	6.69333	GLUA2
	GrapeSMv01_16g0616	10.34	1.62333	DLC
	GrapeSMv01_01g0530	19.0767	9.3	--
	GrapeSMv01_07g0658	18.0033	3.58	MAPKKK20
	GrapeSMv01_02g0627	18.0933	9.00667	UGE1
	GrapeSMv01_08g0258	2.23	6.85333	Xyl2
	GrapeSMv01_07g0144	8.98333	3.27	JGB
	GrapeSMv01_11g1158	11.9633	4.27667	PIRL6
	GrapeSMv01_10g1427	7.76333	1.99667	At2g19130
	GrapeSMv01_14g1386	10.7733	3.87	PP2B15
	GrapeSMv01_04g0507	30.2633	0.593333	CXE17
	GrapeSMv01_05g0161	6.42	16.0533	--
	GrapeSMv01_05g0876	12.95	26.4167	tas
	GrapeSMv01_02g1228	16.0367	7.78	AMAT
	GrapeSMv01_16g1065	19.2067	5.57	--
	GrapeSMv01_17g0654	22.4	9.45	VPS29
	GrapeSMv01_06g1354	3.97	9.70667	ABCG15
	GrapeSMv01_14g0396	14.43	29.1333	RBL9
	GrapeSMv01_05g0478	3.45333	12.95	VIT_05s0020g01820
	GrapeSMv01_06g1297	5.27	1.56667	--
	GrapeSMv01_05g0686	4.73667	13.9467	VAB
	GrapeSMv01_04g1067	83.2933	30.29	PPC6-1
	GrapeSMv01_15g0825	15.1	4.82	--
	GrapeSMv01_10g0959	9.01333	20.96	At2g34460
	GrapeSMv01_18g2483	13.8433	29.4233	dhmA2
	GrapeSMv01_08g1632	1.88	6.01333	--
	GrapeSMv01_05g0847	57.6333	24.3233	--
	GrapeSMv01_04g0175	2.22	7.21333	CKX7
	GrapeSMv01_10g0469	47.1433	10.24	At4g27270
	GrapeSMv01_13g0657	1.35667	4.93	EDR2
	GrapeSMv01_08g1670	4.20667	12.8233	GATA9
	GrapeSMv01_05g0947	5.62	2.24	--
	GrapeSMv01_01g0816	20.7667	8.48667	BRG3
	GrapeSMv01_07g1669	6.76333	2.59	FAO2
	GrapeSMv01_04g1668	3.84333	0.686667	GSVIVT00026920001
	GrapeSMv01_01g0722	19.48	8.40667	CYP71B35
	GrapeSMv01_06g0264	4.97	0.2	--
	GrapeSMv01_08g1019	10.4433	21.5667	LECRK41
	GrapeSMv01_13g0661	8.56333	4.11667	WAV3
	GrapeSMv01_03g1337	7.23333	2.75	CRK25
	GrapeSMv01_13g0115	13.74	28.1367	--
	GrapeSMv01_08g0931	8.12333	17.8233	HCF152
	GrapeSMv01_11g0537	31.0233	12.3933	--
	GrapeSMv01_05g1749	8.76667	1.65	XTH15
	GrapeSMv01_05g0097	10.32	2.27333	VEP1
	GrapeSMv01_14g1211	2.83333	6.73667	PIL15
	GrapeSMv01_17g0118	1.94	0.143333	--
	GrapeSMv01_06g1511	4.92667	1.13667	CYP94C1
	GrapeSMv01_07g0378	13.1433	35.7933	CAD
	GrapeSMv01_14g0082	15.01	6.99	YSL6
	GrapeSMv01_08g1822	8.43667	18.0267	IQD14
	GrapeSMv01_01g0427	16.3567	4.27	LTP-2
	GrapeSMv01_10g0481	0.193333	3.11667	At4g27290
	GrapeSMv01_12g0508	13.47	4.60667	yuiD
	GrapeSMv01_06g0574	5.69333	0.136667	--
	GrapeSMv01_05g1568	12.29	6.14333	ACD6
	GrapeSMv01_18g1502	21.27	54.7967	--
	GrapeSMv01_02g0620	8.81	1.09	TLP
	GrapeSMv01_07g1474	3.98333	11.6833	GPAT3
	GrapeSMv01_10g0940	1.92667	9.07333	CAB40
	GrapeSMv01_18g0508	10.1067	1.64333	EXL2
	GrapeSMv01_05g0774	9.53667	0.34	PIIF
	GrapeSMv01_11g1240	7.51667	1.10333	--
	GrapeSMv01_14g0843	13.4733	27.46	NRT2.5
	GrapeSMv01_12g0834	18.9767	8.70333	ABC1K7
	GrapeSMv01_11g1251	4.54	0.203333	XTH23
	GrapeSMv01_02g0299	16.1167	4.90667	--
	GrapeSMv01_17g1201	6.10333	0.49	KTI5
	GrapeSMv01_18g1625	2.14	9.26333	HSP17.9A
	GrapeSMv01_13g0223	30.0033	14.3167	MES17
	GrapeSMv01_06g1194	6.38667	15.0267	tyrP
	GrapeSMv01_06g0162	2.51667	7.63667	IRKI
	GrapeSMv01_08g0146	5.96667	14.0833	PLGG1
	GrapeSMv01_16g1109	3.43333	0.806667	SLAH3
	GrapeSMv01_19g0658	13.76	2.89667	MPC4
	GrapeSMv01_07g1477	0.383333	2.8	LACS1
	GrapeSMv01_03g0532	11.0767	0.0333333	AOS3
	GrapeSMv01_10g0125	27.2133	12.4467	PER42
	GrapeSMv01_06g0894	3.04	8.79667	UGT87A1
	GrapeSMv01_07g1250	6.67667	23.6067	GRXC13
	GrapeSMv01_07g0010	6.30667	15.89	dhmA
	GrapeSMv01_01g0501	5.76	0.85	At1g66480
	GrapeSMv01_15g1170	1.05333	3.51	RPP13
	GrapeSMv01_06g1505	6.76	0.01	-
	GrapeSMv01_09g0317	4.03	11.68	LYK3
	MSTRG.5527	1.03	0.16	RF9
	GrapeSMv01_13g1333	67.1933	14.4567	At5g07050
	GrapeSMv01_17g0135	4.96333	0.746667	UAM1
	GrapeSMv01_01g0273	35.1567	16.3567	CML14
	GrapeSMv01_05g0007	10.4533	2.63667	--
	GrapeSMv01_05g0855	23.4067	6.11333	--
	GrapeSMv01_14g1656	4.59	1.12	EMB3004
	GrapeSMv01_14g1904	42.6833	21.2233	PPCK1
	GrapeSMv01_09g0530	211.94	80.8	AATP1
	GrapeSMv01_18g0906	6.26333	1.04333	BHLH19
	GrapeSMv01_15g0731	5.37333	12.8133	ATL59
	GrapeSMv01_04g0446	21.3133	10.47	CCR4-6
	GrapeSMv01_15g0897	25.61	52.2767	ARF11
	GrapeSMv01_03g0670	14.84	5.27667	GAT1
	GrapeSMv01_03g0800	23.5067	7.12	--
	GrapeSMv01_03g0833	23.5067	7.12	--
	GrapeSMv01_17g0569	0.953333	5.1	CYP78A5
	GrapeSMv01_19g0768	11.4133	3.71	--
	GrapeSMv01_07g1306	8.68333	18.8167	LPA1
	GrapeSMv01_18g1884	4	0.0366667	LAC9
	GrapeSMv01_13g1745	8.54667	2.87333	cysG
	GrapeSMv01_05g0772	10.1233	0.69	TIMPA
	GrapeSMv01_14g1688	257.803	58.64	--
	GrapeSMv01_01g0500	2.63667	0.483333	PUB10
	GrapeSMv01_16g0884	11.19	35.04	--
	GrapeSMv01_16g1113	15.26	4.47	At5g24080
	GrapeSMv01_18g0930	2.00333	6.94	CYP707A1
	GrapeSMv01_11g0644	5.6	15.7667	CRR6
	GrapeSMv01_18g1617	4.06667	0.0533333	TT10
	GrapeSMv01_19g1152	7.50667	15.8767	--
	GrapeSMv01_13g0811	8.05667	0.3	--
	GrapeSMv01_01g0259	6.78333	2.30667	--
	GrapeSMv01_05g0578	2.46333	9.33	--
	MSTRG.13786	1.45667	11.6533	--
	GrapeSMv01_08g0476	4.63	1.36333	PUB16
	GrapeSMv01_05g1493	8.84333	2.94	CML3
	GrapeSMv01_15g0246	4.15667	1.23667	NPC3
	GrapeSMv01_17g0198	3.31	1.12333	HAK7
	GrapeSMv01_02g1356	223.537	62.33	CCD4
	GrapeSMv01_10g1083	3.9	0.653333	At1g06800
	GrapeSMv01_08g0699	4.00333	9.64	FKBP70
	GrapeSMv01_18g1596	3.42667	0.0766667	LAC14
	GrapeSMv01_13g0734	6.45667	0.696667	ZAT5
	GrapeSMv01_14g1713	13.6567	6.22	--
	GrapeSMv01_01g1010	1.83	5.88667	NPF2.13
	GrapeSMv01_10g0749	6.1	14.53	At1g28580
	GrapeSMv01_03g0963	12.8133	5.97	--
	GrapeSMv01_03g0253	1.30333	4.79667	MSL6
	GrapeSMv01_14g1243	5.51	2.63	SPT16
	GrapeSMv01_06g0373	9.25333	3.1	DOF5.3
	GrapeSMv01_06g0978	7.55667	18.4767	PTI6
	GrapeSMv01_08g1101	23.8633	7.68	OFUT19
	GrapeSMv01_18g1347	4.2	0.29	At1g20180
	GrapeSMv01_19g0482	7.45333	3.32333	SWEET2
	GrapeSMv01_11g0616	38.97	12.2767	AVP1
	GrapeSMv01_18g1137	4.03333	0.001	--
	GrapeSMv01_14g1700	6.2	12.63	KIN14U
	GrapeSMv01_02g0327	1.98667	5.09	ABCC10
	GrapeSMv01_13g1154	43.07	20.5533	--
	GrapeSMv01_05g0060	14.0533	2.69667	Fra
	GrapeSMv01_14g1965	6.68	2.63667	At4g27190
	GrapeSMv01_18g0160	9.64	21.86	PARB
	GrapeSMv01_11g0196	2.76333	0.443333	IQM4
	GrapeSMv01_19g0196	8.78	3.44333	ERF053
	GrapeSMv01_10g0436	9.47667	21.1233	ANR
	GrapeSMv01_12g1208	4.78	1.80667	RUN1
	GrapeSMv01_08g0130	8.9	2.58667	--
	GrapeSMv01_14g0517	1.93333	0.3	FER
	GrapeSMv01_10g0953	3.55333	0.673333	AGL62
	GrapeSMv01_05g0004	21.6967	10.1067	--
	GrapeSMv01_18g1867	2.37	0.0733333	LAC9
	GrapeSMv01_06g0471	16.7933	7.43	--
	GrapeSMv01_07g0179	6.96333	1.21667	HHO5
	GrapeSMv01_06g1575	19.9733	8.87667	DIVARICATA
	GrapeSMv01_16g0163	20.8767	4.74	VAMP721
	GrapeSMv01_18g1320	7.58	20.9767	--
	GrapeSMv01_09g0603	7.90333	0.06	--
	GrapeSMv01_12g0499	3.06333	0.41	--
	GrapeSMv01_13g1709	15.22	3.25333	--
	MSTRG.21035	0.623333	2.2	GIP
	GrapeSMv01_10g0558	7.19333	1.89333	NDA1
	GrapeSMv01_11g0311	75.4433	36.8267	--
	GrapeSMv01_18g1475	17.9833	8.96	SUC2
	GrapeSMv01_13g1568	6.60667	2.81667	Os01g0939600
	GrapeSMv01_19g0712	3.48667	11.7067	--
	GrapeSMv01_06g1346	15.4067	7.26667	VIT_06s0061g00120
	GrapeSMv01_06g0889	2.83	0.273333	UGT87A2
	GrapeSMv01_18g0296	19.9467	8.86	At3g26430
	GrapeSMv01_06g1433	2.73	6.56667	PRCP
	GrapeSMv01_17g0534	5.56	11.15	BIM1
	GrapeSMv01_10g0054	12.64	28.8233	RBCX1
	GrapeSMv01_14g1784	13.5867	28.83	IAA16
	GrapeSMv01_07g0096	9.22333	4.34667	HEXO3
	GrapeSMv01_18g0090	14.0967	4.80667	PIX13
	GrapeSMv01_10g1319	4.89667	0.33	--
	GrapeSMv01_10g0503	1.7	5.25	ENT3
	GrapeSMv01_13g0072	12.9633	6.29333	FAD7A-1
	GrapeSMv01_08g0534	5.78667	12.12	DTX44
	GrapeSMv01_10g0502	7.93333	16.91	--
	GrapeSMv01_18g0507	4.19333	0.57	PHI-1
	MSTRG.4980	27.78	57.34	SOD1
	GrapeSMv01_18g2073	2.52	6.42667	HSP70
	GrapeSMv01_16g1105	10.6	22.1	MAKR5
	GrapeSMv01_13g1776	7.22	3.04333	LECRK3
	GrapeSMv01_04g0881	2.12	6.89	AMT1-2
	GrapeSMv01_08g1556	25.38	9.73333	--
	GrapeSMv01_13g1631	0.95	3.59333	STL1
	GrapeSMv01_07g1381	14.0967	5.02333	EXL2
	GrapeSMv01_09g0504	2.25333	0.606667	PDR1
	GrapeSMv01_13g0663	10.26	3.12667	SYT3
	GrapeSMv01_02g0715	41.3267	19.26	PGSIP8
	GrapeSMv01_05g1175	0.123333	2.68333	CER26
	GrapeSMv01_11g1250	5.55333	0.76	XTH23
	GrapeSMv01_12g0212	15.1633	0.226667	At1g30760
	GrapeSMv01_14g1291	129.583	49.4833	BHLH148
	GrapeSMv01_10g0826	3.02	0.7	--
	GrapeSMv01_06g0799	8.13667	2.10667	CYP71E7
	GrapeSMv01_17g0256	5.28333	11.1633	--
	GrapeSMv01_04g0204	8.26	2.09667	ERF017
	GrapeSMv01_02g0488	10.3333	0.001	PMEI7
	GrapeSMv01_13g0112	15.6	7.76	At5g39865
	GrapeSMv01_12g0688	28.6633	13.1167	KRP1
	GrapeSMv01_11g0897	0.893333	0.123333	--
	GrapeSMv01_11g0784	2.50333	0.413333	ChiC
	GrapeSMv01_02g1301	0.663333	3.91333	TAT
	GrapeSMv01_05g0620	38.5667	8.24667	At1g31672
	GrapeSMv01_10g1079	3.15	0.47	At1g06800
	GrapeSMv01_01g0634	6.11667	15.09	ZFP4
	GrapeSMv01_05g1178	25.4667	52.38	ATJ20
	GrapeSMv01_14g0898	6.09667	12.6833	RUS4
	GrapeSMv01_08g1063	6.46667	13.6767	BLH9
	GrapeSMv01_02g0617	115.81	21.5667	TLP1
	GrapeSMv01_06g0606	4.08333	1.26	epsF
	GrapeSMv01_08g0240	0.496667	3.00333	CXE15
	GrapeSMv01_03g0727	2.54	0.0633333	UGT84A13
	GrapeSMv01_19g0653	9.48667	4.14667	--
	GrapeSMv01_Sca0124	13.7033	38.6033	FBA2
	GrapeSMv01_09g1264	7.64	3.25333	At3g50940
	GrapeSMv01_04g0191	9.49333	4.15667	RIPK
	GrapeSMv01_05g0601	14.14	5.43	MAKR1
	GrapeSMv01_03g0020	0.906667	5.87333	BBX21
	GrapeSMv01_14g1029	7.36	2.63667	--
	GrapeSMv01_11g0545	3.78	10.9567	ETN8
	GrapeSMv01_11g0065	6.34333	1.48333	SSL5
	GrapeSMv01_10g1064	5.66	0.983333	--
	GrapeSMv01_05g0857	32.5967	11.58	--
	GrapeSMv01_18g1066	4.31333	0.376667	At1g75040
	GrapeSMv01_14g1786	136.98	9.37	HEL
	GrapeSMv01_18g1271	0.693333	3.91667	--
	GrapeSMv01_16g1221	2.20667	7.26333	-
	GrapeSMv01_11g0636	1.50333	5.67	--
	GrapeSMv01_02g0429	4.27	0.503333	PME68
	GrapeSMv01_04g1126	2.92	8.21	GT5
	GrapeSMv01_07g0894	6.66667	14.5733	AMT3-1
	GrapeSMv01_04g0711	0.796667	3.15	GLR2.8
	GrapeSMv01_05g0521	13.9433	0.343333	DMP2
	GrapeSMv01_08g1437	32.5967	8.24333	--
	GrapeSMv01_17g0563	1.36333	0.2	COBL4
	GrapeSMv01_11g0293	5.02333	12.7833	--
	GrapeSMv01_01g0806	5.76	11.6833	NIK3
	GrapeSMv01_07g0414	3.72667	7.76667	WAV3
	GrapeSMv01_11g0122	5.23333	11.7767	NFYA3
	GrapeSMv01_14g0012	12.33	5.09667	fabG
	GrapeSMv01_11g1256	5.56333	0.743333	XTH23
	GrapeSMv01_10g0837	12.2367	6.02333	RKF1
	GrapeSMv01_14g0298	6.59	13.6333	--
	GrapeSMv01_07g1852	8.76667	3.06	PANC
	GrapeSMv01_18g0125	12.57	5.03	LOG5
	GrapeSMv01_15g0303	8.43	2.12	ATL17
	GrapeSMv01_04g1178	7.58667	1.51333	CTA_0378
	GrapeSMv01_06g0158	3.39667	0.436667	UGT92A1
	GrapeSMv01_08g0985	5.91333	2.07333	RBL1
	GrapeSMv01_16g1035	3.90667	0.876667	GSVIVT00026920001
	GrapeSMv01_11g0032	5.80333	1.23	ARG7
	GrapeSMv01_18g2280	4.82667	1.05333	ValCS
	GrapeSMv01_17g1227	4.56667	0.333333	KTI5
	GrapeSMv01_01g0537	3.81	16.9167	MLP34
	GrapeSMv01_13g0386	4.02667	0.44	SCL14
	GrapeSMv01_01g1462	13.1767	3.94333	--
	GrapeSMv01_12g0137	13.3033	6.12667	At5g35370
	GrapeSMv01_19g0144	16.1133	6.61333	MYB102
	GrapeSMv01_19g0146	5.29	2.00667	DGK5
	GrapeSMv01_09g0081	23.1233	10.46	--
	GrapeSMv01_01g1051	3.4	1.60333	--
	GrapeSMv01_03g0586	23.6367	0.876667	-
	GrapeSMv01_16g0032	1.65333	6.66667	--
	GrapeSMv01_14g1187	2.87	0.213333	--
	GrapeSMv01_15g0882	7.01667	0.543333	MYB3
	GrapeSMv01_18g2046	8.52667	17.8667	UGT88F3
	GrapeSMv01_05g0770	12.6233	1.59667	--
	GrapeSMv01_15g0034	10.7933	21.86	--
	GrapeSMv01_14g0657	6.71667	2.97	FAM214B
	GrapeSMv01_02g1297	2.34333	0.26	--
	GrapeSMv01_08g0920	1.22333	5.70333	LRK10
	GrapeSMv01_11g0052	6.16	16.63	LHCA6
	GrapeSMv01_12g1425	6.45333	14.29	retsat
	GrapeSMv01_06g0268	10.13	3.77	EDR2L
	GrapeSMv01_01g1268	1.85667	7.31667	At3g19800
	GrapeSMv01_02g1045	4.98667	2.39667	JMJ706
	GrapeSMv01_05g1327	5.9	14.33	UGT74E2
	GrapeSMv01_15g0457	2.86	11.7133	BIC1
	GrapeSMv01_02g1053	15.3133	7.45	--
	GrapeSMv01_13g1065	4.36	0.93	IP5P10
	GrapeSMv01_12g0114	2.62667	0.183333	TBL43
	GrapeSMv01_08g1108	19.45	9.67333	PUMP1
	GrapeSMv01_15g1117	2.11667	5.89	BAM2
	GrapeSMv01_16g1409	4.77333	11.0533	CBL7
	GrapeSMv01_08g0960	14.8367	4.23333	ATL52
	GrapeSMv01_10g0466	3.34	9.17	--
	GrapeSMv01_11g0321	4.67667	13.2733	--
	MSTRG.19279	6.52333	13.5	--
	GrapeSMv01_08g0381	6.15333	14.5733	AMT3-1
	GrapeSMv01_07g0509	2.92333	0.533333	BT4
	GrapeSMv01_11g1191	3.67333	7.48	At2g18940
	GrapeSMv01_05g0660	15.34	4.88667	yoaA
	GrapeSMv01_10g0285	4.40667	9.85667	COL10
	GrapeSMv01_14g0249	5.65333	1.01	--
	GrapeSMv01_05g0126	4.19333	11.6133	--
	GrapeSMv01_15g0683	3.93667	8.52333	--
	GrapeSMv01_14g1044	6.38	13.9167	SCPL45
	MSTRG.4305	4.81667	12.3433	ADH1
	GrapeSMv01_02g1062	17.7333	8.65	--
	GrapeSMv01_06g0267	10.02	2.86667	EDR2L
	GrapeSMv01_05g1385	29.84	12.6733	EP3
	GrapeSMv01_17g0022	7.25333	17.6967	--
	GrapeSMv01_04g0882	4.32667	10.5767	--
	GrapeSMv01_02g0352	1.95	7.98333	ALMT9
	GrapeSMv01_10g0294	3.74333	11.46	--
	GrapeSMv01_12g0538	223.89	96.6933	ACO3
	GrapeSMv01_09g0305	4.27333	8.95333	RPS5
	GrapeSMv01_16g1397	2.08333	5.18	--
	GrapeSMv01_16g1227	5.19333	11.26	LRK10
	GrapeSMv01_10g0887	4.42667	0.58	SRG1
	GrapeSMv01_07g1211	57.5267	28.5767	HIS2A
	GrapeSMv01_15g0614	10.9967	1.44667	--
	GrapeSMv01_12g0527	8.53333	3.92667	At1g05030
	GrapeSMv01_02g0707	3.72667	9.61	At4g16563
	GrapeSMv01_02g0653	5.86333	2.01333	TET10
	GrapeSMv01_14g1281	4.09667	14.5033	--
	GrapeSMv01_06g0215	244.24	110.473	RBCX2
	GrapeSMv01_18g1376	11.5533	4.38667	--
	GrapeSMv01_14g0850	2.8	5.93	PNP2
	GrapeSMv01_02g0165	7.34	2.84	--
	GrapeSMv01_08g1013	1.05667	4.22333	SRG1
	GrapeSMv01_07g0618	3.65333	10.3533	ERF008
	GrapeSMv01_13g1372	15.1333	36.9267	MIK2
	GrapeSMv01_01g0510	2.63667	5.84333	WDL7
	GrapeSMv01_16g0832	42.9067	5.44	VIT_16s0100g00290
	GrapeSMv01_02g1330	0.133333	1.42333	FAO4A
	GrapeSMv01_Sca0269	0.736667	3.67	CYP72A225
	GrapeSMv01_08g1407	1.01333	3.91667	UGT73C3
	GrapeSMv01_17g0212	17.0933	7.05	--
	MSTRG.10317	0.376667	2.54	At3g21340
	GrapeSMv01_03g0678	4.40667	10.22	PUB26
	GrapeSMv01_13g1054	1.06333	0.09	BSL2
	GrapeSMv01_16g0712	2.12667	7.01	LRK10
	GrapeSMv01_14g0431	3.82667	8.04333	TBL19
	GrapeSMv01_11g0531	5.38	1.56333	PER25
	GrapeSMv01_07g0227	1.43667	5.64667	--
	GrapeSMv01_12g0210	125.267	54.8867	CAJ1
	GrapeSMv01_10g0904	5.83	1.74667	SRG1
	GrapeSMv01_07g1133	5.53667	1.4	GIP2
	GrapeSMv01_01g0385	4.48667	0.633333	VQ8
	GrapeSMv01_05g0783	2.48333	0.8	ETR2
	GrapeSMv01_11g0559	2.87667	8.18667	YAB5
	GrapeSMv01_02g0716	3.42667	0.346667	PME68
	GrapeSMv01_01g0556	8.33667	19.81	ndhL
	GrapeSMv01_08g0702	1.23667	4.49	CYP94A1
	GrapeSMv01_08g1237	4.20333	10.48	LWD1
	GrapeSMv01_07g0306	11.5467	4.72	OVCA2
	GrapeSMv01_05g1714	6.57333	13.6067	UGT75C1
	GrapeSMv01_Sca0249	5.42	1.76667	STP-1
	GrapeSMv01_07g0353	6.17	2.46667	RBK1
	GrapeSMv01_11g0237	12.3967	5.54333	CDA1
	GrapeSMv01_16g1337	3.49	0.65	ARP1
	GrapeSMv01_14g1763	2.49333	0.766667	ACA13
	GrapeSMv01_18g2367	9.27333	4.34667	At1g07160
	GrapeSMv01_18g1369	11.6067	5.01333	--
	GrapeSMv01_12g0027	8.99667	18.23	RSL1D1
	GrapeSMv01_06g1256	2.34667	0.28	CYP75A1
	MSTRG.21484	5.43	0.173333	LAC14
	GrapeSMv01_10g0654	4.41333	11.95	BHLH162
	GrapeSMv01_01g0167	3.40667	1.33	ACD6
	GrapeSMv01_13g0213	6.64667	2.34667	WRKY70
	GrapeSMv01_15g0393	6.83333	1.58	--
	GrapeSMv01_08g0425	4.87333	1.74	PATL6
	GrapeSMv01_06g1611	6.06667	0.996667	NHL1
	GrapeSMv01_04g0039	13.6033	3.89	At4g25140
	GrapeSMv01_08g0891	1.86	4.69667	PP2C38
	GrapeSMv01_04g0773	1.84	0.306667	SUS6
	GrapeSMv01_09g0515	0.953333	0.113333	-
	GrapeSMv01_05g0642	11.8433	26.2133	FDC1
	GrapeSMv01_19g0466	0.72	3.87667	TBL38
	GrapeSMv01_08g1799	3.39333	9.73333	STR9
	GrapeSMv01_17g0333	7.07333	2.61	--
	GrapeSMv01_Sca0153	3.77333	0.733333	DREB1D
	GrapeSMv01_06g1223	2.13	0.001	PECS-2.1
	GrapeSMv01_04g1106	2.15333	0.313333	NFP
	GrapeSMv01_14g0307	0.12	7.56333	--
	GrapeSMv01_12g1317	2.82667	1.02	MIK2
	GrapeSMv01_18g1079	13.91	6.87	PEX11A
	GrapeSMv01_10g0579	0.38	2.12667	GES
	GrapeSMv01_09g0367	5.94	13.7433	IAA27
	GrapeSMv01_08g0665	4.90667	1.91	dfr1
	GrapeSMv01_17g0607	8.51333	4.01	MCH1
	GrapeSMv01_17g0653	3.99667	1.41	PCMP-E45
	GrapeSMv01_18g2225	3.35	1.31333	RUN1
	GrapeSMv01_18g0568	6.69333	3.24333	At1g28390
	GrapeSMv01_03g0729	4.41	1.48333	UGT84A13
	GrapeSMv01_12g0213	2.00667	0.186667	At1g30760
	GrapeSMv01_18g0480	6.73667	2.89667	ANN1
	GrapeSMv01_11g1243	1.97333	0.246667	4CL2
	GrapeSMv01_07g1456	7.01667	15.5067	D27
	GrapeSMv01_07g0897	5.25333	2.22333	ORP1A
	GrapeSMv01_13g0742	7.14667	3.31	NAC050
	GrapeSMv01_14g0821	4.15	1.30333	--
	GrapeSMv01_17g0254	5.33333	10.7833	PIN1A
	GrapeSMv01_18g1870	1.43	0.001	LAC9
	GrapeSMv01_12g0575	3.45333	0.716667	OMT2
	GrapeSMv01_10g0468	29.1767	4.62667	At4g27270
	GrapeSMv01_11g0855	1.07333	4.39667	SHT
	GrapeSMv01_16g1262	16.2067	6.6	GLT1
	GrapeSMv01_10g1536	5.92667	1.75667	GSVIVT00004047001
	GrapeSMv01_02g1049	0.06	0.863333	ROC3
	GrapeSMv01_15g0207	0.503333	2.25	MSL10
	GrapeSMv01_10g0132	15.0767	6.91667	DTX40
	GrapeSMv01_04g1137	1.55333	0.17	At2g18540
	GrapeSMv01_06g1574	8.44333	3.30333	NAC090
	GrapeSMv01_07g0560	2.11667	0.136667	CYP81Q32
	GrapeSMv01_18g1009	3.31	7.49	KO
	GrapeSMv01_01g1487	4.37333	0.133333	At5g14285
	GrapeSMv01_19g0064	6.61667	3.12	BHLH123
	GrapeSMv01_14g1416	28.1067	12.0733	--
	GrapeSMv01_12g1076	22.9367	49.07	EARLI1
	GrapeSMv01_10g0286	5.07333	10.3933	At5g47800
	GrapeSMv01_09g1254	3.27667	7.96333	At3g20240
	GrapeSMv01_04g0666	6.70667	2.99	At5g10770
	GrapeSMv01_16g0304	15.65	6.81333	--
	GrapeSMv01_01g0854	2.08333	0.27	MPAO1
	GrapeSMv01_07g1809	2.45333	5.65667	PIF1
	GrapeSMv01_10g0554	2.52	0.0133333	--
	GrapeSMv01_01g0322	1.30333	0.0833333	POT5
	GrapeSMv01_05g0784	2.70667	8.43667	AHL20
	GrapeSMv01_13g1582	3.58333	0.706667	--
	GrapeSMv01_01g1674	11.17	22.88	ACL1
	GrapeSMv01_08g1054	1.17	3.74667	PK1
	GrapeSMv01_14g0515	3.49	12.1067	--
	GrapeSMv01_11g1043	1.77	0.213333	CYP73A14
	GrapeSMv01_13g0247	5.18667	12.9267	--
	GrapeSMv01_06g0840	8.49333	3.77667	MAPKKK17
	GrapeSMv01_17g1298	2.93	0.86	SUS6
	GrapeSMv01_15g0045	2.53667	0.733333	--
	GrapeSMv01_13g0686	2.28	0.203333	AVT1C
	GrapeSMv01_03g1124	6.99667	2.75	-
	GrapeSMv01_02g1012	8.94	3.81333	--
	GrapeSMv01_08g0390	2.77	6.39333	LECRKS4
	GrapeSMv01_08g1056	2.55667	6.01333	PK1
	GrapeSMv01_08g0789	9.17	2.76333	LOG3
	GrapeSMv01_02g1018	0.11	0.953333	ABCB2
	GrapeSMv01_01g0714	6.92667	2.97	--
	GrapeSMv01_15g0323	1.49667	0.143333	NPF7.3
	GrapeSMv01_08g1679	1.47	5.07333	PNSB2
	GrapeSMv01_01g0291	6.00333	0.953333	--
	GrapeSMv01_03g0739	5.68667	0.0366667	--
	GrapeSMv01_15g0605	3.38333	0.0733333	BEN1
	GrapeSMv01_01g1723	9.16333	21.1333	NUDT13
	GrapeSMv01_14g1390	1.66333	6.31333	--
	GrapeSMv01_01g1690	11.1167	22.82	--
	GrapeSMv01_04g0504	3.74	11.36	BSD2
	GrapeSMv01_06g0578	3.17	0.001	At2g29260
	GrapeSMv01_15g0611	0.876667	3.09667	--
	GrapeSMv01_09g0016	4.06667	1.49667	At3g18020
	GrapeSMv01_03g0585	3.87667	0.05	At5g05600
	GrapeSMv01_10g0086	2.87667	0.506667	At4g22030
	GrapeSMv01_07g0041	1.51333	4.47333	--
	GrapeSMv01_01g0934	9.34333	19.6067	Os09g0383400
	GrapeSMv01_16g0864	2.23333	0.19	At4g00750
	GrapeSMv01_19g0224	10.6233	5.05667	RMA1H1
	GrapeSMv01_06g0263	0.976667	4.2	LOG1
	GrapeSMv01_18g0211	0.373333	2.89333	20ox2
	GrapeSMv01_03g0562	12.6667	26.8667	petM
	GrapeSMv01_18g0786	7.67	2.92	--
	GrapeSMv01_10g0465	2.36333	7.91667	--
	GrapeSMv01_18g0666	1.86	7.45333	--
	GrapeSMv01_06g0318	2.33667	5.04333	ARF4
	GrapeSMv01_04g0590	0.74	3.37	RLP21
	GrapeSMv01_02g0061	4.1	8.52333	mcfF
	GrapeSMv01_07g0542	1.88333	0.53	--
	GrapeSMv01_02g0227	3.49333	1.15	CSLG3
	GrapeSMv01_02g0942	3.14	0.593333	AHL23
	GrapeSMv01_01g0038	3.47667	8.62333	--
	GrapeSMv01_08g1009	4.22667	9.35667	--
	GrapeSMv01_07g0716	7.58333	3.03667	HIPP23
	GrapeSMv01_19g0675	359.853	161.297	--
	GrapeSMv01_17g0532	5.79667	2.74333	Phrf1
	GrapeSMv01_13g0015	5.8	2.44	--
	GrapeSMv01_08g0796	2.31333	0.28	--
	GrapeSMv01_04g1306	4.10333	1.95333	At1g19860
	GrapeSMv01_01g1027	2.38	0.38	-
	GrapeSMv01_14g1130	0.42	2.18	MYB16
	GrapeSMv01_10g0358	10.09	4.58667	ACA8
	GrapeSMv01_14g0979	0.41	1.47	ABCB15
	GrapeSMv01_19g0545	4.85	1.22	ENODL1
	GrapeSMv01_07g0813	1.27	0.27	CESA2
	MSTRG.4365	1.31	4.59	ADH1
	GrapeSMv01_18g0935	2.27333	7.31333	LHCA5
	GrapeSMv01_19g0498	2.1	5.49667	PNSL3
	GrapeSMv01_15g0866	4.39333	2.13	WNK4
	GrapeSMv01_14g0897	2.41333	0.14	SWEET6B
	GrapeSMv01_01g1428	5.02	2.43	AIRP2
	GrapeSMv01_13g0571	4.74	9.64333	YKR070W
	GrapeSMv01_02g0115	6.33667	2.75667	PPA1
	GrapeSMv01_12g1297	0.34	1.49333	MIK2
	GrapeSMv01_13g0279	6.24	1.43	--
	MSTRG.7478	1.29	0.001	CYP81E8
	GrapeSMv01_18g1887	0.983333	0.001	LAC9
	GrapeSMv01_11g0515	0.306667	1.87	NPF6.2
	GrapeSMv01_07g1176	0.316667	1.74667	GS2
	GrapeSMv01_08g1061	1.14333	4.96	DLC
	GrapeSMv01_07g1041	80.5967	31.84	HSFA2D
	GrapeSMv01_06g0522	2.06667	0.746667	IDN2
	GrapeSMv01_03g1243	0.566667	2.40667	ABCG11
	GrapeSMv01_06g0160	4.24333	9.60667	UGT92A1
	GrapeSMv01_01g0090	2.38333	0.756667	RPM1
	GrapeSMv01_06g0898	12.0233	5.93333	At2g30170
	GrapeSMv01_06g0091	3.41	1.03333	--
	GrapeSMv01_08g1007	8.9	17.9967	--
	MSTRG.4549	0.47	4.98	--
	GrapeSMv01_11g0253	3.97333	7.99	--
	GrapeSMv01_05g0248	1.40333	0.11	RAP
	GrapeSMv01_07g0758	9.50667	19.0733	--
	GrapeSMv01_03g0445	1.71667	0.001	--
	GrapeSMv01_07g0962	2.24333	5.57667	CXE18
	GrapeSMv01_05g0100	25.81	10.5433	BXL1
	GrapeSMv01_19g0725	0.866667	0.173333	ABCC3
	GrapeSMv01_10g0037	3.08	6.73333	PDF2
	GrapeSMv01_12g0042	1.4	4.48667	TPK3
	MSTRG.10316	0.63	2.73333	At2g19230
	GrapeSMv01_19g0112	1.72667	4.31333	-
	GrapeSMv01_10g1535	3.23333	0.653333	VIT_16s0100g01030
	GrapeSMv01_06g0682	22.0633	10.97	At2g29260
	GrapeSMv01_02g1258	1.89667	5.43333	At1g31830
	GrapeSMv01_01g1660	7.21	3.01	At5g13200
	GrapeSMv01_08g0762	6.22	2.53333	TOGT1
	GrapeSMv01_13g1196	0.44	2.05	CCR1
	GrapeSMv01_18g0784	2.76667	8.35333	WLIM1
	GrapeSMv01_06g0254	2.97	0.0533333	ACA7
	GrapeSMv01_02g0895	1.01333	2.33	--
	GrapeSMv01_16g0886	2.29667	0.25	-
	GrapeSMv01_11g0731	1.24333	3	At2g24230
	GrapeSMv01_18g0616	3.34667	11.0533	CER2
	GrapeSMv01_09g1120	2.70333	0.92	fray2
	GrapeSMv01_19g0359	1.45667	4.42667	--
	GrapeSMv01_02g0292	10.6067	2.03333	WRKY53
	GrapeSMv01_05g0853	20.52	10.0433	--
	GrapeSMv01_02g0315	0.993333	11.06	--
	GrapeSMv01_17g0581	1.77333	3.55333	LNG2
	GrapeSMv01_08g1368	1.7	0.216667	ATHB-51
	GrapeSMv01_04g1220	6.61333	0.273333	SAMT
	GrapeSMv01_01g0026	0.206667	1.83667	CYP78A5
	GrapeSMv01_11g1287	0.306667	3.58333	PR-1
	GrapeSMv01_01g0309	3.08667	1.24333	rngB
	GrapeSMv01_04g0164	4.97667	11.7267	ndhU
	GrapeSMv01_03g1112	1.31333	0.223333	LECRK91
	GrapeSMv01_13g0653	5.96333	12.1967	--
	GrapeSMv01_07g1377	1.01667	0.0833333	SBT1.5
	GrapeSMv01_05g0746	5.47	2.08333	BHLH92
	GrapeSMv01_13g0501	23.91	48.12	HSP18.2
	GrapeSMv01_18g1013	1.47333	3.21	FLACCA
	GrapeSMv01_10g1452	1.71	0.516667	EIX1
	GrapeSMv01_09g0932	4.20333	2.06333	At5g63020
	GrapeSMv01_02g0614	24.0767	10.8267	ERG3
	GrapeSMv01_18g2033	4.21	9.14333	Cmbl
	GrapeSMv01_02g0257	4.95333	10.13	At4g10955
	GrapeSMv01_02g0581	4.53333	2.12333	PLDBETA1
	GrapeSMv01_04g0992	4.74333	10.1233	--
	GrapeSMv01_14g0775	4.75333	10.91	--
	GrapeSMv01_13g0879	1.18333	0.153333	--
	GrapeSMv01_14g1565	2.65667	6.46667	--
	GrapeSMv01_18g1567	1.32	0.07	TT10
	GrapeSMv01_12g1104	4.24667	9.43667	--
	GrapeSMv01_08g0474	1.33333	0.216667	AZG1
	GrapeSMv01_01g0935	8.09667	17.1167	RH22
	GrapeSMv01_10g0736	1.30667	0.126667	NCL1
	GrapeSMv01_07g0541	5.81667	2.42667	--
	GrapeSMv01_17g0957	6.48333	2.45	--
	GrapeSMv01_13g1370	2.34333	8.53333	MIK2
	GrapeSMv01_06g0885	1.65333	7.49	CIA2
	GrapeSMv01_16g1178	0.5	2.43	SWEET3B
	GrapeSMv01_15g0185	0.926667	4.44667	J
	GrapeSMv01_16g0663	0.296667	2.96	PMEI7
	GrapeSMv01_04g1217	1.56	5.87333	SAMT
	GrapeSMv01_Sca0272	0.853333	2.58667	--
	GrapeSMv01_13g1457	3.90333	1.64667	At3g14460
	GrapeSMv01_06g1082	0.586667	2.41333	CCX1
	GrapeSMv01_06g1160	2.02	5.16	TUBB4
	GrapeSMv01_07g1832	3.94667	0.0933333	At3g07010
	GrapeSMv01_06g0938	7.6	15.71	GSVIVT00023967001
	GrapeSMv01_16g0108	2.20667	5.37667	HSR201
	GrapeSMv01_16g0292	3.41	7.83667	FSD2
	GrapeSMv01_13g0524	2.65667	6.56333	UGT709C2
	GrapeSMv01_01g0720	5.57333	11.9233	CYP71B35
	GrapeSMv01_18g0546	14.86	6.61333	At4g40080
	GrapeSMv01_14g0546	3.97667	11.0933	CRR7
	GrapeSMv01_11g1193	3.55333	1.50667	PMA4
	GrapeSMv01_04g0514	0.993333	0.163333	PLD1
	GrapeSMv01_11g1252	3.04667	0.463333	XTH23
	GrapeSMv01_09g0642	2.46667	0.68	ETN8
	GrapeSMv01_03g0357	3.01667	6.75	MPT1
	GrapeSMv01_06g0558	2.48333	0.81	SIT2
	GrapeSMv01_10g0039	2.28	0.346667	TSB
	GrapeSMv01_03g0691	1.87333	0.273333	TOGT1
	GrapeSMv01_03g1082	7.66333	3.54333	HVA22A
	GrapeSMv01_10g1020	12.3867	4.32667	--
	GrapeSMv01_19g0625	5.07667	1.89667	MAPKKK18
	GrapeSMv01_08g1044	6.03333	2.68333	--
	GrapeSMv01_14g1383	3.43333	1.29	PME22
	GrapeSMv01_07g2135	4.1	13.07	--
	GrapeSMv01_13g0817	3.49333	0.11	--
	GrapeSMv01_13g1385	3.73333	0.29	--
	GrapeSMv01_01g1083	5.38333	2.25	HVA22A
	MSTRG.3569	9.29	4.40667	ASI1
	GrapeSMv01_08g0765	2.27333	1.04	EMS1
	GrapeSMv01_05g1128	48.6067	21.7867	CHS2
	GrapeSMv01_05g0743	6.35	13.9	NRPE7
	GrapeSMv01_19g0998	5.51	11.2433	CYP72A225
	GrapeSMv01_04g1013	2.77333	7.76667	PIN5
	GrapeSMv01_02g0520	5.61	2.28	At4g22758
	GrapeSMv01_02g1076	3.86	0.486667	CYP76B10
	GrapeSMv01_03g1248	3.80333	8.15	ABC4
	GrapeSMv01_09g1065	4.93	0.0866667	LAC9
	GrapeSMv01_07g1130	3.86	8.09	At2g27310
	GrapeSMv01_01g0807	2.50667	0.49	At1g23390
	GrapeSMv01_06g0283	10	4.75333	PIP2-7
	GrapeSMv01_11g0520	0.21	1.88333	DBR
	GrapeSMv01_11g0382	1.96333	0.273333	PLT5
	GrapeSMv01_01g0350	4.54	9.65333	--
	GrapeSMv01_10g0781	2.37667	6.55333	--
	GrapeSMv01_09g1350	1.15	2.83	--
	GrapeSMv01_18g0046	4.46667	10.5067	PPD3
	GrapeSMv01_04g1708	1.88667	0.0366667	PILS1
	GrapeSMv01_08g0238	6.86667	2.67	RF178
	GrapeSMv01_18g1737	2.21333	0.196667	--
	GrapeSMv01_07g0944	5.83333	1.85333	LIGB
	GrapeSMv01_18g1132	2.49667	0.316667	PRXIIE-1
	GrapeSMv01_06g0403	7.1	2.26333	ATS3
	GrapeSMv01_04g1339	3.34	6.86667	TL1
	GrapeSMv01_11g0874	1.00667	3.14333	SCPL29
	GrapeSMv01_13g0208	8.37667	3.76	GLY1
	GrapeSMv01_16g0579	2.78333	6.88667	RLP54
	GrapeSMv01_08g1760	3.00333	1.04333	LECRKS5
	GrapeSMv01_06g0480	17.5333	8.23333	At1g18250
	GrapeSMv01_01g0994	3.17	6.36333	GLCAT14A
	MSTRG.22314	0.913333	4.61667	--
	GrapeSMv01_06g0288	2.19333	0.183333	--
	GrapeSMv01_05g0721	2.12	5.46	KCS11
	GrapeSMv01_12g0327	3.02	0.91	MLO2
	GrapeSMv01_02g0438	3.45667	7.63667	At4g16563
	GrapeSMv01_19g1092	9.74667	20.5233	PARC
	GrapeSMv01_13g1737	1.28333	0.376667	FTIP1
	GrapeSMv01_13g0297	3.03	8.16667	PNSL1
	GrapeSMv01_06g0152	5.48667	1.88333	LOX1.5
	GrapeSMv01_02g0104	0.04	0.913333	ATL79
	GrapeSMv01_14g1593	2.55667	7.19667	--
	GrapeSMv01_18g1386	56.4267	23.0433	SWEET1
	GrapeSMv01_10g0270	21.4167	69.2967	--
	GrapeSMv01_08g1090	1.43333	0.123333	LAC7
	GrapeSMv01_14g0616	2.36	0.543333	ERF114
	MSTRG.10255	14.81	5.39667	--
	GrapeSMv01_11g0036	4.70333	10.0867	PRXQ
	GrapeSMv01_02g0192	2.6	5.81	cox1101
	GrapeSMv01_03g0977	33.3167	0.496667	PR1B1
	GrapeSMv01_04g0372	1.01667	6.52667	RD22
	GrapeSMv01_09g0478	0.66	3.43	AUX22
	GrapeSMv01_07g0134	15.5	31.56	--
	GrapeSMv01_01g0779	3.84333	1.61333	SMR15
	GrapeSMv01_13g1834	1.77333	0.806667	XI-F
	GrapeSMv01_12g0771	0.966667	0.05	At5g48130
	GrapeSMv01_13g0980	3.19667	1.58667	RPV1
	GrapeSMv01_01g0569	1.73667	7.03	PCR2
	GrapeSMv01_11g1258	2.22333	0.11	XTH23
	GrapeSMv01_07g0474	6.6	3.11	ACR1
	GrapeSMv01_11g1246	0.376667	2.94667	VIT_11s0052g01140
	GrapeSMv01_14g1614	1.02667	2.69	--
	GrapeSMv01_04g0458	4.32667	12.1833	--
	GrapeSMv01_06g0886	2.44667	0.896667	UGT87A2
	GrapeSMv01_09g1082	0.326667	1.53333	-
	GrapeSMv01_01g0267	24.8667	11.1333	RHA2A
	GrapeSMv01_11g0093	1.46333	4.31	--
	GrapeSMv01_12g1123	0.483333	1.79	GT6
	GrapeSMv01_14g0607	49.4667	18.3467	CHS
	GrapeSMv01_18g0864	0.67	2.19	-
	GrapeSMv01_08g0465	3.52333	7.30333	PNC1
	GrapeSMv01_18g0483	0.001	1.07667	--
	GrapeSMv01_11g0365	1.24333	3.31333	ROPGEF8
	GrapeSMv01_14g1084	3.72333	10.3067	FTSH6
	GrapeSMv01_05g1294	7.06	14.8067	MRL7L
	GrapeSMv01_01g1001	1.08	0.21	LRK10L-1.5
	GrapeSMv01_11g0472	26.99	13.4467	KCS11
	GrapeSMv01_02g1209	22.7467	0.83	NIT4B
	GrapeSMv01_16g1226	2.22333	5.11667	LRK10
	GrapeSMv01_14g1993	1.16	2.93	SKOR
	GrapeSMv01_17g0766	3.24667	1.49	ZAT5
	GrapeSMv01_14g0500	0.626667	2.72	BA13
	GrapeSMv01_15g0971	1.29667	0.001	ANR
	GrapeSMv01_10g0580	0.253333	0.996667	GES
	GrapeSMv01_11g0277	3.29667	0.993333	Os06g0561000
	GrapeSMv01_03g0248	2.27333	0.863333	MSL6
	GrapeSMv01_01g0058	0.713333	2.19667	PCMP-H12
	GrapeSMv01_08g1480	4.09667	8.79333	KIN7O
	GrapeSMv01_04g0930	4.84667	1.83667	--
	GrapeSMv01_01g1710	4.65667	13.8133	NPF6.1
	GrapeSMv01_11g1160	0.81	3.52333	DBR
	GrapeSMv01_05g0560	2.28333	0.83	--
	GrapeSMv01_07g0692	0.95	0.001	PLP1
	GrapeSMv01_14g0789	0.19	3.35333	--
	GrapeSMv01_12g0712	1.61333	0.153333	MYB102
	GrapeSMv01_05g0098	5.22333	10.4467	VEP1
	GrapeSMv01_04g0230	0.33	1.86667	LRK10
	GrapeSMv01_18g0102	4.60333	2.3	GT17
	GrapeSMv01_17g1155	3.52667	1.38667	--
	GrapeSMv01_12g1326	213.19	443.143	SEND33
	GrapeSMv01_14g1687	2.49333	1.16	At4g27190
	GrapeSMv01_09g0333	0.51	2.54667	--
	GrapeSMv01_06g0926	2.25	5.88333	SCT
	GrapeSMv01_17g0280	1.24667	3.35667	BGLU44
	GrapeSMv01_07g1179	2.75667	0.703333	--
	GrapeSMv01_16g0111	1.89667	5.43333	--
	GrapeSMv01_08g0014	4.28333	14.0133	--
	GrapeSMv01_08g0055	5.18333	2.57667	--
	GrapeSMv01_06g0200	80.7233	14.69	--
	GrapeSMv01_10g1549	5.14333	2.03667	GSVIVT00004047001
	GrapeSMv01_16g0968	7.04667	1.95	--
	GrapeSMv01_02g0629	6.44667	1.48	--
	GrapeSMv01_17g0387	1.84667	4.43	COL16
	GrapeSMv01_12g0449	4.52	1.04333	--
	GrapeSMv01_05g1726	1.39333	0.116667	XTH16
	GrapeSMv01_14g1755	0.333333	1.85	THT2
	GrapeSMv01_08g1804	1.75333	0.46	TGA10
	GrapeSMv01_03g0503	4.37667	1.73333	At4g34320
	GrapeSMv01_14g0525	2.41667	5.08	FER
	GrapeSMv01_02g0456	2.24	8.93	EARLI1
	GrapeSMv01_07g1141	1.25333	4.22	IPT3
	MSTRG.16119	4.72	2.08	--
	GrapeSMv01_01g0719	0.516667	2.11667	-
	GrapeSMv01_03g1324	4.94	1.77333	At3g13560
	GrapeSMv01_17g0713	2.59667	5.85	At1g08570
	GrapeSMv01_08g1308	1.62333	4.19667	IQM3
	GrapeSMv01_04g1022	0.943333	2.38667	RIC4
	GrapeSMv01_06g0504	5.65333	0.536667	--
	GrapeSMv01_14g1188	2.74	6.37	--
	GrapeSMv01_11g0842	3.69333	0.993333	--
	GrapeSMv01_06g1079	3.14667	0.936667	--
	GrapeSMv01_15g1011	2.38667	0.583333	CHIT3
	GrapeSMv01_13g0280	5.39667	1.73	--
	GrapeSMv01_05g0201	1.85667	3.88667	GALT3
	GrapeSMv01_13g0876	0.26	1.16	--
	GrapeSMv01_09g0195	2.25	0.623333	At3g44060
	GrapeSMv01_14g0265	4.79667	1.66333	--
	GrapeSMv01_07g0385	3.77667	10.9	CAD
	GrapeSMv01_18g2360	11.07	4.06	RPV1
	GrapeSMv01_15g0736	2.89333	6.18333	--
	GrapeSMv01_09g0080	13.1733	6.25	--
	GrapeSMv01_17g0194	0.713333	2.54667	IDD14
	GrapeSMv01_09g0300	1.41333	3.18667	RPS5
	GrapeSMv01_06g0347	5.55333	2.59	DOF5.3
	GrapeSMv01_01g1586	0.576667	3.18	LTPG1
	GrapeSMv01_13g1373	0.91	6.66	MIK2
	GrapeSMv01_06g1369	1.40333	3.61333	UGT86A1
	MSTRG.586	1.68667	0.001	--
	GrapeSMv01_07g0578	4.10667	0.666667	--
	GrapeSMv01_07g0591	4.10667	0.666667	--
	GrapeSMv01_05g1658	2.68333	11.19	AVT1H
	GrapeSMv01_12g0645	2.20333	6.20333	CYCU1-1
	GrapeSMv01_03g0442	1.98667	6.72667	RL3
	GrapeSMv01_13g0702	4.20667	8.88	--
	GrapeSMv01_13g0812	2.72667	0.163333	--
	GrapeSMv01_16g0842	3.65	1.26333	DREB1D
	GrapeSMv01_13g1589	3.53667	1.69667	AGL15
	GrapeSMv01_18g0576	5.5	2.18667	CYCD4-2
	GrapeSMv01_06g0617	3.90667	1.21667	COPT1
	GrapeSMv01_07g1057	4.12667	1.36333	--
	GrapeSMv01_13g0600	7.01333	2.00333	DREB1F
	GrapeSMv01_04g1696	0.0666667	1.1	HMGR2
	GrapeSMv01_07g1293	1.72333	0.283333	GSTF13
	GrapeSMv01_09g1266	2.85333	1.11333	At3g50940
	GrapeSMv01_02g0601	4.49667	2.07667	DTX49
	GrapeSMv01_13g0212	3.07	0.986667	WRKY55
	GrapeSMv01_05g0069	16.7667	6.87	Fra
	GrapeSMv01_09g0491	0.193333	1.60667	LE
	GrapeSMv01_10g0585	0.64	0.0366667	At4g04980
	GrapeSMv01_09g0846	1.76	0.66	--
	GrapeSMv01_07g0473	1.33	0.146667	PP2A10
	GrapeSMv01_07g0110	5.64	2.09667	--
	GrapeSMv01_16g0944	5.13333	2.15333	LTI65
	GrapeSMv01_11g0219	0.676667	2.35	PAO5
	GrapeSMv01_06g1200	2.15	4.36	SCL3
	GrapeSMv01_07g1506	1.90333	0.333333	--
	GrapeSMv01_Sca0055	1.66667	3.37	TPS1
	GrapeSMv01_15g0744	2.23667	5.61333	CYP87A3
	GrapeSMv01_09g0566	2.01	5.51667	AFUA_6G02780
	GrapeSMv01_06g0100	5.36	1.26333	DIR7
	GrapeSMv01_11g0482	15.02	7.35	--
	GrapeSMv01_12g1125	0.21	1.47333	GT6
	GrapeSMv01_02g0216	0.07	0.823333	CSLG3
	GrapeSMv01_18g0401	7.85	3.34667	--
	GrapeSMv01_19g1283	0.516667	1.72667	AVT1I
	GrapeSMv01_14g1235	2.14333	4.31333	At2g42960
	GrapeSMv01_12g1173	5.85333	13.9067	ARPN
	GrapeSMv01_05g1656	1.21333	3.05667	PME35
	GrapeSMv01_19g0733	2.51667	8.24667	CYP71D10
	GrapeSMv01_17g0915	2.48	6.25333	UGT90A1
	GrapeSMv01_18g2177	2.69667	0.3	N
	GrapeSMv01_08g0459	0.903333	2.40667	--
	GrapeSMv01_02g0575	2.05667	0.0933333	SGR
	GrapeSMv01_01g0637	3.67333	1.16	CYB561C
	GrapeSMv01_07g1888	2.53	5.14667	--
	GrapeSMv01_01g0754	2.61667	0.43	--
	GrapeSMv01_01g1120	6.28333	2.55	CML45
	GrapeSMv01_Sca0182	0.456667	1.88667	At1g06620
	MSTRG.22079	1.26667	0.143333	--
	GrapeSMv01_08g0391	0.163333	1.05	LECRKS4
	GrapeSMv01_09g0649	2.49667	0.82	At1g32860
	GrapeSMv01_18g1866	0.743333	0.0433333	-
	GrapeSMv01_18g0750	2.77	6.42	WLIM1
	GrapeSMv01_03g0266	7.17333	3.32333	LYM2
	GrapeSMv01_05g1554	0.706667	4.79	--
	GrapeSMv01_07g0812	1.98333	0.513333	--
	GrapeSMv01_10g0445	1.31333	3.26333	TPS13
	GrapeSMv01_01g0545	0.653333	4.61333	MLP28
	GrapeSMv01_17g0075	1.03	0.39	NOV
	GrapeSMv01_01g0137	0.853333	2.57333	ZIP5
	GrapeSMv01_04g1433	7.01	3.09333	CHIT1B
	GrapeSMv01_08g1372	2.88667	0.993333	At3g53040
	GrapeSMv01_07g0123	0.163333	1.80667	STS14
	GrapeSMv01_14g0334	0.743333	2.23333	LRK10L-2.4
	GrapeSMv01_11g0007	2.42	0.77	At4g31140
	GrapeSMv01_13g1077	1.67667	0.356667	--
	GrapeSMv01_18g2469	2.80333	0.893333	At4g10260
	GrapeSMv01_09g0604	2.77	0.08	--
	GrapeSMv01_01g0680	2.44333	0.666667	At1g14600
	GrapeSMv01_16g0852	2.10333	5.08333	DAPB3
	GrapeSMv01_08g0776	1.98333	0.566667	LYK3
	GrapeSMv01_07g0662	0.636667	0.001	--
	GrapeSMv01_13g0476	3.16667	1.31	SBT4.3
	GrapeSMv01_15g0688	2.33333	1.02667	At4g00750
	MSTRG.8794	2.28	0.416667	--
	GrapeSMv01_05g0172	6.14	2.92667	--
	GrapeSMv01_10g0023	1.75	4.56	CPC
	GrapeSMv01_18g1214	0.923333	2.50667	BBX21
	GrapeSMv01_18g0657	1.84333	4.36333	BHLH93
	GrapeSMv01_10g0894	0.973333	0.001	SRG1
	GrapeSMv01_04g1110	2.86333	1.13	CML41
	GrapeSMv01_08g1410	0.52	2.16333	UGT73C3
	GrapeSMv01_10g0648	5.46667	2.11	LECRK71
	GrapeSMv01_18g1076	4.55333	2.05	guaA
	GrapeSMv01_09g0235	0.103333	1.57	At1g17710
	GrapeSMv01_11g0073	1.98	0.17	--
	GrapeSMv01_11g1261	1.22333	0.0233333	XTH22
	GrapeSMv01_05g0663	13.7633	6.79333	yoaA
	GrapeSMv01_17g0263	5.63333	2.49667	RABA6B
	GrapeSMv01_07g2116	3.04333	6.51667	UGT74E2
	GrapeSMv01_02g1285	3.95667	8.19	SH3P1
	GrapeSMv01_10g0254	0.993333	2.87667	ASAT1
	GrapeSMv01_04g0471	0.0733333	0.956667	--
	MSTRG.1765	1.20667	0.06	RPS13A
	GrapeSMv01_10g0772	4.82667	1.35	HIPP28
	GrapeSMv01_03g0382	1.25333	0.303333	LECRKS5
	MSTRG.4325	4.43667	9.76	--
	GrapeSMv01_03g0700	3.41333	1.26667	CYCD3-3
	GrapeSMv01_14g1501	5.43	2.7	At3g26430
	GrapeSMv01_19g0701	1.75	0.546667	TRN1
	GrapeSMv01_02g1141	1.51667	0.203333	NIT4B
	GrapeSMv01_04g0188	0.593333	0.001	At3g43860
	GrapeSMv01_15g0607	0.84	0.001	--
	GrapeSMv01_06g1420	5.51333	2.19333	NHL3
	GrapeSMv01_18g2482	1.59	4.34333	PUP4
	GrapeSMv01_08g1543	0.696667	2.22333	--
	GrapeSMv01_08g1052	1.89	0.723333	PK1
	GrapeSMv01_15g0502	2.61	0.38	EXPB2
	GrapeSMv01_14g1270	6.72333	14.6733	GOLS2
	GrapeSMv01_13g0503	7.29	16.46	HSP18.2
	GrapeSMv01_12g1201	3.12333	1.15667	RPV1
	GrapeSMv01_05g0735	9.01	24.5433	IAA14
	GrapeSMv01_12g1190	5.6	12.98	ARPN
	GrapeSMv01_04g0560	0.96	2.94	ZFP3
	GrapeSMv01_04g0113	2.65	5.86	GATA22
	GrapeSMv01_11g1237	1.58333	0.0533333	GALT3
	MSTRG.4359	0.52	2.46667	--
	GrapeSMv01_04g1177	2.12333	0.68	PYROXD2
	GrapeSMv01_12g0868	14.37	6.08667	HIPP16
	GrapeSMv01_19g0700	2.85333	1.31667	TRN1
	GrapeSMv01_14g0646	3.49	0.92	POB1
	GrapeSMv01_06g0356	1.06333	2.78667	NPF2.7
	GrapeSMv01_06g1267	1.08	0.14	CYP75A1
	GrapeSMv01_07g0653	0.823333	0.15	sbt3
	GrapeSMv01_12g1402	0.001	0.903333	TIFY3B
	GrapeSMv01_10g0791	1.98333	0.893333	MDIS2
	GrapeSMv01_19g0763	2.94	6.21667	NFYB8
	GrapeSMv01_18g1169	0.596667	1.76667	BHLH110
	GrapeSMv01_14g0013	1.78333	0.276667	WRKY75
	GrapeSMv01_10g0096	1.07333	0.1	At4g22030
	GrapeSMv01_04g1111	1.72	0.62	RTC2
	GrapeSMv01_14g0085	3.44333	1.29667	fabG
	GrapeSMv01_09g0273	5.95333	0.61	MIOX1
	GrapeSMv01_17g0404	0.413333	1.61	CYP71AU50
	GrapeSMv01_19g0019	2.26	4.6	PNSL3
	GrapeSMv01_08g1738	1.27	0.44	MET2A
	GrapeSMv01_15g0890	5.39	1.53333	LBD12
	GrapeSMv01_11g0006	1.56667	3.24333	--
	GrapeSMv01_09g0427	1.2	2.62667	At3g16010
	GrapeSMv01_14g0681	0.91	0.24	EIX2
	GrapeSMv01_17g1128	0.613333	1.79	hemW
	GrapeSMv01_03g1071	1.46333	0.213333	GGP5
	GrapeSMv01_18g1419	0.883333	1.89667	RCH1
	GrapeSMv01_07g1419	0.146667	1.42	MYB12
	GrapeSMv01_12g0380	2.85	0.833333	BHLH162
	GrapeSMv01_19g0501	3.15	6.53	--
	GrapeSMv01_17g0203	0.333333	1.22667	SKOR
	GrapeSMv01_02g0304	4.15333	11.1333	--
	GrapeSMv01_05g1788	1.09	2.75667	ACD6
	GrapeSMv01_10g0993	6.00667	2.59	--
	GrapeSMv01_Sca0318	0.57	1.76333	NPF5.10
	GrapeSMv01_05g1319	1.2	2.82667	PCMP-H12
	GrapeSMv01_18g2032	1.38667	0.283333	RLP32
	GrapeSMv01_08g0605	77.5567	237.517	LSAT_1X82001
	GrapeSMv01_01g0490	4.51333	1.35333	--
	GrapeSMv01_15g0578	1.37	3.13333	PERK9
	GrapeSMv01_07g1547	3.90333	8.82667	CESA8
	GrapeSMv01_19g0037	0.11	0.786667	VIT_19s0014g04930
	GrapeSMv01_10g1189	3.04667	6.45	WAK1
	GrapeSMv01_18g0451	0.001	0.68	--
	GrapeSMv01_10g0085	0.923333	0.02	At4g22030
	GrapeSMv01_15g0019	0.79	0.283333	RPPL1
	GrapeSMv01_06g0550	3.40667	7.74667	--
	GrapeSMv01_18g1590	0.456667	0.001	TT10
	GrapeSMv01_05g0626	0.0833333	1.67	AO1
	GrapeSMv01_06g1114	1.19333	2.66	matK
	GrapeSMv01_12g0474	3.19667	1.58333	Bp10
	GrapeSMv01_10g1242	1.46333	0.416667	WRKY14
	GrapeSMv01_18g0335	0.26	1.45333	FLS
	GrapeSMv01_16g0863	1.34333	0.001	At4g00750
	GrapeSMv01_01g0098	3.07667	6.19	CLPF
	GrapeSMv01_Sca0059	1.68	4.47333	gpsn2
	GrapeSMv01_02g0890	2.65	0.776667	NCS1
	GrapeSMv01_01g0709	1.96	0.543333	SEOB
	GrapeSMv01_08g0193	5.20333	2.57	CYP71D55
	GrapeSMv01_06g1307	3.38333	1	--
	GrapeSMv01_16g0135	3.67333	1.44333	LRK10
	GrapeSMv01_16g1255	3.11667	0.98	--
	GrapeSMv01_04g1543	0.27	1.78667	--
	GrapeSMv01_14g0369	1.34333	0.19	LBD41
	GrapeSMv01_13g0528	4.45333	2.21333	UGT709C2
	GrapeSMv01_14g1126	2.96333	0.833333	PCMP-E40
	GrapeSMv01_13g0258	0.36	1.57667	KCS19
	GrapeSMv01_05g0950	1.3	0.133333	SOP1
	GrapeSMv01_08g0587	1.11667	0.256667	AZG1
	GrapeSMv01_10g0366	1.61333	0.373333	--
	MSTRG.392	1.83667	0.553333	--
	GrapeSMv01_14g0823	14.14	6.22	--
	GrapeSMv01_02g0094	6.38667	2.88333	--
	GrapeSMv01_07g1058	3.05333	1.03	ACD6
	GrapeSMv01_08g1534	0.146667	1.78667	MIZ1
	GrapeSMv01_03g0551	1.14333	0.226667	CYP82C2
	GrapeSMv01_19g0355	0.836667	0.173333	TBL31
	GrapeSMv01_15g0851	0.223333	1.09333	-
	GrapeSMv01_Sca0230	1.32	0.126667	--
	GrapeSMv01_10g1417	1.83333	0.653333	ZFWD1
	GrapeSMv01_05g1717	2.82667	0.87	UGT75L6
	GrapeSMv01_10g0360	3.50667	0.8	ACA13
	GrapeSMv01_16g0973	0.71	0.0166667	CYP735A2
	GrapeSMv01_14g0321	1.39	3.14333	UGT89A2
	GrapeSMv01_06g1538	2.3	4.72333	At1g67190
	GrapeSMv01_11g0491	0.57	1.98667	PID2
	GrapeSMv01_14g0606	87.4933	30.6833	CHS
	GrapeSMv01_06g0568	1.23333	0.363333	ETR2
	GrapeSMv01_16g1212	16.8533	42.37	LRK10
	GrapeSMv01_12g0787	0.473333	1.24667	PCMP-H38
	GrapeSMv01_11g0115	3.14667	10.2267	--
	GrapeSMv01_17g0469	0.166667	1.43333	--
	GrapeSMv01_18g0943	0.543333	4.92	--
	GrapeSMv01_12g0987	2.53667	1.26333	DGK5
	GrapeSMv01_01g0416	0.29	1.25333	LRK10L-1.1
	GrapeSMv01_11g0535	1.05667	0.343333	PLD1
	GrapeSMv01_14g0959	4.32	0.84	At3g28540
	GrapeSMv01_10g0954	0.726667	0.16	CHX15
	GrapeSMv01_13g0292	5.87	12.8733	PPL1
	GrapeSMv01_09g1277	1.25	0.32	QRT3
	GrapeSMv01_05g0146	0.826667	2.03667	STS1
	GrapeSMv01_18g1287	1.19667	3.16333	--
	GrapeSMv01_08g0091	3.68333	7.77	DTX21
	GrapeSMv01_13g0346	0.333333	1.19	--
	GrapeSMv01_18g0792	2.54667	1.01333	At5g43190
	GrapeSMv01_01g1412	0.486667	1.91333	BHLH111
	GrapeSMv01_13g0470	0.463333	1.59333	BLH9
	GrapeSMv01_09g0163	0.523333	1.45	PUB34
	GrapeSMv01_12g0450	0.893333	0.0733333	--
	GrapeSMv01_04g0011	0.186667	2.17	PHP5
	GrapeSMv01_10g0356	6.57	3.09667	ACA13
[truncated: 683 more rows]

## Sheet: Table S9
	Table S9. The details of all negative metabolites detected
	Name	control_mean	Dro_mean	Dro_ALA_mean	MS2_name	MS1_name	formula	Class
	NEG_M91T31	1.37997e+06	825967	6.16504e+06	--	--	--	--
	NEG_M91T93	1.86275e+07	1.72761e+07	1.31268e+07	--	--	--	--
	NEG_M93T380	2.03372e+07	1.45745e+08	3.43675e+07	--	--	--	--
	NEG_M93T289	1.16213e+07	3.30964e+07	1.87873e+07	--	--	--	--
	NEG_M93T473	1.5501e+06	1.48247e+06	1.24516e+06	--	Cyclohexane-1,3-dione	C6H8O2	--
	NEG_M93T215	5.41928e+06	2.88769e+07	4.02963e+06	--	--	--	--
	NEG_M95T93	211221491	2.1585e+08	2.27802e+08	--	--	--	--
	NEG_M95T32	551570	6.69073e+06	1.14036e+06	--	--	--	--
	NEG_M95T42	1.27839e+06	1.72013e+07	1.60172e+07	--	--	--	--
	NEG_M95T68	1.89334e+06	5.07832e+06	2.99904e+06	--	--	--	--
	NEG_M95T61	2.56787e+06	3.11973e+06	1.85106e+06	--	L-3-Cyanoalanine	C4H6N2O2	Carboxylic acids and derivatives
	NEG_M96T32	2.10563e+06	1.8929e+06	2.21479e+06	--	--	--	--
	NEG_M96T53	191445	575737	3.43581e+06	--	--	--	--
	NEG_M96T65	438128	1.5225e+06	3.17023e+06	--	--	--	--
	NEG_M97T83_1	1.06719e+07	3.31773e+07	1.66999e+08	--	--	--	--
	NEG_M97T460	4.63461e+07	5.27136e+07	9.38199e+07	--	--	--	--
	NEG_M97T539	1.14362e+08	8.76114e+07	7.51485e+07	--	--	--	--
	NEG_M97T496	1.61986e+07	8.46449e+07	5.00137e+07	--	--	--	--
	NEG_M97T476	8.7102e+07	8.68149e+07	3.08551e+07	--	--	--	--
	NEG_M97T734	3.33524e+07	2.00274e+07	1.00822e+07	--	--	--	--
	NEG_M97T773	13334692967	4.23754e+07	5.72843e+06	--	Caproic acid	C6H12O2	Fatty Acyls
	NEG_M97T310	2.71533e+08	6.12977e+07	3.7884e+07	--	--	--	--
	NEG_M97T704	2.53386e+07	4.80282e+07	6.17606e+07	--	--	--	--
	NEG_M97T218	2.5868e+07	3.9175e+07	4.75659e+07	--	--	--	--
	NEG_M97T83_2	2851047082	2637466130	6.53537e+09	--	--	--	--
	NEG_M97T163	4.01685e+07	3.21305e+07	7.52696e+07	Hydrogen phosphate	--	H3PO4	Non-metal oxoanionic compounds
	NEG_M97T433	1.14035e+08	6.27462e+07	1.08566e+07	--	--	--	--
	NEG_M97T511	8.85984e+06	1.21821e+08	5.06807e+07	--	--	--	--
	NEG_M97T443	8.13367e+07	3.53452e+07	3.74278e+07	--	--	--	--
	NEG_M97T391	8.50096e+07	4.34787e+07	1.12804e+08	--	--	--	--
	NEG_M97T558	2.11534e+07	1.75876e+07	6.47153e+07	--	--	--	--
	NEG_M97T521	1.66082e+07	1.47364e+07	2.13952e+07	--	--	--	--
	NEG_M97T127	5.73588e+07	5.05555e+07	2.63949e+08	--	--	--	--
	NEG_M97T262	2.29359e+07	2.2325e+07	8.2077e+07	--	--	--	--
	NEG_M97T107	2.91935e+08	1.51531e+08	3.96059e+08	--	--	--	--
	NEG_M97T83_3	3.37819e+07	6.10064e+08	4.41164e+07	--	--	--	--
	NEG_M97T93	4.49734e+07	5.53918e+07	5.09542e+07	--	alpha-Ketoisovaleric acid	C5H8O3	Keto acids and derivatives
	NEG_M97T54	6.35644e+06	1.52299e+06	3.3589e+06	--	--	--	--
	NEG_M97T38	1.84547e+07	9.69461e+06	6.91314e+06	--	--	--	--
	NEG_M97T195	469633	3.64612e+06	718737	--	trans-1,2-Cyclohexanediol	C6H12O2	--
	NEG_M98T52	610551	1.35568e+07	7.35332e+06	--	--	--	--
	NEG_M98T42	134.271	3.17282e+06	9.43302e+06	--	Succinimide	C4H5NO2	--
	NEG_M99T102_1	2.00154e+08	420039527	2.98983e+08	--	--	--	--
	NEG_M99T79	2.5885e+07	7.05171e+06	1.53941e+07	--	--	--	--
	NEG_M99T35	1.99498e+06	1.26127e+06	1.63678e+06	--	--	--	--
	NEG_M99T56	134.271	1.65983e+06	1.01578e+06	--	--	--	--
	NEG_M99T84	1.91403e+07	1.21863e+07	4.49505e+07	--	--	--	--
	NEG_M99T102_2	3.00223e+08	1.84835e+08	2.81653e+08	--	--	--	--
	NEG_M99T464	2.5082e+07	6.84305e+06	4.57625e+06	--	--	--	--
	NEG_M99T130	1.03706e+08	8.55164e+07	1.06866e+08	--	--	--	--
	NEG_M99T540	134.271	1.02623e+07	9.80807e+06	--	--	--	--
	NEG_M99T509	2.42859e+07	1.17338e+07	1.29273e+07	--	--	--	--
	NEG_M99T263	1.10585e+07	6.35591e+06	7.48736e+06	--	--	--	--
	NEG_M99T704	5.63398e+06	1.47659e+07	2.71093e+07	--	--	--	--
	NEG_M99T636	3.3138e+07	1.24998e+07	2.38303e+07	--	--	--	--
	NEG_M99T602	2.58194e+07	1.27156e+07	1.03911e+07	--	--	--	--
	NEG_M99T682	3.69213e+07	1.2226e+07	1.12084e+07	Succinic anhydride	--	C4H4O3	Oxolanes
	NEG_M99T662	1.81793e+07	1.34001e+07	1.19257e+07	--	--	--	--
	NEG_M99T722	3.56493e+07	3.90289e+07	5.47427e+07	--	--	--	--
	NEG_M99T389	1.73499e+07	8.98549e+06	7.36729e+06	--	--	--	--
	NEG_M99T591	3.9416e+07	2.26298e+07	9.15142e+06	--	--	--	--
	NEG_M99T377	1.60643e+07	9.43449e+06	7.49695e+06	--	--	--	--
	NEG_M99T559	9.45881e+06	10941133	1.03456e+07	--	--	--	--
	NEG_M99T653	3.20056e+06	9.98005e+06	1.75795e+07	--	--	--	--
	NEG_M99T353	1.42605e+07	2.70844e+07	3.88803e+07	--	--	--	--
	NEG_M99T324	4.19124e+06	1.02057e+07	3.25508e+07	--	--	--	--
	NEG_M99T93	2.52139e+07	2.29304e+07	2.07443e+07	--	--	--	--
	NEG_M99T192	5.02991e+06	8.16415e+06	6.48933e+06	Tiglic acid	--	C5H8O2	Fatty Acyls
	NEG_M99T136	1.15184e+07	7.55693e+06	7.76982e+06	--	--	--	--
	NEG_M99T68	4.65001e+06	4.47461e+06	7.1023e+06	--	--	--	--
	NEG_M100T66	1.55088e+06	1.46809e+06	2.84344e+06	--	Bovinocidin	C3H5NO4	Allyl-type 1,3-dipolar organic compounds
	NEG_M100T103	1.06373e+07	3.63453e+06	4.80057e+06	--	--	--	--
	NEG_M100T130	3.37688e+06	3.0181e+06	3.8056e+06	--	--	--	--
	NEG_M100T37	4.09414e+06	5.13934e+06	4.14028e+06	--	--	--	--
	NEG_M101T102	4.23741e+07	124348801	8.92375e+07	--	--	--	--
	NEG_M101T92_1	165794500	8.96882e+06	9.04535e+06	--	--	--	--
	NEG_M101T39_1	8.16741e+06	8.37807e+06	6.35074e+06	--	--	--	--
	NEG_M101T92_2	2019737019	2040401518	1.93977e+09	--	2-Ketobutyric acid	C4H6O3	Keto acids and derivatives
	NEG_M101T59	1.00339e+08	474873384	1.59149e+08	--	--	--	--
	NEG_M101T37	3.99122e+08	6396919825	1.63259e+09	--	Succinate semialdehyde	C4H6O3	Fatty Acyls
	NEG_M101T636	3.40619e+08	4.82382e+08	6.14352e+08	--	--	--	--
	NEG_M101T71	2.69613e+08	6.11841e+08	7.96984e+08	--	--	--	--
	NEG_M101T308	2.37421e+08	1897748722	1.2258e+09	--	--	--	--
	NEG_M101T619	19394866689	541682268	3.50119e+08	--	--	--	--
	NEG_M101T431	1.44111e+08	3.33995e+08	4.00033e+08	--	--	--	--
	NEG_M101T414	5.73523e+08	3.16012e+08	3.10871e+08	--	--	--	--
	NEG_M101T498	872177829	2.0769e+08	1.76812e+08	--	--	--	--
	NEG_M101T270	1226939902	4.49971e+08	2.24637e+08	--	--	--	--
	NEG_M101T397	1.88489e+08	4.73388e+08	8.04064e+08	--	--	--	--
	NEG_M101T166	8.12103e+08	5.71679e+08	5.4818e+08	--	--	--	--
	NEG_M101T225	6.25101e+08	5495715878	3.0165e+09	L-Erythrulose	--	C4H8O4	Organooxygen compounds
	NEG_M101T540	5.58994e+08	2.5048e+08	1.04062e+08	--	--	--	--
	NEG_M101T779	9.18156e+07	4371418743	1.08228e+09	--	--	--	--
	NEG_M101T692	5.32925e+08	1.133e+08	4.01387e+08	--	--	--	--
	NEG_M101T519	4249051232	5.70868e+08	4.339e+08	--	--	--	--
	NEG_M101T282	7.31482e+08	2.78573e+08	2.19834e+08	--	--	--	--
	NEG_M101T384	7.61173e+08	2.98031e+08	1.16041e+08	--	--	--	--
	NEG_M101T771	687426166	5.20788e+08	1.37007e+08	--	--	--	--
	NEG_M101T183	8.86742e+07	1.00989e+08	3.70971e+08	--	--	--	--
	NEG_M101T510	8.59441e+07	1.78337e+08	1.85539e+08	--	--	--	--
	NEG_M101T486	5.98177e+08	3.02145e+08	2.76957e+08	--	--	--	--
	NEG_M101T444	260577758	4.28217e+08	5.31959e+08	--	--	--	--
	NEG_M101T471	2.74401e+08	2.99877e+08	5.70859e+08	--	Purine	C5H4N4	Imidazopyrimidines
	NEG_M101T93	3.15381e+07	1.14723e+07	4.72035e+06	--	--	--	--
	NEG_M101T39_2	8.36984e+06	6.52162e+06	6.44214e+06	--	--	--	--
	NEG_M101T62	5.14957e+06	2.76259e+07	1.51758e+07	--	--	--	--
	NEG_M102T92	6.34518e+07	7.04898e+07	7.04453e+07	--	--	--	--
	NEG_M102T37	1.64727e+07	5.56547e+07	1.36275e+08	--	--	--	--
	NEG_M102T32	1.25641e+06	1.44235e+06	1.60535e+06	--	--	--	--
	NEG_M102T84	9.91531e+06	2.05132e+07	1.33365e+07	--	3-Aminoisobutanoic acid	C4H9NO2	Carboxylic acids and derivatives
	NEG_M103T122	549018	1.56491e+06	5.27458e+06	--	--	--	--
	NEG_M103T86	5.13764e+07	9.64723e+06	7.9245e+06	--	--	--	--
	NEG_M103T39	3.09709e+06	2.87312e+06	960540	--	gamma-Aminobutyric acid	C4H9NO2	Carboxylic acids and derivatives
	NEG_M103T95	3.55816e+07	2.93208e+07	1.72384e+07	--	--	--	--
	NEG_M103T79	8.96005e+06	2.1147e+07	1.70954e+07	--	--	--	--
	NEG_M103T172	3.12381e+06	4.64654e+06	4.99065e+06	--	--	--	--
	NEG_M103T104	4.50361e+06	6.56706e+06	6.50857e+06	--	Hydroxypyruvic acid	C3H4O4	Hydroxy acids and derivatives
	NEG_M103T37	2.98925e+06	5.77472e+06	3.78143e+06	--	--	--	--
	NEG_M103T65	2.68686e+06	5.5052e+06	9.20131e+06	Malonate	--	C3H4O4	Carboxylic acids and derivatives
	NEG_M103T136	2.80946e+06	3.34016e+07	7.29553e+06	--	--	--	--
	NEG_M103T158	2.6685e+07	3.61844e+07	2.74401e+07	--	--	--	--
	NEG_M104T88	1.63997e+07	5.49464e+07	1.9188e+07	L-Serine	--	C3H7NO3	Carboxylic acids and derivatives
	NEG_M105T87	6.74312e+07	9.99923e+07	7.16813e+07	--	--	--	--
	NEG_M105T86_1	9.48936e+08	446225063	9.00197e+08	Glyceric acid	--	C3H6O4	Organooxygen compounds
	NEG_M105T636	9.89117e+07	7.26378e+07	6.77314e+07	--	--	--	--
	NEG_M105T541	5.76906e+07	4.16151e+07	4.72905e+07	--	--	--	--
	NEG_M105T497	5.47898e+07	2.87332e+07	3.91949e+07	--	--	--	--
	NEG_M105T349	3.2507e+07	2.82969e+07	5.69813e+07	--	--	--	--
	NEG_M105T382	1.11592e+08	6.05664e+07	6.33678e+07	--	--	--	--
	NEG_M105T254	2.63256e+07	5.89466e+07	8.56529e+07	--	--	--	--
	NEG_M105T763	5.78607e+07	101684149	7.42527e+07	--	--	--	--
	NEG_M105T395	7.58702e+07	4.188e+07	5.43693e+07	--	--	--	--
	NEG_M105T781	4.56314e+07	7.54539e+07	9.7022e+07	--	--	--	--
	NEG_M105T224	5.13908e+07	3.1838e+07	4.89124e+07	--	--	--	--
	NEG_M105T524	6.04761e+07	3.22734e+07	8.53233e+07	--	--	--	--
	NEG_M105T455	2.65034e+07	8.68906e+07	1.06102e+08	--	--	--	--
	NEG_M105T327	4.74495e+07	3.70362e+07	2.96898e+07	--	--	--	--
	NEG_M105T270	1.42332e+08	6.57543e+07	3.693e+07	--	--	--	--
	NEG_M105T568	6.36765e+07	4.89026e+07	8.58368e+07	--	--	--	--
	NEG_M105T599	1.02355e+08	5.38178e+07	4.60351e+07	--	--	--	--
	NEG_M105T430	1.25417e+07	3.12456e+07	3.817e+07	--	--	--	--
	NEG_M105T409	8.87738e+07	2.4399e+07	3.69209e+07	--	--	--	--
	NEG_M105T284	8.72715e+07	4.25508e+07	6.10269e+07	--	--	--	--
	NEG_M105T108	1.12674e+08	5.57395e+07	7.03516e+07	--	--	--	--
	NEG_M105T437	3.97742e+07	1.68176e+07	5.60968e+07	--	--	--	--
	NEG_M105T308	1.09907e+08	3.56518e+07	2.87302e+07	--	--	--	--
	NEG_M105T730	3.86351e+07	2.28365e+07	4.41914e+07	--	--	--	--
	NEG_M106T86	2.20502e+07	9.88463e+06	2.22602e+07	--	--	--	--
	NEG_M106T55	2.7371e+06	90966.5	579376	--	--	--	--
	NEG_M106T71	5.67232e+06	165273	624040	--	--	--	--
	NEG_M106T39	3.40123e+06	1.55107e+06	1.18314e+06	--	--	--	--
	NEG_M107T93	3.32383e+07	2.15223e+07	2.95794e+07	--	5-Aminoimidazole-4-carboxamide	C4H6N4O	Azoles
	NEG_M108T217	5.51904e+07	1.16529e+08	8.69712e+07	1,2-Benzoquinone	--	C6H4O2	Organooxygen compounds
	NEG_M108T246	5.75904e+06	6.9667e+07	1.1263e+07	--	Quinone	C6H4O2	Organooxygen compounds
	NEG_M108T51	1.37971e+06	1.59288e+06	885705	--	--	--	--
	NEG_M108T36	1.37192e+06	850826	1.27917e+06	--	4-Aminophenol	C6H7NO	Benzene and substituted derivatives
	NEG_M108T167	764480	692476	3.91639e+06	--	--	--	--
	NEG_M109T443	5.23168e+06	1.95249e+07	8.2375e+06	1,3-Benzenediol	--	C6H6O2	Benzene and substituted derivatives
	NEG_M109T553	1.00854e+07	1.51824e+07	1.40911e+07	--	--	--	--
	NEG_M109T246	6.34452e+06	5.68606e+07	1.71908e+07	--	--	--	--
	NEG_M109T192	7.0967e+06	1.05469e+07	1.11268e+07	--	--	--	--
	NEG_M109T229	2.07794e+07	9.85279e+07	3.25892e+07	--	--	--	--
	NEG_M109T53	2.35591e+06	664268	812889	--	--	--	--
	NEG_M111T95	1.11571e+07	2.33952e+07	4.23286e+07	--	--	--	--
	NEG_M111T102	2.16777e+08	1.61177e+08	1.63169e+08	--	--	--	--
	NEG_M111T84	2.74729e+08	3.25444e+08	2.58667e+08	--	--	--	--
	NEG_M111T73	1.25636e+08	1.97327e+08	8.94993e+07	--	--	--	--
	NEG_M111T308	1.31987e+07	1.18181e+07	1.44027e+07	--	--	--	--
	NEG_M111T541	1.27638e+07	7.36937e+06	7.71967e+06	--	--	--	--
	NEG_M111T502	8.86552e+06	9.1573e+06	8.35548e+06	--	--	--	--
	NEG_M111T463	1.41191e+07	1.34226e+07	1.15148e+07	--	--	--	--
	NEG_M111T233	1.51252e+07	9.90706e+06	1.15151e+07	--	--	--	--
	NEG_M111T762	4.80493e+06	7.16791e+06	3.20941e+07	--	--	--	--
	NEG_M111T418	1.16381e+07	1.29522e+07	1.78327e+07	--	--	--	--
	NEG_M111T690	2.30609e+07	1.97205e+07	1.67971e+07	--	--	--	--
	NEG_M111T118	1.5827e+08	1.92213e+08	2.39803e+08	--	--	--	--
	NEG_M111T219	1.26946e+08	9.30073e+07	8.6601e+07	--	--	--	--
	NEG_M111T269	2.11544e+07	2.39242e+07	1.17037e+07	--	--	--	--
	NEG_M111T298	3.01105e+07	1.66417e+07	1.09506e+07	--	--	--	--
	NEG_M111T660	3.15499e+07	1.32871e+07	6.47411e+06	--	--	--	--
	NEG_M111T408	3.09405e+07	3.91669e+07	7.30789e+06	--	--	--	--
	NEG_M111T651	2.84225e+07	2.72473e+07	5.2572e+07	--	--	--	--
	NEG_M111T435	2.01585e+07	3.14658e+07	1.03308e+07	--	--	--	--
	NEG_M111T365	2.98886e+07	3.57258e+07	2.2711e+07	--	--	--	--
	NEG_M111T611	2.98081e+07	3.29855e+07	1.25353e+07	--	--	--	--
	NEG_M111T196	5.97057e+07	7.88256e+07	3.50449e+07	--	--	--	--
	NEG_M111T92	6.40808e+07	125882409	1.43105e+08	--	--	--	--
	NEG_M111T600	3.96124e+07	1.59959e+07	9.52122e+06	--	--	--	--
	NEG_M111T156	2.12915e+07	5.9428e+07	7.03618e+07	2-Furoate	--	C5H4O3	Furans
	NEG_M111T165	4.59504e+07	1.57347e+07	1.62251e+07	--	--	--	--
	NEG_M111T756	4.87014e+07	9.29219e+07	1.84492e+08	--	--	--	--
	NEG_M111T779	1.06001e+07	8.86227e+07	1.63641e+08	--	--	--	--
	NEG_M112T41	8.02314e+06	3.49902e+06	5.90123e+06	--	--	--	--
	NEG_M112T93	3.56153e+07	3.96104e+07	3.53031e+07	--	--	--	--
	NEG_M112T68	134.271	4.66542e+06	2.70199e+06	--	--	--	--
	NEG_M112T40	4.51402e+06	4.13802e+06	4.72296e+06	--	--	--	--
	NEG_M112T98	7.28144e+06	4.27274e+06	4.26906e+06	--	--	--	--
	NEG_M112T39	6.65281e+06	4.02552e+06	2.78529e+06	--	--	--	--
	NEG_M112T32	5.94323e+06	6.34235e+06	6.87285e+06	--	--	--	--
	NEG_M112T837	4.73415e+06	7.56436e+06	6.7098e+06	--	--	--	--
	NEG_M112T791	1.00019e+07	1.96377e+07	2.84422e+07	--	--	--	--
	NEG_M112T780	134.271	3.43722e+06	1.94197e+06	--	--	--	--
	NEG_M112T727	7.16985e+07	3.34859e+06	3.65072e+06	--	--	--	--
	NEG_M112T767	7.68667e+06	1.19403e+07	5.51346e+06	--	--	--	--
	NEG_M112T737	4.45369e+06	134.271	3.71219e+07	--	--	--	--
	NEG_M112T716	5.42106e+06	2.06155e+06	1.3506e+06	--	--	--	--
	NEG_M112T680	4.19354e+06	1.39903e+06	7.84705e+06	--	--	--	--
	NEG_M113T411	2.38166e+07	3.73437e+07	3.8607e+07	--	--	--	--
	NEG_M113T498	2.8064e+07	2.56614e+07	2.70825e+07	--	2-Heptanone	C7H14O	Organooxygen compounds
	NEG_M113T453	5.60846e+07	4.35195e+07	4.10984e+07	--	--	--	--
	NEG_M113T88	2.21297e+08	1.92726e+08	1.02518e+08	--	--	--	--
	NEG_M113T396	7.79021e+07	3.32999e+07	3.49312e+07	--	--	--	--
	NEG_M113T260	15312853871	6.56129e+07	4.27713e+07	--	--	--	--
	NEG_M113T123	6.25129e+08	8.36177e+08	5.50608e+08	Creatinine	--	C4H7N3O	Carboxylic acids and derivatives
	NEG_M113T441	1.77223e+07	2.28063e+07	4.13751e+07	--	--	--	--
	NEG_M113T427	2.39893e+07	4.20722e+07	3.21859e+07	--	--	--	--
	NEG_M113T283	2.50171e+07	3.1019e+07	3.61319e+07	--	--	--	--
	NEG_M113T540	3.12433e+07	3.51435e+07	3.47364e+07	--	--	--	--
	NEG_M113T605	142034177	4.12631e+07	5.45735e+07	--	--	--	--
	NEG_M113T322	2.28417e+07	3.70872e+07	3.21066e+07	--	--	--	--
	NEG_M113T389	9.44585e+06	2.43938e+07	2.75609e+07	--	--	--	--
	NEG_M113T295	2.06976e+08	3.3088e+07	3.87147e+07	--	--	--	--
	NEG_M113T245	101270513	2.31995e+07	3.47963e+07	--	--	--	--
	NEG_M113T224	6.41035e+07	2.84051e+07	5.54033e+07	--	--	--	--
	NEG_M113T161	1.08592e+08	4.26939e+07	5.50302e+07	--	Oxalacetic acid	C4H4O5	Keto acids and derivatives
	NEG_M113T333	2.66456e+07	1.86594e+07	5.68624e+07	--	--	--	--
	NEG_M113T676	9.66742e+07	7.39279e+07	3.92613e+07	--	--	--	--
	NEG_M113T744	3.7064e+07	2.98288e+07	3.50525e+07	--	--	--	--
	NEG_M113T646_1	1.93296e+08	3.84761e+07	4.03625e+07	--	--	--	--
	NEG_M113T342	5.39284e+07	6.41393e+07	3.94491e+07	--	--	--	--
	NEG_M113T724	4.81015e+07	4.74416e+07	2.93477e+07	--	--	--	--
	NEG_M113T305	2.21114e+07	8.42985e+07	4.10608e+07	--	--	--	--
	NEG_M113T358	1.06043e+08	7.81137e+07	4.07444e+07	--	--	--	--
	NEG_M113T235	2.41217e+07	4.46627e+07	3.58837e+07	--	--	--	--
	NEG_M113T666	3.1706e+07	2.41057e+07	4.44174e+07	--	--	--	--
	NEG_M113T529	9.86463e+08	6.14837e+07	9.79641e+07	--	--	--	--
	NEG_M113T205	3.9019e+08	8.14139e+07	1.11316e+08	--	--	--	--
	NEG_M113T146	3.49084e+07	4.46754e+07	5.26021e+07	--	--	--	--
	NEG_M113T102	8.0139e+07	1.13874e+08	1.0329e+08	--	--	--	--
	NEG_M113T93_1	3314082325	3275307769	3.26102e+09	--	--	--	--
	NEG_M113T416	8.94484e+07	7.6953e+07	8.6653e+07	--	--	--	--
	NEG_M113T463	2.10796e+08	6.02154e+07	6.37008e+07	--	--	--	--
	NEG_M113T381	1098030921	1.00086e+08	7.29673e+07	--	--	--	--
	NEG_M113T559	3.30248e+07	6.91215e+07	4.14017e+07	--	--	--	--
	NEG_M113T269	1.0358e+08	3.76347e+07	1.01524e+08	--	--	--	--
	NEG_M113T259	1.27384e+07	4.87637e+07	8.83027e+07	--	--	--	--
	NEG_M113T126	6.81662e+07	1.11274e+08	1.5909e+08	--	--	--	--
	NEG_M113T315	5.14726e+07	3.81879e+07	7.90284e+07	--	--	--	--
	NEG_M113T595_2	3.36045e+07	7.97991e+07	3.04485e+07	--	--	--	--
	NEG_M113T822	1.2631e+08	4.14859e+07	5.12726e+07	--	--	--	--
	NEG_M113T341	3.62487e+07	6.34707e+07	5.98617e+07	--	--	--	--
	NEG_M113T153	3.76161e+08	6.63533e+07	1.25433e+08	Tulipalin B	--	C5H6O3	--
	NEG_M113T496	4.36962e+07	8.75524e+07	7.54071e+07	--	--	--	--
	NEG_M113T646_2	1.39602e+07	5.72108e+07	1.84279e+08	--	Methylsuccinic acid	C5H8O4	Fatty Acyls
	NEG_M113T583	1.85959e+08	6.00958e+07	1.39144e+08	--	--	--	--
	NEG_M113T93_2	2.11619e+07	1.79699e+07	1.82867e+07	--	--	--	--
	NEG_M113T286	4.16369e+06	8.74483e+06	4.40682e+06	--	--	--	--
	NEG_M114T102	4.70917e+06	2.78004e+06	3.93608e+06	--	--	--	--
	NEG_M114T123	7.32953e+06	1.39007e+07	8.416e+06	--	--	--	--
	NEG_M114T92	172908592	1.62805e+08	1.53974e+08	--	--	--	--
	NEG_M114T32	6.78145e+06	9.21032e+06	9.06413e+06	--	--	--	--
	NEG_M114T98	2.23571e+06	7.51324e+07	6.59172e+06	--	--	--	--
	NEG_M114T52	897009	931338	369932	--	--	--	--
	NEG_M114T833	3.11978e+07	2.99662e+07	2.64109e+07	--	--	--	--
	NEG_M114T691	134.271	2.22389e+07	1.97538e+07	--	--	--	--
	NEG_M114T717	8.76502e+06	2.70293e+07	6.97757e+06	--	--	--	--
	NEG_M114T773	3.42704e+06	1.68753e+07	6.15458e+06	--	--	--	--
	NEG_M114T806	2.53621e+06	3.10599e+07	2.24311e+07	--	--	--	--
	NEG_M114T795	1.99602e+07	7.06392e+07	2.1269e+07	--	--	--	--
	NEG_M115T507	1.61044e+07	29876060	5.34036e+07	--	--	--	--
	NEG_M115T134	2.1828e+07	3.57111e+07	9.56686e+07	--	--	--	--
	NEG_M115T121	1.33008e+07	7.72991e+06	2.73056e+07	--	--	--	--
	NEG_M115T541	5.66344e+06	7.97328e+06	5.42117e+06	--	--	--	--
	NEG_M115T612	5.02813e+06	1.60721e+07	1.22433e+07	--	--	--	--
	NEG_M115T455	6.30233e+06	5.76932e+06	1.02768e+07	--	--	--	--
	NEG_M115T182	8.60344e+06	9.33646e+06	8.42182e+06	--	--	--	--
	NEG_M115T391	1.04583e+07	6.41977e+06	6.82734e+06	--	--	--	--
	NEG_M115T766	1.387e+07	9.56153e+06	7.37524e+06	--	--	--	--
	NEG_M115T638	7.97286e+06	4.2189e+06	1.00623e+07	--	--	--	--
	NEG_M115T81	2164220961	2983176010	2.69689e+09	Fumaric acid	--	C4H4O4	Carboxylic acids and derivatives
	NEG_M115T157	5.50692e+07	1.04977e+08	1.24885e+08	Maleic acid	--	C4H4O4	Carboxylic acids and derivatives
	NEG_M115T364	4.91512e+06	7.49733e+06	9.53951e+06	--	--	--	--
	NEG_M115T209	2.43264e+07	1.01622e+07	1.39765e+07	Maleamate	--	C4H5NO3	--
	NEG_M115T682	1.61408e+07	4.9772e+06	4.89691e+06	--	--	--	--
	NEG_M115T756	6.24102e+06	2.13169e+06	1.81623e+07	--	--	--	--
	NEG_M115T93_1	1.42254e+07	1.13935e+07	1.11538e+07	--	--	--	--
	NEG_M115T175	1.00991e+07	2.43455e+07	1.00375e+07	--	--	--	--
	NEG_M115T93_2	2.88761e+07	4.49636e+07	4.21007e+07	--	--	--	--
	NEG_M115T273	18109.6	2.47349e+06	120676	--	--	--	--
	NEG_M116T837	9.14664e+06	1.10739e+07	1.4422e+07	--	--	--	--
	NEG_M116T31	4.96242e+06	7.3597e+06	4.2816e+06	--	--	--	--
	NEG_M116T805	1.46642e+07	6.41287e+06	7.50709e+06	--	--	--	--
	NEG_M116T81	7.70406e+07	1.05271e+08	9.95733e+07	--	--	--	--
	NEG_M116T156	2.22957e+06	6.65233e+06	9.08589e+06	--	--	--	--
	NEG_M116T761	2.43354e+07	1.56463e+07	2.03518e+07	--	--	--	--
	NEG_M116T834	1.65178e+07	1.15163e+07	1.06837e+07	--	--	--	--
	NEG_M116T794	3.8578e+07	1.34293e+07	1.37813e+07	--	--	--	--
	NEG_M116T813	1.8901e+07	1.17126e+07	1.1568e+07	--	--	--	--
	NEG_M116T728	4.01543e+07	1.18991e+07	2.68528e+07	--	--	--	--
	NEG_M116T824	2.87999e+07	1.71657e+07	2.16864e+07	--	--	--	--
	NEG_M116T741	1.38175e+07	1.84805e+07	1.42758e+07	--	--	--	--
	NEG_M116T32	1.82551e+07	4.3169e+06	1.64993e+07	--	--	--	--
	NEG_M116T103	3.19411e+07	9.82434e+07	5.71877e+07	--	--	--	--
	NEG_M116T704	34573906	2.10356e+07	2.39624e+07	--	--	--	--
	NEG_M116T779	5.97906e+07	3.09566e+07	2.09311e+07	--	--	--	--
	NEG_M116T692	2.62447e+07	2.33727e+07	5.00617e+06	--	--	--	--
	NEG_M116T681	1.90786e+07	2.07827e+08	8.31093e+07	--	--	--	--
	NEG_M116T649	1.01943e+08	1.43195e+08	6.90101e+07	4-Methylaminobutyrate	--	C5H11NO2	--
	NEG_M116T582	5.73478e+06	1.46601e+07	1.43375e+07	--	L-Valine	C5H11NO2	Carboxylic acids and derivatives
	NEG_M117T31	9.05373e+06	1.04277e+07	1.20393e+07	--	--	--	--
	NEG_M117T837	1.6013e+07	1.40245e+07	1.3948e+07	--	5-Aminopentanoic acid	C5H11NO2	Carboxylic acids and derivatives
	NEG_M117T68	1.22298e+06	1.1965e+06	2.42226e+06	--	--	--	--
	NEG_M117T130	3.05113e+07	1.18047e+07	1.36849e+07	--	--	--	--
	NEG_M117T129_1	1061605753	1725382779	2.07482e+09	Succinic acid	--	C4H6O4	Carboxylic acids and derivatives
	NEG_M117T509	2.15225e+08	7.30311e+07	1.4984e+08	--	--	--	--
	NEG_M117T483	4.31411e+07	1.93138e+07	8.36783e+07	--	--	--	--
	NEG_M117T165	6.60787e+07	1.3853e+08	8.93152e+07	--	--	--	--
	NEG_M117T432	2.02536e+07	4.33368e+07	5.42238e+07	--	--	--	--
	NEG_M117T760	3.55479e+07	5.68229e+07	7.60042e+07	--	--	--	--
	NEG_M117T620	2.17721e+07	5.64739e+07	1.00184e+08	--	--	--	--
	NEG_M117T465	1.35973e+08	3.22393e+07	4.15825e+07	Methylmalonic acid	--	C4H6O4	Carboxylic acids and derivatives
	NEG_M117T444	9.52656e+07	1.08075e+08	1.48605e+08	--	--	--	--
	NEG_M117T359	5.04427e+07	6.90742e+07	1.78153e+08	--	--	--	--
	NEG_M117T234	7.01787e+07	5.02113e+07	1.67078e+08	--	--	--	--
	NEG_M117T183	2.04889e+07	7.12034e+07	1.28552e+08	--	--	--	--
	NEG_M117T369	3.66401e+07	8.67688e+07	6.52244e+07	--	--	--	--
	NEG_M117T557	9.58012e+07	1.40345e+08	1.17273e+08	--	--	--	--
	NEG_M117T270	1.08201e+08	6.6842e+07	4.65464e+07	--	--	--	--
	NEG_M117T568	5.14173e+07	4.49562e+07	4.04096e+07	--	--	--	--
	NEG_M117T148	129446799	1.63037e+08	1.0628e+08	--	--	--	--
	NEG_M117T792	3.70527e+08	4.07613e+07	3.05013e+07	--	--	--	--
	NEG_M117T454	1.14227e+08	100373448	5.31229e+07	--	--	--	--
	NEG_M117T107	5.31253e+07	5.09188e+08	2.96726e+08	--	--	--	--
	NEG_M117T538	4.11622e+07	2.00493e+07	3.86922e+07	--	--	--	--
	NEG_M117T816	1.54587e+08	6.52989e+07	4.59605e+07	--	--	--	--
	NEG_M117T546	6.41275e+07	9.08067e+07	3.4337e+07	--	--	--	--
	NEG_M117T498	4.4442e+07	1.01571e+08	4.63852e+07	--	--	--	--
	NEG_M117T80	1.55838e+08	1.577e+08	1.29488e+08	--	--	--	--
	NEG_M117T326	1.08769e+07	1.23175e+07	1.57422e+07	--	--	--	--
	NEG_M117T345	1.00821e+07	1.22955e+07	1.22064e+07	--	Guanidinoacetate	C3H7N3O2	Carboxylic acids and derivatives
	NEG_M117T178	2.48197e+07	8.20089e+07	3.57911e+07	--	--	--	--
	NEG_M117T189	1.66603e+07	5.12603e+07	2.53927e+07	--	--	--	--
	NEG_M117T160	7.22346e+06	3.16516e+07	1.323e+07	--	--	--	--
	NEG_M117T129_2	6.3649e+06	9.62074e+06	1.41754e+07	--	--	--	--
	NEG_M118T129	4.36882e+07	6.93875e+07	8.72782e+07	--	--	--	--
	NEG_M118T583	1.04178e+07	4.21427e+07	3.84213e+07	--	--	--	--
	NEG_M118T809	1.15272e+07	3.46989e+07	3.74933e+07	--	--	--	--
	NEG_M118T41	1.03114e+07	1.23548e+07	1.49252e+07	--	2-Aminobenzoic acid	C7H7NO2	Benzene and substituted derivatives
	NEG_M118T564	1.73325e+06	3.91169e+06	3.89902e+06	--	Trigonelline	C7H7NO2	-
	NEG_M118T90	4.43014e+07	1.43596e+08	6.31174e+07	--	--	--	--
	NEG_M118T32	2.27725e+06	2.50245e+06	2.77232e+06	--	L-Homoserine	C4H9NO3	Carboxylic acids and derivatives
	NEG_M118T42	1.61917e+06	6.91926e+06	7.71495e+06	--	--	--	--
	NEG_M118T177	805546	3.88848e+06	1.45855e+06	--	--	--	--
	NEG_M119T36	1.05352e+06	804116	1.33303e+06	--	--	--	--
	NEG_M119T52	281753	453280	1.12364e+06	--	--	--	--
	NEG_M119T68	1.4356e+06	1.19364e+06	1.66236e+06	--	--	--	--
	NEG_M119T311	4.58255e+06	3.54289e+06	8.00425e+06	--	Fosfomycin	C3H7O4P	Organic phosphonic acids and derivatives
	NEG_M119T91_2	2050732777	2028445563	1.89971e+09	--	--	--	--
	NEG_M119T451	2.74617e+07	5.69084e+07	4.04305e+07	--	--	--	--
	NEG_M119T415	3.89112e+07	3.93171e+07	4.08272e+07	--	--	--	--
	NEG_M119T434	3.43778e+07	3.50198e+07	3.08063e+07	--	--	--	--
	NEG_M119T399	3.56955e+07	2.72488e+07	3.08473e+07	--	--	--	--
	NEG_M119T836	7.0945e+07	2.94666e+07	1.12442e+07	--	--	--	--
	NEG_M119T763	2.23009e+07	1.91348e+07	2.46768e+07	--	--	--	--
	NEG_M119T473	8.99998e+07	3.13911e+07	5.78228e+07	--	--	--	--
	NEG_M119T242	7.73542e+07	5.27901e+07	2.80581e+07	--	--	--	--
	NEG_M119T464	1.88104e+07	1.18128e+07	1.43006e+07	--	--	--	--
	NEG_M119T364	3.77804e+07	7.19645e+07	5.42513e+07	--	--	--	--
	NEG_M119T509	1.85885e+07	2.41786e+07	2.94566e+07	--	--	--	--
	NEG_M119T320	4.02135e+07	3.27768e+07	3.14985e+07	--	--	--	--
	NEG_M119T309	1.45154e+07	9.61944e+07	4.18156e+07	--	--	--	--
	NEG_M119T482	1.0479e+07	2.1038e+07	4.24412e+07	--	--	--	--
	NEG_M119T342	1.08262e+07	3.17199e+07	1.56506e+07	--	--	--	--
	NEG_M119T197	1.02682e+08	2.51773e+07	4.61207e+07	--	--	--	--
	NEG_M119T568	6.05757e+07	1.2989e+07	1.43419e+07	--	--	--	--
	NEG_M119T703	7.16888e+07	2.34363e+07	2.39832e+07	--	--	--	--
	NEG_M119T490	8.66323e+06	1.7103e+07	1.73177e+07	--	--	--	--
	NEG_M119T258	1.35667e+07	1.70853e+07	4.06295e+07	--	--	--	--
	NEG_M119T187	9.50237e+06	3.06721e+07	3.23324e+07	--	--	--	--
	NEG_M119T828	1.19988e+07	1.864e+07	4.67643e+07	--	--	--	--
	NEG_M119T498	3.54447e+07	1.37461e+07	2.12117e+07	--	--	--	--
	NEG_M119T533	3.79983e+07	1.33089e+07	2.5034e+07	--	--	--	--
	NEG_M119T681	2.88752e+07	1.93007e+07	3.89371e+07	--	--	--	--
	NEG_M119T233	1.36303e+07	1.24334e+07	7.84903e+07	--	--	--	--
	NEG_M119T670	1.31605e+07	1.67554e+08	6.7983e+07	--	--	--	--
	NEG_M119T820	3.96904e+07	1.99579e+07	3.23911e+07	--	--	--	--
	NEG_M119T165	3.28696e+07	5.38616e+07	3.22622e+07	3-Methylthiopropionic acid	--	C4H8O2S	Fatty Acyls
	NEG_M119T578	1.53072e+07	1.04114e+07	4.01625e+07	--	--	--	--
	NEG_M119T741	134.271	7.22201e+07	7.70256e+07	--	--	--	--
	NEG_M119T158	2.7751e+07	4.60687e+07	3.38525e+07	--	--	--	--
	NEG_M119T344	4.24993e+06	4.09903e+07	5.95798e+06	--	4-Hydroxyphenylethanol	C8H10O2	Phenols
	NEG_M119T171	4.036e+07	6.13712e+07	4.92359e+07	--	--	--	--
	NEG_M119T316	2.72833e+06	8.25484e+06	2.09629e+06	--	4-Hydroxystyrene	C8H8O	Benzene and substituted derivatives
	NEG_M119T271	4.37845e+06	9.57936e+06	5.70398e+06	--	--	--	--
	NEG_M119T92	4.50124e+06	2.37642e+06	1.05588e+06	--	--	--	--
	NEG_M120T35	840367	1.58821e+06	1.98632e+06	--	--	--	--
	NEG_M120T92	7.86088e+07	7.71439e+07	7.41974e+07	--	--	--	--
	NEG_M121T331	122235	382095	600554	--	--	--	--
	NEG_M121T86	8.30739e+06	8.75634e+06	8.50597e+06	--	--	--	--
	NEG_M121T348	6.04614e+06	2.68907e+06	4.26794e+06	--	--	--	--
	NEG_M121T178	3.85927e+06	3.68395e+06	4.29694e+06	--	--	--	--
	NEG_M121T376	2.03857e+06	5.1557e+06	4.61769e+06	--	--	--	--
	NEG_M121T198	1.40148e+06	5.81608e+06	8.81699e+06	--	--	--	--
	NEG_M121T256	2.44109e+06	4.17937e+06	2.91277e+06	--	--	--	--
	NEG_M121T164	2.58021e+06	2.74818e+06	5.10783e+06	--	--	--	--
	NEG_M121T502	2.14203e+08	3.81636e+08	2.28697e+08	Erythritol	--	C4H10O4	Organooxygen compounds
	NEG_M121T232	5.11946e+07	4.5873e+07	6.87345e+07	--	--	--	--
	NEG_M121T637	6.95976e+06	3.75291e+07	2.10078e+07	Benzoate	--	C7H6O2	Benzene and substituted derivatives
	NEG_M121T534	6.02981e+06	1.06935e+08	3.21661e+07	Phenylethylamine	--	C8H11N	Benzene and substituted derivatives
	NEG_M121T820	3.65669e+07	6.82982e+06	4.09141e+06	--	4-Hydroxybenzaldehyde	C7H6O2	Organooxygen compounds
	NEG_M121T684	4.45244e+07	8.70108e+06	5.14657e+06	--	--	--	--
	NEG_M121T92	3.46186e+07	7.06545e+06	7.77083e+06	--	--	--	--
	NEG_M121T333	3.74772e+06	3.7993e+07	1.56835e+07	--	--	--	--
	NEG_M122T394	255297887	5.34451e+07	5.29275e+07	--	--	--	--
	NEG_M122T830	3.59445e+07	2.2259e+07	1.61627e+07	--	--	--	--
	NEG_M122T250	1.35013e+07	5.04384e+07	4.52334e+07	--	--	--	--
	NEG_M122T164	3.73535e+07	6.89841e+07	4.4462e+07	Nicotinic acid	--	C6H5NO2	Carboxylic acids and derivatives
	NEG_M122T366	6.18716e+07	1.04744e+08	1.21285e+08	--	--	--	--
	NEG_M122T801	1.55751e+08	3.63893e+07	6.05991e+07	--	--	--	--
	NEG_M122T468	4.51919e+08	5.96723e+07	6.04337e+07	Picolinic acid	--	C6H5NO2	Pyridines and derivatives
	NEG_M122T600	9.43456e+07	9.74634e+07	4.34421e+07	--	--	--	--
	NEG_M122T696	1.48479e+07	2.04095e+07	2.11165e+07	--	--	--	--
	NEG_M122T714	1.91249e+07	1.26132e+07	2.20697e+07	--	--	--	--
	NEG_M122T655	3.61835e+07	1.33665e+07	2.39679e+07	--	Isonicotinic acid	C6H5NO2	Pyridines and derivatives
	NEG_M122T611	1.76333e+07	1.85885e+07	8.38698e+07	--	--	--	--
	NEG_M122T420	4.04607e+07	1.07605e+08	5.73255e+07	--	--	--	--
	NEG_M122T502	3.02534e+08	2.52782e+07	6.6756e+07	--	--	--	--
	NEG_M122T704	6.30847e+08	1.30603e+08	1.38591e+08	--	--	--	--
	NEG_M122T333	5.9598e+06	3.58418e+07	1.06917e+08	--	--	--	--
	NEG_M123T63	7.40306e+06	7.21138e+06	4.28449e+06	--	--	--	--
	NEG_M123T47	9.37021e+06	6.33852e+06	3.67504e+06	--	--	--	--
	NEG_M123T373	2.49028e+07	3.00983e+07	2.70968e+07	--	--	--	--
	NEG_M123T392	8.55543e+06	1.6587e+07	1.31355e+07	--	4-Methylcatechol	C7H8O2	Phenols
	NEG_M123T454	8359598	9.31919e+07	1.72932e+07	--	--	--	--
	NEG_M123T54	2.70152e+06	1.50782e+06	1.78462e+06	--	--	--	--
	NEG_M123T64	5.58895e+06	1.00248e+07	5.36721e+06	--	--	--	--
	NEG_M123T36	1.26435e+06	5.95974e+06	4.19695e+06	--	Ectoine	C6H10N2O2	--
	NEG_M124T449	1.64093e+07	1.67632e+07	1.47972e+06	1-Naphthylamine	--	C10H9N	--
	NEG_M124T40	5.35646e+07	3.20899e+07	2.03976e+07	--	--	--	--
	NEG_M124T300	94709760	1.33923e+08	1.71352e+08	--	--	--	--
	NEG_M124T782	1.21843e+08	1.96698e+08	4.5714e+08	--	--	--	--
	NEG_M124T444	8.44272e+07	1.16033e+08	4.50095e+07	--	--	--	--
	NEG_M124T432	2.18987e+08	2.48285e+08	4.2813e+08	--	--	--	--
	NEG_M124T65	1.35254e+08	5.81893e+08	1.68582e+09	--	--	--	--
	NEG_M124T469	1.22158e+08	9.55953e+07	1.00103e+08	--	--	--	--
	NEG_M124T334	8.16703e+07	1.05109e+08	3.49315e+08	--	--	--	--
	NEG_M124T455	113055434	1.72757e+08	8.23146e+07	--	--	--	--
	NEG_M124T595	8.17715e+07	1.12501e+08	1.47719e+08	--	--	--	--
	NEG_M124T691	2.5482e+08	9.82452e+07	6.09219e+08	--	--	--	--
	NEG_M124T398	3.35964e+08	4.69921e+08	2.17847e+08	--	--	--	--
	NEG_M124T353	1.96242e+08	3.25579e+08	4.52234e+08	--	--	--	--
	NEG_M124T620	2.14981e+08	166018558	2.77506e+08	--	--	--	--
	NEG_M124T558	9.66633e+07	1.26537e+08	9.85624e+07	--	--	--	--
	NEG_M124T669	7.43007e+08	2.92866e+08	5.49212e+07	--	--	--	--
	NEG_M124T581	224670799	1.88061e+08	1.71158e+08	--	--	--	--
	NEG_M124T321	4.00283e+08	4.03288e+08	1.82864e+08	--	--	--	--
	NEG_M124T569	1.06925e+08	1.73968e+08	1.81071e+08	--	--	--	--
	NEG_M124T211	1.24535e+08	118165260	1.78911e+08	--	--	--	--
	NEG_M124T743	134.271	3.4562e+08	6.79442e+08	--	--	--	--
	NEG_M124T725	6.3523e+07	8.00836e+07	3.16275e+08	--	--	--	--
	NEG_M124T702	1.55083e+08	2.427e+08	4.80711e+07	--	--	--	--
	NEG_M124T173	8.28297e+08	2.18781e+08	3.16046e+08	--	--	--	--
	NEG_M124T603	3.75499e+07	1.04636e+08	2.11173e+08	--	--	--	--
	NEG_M124T491	4.68994e+08	2.51191e+08	7.56343e+07	--	--	--	--
	NEG_M124T45	997507	1.2287e+06	2.58969e+06	--	--	--	--
	NEG_M125T103	4.75921e+06	7.41567e+06	4.29647e+06	--	--	--	--
	NEG_M125T118	2.49053e+06	1.11749e+07	1.2092e+07	Caprylic acid	--	C8H16O2	Fatty Acyls
	NEG_M125T93	1.31803e+08	1.5165e+08	1.45805e+08	--	--	--	--
	NEG_M125T320	2.95337e+07	3.85545e+07	3.37911e+07	--	--	--	--
	NEG_M125T533	4.63482e+06	2.34351e+07	1.5276e+07	--	--	--	--
	NEG_M125T491	2.92958e+06	1.66357e+07	1.29412e+07	--	--	--	--
	NEG_M125T249	7.63693e+06	1.01004e+07	1.91116e+07	Ciliatine	--	C2H8NO3P	Organic phosphonic acids and derivatives
	NEG_M125T460	3.2264e+06	1.09737e+07	1.95687e+07	--	--	--	--
	NEG_M125T833	1.35352e+07	1.0163e+07	1.7771e+07	--	--	--	--
	NEG_M125T791	8.30393e+06	8.38109e+06	2.7952e+07	--	--	--	--
	NEG_M125T821	1.82417e+07	7.8468e+06	1.84102e+06	--	--	--	--
	NEG_M125T723	1.54177e+07	1.14309e+07	1.33088e+07	--	--	--	--
	NEG_M125T691	4.15525e+07	1.69295e+07	3.05263e+07	--	--	--	--
	NEG_M125T634	2.3348e+07	9.29932e+06	2.13096e+07	--	--	--	--
	NEG_M125T679	5.42414e+06	3.43582e+07	1.29085e+07	--	Imidazoleacetic acid	C5H6N2O2	Azoles
	NEG_M125T670	1.0894e+07	2.33017e+07	2.23155e+07	--	--	--	--
	NEG_M125T649	2.00736e+06	7.4533e+06	1.03007e+07	--	--	--	--
	NEG_M125T779	3.31636e+07	1.1214e+07	7.21665e+06	--	--	--	--
	NEG_M126T31	538270	1.24535e+06	652314	--	--	--	--
	NEG_M126T43	3.44699e+06	2.25155e+06	2.39702e+06	--	--	--	--
	NEG_M126T68_1	1.36671e+06	3.42572e+06	3.65325e+06	--	--	--	--
	NEG_M126T97	1.2232e+07	1.01372e+07	6.81995e+06	--	--	--	--
	NEG_M126T39	134.271	7.47127e+06	6.4554e+06	--	1,2,3-Trihydroxybenzene	C6H6O3	Benzene and substituted derivatives
	NEG_M126T64	2.5858e+07	4.5409e+06	9.92071e+06	--	--	--	--
	NEG_M126T38	882702	4.01987e+06	1.54212e+06	--	--	--	--
	NEG_M126T68_2	1.06544e+06	938009	1.23683e+06	--	--	--	--
	NEG_M127T836	2.37303e+07	1.02502e+07	9.31703e+06	--	--	--	--
	NEG_M127T648	1.52509e+06	3.41737e+06	2.54867e+06	--	--	--	--
	NEG_M127T103	9.03845e+06	1.06628e+07	1.0307e+07	--	--	--	--
	NEG_M127T64	1.5764e+07	1.08038e+07	1.4542e+07	--	--	--	--
	NEG_M127T102	6.50006e+06	2.52232e+07	1.00324e+07	--	--	--	--
	NEG_M127T237	3.46905e+07	3.7685e+07	8.60622e+07	Adipic acid	--	C6H10O4	Fatty Acyls
	NEG_M127T232	8.94587e+06	3.90354e+06	7.78735e+06	--	--	--	--
	NEG_M127T389	71511.4	1.1319e+07	86901.7	--	Cyclohexane-1-carboxylate	C7H12O2	Carboxylic acids and derivatives
	NEG_M128T54	1.03757e+08	3.22782e+06	656778	--	--	--	--
	NEG_M128T37	4.94211e+07	1.18435e+07	8.85454e+06	--	--	--	--
	NEG_M128T837	2.95486e+08	1.4952e+08	1.51149e+08	--	--	--	--
	NEG_M128T108	203921844	8.07334e+07	1.9318e+08	--	--	--	--
	NEG_M128T165	105910406	3.18748e+08	2.94539e+08	--	--	--	--
	NEG_M128T828	4.26457e+07	1.75466e+08	1.42786e+08	--	--	--	--
	NEG_M128T178	3.2631e+08	9.39007e+07	2.06615e+08	--	O-Acetylserine	C5H9NO4	Carboxylic acids and derivatives
	NEG_M128T244	2.00903e+08	2.48215e+08	2.86538e+08	Pyroglutamic acid	--	C5H7NO3	Carboxylic acids and derivatives
	NEG_M128T334	1.45524e+08	1.47149e+08	3.59871e+08	--	--	--	--
	NEG_M128T541	2.42404e+08	1.52561e+08	1.78924e+08	--	Pyrrolidonecarboxylic acid	C5H7NO3	Carboxylic acids and derivatives
	NEG_M128T648	2.87956e+07	6.70599e+07	1.18091e+08	--	--	--	--
	NEG_M128T366	1.48635e+08	9.77595e+07	2.74214e+08	--	--	--	--
	NEG_M128T480	7.73885e+08	7.33094e+07	7.40744e+07	--	--	--	--
	NEG_M128T497	5.63567e+07	1.16296e+08	1.41141e+08	--	--	--	--
	NEG_M128T726	506879627	1.51667e+08	3.47438e+08	--	--	--	--
	NEG_M128T279	1.33414e+08	8.97314e+07	8.79284e+08	--	--	--	--
	NEG_M128T116	7.30206e+07	2.25657e+08	9.97215e+07	--	N-Methyl-D-aspartic acid	C5H9NO4	Carboxylic acids and derivatives
	NEG_M128T415	205331014	6.59463e+07	6.50617e+07	--	--	--	--
	NEG_M128T817	4.33834e+08	2.14298e+08	2.59684e+08	--	--	--	--
	NEG_M128T64	912950	1.1796e+06	931581	--	--	--	--
	NEG_M128T47	739861	2.42218e+06	2.5486e+06	--	--	--	--
	NEG_M129T88	3.26823e+08	2.87154e+08	1.60983e+08	--	Heptanoic acid	C7H14O2	Fatty Acyls
	NEG_M129T107	8.50492e+07	8.25862e+07	8.10952e+07	--	--	--	--
	NEG_M129T102_1	3.40116e+06	3.25051e+06	4.01243e+06	--	--	--	--
	NEG_M129T102_2	8.40453e+08	765868071	8.47783e+08	--	--	--	--
	NEG_M129T87	7.37129e+08	8.19212e+08	1.09229e+09	--	--	--	--
	NEG_M129T136_2	6.4615e+08	391713779	6.06425e+08	--	D-2-Hydroxyglutaric acid	C5H8O5	Hydroxy acids and derivatives
	NEG_M129T617	1.34081e+08	5.43655e+07	8.10587e+07	--	--	--	--
	NEG_M129T270	1.65556e+08	4.32633e+07	1.2528e+08	--	--	--	--
	NEG_M129T300	7.79105e+07	6.7848e+07	2.05358e+08	--	--	--	--
	NEG_M129T671	193736718	8.35569e+07	3.63934e+07	--	--	--	--
	NEG_M129T465	1.9845e+08	123750761	1.96679e+08	Citramalic acid	--	C5H8O5	Fatty Acyls
	NEG_M129T594	5.03273e+07	8.77277e+07	1.00179e+08	(E)-Glutaconate	--	C5H6O4	Carboxylic acids and derivatives
	NEG_M129T473	2.34753e+07	3.69003e+07	1.01203e+08	--	--	--	--
	NEG_M129T384	7.43762e+07	9.69539e+06	3.83993e+07	--	--	--	--
	NEG_M129T772	5.52424e+07	3.23556e+07	1.81284e+08	--	--	--	--
	NEG_M129T646	7.85886e+07	2.93657e+07	6.06347e+07	--	--	--	--
	NEG_M129T200	4.94335e+07	9.51665e+07	7.54114e+07	Itaconate	--	C5H6O4	Fatty Acyls
	NEG_M129T119_2	1.38125e+08	1.61097e+08	1.8509e+08	--	Cyanuric acid	C3H3N3O3	Triazines
	NEG_M129T827	134.271	8.88131e+07	1.52696e+08	--	--	--	--
	NEG_M129T510	6.13297e+08	4.38081e+07	1.17705e+08	--	--	--	--
	NEG_M129T583	1.07298e+08	5.35242e+07	4.02224e+07	--	--	--	--
	NEG_M129T720	5.57864e+07	1.11269e+08	1.14645e+08	--	--	--	--
	NEG_M129T810	7.42108e+07	9.54745e+07	7.41268e+07	--	--	--	--
	NEG_M129T567	1.45498e+08	2.59289e+07	5.93575e+07	Citraconic acid	--	C5H6O4	Fatty Acyls
	NEG_M129T704	134.271	2.78234e+07	3.30951e+07	--	--	--	--
	NEG_M129T690	8.62931e+07	5.3811e+07	1.6879e+08	--	--	--	--
	NEG_M129T575	1.0006e+07	1.0006e+08	4.13038e+07	--	--	--	--
	NEG_M129T348	3.48288e+07	5.86494e+07	3.63042e+07	--	--	--	--
	NEG_M129T336	3.62614e+07	5.17257e+07	4.08988e+07	Adipate semialdehyde	--	C6H10O3	Fatty Acyls
	NEG_M129T202	1.70953e+07	2.76786e+07	2.17397e+07	--	--	--	--
	NEG_M129T263	1.41444e+08	1.91783e+08	1.29995e+08	--	--	--	--
	NEG_M129T102_3	4.35908e+06	4.13263e+06	4.12533e+06	--	--	--	--
	NEG_M129T136_3	2.19431e+06	1.66529e+06	2.34583e+06	--	--	--	--
	NEG_M130T42	1.90071e+06	2.45224e+06	1.89766e+06	--	3-Methylindole	C9H9N	Indoles and derivatives
	NEG_M130T102	4.1431e+07	3.80491e+07	4.29724e+07	--	Creatine	C4H9N3O2	Carboxylic acids and derivatives
	NEG_M130T87	3.46053e+07	2.79239e+07	5.00994e+07	--	--	--	--
	NEG_M130T136	1.75274e+07	1.65911e+07	2.31323e+07	--	Fluorouracil	C4H3FN2O2	Diazines
	NEG_M130T33	488427	958262	1.0772e+06	--	--	--	--
	NEG_M130T40	1.7715e+06	1.96012e+06	1.66719e+06	--	--	--	--
	NEG_M130T336	2.17933e+06	1.86272e+06	3.57966e+06	--	--	--	--
	NEG_M130T263	7.93194e+06	1.06403e+07	6.92035e+06	--	--	--	--
	NEG_M130T32	4.05109e+07	3.76411e+07	3.89828e+07	--	(3R)-beta-Leucine	C6H13NO2	--
	NEG_M130T189	5.3811e+07	2.39637e+08	1.47772e+08	--	--	--	--
	NEG_M130T178	5.17676e+07	2.27983e+08	9.71459e+07	L-Isoleucine	--	C6H13NO2	Carboxylic acids and derivatives
	NEG_M130T224	6.74944e+06	8.45712e+07	2.26583e+07	L-Leucine	--	C6H13NO2	Carboxylic acids and derivatives
	NEG_M130T821	1.43701e+08	2.96359e+07	1.56658e+08	--	--	--	--
	NEG_M130T720	6.7422e+07	2.98347e+07	3.73078e+07	--	--	--	--
	NEG_M130T833	8.43785e+07	2.46077e+08	1.33468e+08	--	--	--	--
	NEG_M130T659	134.271	4.20694e+07	3.75963e+07	--	--	--	--
	NEG_M130T349	134.271	5.35035e+07	2.0584e+07	--	--	--	--
	NEG_M130T413	2.6782e+06	2.42083e+07	7.8513e+07	--	--	--	--
	NEG_M130T431	2.15083e+07	2.868e+07	1.05196e+07	--	Leucine	C6H13NO2	Carboxylic acids and derivatives
	NEG_M130T372	2.39197e+07	6.8455e+07	4.74138e+07	--	--	--	--
	NEG_M130T571	3.47128e+07	4.35681e+07	3.48387e+07	--	--	--	--
	NEG_M130T554	134.271	2.58087e+07	2.69792e+07	--	--	--	--
	NEG_M130T500	7.21232e+07	2.00847e+07	2.43954e+07	--	--	--	--
	NEG_M131T92	97195577	5.47245e+07	4.39323e+07	--	--	--	--
	NEG_M131T107	4.81086e+07	3.5873e+07	3.71443e+07	--	--	--	--
	NEG_M131T79	1.46147e+07	1.38434e+07	1.57736e+07	--	--	--	--
	NEG_M131T171	3.11711e+06	4.17718e+06	1.28838e+07	--	--	--	--
	NEG_M131T102	7.70469e+06	3.4587e+06	5.26901e+07	--	--	--	--
	NEG_M131T541	4.85703e+07	5.10875e+07	6.95386e+07	--	--	--	--
	NEG_M131T441	5.46177e+07	7.95715e+07	8.90993e+07	--	--	--	--
	NEG_M131T283	4.57028e+08	1.77113e+08	1.81276e+08	--	--	--	--
	NEG_M131T159	1.17995e+08	1.59387e+08	1.12996e+08	Glutaric acid	--	C5H8O4	Carboxylic acids and derivatives
	NEG_M131T771	1.75356e+08	4.68518e+07	9.78741e+07	--	--	--	--
	NEG_M131T383	1.99447e+08	1.02302e+08	5.79646e+07	--	--	--	--
	NEG_M131T593	3.37027e+07	1.51215e+08	1.08224e+08	--	--	--	--
	NEG_M131T825	3.56018e+07	1.00612e+08	7.77503e+07	--	--	--	--
	NEG_M131T212	4.13507e+07	2.9704e+07	6.11966e+07	--	D-Xylose	C5H10O5	Organooxygen compounds
	NEG_M131T416	3.38057e+07	3.28568e+07	1.74688e+07	--	--	--	--
	NEG_M131T793	6.45134e+07	3.28981e+07	3.98876e+07	--	--	--	--
	NEG_M131T780	31502198	1.0715e+08	1.3422e+08	--	--	--	--
	NEG_M131T370	2.88286e+07	8.11078e+07	9.80364e+07	--	--	--	--
	NEG_M131T559	3.41965e+07	159743030	8.83366e+07	--	--	--	--
	NEG_M131T801	1.52199e+07	6.38541e+07	2.56915e+07	--	--	--	--
	NEG_M131T472	1.16708e+08	7.647e+07	7.50464e+07	--	--	--	--
	NEG_M131T348	4.62521e+07	2.80318e+08	1.15265e+08	--	--	--	--
	NEG_M131T399	1.42454e+07	3.82125e+07	8.15244e+07	--	--	--	--
	NEG_M131T334	2.1194e+07	1.0059e+08	2.25647e+08	--	--	--	--
	NEG_M131T259	1495711938	8.50373e+07	3.8484e+07	--	--	--	--
	NEG_M131T178_1	5.74189e+08	1.13057e+08	1.30995e+08	--	--	--	--
	NEG_M131T359	9.43805e+07	2.26672e+07	2.54106e+07	--	--	--	--
	NEG_M131T323	1.86579e+08	196465233	1.38621e+08	--	--	--	--
	NEG_M131T690	4.53211e+08	2.79395e+07	2.53159e+07	--	--	--	--
	NEG_M131T93	7.88669e+08	8.14734e+08	8.49522e+08	--	--	--	--
	NEG_M131T745	9.2428e+07	6.20357e+07	9.73981e+07	--	--	--	--
	NEG_M131T426	5.5826e+06	1.39372e+07	9.112e+06	--	Beta-Guanidinopropionic acid	C4H9N3O2	Organonitrogen compounds
	NEG_M131T187	9.33918e+06	8.24814e+06	1.07089e+07	--	6-Hydroxyhexanoic acid	C6H12O3	Hydroxy acids and derivatives
	NEG_M131T293	3.85349e+07	1.75893e+08	5.36818e+07	--	--	--	--
	NEG_M131T307	3.32978e+07	1.26893e+08	4.42029e+07	--	--	--	--
	NEG_M131T32	1.55912e+06	2.15717e+06	4.01815e+06	--	Thymol	C10H14O	Prenol lipids
	NEG_M131T51	780958	714031	995646	--	--	--	--
	NEG_M131T189	2.61249e+06	1.46852e+07	1.15335e+07	--	4-tert-Butylphenol	C10H14O	Benzene and substituted derivatives
	NEG_M131T178_2	1.53297e+06	1.3134e+07	4.40102e+06	--	--	--	--
	NEG_M131T65	1.3678e+07	2.35208e+06	1.57715e+06	--	--	--	--
	NEG_M131T834	1.91555e+06	1.28812e+06	4.17158e+06	--	--	--	--
	NEG_M132T84	1.13657e+08	2.61417e+08	1.99105e+08	--	--	--	--
	NEG_M132T293	1.74297e+06	1.00553e+07	2.67075e+06	--	--	--	--
	NEG_M132T307	1.18507e+06	6.42165e+06	1.9948e+06	--	--	--	--
	NEG_M133T579	2.03011e+07	3.05248e+07	1.02171e+07	--	--	--	--
	NEG_M133T816	8.03894e+06	3.7809e+07	7.7305e+06	--	--	--	--
	NEG_M133T787	7.2839e+06	2.67564e+07	7.37767e+06	--	--	--	--
	NEG_M133T688	7.74803e+06	2.44931e+07	9.21523e+06	--	--	--	--
	NEG_M133T697	3.96473e+07	5.09745e+07	9.24728e+06	--	--	--	--
	NEG_M133T729	6.30625e+07	1.41847e+07	2.58748e+06	--	--	--	--
	NEG_M133T671	7.5797e+06	2.30268e+07	7.47573e+06	--	--	--	--
	NEG_M133T621	2.83027e+07	4.11912e+07	4.72368e+06	--	--	--	--
	NEG_M133T559	9.84739e+06	2.88542e+07	3.47425e+06	--	--	--	--
	NEG_M133T569	7.54456e+06	2.3695e+08	2.83545e+07	--	--	--	--
	NEG_M133T431	134.271	1.09777e+08	8.06443e+06	--	--	--	--
	NEG_M133T801_1	6.73591e+07	3.51704e+07	6.88289e+06	--	--	--	--
	NEG_M133T647_1	1.54379e+07	6.16153e+07	6.77182e+06	--	--	--	--
	NEG_M133T601	1.56347e+07	3.9439e+07	1.1831e+07	--	--	--	--
	NEG_M133T32	1.18279e+06	2.11089e+06	2.88255e+06	--	--	--	--
	NEG_M133T81_1	2.34472e+08	4.12982e+08	4.0732e+08	--	--	--	--
	NEG_M133T505	8.29506e+07	8.50061e+07	6.74313e+07	--	--	--	--
	NEG_M133T324	1.25544e+08	1.42572e+08	1.29016e+08	--	--	--	--
	NEG_M133T81_2	47326864708	64510440655	5.87014e+10	L-Malic acid	--	C4H6O5	Hydroxy acids and derivatives
	NEG_M133T374	5.98918e+07	1.03443e+08	9.1498e+07	--	--	--	--
	NEG_M133T612	1.06478e+08	6.15513e+07	6.22599e+07	--	--	--	--
	NEG_M133T437	5.12967e+07	7.64988e+07	6.32699e+07	--	--	--	--
	NEG_M133T308	1.04315e+08	5.08317e+07	1.88625e+08	--	--	--	--
	NEG_M133T531	6.95116e+07	4.53472e+07	3.98528e+07	--	--	--	--
	NEG_M133T206	1.41249e+08	196165544	1.34901e+08	--	--	--	--
	NEG_M133T587	3.54758e+07	6.46362e+07	1.43068e+08	--	--	--	--
	NEG_M133T552	3.97658e+07	5.2551e+07	1.53807e+08	--	--	--	--
	NEG_M133T364_1	7.40393e+07	9.32416e+07	7.90618e+07	--	--	--	--
	NEG_M133T578	3.87409e+07	5.18602e+07	2.71208e+07	--	--	--	--
	NEG_M133T389	5.5794e+07	1.34836e+08	1.72081e+08	--	--	--	--
	NEG_M133T662	4.99172e+07	7.71917e+07	8.12004e+07	--	--	--	--
	NEG_M133T416	4.3319e+07	1.20471e+08	2.27104e+08	--	--	--	--
	NEG_M133T132	1.33366e+08	9.18098e+08	8.21528e+08	--	--	--	--
	NEG_M133T248	1.28258e+08	2.42662e+08	1.96334e+08	--	--	--	--
	NEG_M133T103	2249172481	2920189556	4.96637e+08	--	--	--	--
	NEG_M133T163	4.85156e+08	4.03818e+08	3.75799e+08	--	--	--	--
	NEG_M133T447	6.34322e+07	5.37068e+07	1.29036e+08	--	--	--	--
	NEG_M133T541	1.40502e+08	340620243	1.17437e+08	--	--	--	--
	NEG_M133T805	1.23238e+08	1.40241e+08	7.71877e+07	--	--	--	--
	NEG_M133T647_2	6.49806e+07	6.29815e+07	8.92585e+07	--	--	--	--
	NEG_M133T682	24136222	6.84029e+07	1.41016e+08	--	--	--	--
	NEG_M133T344	6.32499e+07	9.5471e+07	7.47143e+07	--	--	--	--
	NEG_M133T465_1	4.73302e+07	5.34692e+07	5.96561e+07	--	--	--	--
	NEG_M133T568	7.93871e+07	7.46365e+07	2.98368e+07	--	--	--	--
	NEG_M133T271	1294063173	144486856	1.45195e+08	--	--	--	--
	NEG_M133T289	1.60855e+08	2.72921e+07	1.27689e+08	--	Malate	C4H6O5	Hydroxy acids and derivatives
	NEG_M133T626	3.41048e+07	9.30456e+07	9.02062e+07	--	--	--	--
	NEG_M133T693	1.91129e+07	5.8224e+07	5.42136e+07	--	--	--	--
	NEG_M133T826	3.48776e+07	2.52646e+07	1.31158e+08	--	--	--	--
	NEG_M133T298	6.39683e+07	3.94568e+08	1.22484e+08	--	--	--	--
	NEG_M133T352	4.01865e+07	5.02121e+07	2.02837e+08	--	--	--	--
	NEG_M133T429	7.34711e+07	3.46772e+07	1.99917e+07	--	--	--	--
	NEG_M133T713	6.76814e+07	1.44139e+08	2.57781e+08	--	--	--	--
	NEG_M133T209	3.45406e+07	6.35052e+07	6.21979e+07	--	D-Arabitol	C5H12O5	Organooxygen compounds
	NEG_M133T134	1.25205e+08	2.49068e+08	2.53686e+08	D-Xylitol	--	C5H12O5	Organooxygen compounds
	NEG_M133T286	5.56867e+07	6.04986e+07	6.22677e+07	Mandelonitrile	--	C8H7NO	Benzene and substituted derivatives
	NEG_M133T250	5.30946e+07	4.16511e+07	4.01449e+07	--	--	--	--
	NEG_M133T819	7.32449e+06	1.81219e+07	1.76464e+07	--	--	--	--
	NEG_M133T836	8.30481e+06	9.70755e+06	9.10954e+06	--	--	--	--
	NEG_M133T225	2.24546e+07	3.93596e+07	3.22164e+07	--	--	--	--
	NEG_M133T316	2.38861e+07	2.74669e+07	2.32806e+07	--	--	--	--
	NEG_M133T692	1.50219e+07	1.64341e+07	1.65571e+07	--	--	--	--
	NEG_M133T415	1.0534e+07	1.725e+07	1.90682e+07	--	--	--	--
	NEG_M133T395	6.6699e+06	2.13532e+07	6.82837e+07	--	--	--	--
	NEG_M133T497	1.93984e+07	2.11904e+07	1.82389e+07	--	--	--	--
	NEG_M133T430	1.24952e+07	1.41441e+07	3.32779e+07	--	--	--	--
	NEG_M133T558	1.24839e+07	2.02404e+07	1.59228e+07	--	--	--	--
	NEG_M133T791	1.20441e+07	1.19081e+07	1.31089e+07	--	--	--	--
	NEG_M133T738	2.7889e+07	2.47293e+07	1.80303e+07	--	--	--	--
	NEG_M133T603	1.24678e+07	1.09257e+07	2.54807e+07	--	--	--	--
	NEG_M133T521	1.21181e+07	2.34731e+07	3.57459e+07	--	--	--	--
	NEG_M133T455	1.32665e+07	2.8203e+07	1.4776e+07	--	--	--	--
	NEG_M133T442	1.41161e+07	1.94281e+07	2.18297e+07	--	--	--	--
	NEG_M133T178	3.36468e+07	6.83666e+07	5.89831e+07	--	--	--	--
	NEG_M133T329	3.1728e+07	3.16776e+07	1.79974e+07	--	--	--	--
	NEG_M133T364_2	2.12003e+07	3.01803e+07	2.09891e+07	--	--	--	--
	NEG_M133T465_2	1.69467e+07	1.79972e+07	1.36814e+07	--	--	--	--
	NEG_M133T801_2	1.35611e+07	1.46265e+07	1.85835e+07	--	--	--	--
	NEG_M133T550	1.28753e+07	1.30799e+07	2.26123e+07	--	--	--	--
	NEG_M133T704	7.74151e+06	1.07089e+07	2.32215e+07	--	--	--	--
	NEG_M133T540	2.40661e+07	1.50918e+07	1.09078e+07	--	--	--	--
	NEG_M133T378	1.16274e+08	2.05194e+07	2.43067e+07	--	--	--	--
	NEG_M133T596	1.07799e+07	1.63712e+07	1.73302e+07	--	--	--	--
	NEG_M133T351	1.37058e+07	2.61158e+07	3.95328e+07	--	Ribitol	C5H12O5	Organooxygen compounds
	NEG_M133T301	2.05616e+07	3.05731e+07	3.01294e+07	--	--	--	--
	NEG_M133T720	2.70641e+07	1.88484e+07	1.33354e+07	--	--	--	--
	NEG_M133T152	3.19724e+07	3.9175e+07	4.68617e+07	--	--	--	--
	NEG_M133T678	1.97372e+07	2.79732e+07	2.25181e+07	--	--	--	--
	NEG_M133T484	1.49096e+07	1.55446e+07	2.22876e+07	--	--	--	--
	NEG_M133T619	1.61995e+07	1.51563e+07	1.98597e+07	--	--	--	--
	NEG_M133T512	1.73811e+07	1.44083e+07	1.35562e+07	--	--	--	--
	NEG_M133T190	1.92956e+07	5.05733e+07	4.80952e+07	--	--	--	--
	NEG_M133T782	1.27612e+07	1.30607e+07	1.721e+07	--	4-Hydroxybenzeneacetonitrile	C8H7NO	Benzene and substituted derivatives
	NEG_M133T343	1.87747e+07	4.40884e+07	2.32999e+07	--	--	--	--
	NEG_M133T234	4.2282e+07	3.11091e+07	3.38318e+07	--	--	--	--
	NEG_M133T97	134.271	5.65354e+08	4.605e+08	--	--	--	--
	NEG_M133T762	1.25727e+07	1.75778e+07	1.57221e+07	--	--	--	--
	NEG_M133T81_3	2.88227e+08	3.77923e+08	3.4021e+08	--	--	--	--
	NEG_M134T299_1	6.33994e+06	6.77619e+07	4.61917e+06	--	--	--	--
	NEG_M134T81	1859652936	2835242777	2.56561e+09	--	--	--	--
	NEG_M134T103	134.271	1.05227e+08	9.76538e+07	--	--	--	--
	NEG_M134T201	7.20721e+06	9.23254e+06	1.11246e+07	--	--	--	--
	NEG_M134T155	2.08618e+06	3.95324e+06	6.10481e+06	--	--	--	--
	NEG_M134T139	4.32391e+06	3.24022e+06	5.45966e+06	--	--	--	--
	NEG_M134T299_2	8.92832e+08	8.41049e+08	8.14524e+08	Adenine	--	C5H5N5	Imidazopyrimidines
	NEG_M134T345	1.05365e+07	7.34787e+06	2.04758e+07	--	--	--	--
	NEG_M134T98	6.40038e+06	1.58588e+07	1.40621e+07	--	--	--	--
	NEG_M134T134	1.10426e+06	1.10039e+07	1.08418e+07	--	--	--	--
	NEG_M134T299_3	3.86231e+06	2.54163e+06	5.33118e+06	--	(R)-Amphetamine	C9H13N	Benzene and substituted derivatives
	NEG_M135T578	3.04712e+07	2.34664e+07	1.96388e+06	--	--	--	--
	NEG_M135T452	3.49095e+07	1.81563e+07	1.42886e+06	--	--	--	--
	NEG_M135T598	5.03414e+07	2.87506e+07	2.28673e+06	--	--	--	--
	NEG_M135T524	2.89947e+07	1.4221e+07	1.31136e+06	--	--	--	--
	NEG_M135T32_1	3.94831e+07	3.7444e+07	4.74386e+07	--	--	--	--
	NEG_M135T62	3.93667e+07	2.36793e+07	2.47891e+07	--	--	--	--
	NEG_M135T837	1.16312e+08	7.4296e+06	1.10343e+07	--	--	--	--
	NEG_M135T829	5.01166e+07	1.29708e+07	8.45353e+07	--	--	--	--
	NEG_M135T763	5.03271e+07	1.52364e+07	4.91102e+07	--	--	--	--
	NEG_M135T802	1.17485e+07	1.35731e+07	2.20224e+07	--	--	--	--
	NEG_M135T86_1	6203031238	7.41622e+07	5.0751e+06	--	--	--	--
	NEG_M135T553	3.61897e+07	7.45854e+07	4.18948e+07	--	--	--	--
	NEG_M135T81	4.40185e+08	6.73542e+08	5.95556e+08	--	Diethylphosphate	C4H11O4P	Organic phosphoric acids and derivatives
	NEG_M135T86_2	4591945099	2145460371	3.57377e+09	Threonic acid	--	C4H8O5	Organooxygen compounds
	NEG_M135T528	8.29811e+07	1.59434e+08	8.22405e+07	--	--	--	--
	NEG_M135T611	4.22776e+07	4.13872e+07	4.68525e+07	Phenyl acetate	--	C8H8O2	Phenol esters
	NEG_M135T93	8.50223e+07	1.33042e+08	1.68891e+08	--	--	--	--
	NEG_M135T239	2.6156e+08	4.31071e+07	7.26229e+07	--	--	--	--
	NEG_M135T557	2.01744e+07	2.21407e+07	2.68226e+07	2-Methylbenzoic acid	--	C8H8O2	Benzene and substituted derivatives
	NEG_M135T155	4.27449e+07	2.34969e+07	9.49128e+07	--	--	--	--
	NEG_M135T472	3.13576e+07	1.8191e+07	4.91609e+07	--	Toluate	C8H8O2	Benzene and substituted derivatives
	NEG_M135T357	8.40049e+07	2.54951e+07	3.38969e+07	--	--	--	--
	NEG_M135T825	2.76612e+07	3.90861e+07	1.82875e+07	--	--	--	--
	NEG_M135T567	9.37045e+07	1.85012e+07	2.64198e+07	--	--	--	--
	NEG_M135T745	3.66862e+07	1.67868e+07	1.29855e+07	--	--	--	--
	NEG_M135T137	4.98909e+08	1.46274e+08	8.41706e+07	--	--	--	--
	NEG_M135T762	2.0337e+07	2.02069e+07	2.0462e+07	--	--	--	--
	NEG_M135T168	2.07102e+07	4.90191e+07	2.63751e+07	--	--	--	--
	NEG_M135T716	1.98938e+07	4.10435e+07	3.94025e+07	--	--	--	--
	NEG_M135T340	3.28864e+07	1.77442e+07	1.56199e+06	--	--	--	--
	NEG_M135T102	425138	1.25212e+07	1.00315e+06	--	--	--	--
	NEG_M136T32_1	4.23699e+06	3.90971e+06	5.17582e+06	--	--	--	--
	NEG_M136T63	2.55022e+06	2.06958e+06	2.22272e+06	--	--	--	--
	NEG_M136T32_2	1.94119e+06	2.32351e+06	2.93502e+06	--	--	--	--
	NEG_M136T86	1.88016e+08	8.41147e+07	1.46026e+08	--	--	--	--
	NEG_M136T363	9.26506e+06	1.17758e+07	1.20947e+07	--	Hypoxanthine	C5H4N4O	Imidazopyrimidines
	NEG_M136T465	772044	5.87319e+06	1.00786e+06	--	--	--	--
	NEG_M136T528	3.18014e+06	1.2826e+07	6.71321e+06	--	L-Histidine	C6H9N3O2	Carboxylic acids and derivatives
	NEG_M137T31	3.30514e+06	7.65566e+06	4.28591e+06	--	--	--	--
	NEG_M137T453	2.39243e+06	9.35056e+06	333067	--	--	--	--
	NEG_M137T32	1.17368e+07	1.15622e+07	1.49065e+07	--	--	--	--
	NEG_M137T803	1.5021e+07	1.35795e+06	6.44633e+06	--	--	--	--
	NEG_M137T434_1	4.86515e+06	3.69299e+06	9.72807e+07	--	--	--	--
	NEG_M137T297	3.18827e+06	5.13062e+06	6.7103e+06	--	--	--	--
	NEG_M137T434_2	8.62369e+08	9.84829e+08	7.04167e+08	3,4-Dihydroxybenzaldehyde	--	C7H6O3	Benzene and substituted derivatives
	NEG_M137T473	8.70664e+07	1.33977e+08	1.00423e+08	--	--	--	--
	NEG_M137T380_1	3.60937e+08	2443923392	6.14727e+08	Salicylic acid	--	C7H6O3	Benzene and substituted derivatives
	NEG_M137T542	8.7646e+07	1.04367e+08	7.8376e+07	3-Hydroxybenzoic acid	--	C7H6O3	Benzene and substituted derivatives
	NEG_M137T291	8.64217e+07	1.84533e+08	1.32302e+08	--	--	--	--
	NEG_M137T793	2.91129e+07	8.09518e+07	5.11999e+07	--	--	--	--
	NEG_M137T484	3.19612e+07	1.48691e+08	1.48521e+08	--	--	--	--
	NEG_M137T215	8.6971e+07	3.41541e+08	1.21081e+08	--	--	--	--
	NEG_M137T807	4.12648e+07	5.9238e+07	2.63329e+07	--	--	--	--
	NEG_M137T665	7.55828e+07	7.552e+07	8.13e+07	--	--	--	--
	NEG_M137T654	8.0005e+06	1.81866e+08	1.56107e+08	--	--	--	--
	NEG_M137T677	2.89402e+07	6.88699e+07	4.91387e+07	--	--	--	--
	NEG_M137T625	3.00571e+07	1.51277e+08	1.1782e+08	--	--	--	--
	NEG_M137T605	2.38692e+07	1.18371e+07	6.57422e+07	--	--	--	--
	NEG_M137T184	9.74502e+06	1.64831e+07	4.64399e+07	Urocanic acid	--	C6H6N2O2	Azoles
	NEG_M137T70	2.58202e+08	2.3749e+06	1.91578e+07	--	--	--	--
	NEG_M137T511	7.22763e+07	3.53236e+07	5.59026e+07	--	--	--	--
	NEG_M137T520	1.25006e+07	1.39458e+08	8.57657e+07	--	--	--	--
	NEG_M137T496	6.63627e+07	8.14281e+07	6.573e+07	4-Hydroxybenzoic acid	--	C7H6O3	Benzene and substituted derivatives
	NEG_M137T86	4.01061e+07	1.77802e+07	3.01357e+07	--	--	--	--
	NEG_M137T521	888870	7.506e+06	1.45976e+06	--	Isoniazid	C6H7N3O	Pyridines and derivatives
	NEG_M137T434_3	1.97554e+06	6.37276e+06	2.93105e+06	--	1-Methylnicotinamide	C7H9N2O	Pyridines and derivatives
	NEG_M138T32	863374	1.086e+06	1.24947e+06	--	--	--	--
	NEG_M138T620	4.56045e+08	1612517457	5.19928e+08	6-Hydroxynicotinate	--	C6H5NO3	Pyridines and derivatives
	NEG_M138T455	1.12474e+07	1.20932e+07	2.09401e+07	--	--	--	--
	NEG_M138T62	7.25118e+06	1.78273e+07	3.26173e+07	--	--	--	--
	NEG_M138T434	5.87354e+07	6.74133e+07	4.71101e+07	--	--	--	--
	NEG_M138T380	2.65031e+07	1.82803e+08	4.42425e+07	--	--	--	--
	NEG_M138T215	5.42947e+06	2.6519e+07	4.02961e+06	--	--	--	--
	NEG_M138T289	4.56138e+06	1.70055e+07	1.81804e+07	--	--	--	--
	NEG_M138T307	1.10769e+07	2.52421e+07	1.58687e+07	--	--	--	--
	NEG_M138T404	1.08872e+07	1.51648e+07	9.28634e+06	--	--	--	--
	NEG_M138T346	5.57541e+06	1.01331e+07	1.50796e+06	--	--	--	--
	NEG_M138T40	4.76502e+06	5.17236e+06	1.11434e+07	--	--	--	--
	NEG_M138T58	612676	3.76602e+06	2.23269e+06	--	--	--	--
	NEG_M138T68	6.83025e+06	6.66873e+06	5.68533e+06	--	--	--	--
	NEG_M139T96	3.00564e+07	2.82823e+07	4.95444e+07	--	--	--	--
	NEG_M139T31	134.271	5.57038e+06	5.74704e+06	--	--	--	--
	NEG_M139T620	2.81707e+07	9.97413e+07	3.16131e+07	--	--	--	--
	NEG_M139T326	8.55277e+06	2.02537e+07	1.00278e+07	--	--	--	--
	NEG_M139T334	4.64942e+06	2.57215e+07	5.36105e+06	--	--	--	--
	NEG_M139T381	1.74221e+06	1.02016e+07	1.01855e+06	--	3-Aminopropanesulfonate	C3H9NO3S	--
	NEG_M139T64	5.76981e+06	3.09451e+06	3.70069e+06	--	4,5,6,7-Tetrahydroisoxazolo(5,4-c)pyridin-3-ol	C6H8N2O2	--
	NEG_M140T64	1.90384e+07	1.54433e+07	1.14006e+07	--	--	--	--
	NEG_M141T31	4.66475e+06	5.04665e+06	5.74496e+06	--	Carbamoyl phosphate	CH4NO5P	Organic phosphoric acids and derivatives
	NEG_M141T90	5.03863e+06	5.74309e+06	1.77813e+07	--	--	--	--
	NEG_M141T832	2.7371e+06	3.98008e+06	1.09105e+07	--	--	--	--
	NEG_M141T67	3.23123e+06	5.68451e+06	5.71318e+06	--	--	--	--
	NEG_M141T790	1.04179e+07	5.78184e+06	4.54572e+06	--	--	--	--
	NEG_M141T778	4.8357e+06	2.54706e+06	3.55056e+06	--	--	--	--
	NEG_M141T94	1.66847e+07	3.50881e+07	4.53142e+07	--	O-Phosphoethanolamine	C2H8NO4P	Organic phosphoric acids and derivatives
	NEG_M141T315	313038	4.17613e+06	425042	--	--	--	--
	NEG_M141T184	326776	3.65597e+06	2.65176e+06	--	--	--	--
	NEG_M141T40	2.84592e+06	1.89891e+06	805893	--	D-Alanyl-D-alanine	C6H12N2O3	Carboxylic acids and derivatives
	NEG_M143T103_1	987136	43249.5	1.87651e+06	--	2,4-Dichlorophenol	C6H4Cl2O	Benzene and substituted derivatives
	NEG_M143T83	13385312	1.58286e+07	4.99462e+07	--	--	--	--
	NEG_M143T102	4.9141e+08	3.61644e+08	3.79805e+08	--	--	--	--
	NEG_M143T31	5.33631e+06	3.0846e+06	2.53708e+06	--	--	--	--
	NEG_M143T407	4.72607e+06	2.46858e+06	2.19118e+06	--	--	--	--
	NEG_M143T118	3.34375e+08	8.21905e+07	1.33626e+08	--	--	--	--
	NEG_M143T93_1	1666959777	1615922991	1.65727e+09	--	--	--	--
	NEG_M143T205	5.68723e+07	1.05592e+08	3.12377e+08	--	--	--	--
	NEG_M143T233	9.2146e+07	5.99693e+07	9.21172e+07	--	--	--	--
	NEG_M143T269	5.32965e+07	7.38511e+07	9.79935e+07	--	--	--	--
	NEG_M143T693	2.88479e+07	5.4926e+07	9.47055e+07	--	--	--	--
	NEG_M143T837	6.52104e+07	2.95421e+07	2.72066e+07	--	--	--	--
	NEG_M143T762	1.86902e+07	2.14461e+07	2.88095e+07	--	--	--	--
	NEG_M143T354	5.08872e+07	2.80131e+07	6.09776e+07	--	--	--	--
	NEG_M143T299	3.14203e+07	1.26573e+08	1.45241e+08	--	--	--	--
	NEG_M143T174	3.9229e+07	5.784e+07	2.06421e+08	--	--	--	--
	NEG_M143T572	3.20698e+07	3.82584e+07	5.04812e+07	--	--	--	--
	NEG_M143T159	1.6332e+08	3.50813e+08	1.78945e+08	--	--	--	--
	NEG_M143T557	4.10573e+07	1.78101e+08	6.61682e+07	--	--	--	--
	NEG_M143T635	2.06231e+07	6.84387e+07	8.56436e+07	--	--	--	--
	NEG_M143T432	1.15956e+07	4.10804e+07	2.31961e+07	--	--	--	--
	NEG_M143T815	2.88711e+07	6.11256e+07	5.47519e+07	--	--	--	--
	NEG_M143T255	2.77458e+07	5.13988e+07	1.11506e+07	--	--	--	--
	NEG_M143T586	3.59063e+07	3.87034e+07	2.4773e+07	--	--	--	--
	NEG_M143T801	6.16614e+07	1.32817e+07	2.05935e+07	--	--	--	--
	NEG_M143T310	5.39118e+07	2.50923e+07	1.28917e+07	--	--	--	--
	NEG_M143T662	4.56811e+07	2.57795e+08	2.07456e+08	--	--	--	--
	NEG_M143T708	1.76167e+07	2.74159e+07	3.9261e+07	--	--	--	--
	NEG_M143T598	9.31618e+07	9.10278e+07	8.94368e+07	--	--	--	--
	NEG_M143T103_2	3.56423e+06	351510	348288	--	1,2-Dihydronaphthalene-1,2-diol	C10H10O2	Naphthalenes
	NEG_M143T39	665084	826302	306218	--	--	--	--
	NEG_M143T179	2.58468e+06	6.21478e+06	3.02794e+06	--	--	--	--
	NEG_M143T351	3.82943e+06	7.17678e+06	5.17647e+06	--	--	--	--
	NEG_M143T308	1.82519e+06	2.81466e+07	2.32619e+06	--	--	--	--
	NEG_M143T93_2	134.271	3.09596e+07	1.27098e+07	--	--	--	--
	NEG_M144T102	2.00546e+07	2.42377e+07	1.48747e+07	--	--	--	--
	NEG_M144T119	1.67447e+07	2.63969e+06	4.86055e+06	--	--	--	--
	NEG_M144T93	9.55888e+07	9.58222e+07	9.69699e+07	--	--	--	--
	NEG_M144T585	4.02808e+07	7.4662e+07	2.3685e+07	1H-Indole-3-carboxaldehyde	--	C9H7NO	Indoles and derivatives
	NEG_M144T414	4.16553e+06	9.09448e+06	4.69487e+06	--	--	--	--
	NEG_M144T361	1.3288e+06	3.89605e+06	3.7574e+06	--	--	--	--
	NEG_M144T39	4.18221e+06	5.34749e+06	1.98795e+06	--	--	--	--
	NEG_M144T97	5.99713e+06	3.78446e+06	1.01963e+06	--	4-Acetamidobutanoic acid	C6H11NO3	Carboxylic acids and derivatives
	NEG_M144T165	1.71764e+06	1.19456e+07	1.11806e+07	--	--	--	--
	NEG_M144T63	1.81865e+07	2.10407e+07	1.0863e+07	--	--	--	--
	NEG_M145T103_1	7.79188e+06	8.85656e+06	1.20775e+07	--	--	--	--
	NEG_M145T103_2	9.79584e+07	4.14916e+07	3.16023e+07	--	--	--	--
	NEG_M145T82	1.36066e+08	6.24589e+07	1.15518e+08	Oxoglutaric acid	--	C5H6O5	Keto acids and derivatives
	NEG_M145T95	4.14672e+07	8.91253e+07	2.75494e+08	--	--	--	--
	NEG_M145T422	2.42095e+06	2.02144e+06	2.92072e+06	--	--	--	--
	NEG_M145T118	4.11046e+07	2.27094e+07	2.16428e+07	--	--	--	--
	NEG_M145T175	3.01474e+07	5.57707e+07	1.15054e+07	--	1,5-Anhydrosorbitol	C6H12O5	Organooxygen compounds
	NEG_M145T225	1.67463e+07	5.93629e+06	2.73584e+07	--	--	--	--
	NEG_M145T90	1.60858e+07	3.74946e+08	1.09398e+07	L-Glutamine	--	C5H10N2O3	Carboxylic acids and derivatives
	NEG_M145T31	1.89833e+06	5.67646e+06	7.60513e+06	--	L-Glutamine	C5H10N2O3	Carboxylic acids and derivatives
	NEG_M145T407	1.995e+06	7.45923e+06	2.87463e+06	--	--	--	--
	NEG_M145T394	2.07303e+06	8.85693e+06	2.21381e+06	--	4-Guanidinobutanoic acid	C5H11N3O2	Stilbenes
	NEG_M146T108	134.271	2.42369e+06	5.32919e+06	--	--	--	--
	NEG_M146T32	3.38836e+06	2.68384e+06	2.62058e+06	--	--	--	--
	NEG_M146T62	3.77919e+06	3.21969e+06	2.54716e+06	--	--	--	--
	NEG_M146T45	1.5914e+06	1.60544e+06	897349	--	--	--	--
	NEG_M146T84	3.28204e+08	7.00749e+08	5.28506e+08	L-Glutamic acid	--	C5H9NO4	Carboxylic acids and derivatives
	NEG_M147T122	9.02094e+06	1.49051e+07	3.21462e+07	--	--	--	--
	NEG_M147T35	8.77861e+07	1.51974e+08	2.20257e+08	--	--	--	--
	NEG_M147T60	1.06921e+08	1.12363e+08	8.18041e+07	--	--	--	--
	NEG_M147T661	1.07809e+08	7.17112e+07	4.73705e+07	--	--	--	--
	NEG_M147T682	3.00957e+08	5.24679e+07	4.78857e+07	--	--	--	--
	NEG_M147T48	6.69081e+07	3.05617e+07	2.32462e+07	--	--	--	--
	NEG_M147T625	1.7323e+07	1.83604e+07	3.0227e+07	--	--	--	--
	NEG_M147T259	1.41118e+08	4.38583e+07	1.85579e+07	--	--	--	--
	NEG_M147T645	1.13417e+08	3.63881e+07	4.45579e+07	--	--	--	--
	NEG_M147T284	4.6879e+07	3.62651e+07	6.34105e+06	--	Nornicotine	C9H12N2	Pyridines and derivatives
	NEG_M147T708	1.1433e+08	1.10699e+08	8.60766e+07	--	--	--	--
	NEG_M147T736	1.44282e+08	4.77756e+07	5.39861e+07	trans-Cinnamate	--	C9H8O2	Cinnamic acids and derivatives
	NEG_M147T121	4.03197e+07	3.66836e+07	3.35965e+07	--	--	--	--
	NEG_M147T102_1	8.97958e+06	6.35326e+06	4.42572e+06	--	--	--	--
	NEG_M147T102_2	8.09293e+08	9.50044e+08	9.2022e+08	--	--	--	--
	NEG_M147T135	1.89344e+08	2.26956e+08	2.50361e+08	--	--	--	--
	NEG_M147T157	2.93681e+08	434996533	4.63578e+08	--	--	--	--
	NEG_M147T836	7.95481e+08	1.256e+08	1.54831e+07	--	--	--	--
	NEG_M147T634	7.57881e+08	1.05681e+08	9.78474e+07	--	--	--	--
	NEG_M147T741	1.34477e+08	8.87637e+07	8.33223e+07	--	--	--	--
	NEG_M147T249	4.76296e+07	2.3934e+08	1.10534e+08	--	--	--	--
	NEG_M147T498	4.62354e+07	4.6834e+07	8.75431e+07	--	--	--	--
	NEG_M147T763	6.41592e+07	2.92629e+07	3.94373e+07	--	--	--	--
	NEG_M147T431	9.68572e+07	5.96939e+07	6.48821e+07	--	--	--	--
	NEG_M147T827	1.18982e+07	2.69958e+07	1.24604e+08	--	--	--	--
	NEG_M147T467	5.91766e+07	3.63726e+07	1.05574e+08	L-Lyxonate	--	C5H10O6	Organooxygen compounds
	NEG_M147T444	2.30343e+07	8.16914e+07	1.2361e+08	L-Xylonate	--	C5H10O6	Organooxygen compounds
	NEG_M147T308	3.06216e+08	4.88582e+07	4.64174e+07	--	--	--	--
	NEG_M147T694	6.31916e+07	5.96829e+07	2.92032e+08	--	--	--	--
	NEG_M147T704	2.39608e+07	6.19479e+07	6.22022e+07	L-2-Hydroxyglutaric acid	--	C5H8O5	Fatty Acyls
	NEG_M147T558	1.40566e+08	4.26536e+07	6.69318e+07	--	--	--	--
	NEG_M147T454	1.42065e+07	3.32927e+07	6.32214e+07	--	--	--	--
	NEG_M147T752	2.79894e+07	3.78884e+07	2.69648e+07	--	--	--	--
	NEG_M147T86	1241084075	5.84514e+08	1.38185e+09	--	--	--	--
	NEG_M147T646	1.8339e+07	5.79337e+07	5.95065e+07	--	--	--	--
	NEG_M147T323	1095467778	3.88546e+07	4.76161e+07	--	--	--	--
	NEG_M147T722	2.49744e+08	5.66381e+07	7.85283e+07	--	--	--	--
	NEG_M147T663	2.27164e+08	1.67127e+08	2.04697e+08	--	--	--	--
	NEG_M147T674	9.58997e+07	1.20967e+08	3.45952e+07	--	--	--	--
	NEG_M147T279	4.10626e+06	9.66025e+06	2.51395e+07	--	--	--	--
	NEG_M147T84	1.91016e+08	3.90959e+07	4.28822e+07	--	--	--	--
	NEG_M147T317	2.13549e+07	3.62416e+07	3.05522e+07	--	--	--	--
	NEG_M147T189	1.35178e+07	3.92298e+07	9.27562e+06	--	--	--	--
	NEG_M147T101	2.73698e+07	4.53182e+07	1.67522e+07	--	(R)-Mevalonate	C6H12O4	Fatty Acyls
	NEG_M147T131	1.42942e+07	5.97018e+07	3.54381e+07	--	--	--	--
	NEG_M147T329	1.64764e+07	2.20694e+07	2.24958e+07	--	--	--	--
	NEG_M147T209_2	8.57446e+06	2.0427e+07	9.2495e+06	--	--	--	--
	NEG_M147T163	9.32189e+07	8.91044e+07	5.87987e+07	--	--	--	--
	NEG_M147T102_3	2.14018e+06	3.95325e+06	4.56931e+06	--	--	--	--
	NEG_M148T102	4.04971e+07	4.17333e+07	4.57928e+07	--	--	--	--
	NEG_M148T86	7.33906e+07	4.5274e+07	6.37873e+07	--	--	--	--
	NEG_M148T136	5.23614e+06	1.21899e+07	2.23197e+07	--	--	--	--
	NEG_M148T156	1.09254e+07	1.85097e+07	1.9839e+07	--	--	--	--
	NEG_M148T43	5.07339e+06	3.89411e+06	2.28761e+06	--	--	--	--
	NEG_M149T79_1	1.34239e+08	6.98853e+07	1.0659e+08	--	--	--	--
	NEG_M149T107	7.53035e+06	874798	3.14872e+06	--	--	--	--
	NEG_M149T195	3.27485e+07	4.27397e+07	2.80705e+07	--	--	--	--
	NEG_M149T79_2	23820746423	12023455819	1.72463e+10	Tartaric acid	--	C4H6O6	Organooxygen compounds
	NEG_M149T93	8.86186e+08	9.95764e+08	1.7315e+09	--	--	--	--
	NEG_M149T373	4.2817e+07	2.07733e+07	3.53286e+07	--	--	--	--
	NEG_M149T505	3.56939e+07	1.96462e+07	4.24701e+07	--	--	--	--
	NEG_M149T217	1.14393e+08	1.14576e+08	1.48242e+08	--	--	--	--
	NEG_M149T308	2.46785e+07	3.53043e+07	7.69275e+07	--	--	--	--
	NEG_M149T364	4.18689e+07	5.3851e+07	3.92319e+07	--	--	--	--
	NEG_M149T611	3.30442e+07	2.37961e+07	2.84177e+07	--	--	--	--
	NEG_M149T531	1.72678e+07	1.92582e+07	1.53036e+07	--	--	--	--
	NEG_M149T553	4.61024e+07	7.3234e+07	5.04109e+07	--	--	--	--
	NEG_M149T326	6.0517e+07	2.76808e+07	3.0673e+07	--	--	--	--
	NEG_M149T587	2.22301e+07	1.21734e+07	3.12091e+07	--	--	--	--
	NEG_M149T103	3.38778e+08	1.32883e+08	6.02025e+07	--	--	--	--
	NEG_M149T437	4.8581e+07	3.52311e+07	3.68499e+07	--	--	--	--
	NEG_M149T268	2.94842e+07	2.35576e+07	3.21113e+07	--	--	--	--
	NEG_M149T171	4.85341e+08	6.79103e+08	5.3083e+08	--	--	--	--
	NEG_M149T390	6.02315e+07	3.66647e+07	2.78717e+07	--	3-Methyladenine	C6H7N5	Imidazopyrimidines
	NEG_M149T454	3.33997e+07	2.64079e+07	2.03923e+07	--	--	--	--
	NEG_M149T400	2.31013e+07	1.0218e+07	3.55549e+07	--	--	--	--
	NEG_M149T625_1	1.68532e+07	1.93829e+07	1.65523e+07	--	--	--	--
	NEG_M149T579	1.21119e+07	1.20048e+07	8.83454e+06	--	--	--	--
	NEG_M149T205	1.23998e+08	7.78852e+07	9.22005e+07	--	--	--	--
	NEG_M149T416	100386534	4.50286e+07	3.40159e+07	--	--	--	--
	NEG_M149T805	1.68397e+07	1.33451e+07	1.656e+07	meso-Tartaric acid	--	C4H6O6	--
	NEG_M149T835	7.99085e+06	3.74518e+06	1.79155e+06	--	--	--	--
	NEG_M149T516	1.40325e+07	1.46696e+08	8.99939e+07	--	--	--	--
	NEG_M149T598	1.51169e+07	1.81738e+07	3.28613e+07	--	--	--	--
	NEG_M149T768	132582548	1.76996e+07	1.91404e+08	--	--	--	--
	NEG_M149T342	9.21047e+06	1.63186e+07	3.59543e+07	--	--	--	--
	NEG_M149T734	2.56812e+07	7.34746e+06	3.75721e+07	--	--	--	--
	NEG_M149T785	1.65488e+07	9.5834e+06	1.72242e+07	--	--	--	--
	NEG_M149T156	1.04329e+08	1.38437e+08	5.01586e+08	--	--	--	--
	NEG_M149T138	870198441	2343600688	2.82796e+09	--	--	--	--
	NEG_M149T456	1.7325e+07	6.18511e+07	3.65414e+07	alpha-Oxo-benzeneacetic acid	--	C8H6O3	Benzene and substituted derivatives
	NEG_M149T512	7.78882e+06	1.48242e+07	7.68058e+06	--	--	--	--
	NEG_M149T535	5.6477e+06	1.01592e+07	5.79141e+06	--	--	--	--
	NEG_M149T635	1.03104e+07	5.82967e+06	2.24904e+06	--	--	--	--
	NEG_M149T664	8.54869e+06	2.49795e+07	6.59559e+06	--	--	--	--
	NEG_M149T545	4.78846e+06	7.62918e+06	5.00913e+06	--	--	--	--
	NEG_M149T708	1.93183e+06	5.98529e+06	4.65325e+06	--	--	--	--
	NEG_M149T779	4.36988e+06	1.57384e+07	5.05216e+06	--	--	--	--
	NEG_M149T577	9.29805e+06	5.40517e+06	4.85503e+06	--	--	--	--
	NEG_M149T649	2.84454e+06	4.41841e+06	5.52045e+06	--	--	--	--
	NEG_M149T89_2	1850902472	2522763774	1.67314e+09	--	L-Methionine	C5H11NO2S	Carboxylic acids and derivatives
	NEG_M149T661_2	1.46738e+07	1.17534e+07	6.2808e+06	(S)-4-Hydroxymandelonitrile	--	C8H7NO2	Phenols
	NEG_M149T625_2	774650	3.62435e+06	352300	--	Hydrocinnamic acid	C9H10O2	Phenylpropanoic acids
	NEG_M149T79_3	1.2574e+08	6.05179e+07	7.97314e+07	--	7-Methyladenine	C6H7N5	Imidazopyrimidines
	NEG_M149T89_3	5.32397e+06	7.68619e+06	1.64053e+06	--	--	--	--
	NEG_M150T79	9.92846e+08	4.9708e+08	7.0621e+08	--	--	--	--
	NEG_M150T171	4.8195e+07	2.18757e+07	1.76272e+07	--	--	--	--
	NEG_M150T155	3.7387e+06	6.98127e+06	3.45097e+07	--	--	--	--
	NEG_M150T94	2.35692e+07	5.58122e+07	6.29572e+07	--	--	--	--
	NEG_M150T188	1.81057e+07	9.37667e+07	3.35256e+07	--	--	--	--
	NEG_M150T89	8.17413e+07	1.2907e+08	8.28799e+07	--	--	--	--
	NEG_M150T352	1.07494e+06	1.25045e+07	2.19699e+06	--	--	--	--
	NEG_M150T40	5.79541e+06	950995	2.81378e+06	--	--	--	--
	NEG_M151T636	889483	2.19835e+06	1.33012e+06	--	--	--	--
	NEG_M151T79	2.75019e+08	1.27711e+08	1.8457e+08	--	--	--	--
	NEG_M151T171	5.20777e+06	7.83265e+06	4.77691e+06	--	Mercaptopurine	C5H4N4S	Imidazopyrimidines
	NEG_M151T155	1.56304e+06	2.91642e+06	5.40155e+06	--	--	--	--
	NEG_M151T32	1.0851e+07	4.02889e+06	2.66795e+06	--	--	--	--
	NEG_M151T204	7.38728e+06	2.69972e+07	1.0712e+07	--	--	--	--
	NEG_M151T61	5.94955e+06	2.10353e+06	4.09095e+06	--	--	--	--
	NEG_M151T531	4.57608e+07	3.41528e+07	2.74187e+07	--	--	--	--
	NEG_M151T610	2.35982e+07	2.85101e+07	1.20026e+07	Vanillin	--	C8H8O3	Phenols
	NEG_M151T414	3.26357e+07	1.16192e+08	3.06307e+07	--	--	--	--
	NEG_M151T574	1.31801e+07	1.89227e+07	1.12809e+07	--	--	--	--
	NEG_M151T483	2.15585e+07	3.91388e+07	1.375e+07	--	--	--	--
	NEG_M151T598	3.42688e+06	1.91626e+07	1.00346e+07	--	--	--	--
	NEG_M151T377	3.97577e+06	1.54533e+07	6.24791e+06	--	4-Hydroxy-3-methylbenzoate	C8H8O3	Benzene and substituted derivatives
	NEG_M151T42	7.29884e+06	8.98346e+06	1.68603e+06	--	--	--	--
	NEG_M151T586	3.21993e+06	7.46871e+06	6.02019e+06	--	--	--	--
	NEG_M151T834	2.04478e+07	1.99923e+07	6.57273e+06	--	--	--	--
	NEG_M151T660	3.12035e+07	2.24151e+07	1.56644e+07	2,4-Dihydroxyacetophenone	--	C8H8O3	Benzene and substituted derivatives
	NEG_M151T706	2.66221e+07	4.87245e+07	2.27528e+07	p-Anisic acid	--	C8H8O3	Benzene and substituted derivatives
	NEG_M151T635	8.7586e+08	2.95582e+07	1.23579e+07	--	--	--	--
	NEG_M151T624	4.25809e+06	1.56594e+07	2.56316e+06	--	--	--	--
	NEG_M151T549	6.45615e+06	2.56345e+07	3.68672e+07	--	--	--	--
	NEG_M151T815	134.271	3.20692e+07	1.4846e+07	--	Methyl 2-hydroxybenzoate	C8H8O3	Benzene and substituted derivatives
	NEG_M151T646	4.34854e+06	9.19831e+06	8.27623e+06	--	--	--	--
	NEG_M151T464	8.08303e+07	2.29687e+08	6.21589e+07	2-Hydroxyphenylacetate	--	C8H8O3	Benzene and substituted derivatives
	NEG_M151T751	2.79771e+06	5.55776e+06	6.32103e+06	--	4-Hydroxyphenyl acetate	C8H8O3	Phenol esters
	NEG_M151T89	1.31934e+07	1.85407e+07	9.07927e+06	--	--	--	--
	NEG_M151T54	1.16035e+06	1.81224e+06	2.18776e+06	--	--	--	--
	NEG_M151T69	5.52927e+06	5.22047e+06	5.21305e+06	--	--	--	--
	NEG_M151T44	6.39756e+06	7.05921e+06	7.93524e+06	--	--	--	--
	NEG_M151T94	2.91839e+07	1.69999e+08	5.22418e+07	--	--	--	--
	NEG_M151T502	134.271	6.05543e+06	8.15375e+06	--	Perillyl alcohol	C10H16O	Prenol lipids
	NEG_M152T218	28743868	5.27545e+07	3.9453e+07	--	--	--	--
	NEG_M152T247	3.53135e+06	2.21866e+07	5.86917e+06	--	--	--	--
	NEG_M152T233	4.69506e+06	6.85908e+06	5.35767e+06	--	--	--	--
	NEG_M152T706	7.9813e+07	2.50683e+08	8.92851e+07	3-Hydroxyanthranilate	--	C7H7NO3	Benzene and substituted derivatives
[truncated: 7,689 more rows]

## Sheet: Table S10
	Table S10. The details of all positive metabolites detected
[truncated: 14,295 more rows]

[truncated: 19 more sheets: Table S11, Table S12, Table S13, Table S14, Table S15, Table S16, Table S17, Table S18, Table S19 , Table S20, Table S21, Table S22, Table S23, Table S24, Table S25, Table S26, Table S27, Table S28, Table S29]
